# Supplementary material
Source: publisher figshare collection journal article supplement (https://acs.figshare.com/ndownloader/files/3618588)
Supplement: Supplementary file 1 [file 3618588]

data_rem113
_audit_creation_date              2013-03-14
_audit_creation_method
;
  Olex2 1.2
  (compiled Dec  5 2012 16:20:19, GUI svn.r4385)
;
_publ_author_name                 'R. Maleczka'
_publ_contact_author_address      ?
_publ_contact_author_email        ?
_publ_contact_author_name         ''
_publ_contact_author_phone        ?
_chemical_name_common             ?
_chemical_name_systematic
;
 ? 
;
_chemical_formula_moiety          'C21 H28 O Si'
_chemical_formula_sum             'C21 H28 O Si'
_chemical_formula_weight          324.52
_chemical_melting_point           ?
loop_
  _atom_type_symbol
  _atom_type_description
  _atom_type_scat_dispersion_real
  _atom_type_scat_dispersion_imag
  _atom_type_scat_source
 'C' 'C' 0.0181 0.0091 'International Tables Vol C Tables 4.2.6.8 and 6.1.1.4'
 'H' 'H' 0.0000 0.0000 'International Tables Vol C Tables 4.2.6.8 and 6.1.1.4'
 'O' 'O' 0.0492 0.0322 'International Tables Vol C Tables 4.2.6.8 and 6.1.1.4'
 'Si' 'Si' 0.2541 0.3302 'International Tables Vol C Tables 4.2.6.8 and 6.1.1.4'

_space_group_crystal_system       'monoclinic'
_space_group_IT_number            14
_space_group_name_H-M_alt         'P 1 21/c 1'
_space_group_name_Hall            '-P 2ybc'
loop_
  _space_group_symop_id
  _space_group_symop_operation_xyz
 1 'x, y, z'
 2 '-x, y+1/2, -z+1/2'
 3 '-x, -y, -z'
 4 'x, -y-1/2, z-1/2'

loop_
  _symmetry_equiv_pos_as_xyz
 'x, y, z'
 '-x, y+1/2, -z+1/2'
 '-x, -y, -z'
 'x, -y-1/2, z-1/2'

_cell_length_a                    9.95030(10)
_cell_length_b                    8.14580(10)
_cell_length_c                    22.6084(3)
_cell_angle_alpha                 90.00
_cell_angle_beta                  92.0430(10)
_cell_angle_gamma                 90.00
_cell_volume                      1831.32(4)
_cell_formula_units_Z             4
_cell_measurement_reflns_used     9965
_cell_measurement_temperature     173(2)
_cell_measurement_theta_max       68.211
_cell_measurement_theta_min       5.774
_exptl_absorpt_coefficient_mu     1.131
_exptl_absorpt_correction_T_max   0.7531
_exptl_absorpt_correction_T_min   0.6739
_exptl_absorpt_correction_type    multi-scan
_exptl_absorpt_process_details
;
SADABS-2012/1 (Bruker,2012) was used for absorption correction.
wR2(int) was 0.0751 before and 0.0447 after correction.
The Ratio of minimum to maximum transmission is 0.8948.
The \l/2 correction factor is 0.0015.
;
_exptl_crystal_colour             'colourless'
_exptl_crystal_density_diffrn     1.177
_exptl_crystal_density_meas       .
_exptl_crystal_density_method     'not measured'
_exptl_crystal_description        'block'
_exptl_crystal_F_000              704
_exptl_crystal_size_max           0.428
_exptl_crystal_size_mid           0.316
_exptl_crystal_size_min           0.191
_exptl_special_details
;
Data was collected using a BRUKER CCD (charge coupled device) based
diffractometer equipped with an Oxford low-temperature apparatus operating at
173 K.  A suitable crystal was chosen and mounted on a nylon loop using 
Paratone oil.  Data  were measured using omega and phi scans of 1.0\% per frame 
for 30 s. The total number of images were based on 
results from the program COSMO where redundancy was expected to be 4 and 
completeness to 0.83\%A to 100%. Cell parameters were
retrieved using APEX II software and refined using SAINT on all observed
reflections.Data reduction was performed using the SAINT software which 
corrects for Lp. Scaling and absorption corrections were applied using SADABS6 
multi-scan technique, supplied by George Sheldrick.  The structures are solved 
by the direct method using the SHELXS-97 program and refined by least squares 
method on F2, SHELXL-97, incorporated in OLEX2. 
;
_diffrn_reflns_av_R_equivalents   0.0372
_diffrn_reflns_av_unetI/netI      0.0186
_diffrn_reflns_limit_h_max        11
_diffrn_reflns_limit_h_min        -11
_diffrn_reflns_limit_k_max        9
_diffrn_reflns_limit_k_min        -9
_diffrn_reflns_limit_l_max        27
_diffrn_reflns_limit_l_min        -27
_diffrn_reflns_number             31801
_diffrn_reflns_theta_full         68.31
_diffrn_reflns_theta_max          68.31
_diffrn_reflns_theta_min          3.91
_diffrn_ambient_temperature       173.01
_diffrn_detector_area_resol_mean  836.6
_diffrn_measured_fraction_theta_full 0.996
_diffrn_measured_fraction_theta_max 0.996
_diffrn_measurement_device_type   'Bruker APEX-II CCD'
_diffrn_measurement_method        '\f and \w scans'
_diffrn_radiation_monochromator   'graphite'
_diffrn_radiation_type            'CuK\a'
_diffrn_radiation_wavelength      1.54178
_diffrn_source                    'fine-focus sealed tube'
_diffrn_standards_number          0
_reflns_number_gt                 3081
_reflns_number_total              3328
_reflns_threshold_expression      >2sigma(I)
_computing_cell_refinement        'APEX2 (BRUKER, V2012.10-0, 2012)'
_computing_data_collection        'COSMO (BRUKER, V1.61, 2009)'
_computing_data_reduction         'SAINT v8.27A (Bruker, 2012)'
_computing_molecular_graphics
;
O. V. Dolomanov, L. J. Bourhis, R. J. Gildea, J. A. K. Howard and H. Puschmann,
OLEX2: a complete structure solution, refinement and analysis program.
J. Appl. Cryst. (2009). 42, 339-341.
;
_computing_publication_material
;
O. V. Dolomanov, L. J. Bourhis, R. J. Gildea, J. A. K. Howard and H. Puschmann,
OLEX2: a complete structure solution, refinement and analysis program.
J. Appl. Cryst. (2009). 42, 339-341.
;
_computing_structure_refinement
;
XL, G.M. Sheldrick, Acta Cryst.
(2008). A64, 112-122
;
_computing_structure_solution
;
XS, G.M. Sheldrick, Acta Cryst.
(2008). A64, 112-122
;
_refine_diff_density_max          0.377
_refine_diff_density_min          -0.214
_refine_diff_density_rms          0.040
_refine_ls_extinction_coef        ?
_refine_ls_extinction_method      none
_refine_ls_goodness_of_fit_ref    1.051
_refine_ls_hydrogen_treatment     constr
_refine_ls_matrix_type            full
_refine_ls_number_parameters      212
_refine_ls_number_reflns          3328
_refine_ls_number_restraints      0
_refine_ls_R_factor_all           0.0354
_refine_ls_R_factor_gt            0.0329
_refine_ls_restrained_S_all       1.051
_refine_ls_shift/su_max           0.001
_refine_ls_shift/su_mean          0.000
_refine_ls_structure_factor_coef  Fsqd
_refine_ls_weighting_details
'calc w=1/[\s^2^(Fo^2^)+(0.0427P)^2^+0.8454P] where P=(Fo^2^+2Fc^2^)/3'
_refine_ls_weighting_scheme       calc
_refine_ls_wR_factor_gt           0.0867
_refine_ls_wR_factor_ref          0.0887
_refine_special_details
;
 Refinement of F^2^ against ALL reflections.  The weighted R-factor wR and 
 goodness of fit S are based on F^2^, conventional R-factors R are based 
 on F, with F set to zero for negative F^2^. The threshold expression of 
 F^2^ > 2sigma(F^2^) is used only for calculating R-factors(gt) etc. and is 
 not relevant to the choice of reflections for refinement.  R-factors based 
 on F^2^ are statistically about twice as large as those based on F, and R- 
 factors based on ALL data will be even larger. 
;
_olex2_refinement_description
;
1. Fixed Uiso
 At 1.2 times of:
  {H20A,H20B} of C20, {H18A,H18B} of C18, H12 of C12, H14 of C14, H11 of C11,
  H10 of C10, H9 of C9, H7 of C7, H5 of C5, H4 of C4, {H3A,H3B} of C3, H2 of C2,
   {H16A,H16B} of C16, H15 of C15
 At 1.5 times of:
  {H21A,H21B,H21C} of C21, {H19A,H19B,H19C} of C19, H1 of O1, {H17A,H17B,
  H17C} of C17
2.a Ternary CH refined with riding coordinates:
 C2(H2)
2.b Secondary CH2 refined with riding coordinates:
 C3(H3A,H3B), C16(H16A,H16B), C18(H18A,H18B), C20(H20A,H20B)
2.c Aromatic/amide H refined with riding coordinates:
 C4(H4), C5(H5), C7(H7), C9(H9), C10(H10), C11(H11), C12(H12), C14(H14),
 C15(H15)
2.d Idealised Me refined as rotating group:
 C17(H17A,H17B,H17C), C19(H19A,H19B,H19C), C21(H21A,H21B,H21C)
2.e Idealised tetrahedral OH refined as rotating group:
 O1(H1)
;
_atom_sites_solution_hydrogens    geom
_atom_sites_solution_primary      direct
_atom_sites_solution_secondary    difmap
loop_
  _atom_site_label
  _atom_site_type_symbol
  _atom_site_fract_x
  _atom_site_fract_y
  _atom_site_fract_z
  _atom_site_U_iso_or_equiv
  _atom_site_adp_type
  _atom_site_occupancy
  _atom_site_symmetry_multiplicity
  _atom_site_calc_flag
  _atom_site_refinement_flags
  _atom_site_disorder_assembly
  _atom_site_disorder_group
 Si1 Si 0.24745(3) 0.84087(4) 0.086363(14) 0.01809(11) Uani 1 1 d . . .
 O1 O 0.19572(10) 0.67332(12) 0.18502(4) 0.0283(2) Uani 1 1 d . . .
 H1 H 0.2015 0.6564 0.2217 0.042 Uiso 1 1 calc R . .
 C1 C 0.26229(13) 0.82692(16) 0.17152(6) 0.0214(3) Uani 1 1 d . . .
 C2 C 0.20764(13) 0.97143(17) 0.20930(6) 0.0227(3) Uani 1 1 d . . .
 H2 H 0.1908 0.9222 0.2489 0.027 Uiso 1 1 calc R . .
 C3 C 0.32950(14) 1.08557(18) 0.21992(6) 0.0288(3) Uani 1 1 d . . .
 H3A H 0.3345 1.1697 0.1885 0.035 Uiso 1 1 calc R . .
 H3B H 0.3268 1.1405 0.2589 0.035 Uiso 1 1 calc R . .
 C4 C 0.44483(14) 0.9665(2) 0.21775(6) 0.0311(3) Uani 1 1 d . . .
 H4 H 0.5329 0.9885 0.2333 0.037 Uiso 1 1 calc R . .
 C5 C 0.40871(14) 0.82790(18) 0.19160(6) 0.0277(3) Uani 1 1 d . . .
 H5 H 0.4682 0.7385 0.1860 0.033 Uiso 1 1 calc R . .
 C6 C 0.07533(13) 1.04901(17) 0.18957(5) 0.0212(3) Uani 1 1 d . . .
 C7 C 0.06185(13) 1.21067(17) 0.17407(6) 0.0219(3) Uani 1 1 d . . .
 H7 H 0.1396 1.2784 0.1748 0.026 Uiso 1 1 calc R . .
 C8 C -0.06427(13) 1.28059(17) 0.15700(5) 0.0222(3) Uani 1 1 d . . .
 C9 C -0.07720(14) 1.44830(18) 0.14173(6) 0.0286(3) Uani 1 1 d . . .
 H9 H 0.0000 1.5171 0.1433 0.034 Uiso 1 1 calc R . .
 C10 C -0.19935(15) 1.5127(2) 0.12468(7) 0.0339(3) Uani 1 1 d . . .
 H10 H -0.2065 1.6253 0.1142 0.041 Uiso 1 1 calc R . .
 C11 C -0.31500(15) 1.4122(2) 0.12267(7) 0.0350(4) Uani 1 1 d . . .
 H11 H -0.3996 1.4575 0.1107 0.042 Uiso 1 1 calc R . .
 C12 C -0.30609(14) 1.25037(19) 0.13784(6) 0.0299(3) Uani 1 1 d . . .
 H12 H -0.3849 1.1844 0.1366 0.036 Uiso 1 1 calc R . .
 C13 C -0.18097(13) 1.17931(17) 0.15535(6) 0.0234(3) Uani 1 1 d . . .
 C14 C -0.16592(13) 1.01230(17) 0.17215(6) 0.0252(3) Uani 1 1 d . . .
 H14 H -0.2426 0.9427 0.1716 0.030 Uiso 1 1 calc R . .
 C15 C -0.04314(13) 0.94994(17) 0.18911(6) 0.0244(3) Uani 1 1 d . . .
 H15 H -0.0364 0.8382 0.2009 0.029 Uiso 1 1 calc R . .
 C16 C 0.06832(13) 0.81290(17) 0.05948(6) 0.0244(3) Uani 1 1 d . . .
 H16A H 0.0231 0.7394 0.0874 0.029 Uiso 1 1 calc R . .
 H16B H 0.0226 0.9208 0.0607 0.029 Uiso 1 1 calc R . .
 C17 C 0.04864(15) 0.7425(2) -0.00288(7) 0.0344(3) Uani 1 1 d . . .
 H17A H 0.0951 0.8121 -0.0310 0.052 Uiso 1 1 calc R . .
 H17B H -0.0476 0.7390 -0.0137 0.052 Uiso 1 1 calc R . .
 H17C H 0.0858 0.6311 -0.0039 0.052 Uiso 1 1 calc R . .
 C18 C 0.35727(14) 0.67617(17) 0.05551(7) 0.0274(3) Uani 1 1 d . . .
 H18A H 0.3537 0.6863 0.0118 0.033 Uiso 1 1 calc R . .
 H18B H 0.4512 0.6981 0.0692 0.033 Uiso 1 1 calc R . .
 C19 C 0.32352(16) 0.49801(19) 0.07122(8) 0.0397(4) Uani 1 1 d . . .
 H19A H 0.3823 0.4235 0.0500 0.060 Uiso 1 1 calc R . .
 H19B H 0.2295 0.4751 0.0597 0.060 Uiso 1 1 calc R . .
 H19C H 0.3372 0.4816 0.1140 0.060 Uiso 1 1 calc R . .
 C20 C 0.31266(14) 1.04547(16) 0.06217(6) 0.0242(3) Uani 1 1 d . . .
 H20A H 0.2567 1.1329 0.0792 0.029 Uiso 1 1 calc R . .
 H20B H 0.4056 1.0594 0.0785 0.029 Uiso 1 1 calc R . .
 C21 C 0.31330(15) 1.06847(19) -0.00520(6) 0.0307(3) Uani 1 1 d . . .
 H21A H 0.3693 0.9834 -0.0225 0.046 Uiso 1 1 calc R . .
 H21B H 0.3498 1.1770 -0.0143 0.046 Uiso 1 1 calc R . .
 H21C H 0.2212 1.0597 -0.0218 0.046 Uiso 1 1 calc R . .

loop_
  _atom_site_aniso_label
  _atom_site_aniso_U_11
  _atom_site_aniso_U_22
  _atom_site_aniso_U_33
  _atom_site_aniso_U_23
  _atom_site_aniso_U_13
  _atom_site_aniso_U_12
 Si1 0.01767(19) 0.01749(19) 0.01908(19) 0.00111(13) 0.00005(13) -0.00040(12)
 O1 0.0348(6) 0.0245(5) 0.0254(5) 0.0078(4) -0.0004(4) -0.0037(4)
 C1 0.0213(6) 0.0219(6) 0.0209(6) 0.0043(5) -0.0007(5) -0.0006(5)
 C2 0.0219(6) 0.0281(7) 0.0181(6) 0.0003(5) -0.0003(5) -0.0021(5)
 C3 0.0230(7) 0.0339(8) 0.0291(7) -0.0057(6) -0.0042(5) -0.0030(6)
 C4 0.0201(7) 0.0441(9) 0.0287(7) 0.0006(6) -0.0056(5) -0.0010(6)
 C5 0.0229(7) 0.0357(8) 0.0241(7) 0.0050(6) -0.0039(5) 0.0053(6)
 C6 0.0204(6) 0.0276(7) 0.0157(6) -0.0028(5) 0.0024(5) -0.0005(5)
 C7 0.0196(6) 0.0271(7) 0.0192(6) -0.0030(5) 0.0027(5) -0.0039(5)
 C8 0.0223(6) 0.0273(7) 0.0171(6) -0.0036(5) 0.0031(5) -0.0013(5)
 C9 0.0283(7) 0.0282(7) 0.0293(7) -0.0003(6) 0.0026(6) -0.0013(6)
 C10 0.0358(8) 0.0303(8) 0.0356(8) 0.0026(6) 0.0004(6) 0.0051(6)
 C11 0.0261(7) 0.0433(9) 0.0352(8) -0.0014(7) -0.0034(6) 0.0099(6)
 C12 0.0203(7) 0.0397(8) 0.0296(7) -0.0057(6) 0.0004(5) -0.0012(6)
 C13 0.0223(7) 0.0305(7) 0.0175(6) -0.0056(5) 0.0028(5) -0.0008(5)
 C14 0.0208(6) 0.0298(7) 0.0253(7) -0.0052(6) 0.0048(5) -0.0068(5)
 C15 0.0249(7) 0.0248(7) 0.0236(7) -0.0014(5) 0.0046(5) -0.0027(5)
 C16 0.0207(6) 0.0294(7) 0.0229(7) 0.0035(5) -0.0018(5) -0.0019(5)
 C17 0.0309(8) 0.0397(9) 0.0319(8) -0.0068(7) -0.0081(6) -0.0002(6)
 C18 0.0247(7) 0.0253(7) 0.0323(7) -0.0045(6) 0.0020(6) 0.0026(5)
 C19 0.0330(8) 0.0231(7) 0.0628(11) -0.0063(7) -0.0007(7) 0.0034(6)
 C20 0.0263(7) 0.0214(7) 0.0251(7) 0.0010(5) 0.0031(5) -0.0043(5)
 C21 0.0342(8) 0.0313(8) 0.0269(7) 0.0054(6) 0.0050(6) -0.0051(6)

_geom_special_details
;
 All esds (except the esd in the dihedral angle between two l.s. planes) 
 are estimated using the full covariance matrix.  The cell esds are taken 
 into account individually in the estimation of esds in distances, angles 
 and torsion angles; correlations between esds in cell parameters are only 
 used when they are defined by crystal symmetry.  An approximate (isotropic) 
 treatment of cell esds is used for estimating esds involving l.s. planes. 
;
loop_
  _geom_bond_atom_site_label_1
  _geom_bond_atom_site_label_2
  _geom_bond_distance
  _geom_bond_site_symmetry_2
  _geom_bond_publ_flag
 Si1 C1 1.9290(13) . ?
 Si1 C16 1.8765(13) . ?
 Si1 C18 1.8802(14) . ?
 Si1 C20 1.8770(13) . ?
 O1 H1 0.8400 . ?
 O1 C1 1.4532(15) . ?
 C1 C2 1.5634(18) . ?
 C1 C5 1.5105(18) . ?
 C2 H2 1.0000 . ?
 C2 C3 1.5400(18) . ?
 C2 C6 1.5132(18) . ?
 C3 H3A 0.9900 . ?
 C3 H3B 0.9900 . ?
 C3 C4 1.505(2) . ?
 C4 H4 0.9500 . ?
 C4 C5 1.319(2) . ?
 C5 H5 0.9500 . ?
 C6 C7 1.3680(19) . ?
 C6 C15 1.4283(18) . ?
 C7 H7 0.9500 . ?
 C7 C8 1.4191(19) . ?
 C8 C9 1.414(2) . ?
 C8 C13 1.4238(18) . ?
 C9 H9 0.9500 . ?
 C9 C10 1.367(2) . ?
 C10 H10 0.9500 . ?
 C10 C11 1.412(2) . ?
 C11 H11 0.9500 . ?
 C11 C12 1.364(2) . ?
 C12 H12 0.9500 . ?
 C12 C13 1.4165(19) . ?
 C13 C14 1.419(2) . ?
 C14 H14 0.9500 . ?
 C14 C15 1.3653(19) . ?
 C15 H15 0.9500 . ?
 C16 H16A 0.9900 . ?
 C16 H16B 0.9900 . ?
 C16 C17 1.5281(19) . ?
 C17 H17A 0.9800 . ?
 C17 H17B 0.9800 . ?
 C17 H17C 0.9800 . ?
 C18 H18A 0.9900 . ?
 C18 H18B 0.9900 . ?
 C18 C19 1.534(2) . ?
 C19 H19A 0.9800 . ?
 C19 H19B 0.9800 . ?
 C19 H19C 0.9800 . ?
 C20 H20A 0.9900 . ?
 C20 H20B 0.9900 . ?
 C20 C21 1.5348(19) . ?
 C21 H21A 0.9800 . ?
 C21 H21B 0.9800 . ?
 C21 H21C 0.9800 . ?

loop_
  _geom_angle_atom_site_label_1
  _geom_angle_atom_site_label_2
  _geom_angle_atom_site_label_3
  _geom_angle
  _geom_angle_site_symmetry_1
  _geom_angle_site_symmetry_3
  _geom_angle_publ_flag
 C16 Si1 C1 110.74(6) . . ?
 C16 Si1 C18 110.55(6) . . ?
 C16 Si1 C20 110.34(6) . . ?
 C18 Si1 C1 107.66(6) . . ?
 C20 Si1 C1 109.16(6) . . ?
 C20 Si1 C18 108.30(6) . . ?
 C1 O1 H1 109.5 . . ?
 O1 C1 Si1 103.96(8) . . ?
 O1 C1 C2 111.31(10) . . ?
 O1 C1 C5 112.55(11) . . ?
 C2 C1 Si1 119.02(9) . . ?
 C5 C1 Si1 109.78(9) . . ?
 C5 C1 C2 100.50(10) . . ?
 C1 C2 H2 105.0 . . ?
 C3 C2 C1 104.62(10) . . ?
 C3 C2 H2 105.0 . . ?
 C6 C2 C1 117.99(10) . . ?
 C6 C2 H2 105.0 . . ?
 C6 C2 C3 117.76(12) . . ?
 C2 C3 H3A 111.4 . . ?
 C2 C3 H3B 111.4 . . ?
 H3A C3 H3B 109.3 . . ?
 C4 C3 C2 101.72(12) . . ?
 C4 C3 H3A 111.4 . . ?
 C4 C3 H3B 111.4 . . ?
 C3 C4 H4 124.1 . . ?
 C5 C4 C3 111.75(12) . . ?
 C5 C4 H4 124.1 . . ?
 C1 C5 H5 123.7 . . ?
 C4 C5 C1 112.58(12) . . ?
 C4 C5 H5 123.7 . . ?
 C7 C6 C2 123.63(12) . . ?
 C7 C6 C15 117.95(12) . . ?
 C15 C6 C2 118.38(12) . . ?
 C6 C7 H7 118.9 . . ?
 C6 C7 C8 122.26(12) . . ?
 C8 C7 H7 118.9 . . ?
 C7 C8 C13 119.15(12) . . ?
 C9 C8 C7 121.74(12) . . ?
 C9 C8 C13 119.11(12) . . ?
 C8 C9 H9 119.6 . . ?
 C10 C9 C8 120.79(13) . . ?
 C10 C9 H9 119.6 . . ?
 C9 C10 H10 119.9 . . ?
 C9 C10 C11 120.16(14) . . ?
 C11 C10 H10 119.9 . . ?
 C10 C11 H11 119.8 . . ?
 C12 C11 C10 120.44(14) . . ?
 C12 C11 H11 119.8 . . ?
 C11 C12 H12 119.5 . . ?
 C11 C12 C13 120.92(14) . . ?
 C13 C12 H12 119.5 . . ?
 C12 C13 C8 118.58(13) . . ?
 C12 C13 C14 123.36(13) . . ?
 C14 C13 C8 118.05(12) . . ?
 C13 C14 H14 119.4 . . ?
 C15 C14 C13 121.11(12) . . ?
 C15 C14 H14 119.4 . . ?
 C6 C15 H15 119.3 . . ?
 C14 C15 C6 121.45(13) . . ?
 C14 C15 H15 119.3 . . ?
 Si1 C16 H16A 108.4 . . ?
 Si1 C16 H16B 108.4 . . ?
 H16A C16 H16B 107.4 . . ?
 C17 C16 Si1 115.68(10) . . ?
 C17 C16 H16A 108.4 . . ?
 C17 C16 H16B 108.4 . . ?
 C16 C17 H17A 109.5 . . ?
 C16 C17 H17B 109.5 . . ?
 C16 C17 H17C 109.5 . . ?
 H17A C17 H17B 109.5 . . ?
 H17A C17 H17C 109.5 . . ?
 H17B C17 H17C 109.5 . . ?
 Si1 C18 H18A 108.0 . . ?
 Si1 C18 H18B 108.0 . . ?
 H18A C18 H18B 107.3 . . ?
 C19 C18 Si1 117.01(10) . . ?
 C19 C18 H18A 108.0 . . ?
 C19 C18 H18B 108.0 . . ?
 C18 C19 H19A 109.5 . . ?
 C18 C19 H19B 109.5 . . ?
 C18 C19 H19C 109.5 . . ?
 H19A C19 H19B 109.5 . . ?
 H19A C19 H19C 109.5 . . ?
 H19B C19 H19C 109.5 . . ?
 Si1 C20 H20A 108.7 . . ?
 Si1 C20 H20B 108.7 . . ?
 H20A C20 H20B 107.6 . . ?
 C21 C20 Si1 114.29(9) . . ?
 C21 C20 H20A 108.7 . . ?
 C21 C20 H20B 108.7 . . ?
 C20 C21 H21A 109.5 . . ?
 C20 C21 H21B 109.5 . . ?
 C20 C21 H21C 109.5 . . ?
 H21A C21 H21B 109.5 . . ?
 H21A C21 H21C 109.5 . . ?
 H21B C21 H21C 109.5 . . ?

loop_
  _geom_torsion_atom_site_label_1
  _geom_torsion_atom_site_label_2
  _geom_torsion_atom_site_label_3
  _geom_torsion_atom_site_label_4
  _geom_torsion
  _geom_torsion_site_symmetry_1
  _geom_torsion_site_symmetry_2
  _geom_torsion_site_symmetry_3
  _geom_torsion_site_symmetry_4
  _geom_torsion_publ_flag
 Si1 C1 C2 C3 -91.98(11) . . . . ?
 Si1 C1 C2 C6 41.15(15) . . . . ?
 Si1 C1 C5 C4 108.59(12) . . . . ?
 O1 C1 C2 C3 147.18(11) . . . . ?
 O1 C1 C2 C6 -79.68(14) . . . . ?
 O1 C1 C5 C4 -136.14(13) . . . . ?
 C1 Si1 C16 C17 -152.54(10) . . . . ?
 C1 Si1 C18 C19 60.73(13) . . . . ?
 C1 Si1 C20 C21 176.91(10) . . . . ?
 C1 C2 C3 C4 -28.21(13) . . . . ?
 C1 C2 C6 C7 -119.12(14) . . . . ?
 C1 C2 C6 C15 63.27(15) . . . . ?
 C2 C1 C5 C4 -17.64(15) . . . . ?
 C2 C3 C4 C5 18.46(16) . . . . ?
 C2 C6 C7 C8 -178.57(12) . . . . ?
 C2 C6 C15 C14 179.61(12) . . . . ?
 C3 C2 C6 C7 7.95(18) . . . . ?
 C3 C2 C6 C15 -169.66(11) . . . . ?
 C3 C4 C5 C1 -0.30(17) . . . . ?
 C5 C1 C2 C3 27.78(13) . . . . ?
 C5 C1 C2 C6 160.92(11) . . . . ?
 C6 C2 C3 C4 -161.47(11) . . . . ?
 C6 C7 C8 C9 179.27(12) . . . . ?
 C6 C7 C8 C13 -0.57(19) . . . . ?
 C7 C6 C15 C14 1.87(19) . . . . ?
 C7 C8 C9 C10 179.16(13) . . . . ?
 C7 C8 C13 C12 -179.57(12) . . . . ?
 C7 C8 C13 C14 1.24(18) . . . . ?
 C8 C9 C10 C11 0.6(2) . . . . ?
 C8 C13 C14 C15 -0.36(19) . . . . ?
 C9 C8 C13 C12 0.58(18) . . . . ?
 C9 C8 C13 C14 -178.61(12) . . . . ?
 C9 C10 C11 C12 0.2(2) . . . . ?
 C10 C11 C12 C13 -0.6(2) . . . . ?
 C11 C12 C13 C8 0.2(2) . . . . ?
 C11 C12 C13 C14 179.36(13) . . . . ?
 C12 C13 C14 C15 -179.51(13) . . . . ?
 C13 C8 C9 C10 -1.0(2) . . . . ?
 C13 C14 C15 C6 -1.2(2) . . . . ?
 C15 C6 C7 C8 -0.96(18) . . . . ?
 C16 Si1 C1 O1 52.16(10) . . . . ?
 C16 Si1 C1 C2 -72.33(11) . . . . ?
 C16 Si1 C1 C5 172.77(9) . . . . ?
 C16 Si1 C18 C19 -60.36(13) . . . . ?
 C16 Si1 C20 C21 -61.17(12) . . . . ?
 C18 Si1 C1 O1 -68.81(9) . . . . ?
 C18 Si1 C1 C2 166.71(10) . . . . ?
 C18 Si1 C1 C5 51.80(11) . . . . ?
 C18 Si1 C16 C17 -33.30(13) . . . . ?
 C18 Si1 C20 C21 59.96(12) . . . . ?
 C20 Si1 C1 O1 173.84(8) . . . . ?
 C20 Si1 C1 C2 49.35(11) . . . . ?
 C20 Si1 C1 C5 -65.55(10) . . . . ?
 C20 Si1 C16 C17 86.47(12) . . . . ?
 C20 Si1 C18 C19 178.64(11) . . . . ?

_contact_Crystallographer_email   staples@chemistry.msu.com
_contact_Crystallographer_name    'Richard Staples'
_journal_coden_cambridge          1078
_journal_name_full                'Private Communication'
_journal_page_first               1
_journal_page_last                2
_journal_volume                   1MSU
_journal_year                     2013
loop_
  _refln_index_h
  _refln_index_k
  _refln_index_l
  _refln_F_squared_meas
  _refln_F_squared_sigma
 1 0 0 265.82 6.55
 2 0 0 516.3 12.67
 3 0 0 324.14 7.95
 3 0 0 320.1 7.74
 4 0 0 41.27 1.12
 4 0 0 42.09 1.18
 5 0 0 2.89 0.22
 5 0 0 2.44 0.23
 5 0 0 2.97 0.2
 6 0 0 17.42 0.68
 7 0 0 98.73 2.78
 -8 0 0 165.6 3.86
 8 0 0 170.71 3.65
 -8 0 0 169.29 3.88
 -8 0 0 169.2 3.99
 -8 0 0 172.99 3.66
 -8 0 0 169.05 5.66
 -8 0 0 168.03 3.81
 8 0 0 163.24 4.63
 -8 0 0 169.15 3.93
 9 0 0 3.2 0.3
 -9 0 0 3.23 0.43
 -9 0 0 3.43 0.39
 -9 0 0 3.18 0.39
 -9 0 0 3.62 0.33
 -9 0 0 3.33 0.39
 -9 0 0 3.31 0.28
 10 0 0 18.77 0.89
 -10 0 0 18.62 0.78
 -10 0 0 18.83 0.71
 -10 0 0 19.19 0.81
 -10 0 0 19.27 0.83
 -10 0 0 19.38 0.53
 -10 0 0 18.76 1.02
 10 0 0 19.66 0.69
 -11 0 0 6.95 0.45
 -11 0 0 8.01 0.46
 -11 0 0 7.74 0.4
 -11 0 0 7.84 0.58
 -11 0 0 6.76 0.46
 0 -1 0 0 0.04
 0 1 0 0.02 0.04
 1 -1 0 961.72 23.74
 -1 1 0 1000 23.11
 2 -1 0 12.01 0.37
 2 -1 0 11.53 0.38
 -2 1 0 9.84 0.33
 2 1 0 11.66 0.34
 3 -1 0 10 0.38
 3 -1 0 10.11 0.35
 -3 1 0 9.94 0.36
 3 1 0 10.04 0.35
 -3 1 0 10.09 0.34
 4 -1 0 12.57 0.44
 4 -1 0 12.96 0.48
 4 -1 0 12.24 0.51
 4 1 0 11.89 0.44
 -4 1 0 11.82 0.44
 5 -1 0 87.2 2.45
 5 -1 0 93.94 2.48
 5 -1 0 91.2 2.38
 5 1 0 86.98 2.36
 -5 1 0 89.01 2.17
 6 -1 0 22.82 0.83
 6 -1 0 21.08 0.83
 6 -1 0 21.18 0.76
 6 -1 0 22.01 0.83
 6 1 0 21.1 0.78
 7 -1 0 8.6 0.51
 7 -1 0 9.11 0.53
 7 -1 0 8 0.38
 7 -1 0 7.92 0.52
 7 1 0 7.92 0.47
 8 -1 0 -0.05 0.17
 -8 -1 0 0.49 0.2
 -8 -1 0 0.29 0.19
 -8 -1 0 0.23 0.13
 -8 -1 0 0.07 0.14
 -8 -1 0 0.2 0.13
 -8 -1 0 0.19 0.19
 8 -1 0 0.37 0.14
 -8 1 0 0.21 0.19
 -8 1 0 0.24 0.2
 8 1 0 0.36 0.17
 -8 1 0 0.17 0.17
 -8 1 0 0.35 0.15
 -8 1 0 0.24 0.16
 -8 1 0 0.37 0.15
 -9 -1 0 1.36 0.23
 -9 -1 0 1.49 0.3
 -9 -1 0 1.08 0.25
 -9 -1 0 1.45 0.28
 -9 -1 0 1.05 0.17
 9 -1 0 1.78 0.25
 -9 -1 0 1 0.23
 -9 1 0 1.27 0.28
 -9 1 0 1.46 0.29
 -9 1 0 0.96 0.24
 -9 1 0 1.88 0.33
 9 1 0 1.45 0.23
 -9 1 0 1.39 0.29
 -9 1 0 1.12 0.2
 -9 1 0 1.59 0.26
 -10 -1 0 4.62 0.41
 -10 -1 0 4.76 0.35
 -10 -1 0 5.09 0.45
 -10 -1 0 4.54 0.49
 10 -1 0 5.29 0.33
 -10 -1 0 4.7 0.42
 -10 1 0 5.28 0.38
 10 1 0 4.85 0.34
 -10 1 0 4.89 0.53
 -10 1 0 4.23 0.4
 -10 1 0 5.1 0.28
 -10 1 0 4.95 0.41
 -10 1 0 5.15 0.47
 -11 -1 0 11.16 0.47
 11 -1 0 11.75 0.62
 11 -1 0 11.04 0.79
 11 -1 0 11.05 0.46
 -11 -1 0 11.38 0.54
 -11 -1 0 10.97 0.55
 -11 -1 0 11.24 0.57
 -11 -1 0 11.69 0.7
 11 -1 0 11.24 0.6
 -11 1 0 11.55 0.55
 -11 1 0 11.55 0.58
 -11 1 0 11.74 0.54
 -11 1 0 11.15 0.5
 -11 1 0 11.72 0.72
 0 -2 0 14.89 0.48
 0 2 0 17.25 0.54
 1 -2 0 57.26 1.52
 1 -2 0 56.1 1.47
 -1 2 0 62.76 1.61
 1 2 0 63.77 1.58
 2 -2 0 31.43 0.91
 2 -2 0 30.81 0.88
 -2 2 0 33.32 0.96
 -2 2 0 32.15 0.89
 -2 2 0 34.38 0.93
 2 2 0 33.01 0.88
 3 -2 0 3.42 0.23
 3 -2 0 3.27 0.25
 3 -2 0 3.15 0.2
 3 2 0 3.61 0.17
 -3 2 0 3.28 0.22
 -3 2 0 3.11 0.22
 4 -2 0 10.32 0.42
 4 -2 0 10.2 0.49
 4 -2 0 10.02 0.45
 4 -2 0 10.17 0.42
 -4 2 0 10.48 0.44
 -4 2 0 9.16 0.4
 5 -2 0 0.91 0.17
 5 -2 0 0.99 0.19
 5 -2 0 0.73 0.18
 5 -2 0 1.09 0.17
 5 -2 0 1.25 0.2
 5 -2 0 1.05 0.17
 -5 2 0 0.91 0.17
 6 -2 0 57.35 1.7
 6 -2 0 56.76 1.36
 6 -2 0 57.57 1.76
 6 -2 0 57.92 1.67
 6 -2 0 56.06 1.77
 -6 2 0 57.41 1.61
 7 -2 0 2.67 0.34
 7 -2 0 2.72 0.24
 7 -2 0 2.71 0.32
 7 -2 0 2.56 0.33
 7 -2 0 2.39 0.32
 -7 2 0 2.38 0.34
 -7 2 0 2.44 0.28
 8 -2 0 20.21 0.68
 -8 -2 0 19.39 1.03
 8 -2 0 19.49 0.95
 -8 -2 0 20.59 0.84
 -8 -2 0 19.07 0.64
 8 -2 0 20.66 0.91
 8 -2 0 20.57 0.85
 -8 -2 0 20.08 0.85
 -8 -2 0 20.79 0.84
 -8 -2 0 20.49 0.73
 -8 2 0 19.96 0.82
 -8 2 0 20.38 1.09
 -8 2 0 20.27 0.88
 8 2 0 20.78 0.7
 -8 2 0 19.93 0.78
 -8 2 0 20.44 0.75
 -8 2 0 20.2 0.84
 9 -2 0 27.95 0.85
 -9 -2 0 25.24 0.96
 -9 -2 0 28.26 1.01
 -9 -2 0 26.76 1.29
 -9 -2 0 27.55 0.9
 -9 -2 0 26.69 0.73
 -9 -2 0 27.97 1.03
 9 -2 0 27.6 1.12
 -9 2 0 28.11 0.89
 -9 2 0 27.85 1.38
 9 2 0 28.08 0.87
 -9 2 0 29.79 1.04
 -9 2 0 27.82 0.97
 -9 2 0 27.05 1.06
 -9 2 0 27.32 1.01
 -10 -2 0 11.59 0.62
 10 -2 0 10.84 0.85
 10 -2 0 11.47 0.67
 10 -2 0 10.7 0.47
 -10 -2 0 10.11 0.57
 -10 -2 0 12.06 0.52
 -10 -2 0 10.73 0.58
 -10 -2 0 10.04 0.7
 -10 2 0 10.4 0.43
 -10 2 0 11.4 0.77
 -10 2 0 11.31 0.61
 -10 2 0 11.3 0.58
 -10 2 0 12.14 0.6
 -10 2 0 10.23 0.53
 11 -2 0 0.12 0.17
 11 -2 0 0.11 0.13
 11 -2 0 -0.13 0.16
 11 -2 0 0.09 0.15
 -11 -2 0 0.2 0.11
 -11 -2 0 0.03 0.1
 -11 -2 0 0.12 0.15
 -11 -2 0 0.13 0.14
 -11 2 0 0.15 0.13
 -11 2 0 -0.01 0.12
 -11 2 0 -0.15 0.13
 -11 2 0 -0.02 0.13
 -11 2 0 -0.07 0.13
 0 -3 0 -0.1 0.08
 0 3 0 0.55 0.14
 1 -3 0 108.14 2.74
 1 -3 0 113.96 2.85
 1 -3 0 101.97 2.77
 -1 3 0 118.93 2.91
 1 3 0 117.87 2.88
 -1 3 0 112.4 2.72
 2 -3 0 11.74 0.46
 2 -3 0 11.03 0.49
 2 -3 0 12.16 0.46
 2 -3 0 12.87 0.5
 -2 3 0 12.93 0.52
 -2 3 0 12.28 0.48
 2 3 0 13.16 0.47
 3 -3 0 4.91 0.3
 3 -3 0 4.99 0.32
 3 -3 0 4.53 0.28
 3 -3 0 4.65 0.32
 3 3 0 4.92 0.26
 -3 3 0 4.87 0.31
 -3 3 0 5.26 0.32
 4 -3 0 119.89 3.22
 4 -3 0 118.73 2.83
 4 -3 0 115.2 3.18
 4 -3 0 124.49 3.12
 4 -3 0 115.74 2.74
 -4 3 0 126.32 3.2
 -4 3 0 126.87 3.09
 5 -3 0 0.03 0.13
 5 -3 0 0.13 0.12
 5 -3 0 0.07 0.12
 5 -3 0 0.06 0.09
 5 -3 0 -0.01 0.11
 5 -3 0 -0.15 0.08
 5 -3 0 0.04 0.13
 -5 3 0 0.02 0.11
 6 -3 0 1.41 0.24
 6 -3 0 1.92 0.33
 6 -3 0 1.94 0.28
 6 -3 0 1.72 0.31
 6 -3 0 1.82 0.28
 6 -3 0 1.59 0.25
 6 -3 0 1.4 0.19
 6 -3 0 1.38 0.24
 6 -3 0 1.82 0.27
 -6 3 0 1.96 0.27
 7 -3 0 22.64 1.01
 7 -3 0 21.32 0.97
 -7 -3 0 22.34 1.1
 7 -3 0 22.43 0.71
 7 -3 0 22.23 0.95
 7 -3 0 22.62 0.87
 -7 -3 0 20.92 0.68
 -7 -3 0 22.85 0.78
 -7 -3 0 21.2 0.87
 -7 -3 0 22.46 0.88
 -7 -3 0 22.61 0.88
 -7 3 0 23.8 0.92
 -7 3 0 27.5 1.23
 -7 3 0 22.8 0.95
 -7 3 0 22.16 0.88
 -7 3 0 22.71 0.91
 -7 3 0 21.43 0.63
 -7 3 0 22.66 0.83
 8 -3 0 1.35 0.25
 8 -3 0 1.3 0.32
 -8 -3 0 1.77 0.33
 -8 -3 0 1.4 0.23
 -8 -3 0 1.59 0.33
 -8 -3 0 1.58 0.29
 -8 -3 0 1.2 0.17
 8 -3 0 1.47 0.22
 -8 -3 0 1.49 0.29
 8 -3 0 1.81 0.33
 -8 3 0 1.86 0.28
 -8 3 0 1.15 0.28
 -8 3 0 2.45 0.44
 -8 3 0 1.14 0.25
 -8 3 0 1.32 0.25
 -8 3 0 1.66 0.29
 9 -3 0 3.07 0.54
 9 -3 0 3.28 0.43
 9 -3 0 3.42 0.29
 -9 -3 0 3.14 0.41
 9 -3 0 2.88 0.41
 -9 -3 0 2.93 0.37
 -9 -3 0 3.23 0.37
 -9 -3 0 3.35 0.31
 -9 -3 0 3.35 0.39
 -9 3 0 3.25 0.35
 -9 3 0 3.3 0.38
 -9 3 0 3.92 0.34
 -9 3 0 3.14 0.38
 -9 3 0 2.95 0.38
 -9 3 0 3.38 0.53
 -10 -3 0 0.27 0.13
 -10 -3 0 0.27 0.17
 10 -3 0 0.19 0.18
 10 -3 0 0.28 0.24
 10 -3 0 0.51 0.22
 -10 -3 0 0.26 0.15
 -10 -3 0 0.61 0.2
 10 -3 0 0.16 0.14
 -10 3 0 0.45 0.18
 -10 3 0 0.39 0.18
 -10 3 0 0.24 0.13
 -10 3 0 0.34 0.19
 -10 3 0 0.5 0.17
 -10 3 0 0.42 0.2
 -10 3 0 0.34 0.18
 -11 -3 0 0.16 0.11
 11 -3 0 0.19 0.16
 11 -3 0 0.29 0.16
 -11 -3 0 0.21 0.1
 11 -3 0 0.15 0.13
 -11 -3 0 0.1 0.13
 -11 -3 0 0.16 0.14
 -11 3 0 0.22 0.14
 -11 3 0 0.48 0.14
 -11 3 0 0.21 0.12
 -11 3 0 0.19 0.14
 -11 3 0 0.05 0.14
 0 -4 0 89.84 2.16
 0 4 0 104.58 2.52
 0 4 0 106.14 2.73
 -1 -4 0 44.27 1.18
 1 -4 0 43.03 1.21
 1 -4 0 45.11 1.32
 1 -4 0 45.06 1.24
 -1 4 0 50.82 1.48
 1 4 0 50.69 1.45
 -1 4 0 50.47 1.36
 2 -4 0 61.68 1.57
 2 -4 0 62 1.79
 2 -4 0 61.39 1.61
 2 4 0 69.47 1.87
 -2 4 0 68.29 1.81
 -2 4 0 69.63 1.94
 3 -4 0 0.19 0.11
 3 -4 0 0.17 0.13
 3 -4 0 0.12 0.1
 3 -4 0 0.26 0.14
 3 -4 0 0.12 0.12
 3 -4 0 0.35 0.16
 -3 4 0 0.26 0.17
 3 4 0 0.08 0.1
 -3 4 0 0.05 0.12
 4 -4 0 7.95 0.43
 4 -4 0 7.77 0.48
 4 -4 0 8.17 0.45
 4 -4 0 7.97 0.34
 4 -4 0 9.27 0.53
 4 -4 0 8.33 0.46
 -4 4 0 8.64 0.49
 -4 4 0 8.61 0.48
 5 -4 0 2.39 0.34
 5 -4 0 1.88 0.2
 5 -4 0 2.14 0.27
 5 -4 0 1.69 0.27
 5 -4 0 2.79 0.32
 5 -4 0 2.41 0.32
 5 -4 0 2.07 0.28
 5 -4 0 2.27 0.27
 -5 4 0 2.66 0.3
 6 -4 0 12.91 0.6
 6 -4 0 13.38 0.7
 6 -4 0 13.59 0.64
 -6 -4 0 12.89 0.52
 6 -4 0 12.72 0.69
 6 -4 0 11.97 0.72
 6 -4 0 12.27 0.6
 6 -4 0 12.15 0.65
 6 -4 0 12.6 0.49
 -6 4 0 14.05 0.7
 -6 4 0 13.28 0.57
 -6 4 0 13.2 0.68
 -7 -4 0 1.72 0.23
 7 -4 0 1.83 0.35
 -7 -4 0 1.35 0.26
 7 -4 0 1.9 0.29
 7 -4 0 1.46 0.27
 7 -4 0 1.58 0.28
 7 -4 0 2.23 0.51
 -7 -4 0 2.09 0.37
 7 -4 0 2.11 0.35
 7 -4 0 2.09 0.37
 7 -4 0 1.89 0.23
 -7 -4 0 1.66 0.28
 -7 -4 0 1.77 0.26
 -7 4 0 2.1 0.21
 -7 4 0 1.83 0.31
 -7 4 0 1.29 0.29
 -7 4 0 1.27 0.29
 -7 4 0 1.63 0.29
 -7 4 0 2.18 0.33
 -7 4 0 1.93 0.31
 8 -4 0 62.03 2.49
 -8 -4 0 58.03 1.69
 8 -4 0 60.75 1.89
 8 -4 0 58.85 1.91
 -8 -4 0 58.54 1.71
 8 -4 0 60.2 1.5
 -8 -4 0 60.29 2.36
 -8 -4 0 62.88 1.44
 8 -4 0 60.84 2.05
 -8 -4 0 60.6 1.62
 -8 4 0 59.54 1.69
 -8 4 0 60.74 1.69
 -8 4 0 62.51 1.67
 -8 4 0 63.77 1.83
 -9 -4 0 2.62 0.38
 -9 -4 0 2.97 0.35
 9 -4 0 2.74 0.47
 9 -4 0 3.04 0.37
 9 -4 0 3.02 0.42
 -9 -4 0 3.13 0.37
 -9 -4 0 2.99 0.28
 9 -4 0 2.91 0.26
 -9 4 0 2.52 0.36
 -9 4 0 3.44 0.35
 -9 4 0 3.15 0.38
 -9 4 0 2.41 0.31
 -9 4 0 2.96 0.35
 10 -4 0 1.89 0.23
 10 -4 0 2.34 0.39
 10 -4 0 2.49 0.35
 -10 -4 0 1.87 0.28
 -10 -4 0 2.12 0.31
 -10 -4 0 2.67 0.24
 -10 -4 0 2.3 0.34
 10 -4 0 2.06 0.29
 -10 4 0 2.2 0.22
 -10 4 0 2.3 0.27
 -10 4 0 2.87 0.33
 -10 4 0 2.46 0.3
 0 -5 0 0.23 0.13
 0 -5 0 0.02 0.09
 0 5 0 0.02 0.13
 1 -5 0 145.45 3.35
 1 -5 0 144.92 3.45
 -1 5 0 154.74 4.03
 -1 5 0 161.47 3.76
 1 5 0 154.35 4
 2 -5 0 1.45 0.24
 2 -5 0 1.26 0.22
 2 -5 0 1.41 0.26
 2 -5 0 0.99 0.24
 -2 5 0 1.56 0.27
 2 5 0 1.55 0.25
 -2 5 0 1.24 0.22
 3 -5 0 47.28 1.44
 3 -5 0 45.6 1.11
 3 -5 0 42.07 1.33
 3 -5 0 44.88 1.36
 3 -5 0 45.93 1.49
 3 -5 0 45.68 1.33
 3 -5 0 46.17 1.52
 -3 5 0 49 1.59
 -3 5 0 49.02 1.48
 4 -5 0 0.53 0.21
 4 -5 0 0.65 0.19
 4 -5 0 0.44 0.21
 4 -5 0 0.45 0.13
 4 -5 0 0.43 0.16
 4 -5 0 0.33 0.16
 4 -5 0 0.38 0.19
 -4 5 0 0.42 0.18
 -4 5 0 0.48 0.21
 -4 5 0 0.47 0.23
 5 -5 0 10.77 0.57
 5 -5 0 11.03 0.44
 5 -5 0 10.46 0.63
 -5 -5 0 11.31 0.75
 -5 -5 0 10.49 0.51
 5 -5 0 10.17 0.76
 5 -5 0 10.56 0.64
 5 -5 0 10.93 0.67
 -5 -5 0 10.9 0.58
 5 -5 0 10.47 0.6
 -5 -5 0 11.4 0.61
 5 -5 0 11.37 0.55
 -5 -5 0 10.61 0.54
 -5 5 0 10.9 0.47
 -5 5 0 10.48 0.63
 -5 5 0 10.45 0.56
 -5 5 0 10.57 0.61
 6 -5 0 8.31 0.54
 6 -5 0 7.54 0.47
 -6 -5 0 7.49 0.42
 6 -5 0 8.39 0.7
 -6 -5 0 7.73 1.38
 -6 -5 0 7.66 0.51
 -6 -5 0 7.67 0.63
 6 -5 0 7.67 0.61
 -6 -5 0 7.93 0.52
 6 -5 0 8.11 0.39
 -6 -5 0 7.91 0.47
 6 -5 0 8.36 0.59
 6 -5 0 7.36 0.56
 6 -5 0 7.96 0.52
 -6 5 0 8.08 0.54
 -6 5 0 7.36 0.54
 -6 5 0 7.04 0.51
 -6 5 0 7.27 0.44
 7 -5 0 15.32 0.81
 7 -5 0 16.24 0.58
 -7 -5 0 15.29 1.83
 7 -5 0 15.65 0.73
 -7 -5 0 15.45 0.93
 -7 -5 0 14.96 0.56
 -7 -5 0 15.69 0.72
 7 -5 0 14.64 0.85
 7 -5 0 15.51 0.81
 7 -5 0 16.09 0.73
 7 -5 0 14.71 0.95
 7 -5 0 14.34 0.71
 -7 -5 0 15.22 0.72
 -7 -5 0 16.43 0.67
 -7 5 0 14.99 0.78
 -7 5 0 17.54 0.82
 -7 5 0 16.42 0.54
 -7 5 0 16.38 0.72
 -7 5 0 15.25 0.79
 -8 -5 0 0.21 0.18
 -8 -5 0 0.04 0.08
 8 -5 0 0.04 0.21
 8 -5 0 -0.02 0.21
 8 -5 0 0.17 0.15
 8 -5 0 -0.12 0.13
 -8 -5 0 -0.13 0.11
 -8 -5 0 0.05 0.12
 8 -5 0 -0.03 0.16
 -8 -5 0 0.06 0.16
 -8 5 0 0.21 0.2
 -8 5 0 0.05 0.17
 -8 5 0 -0.06 0.16
 -9 -5 0 8.9 0.44
 9 -5 0 8.37 0.58
 -9 -5 0 8.99 0.51
 9 -5 0 8.17 0.61
 9 -5 0 9.09 0.49
 -9 -5 0 8.82 0.63
 -9 -5 0 8.6 0.47
 -9 5 0 9.22 0.45
 -9 5 0 7.47 0.46
 -9 5 0 8.71 0.52
 -10 -5 0 0.07 0.11
 10 -5 0 0.02 0.11
 10 -5 0 0.1 0.14
 -10 -5 0 0.1 0.12
 10 -5 0 -0.03 0.09
 -10 -5 0 0.02 0.09
 -10 -5 0 0.03 0.09
 -10 5 0 -0.19 0.12
 10 5 0 0.31 0.15
 -10 5 0 -0.04 0.08
 10 5 0 0.1 0.15
 0 -6 0 117.44 2.83
 0 -6 0 117.08 2.92
 0 6 0 124.57 3.33
 0 6 0 118.42 3.05
 1 -6 0 0.56 0.19
 1 -6 0 0.74 0.2
 1 -6 0 0.72 0.26
 1 6 0 0.53 0.2
 -1 6 0 0.75 0.23
 -1 6 0 0.63 0.23
 2 -6 0 93.79 2.36
 2 -6 0 90.16 2.62
 2 -6 0 93.09 2.44
 2 6 0 93 2.67
 -2 6 0 96.79 2.47
 -2 6 0 94.19 3.43
 -2 6 0 96.33 2.74
 -2 6 0 93.97 2.52
 -3 -6 0 51.37 1.28
 -3 -6 0 50.4 1.49
 3 -6 0 51.53 1.73
 -3 -6 0 51.2 1.43
 -3 -6 0 50.38 1.46
 3 -6 0 52.37 1.51
 3 -6 0 50.6 1.69
 3 -6 0 51.88 1.56
 3 -6 0 47.85 1.95
 -3 6 0 56.38 1.67
 -3 6 0 53.37 1.59
 -3 6 0 54 1.48
 -3 6 0 50.76 1.76
 4 -6 0 12.87 0.76
 4 -6 0 13.75 0.67
 4 -6 0 13.99 0.7
 4 -6 0 13.87 0.73
 -4 -6 0 12.93 0.85
 -4 -6 0 12.52 0.63
 4 -6 0 11.92 0.78
 -4 -6 0 12.94 0.59
 -4 -6 0 13.35 1.66
 -4 -6 0 14 0.66
 -4 -6 0 12.1 0.62
 4 -6 0 13.14 0.75
 -4 6 0 13 0.69
 -4 6 0 12.82 0.75
 -4 6 0 14.65 0.72
 -4 6 0 13.43 0.67
 -4 6 0 13.56 0.57
 -4 6 0 13.51 0.68
 -5 -6 0 53.14 1.54
 5 -6 0 54.25 1.6
 -5 -6 0 54.84 2.2
 5 -6 0 54.38 1.65
 -5 -6 0 52.01 3.78
 -5 -6 0 53.21 1.56
 -5 -6 0 52.77 1.52
 5 -6 0 52.31 1.61
 5 -6 0 52.78 1.73
 5 -6 0 52.42 2.12
 5 -6 0 54.93 1.87
 -5 -6 0 54.2 1.43
 5 -6 0 53.06 1.77
 -5 6 0 58.64 1.78
 -5 6 0 56.44 1.71
 -5 6 0 55.38 1.61
 -5 6 0 58.32 1.6
 -5 6 0 53.58 1.38
 -6 -6 0 14.92 0.71
 -6 -6 0 13.51 1.77
 6 -6 0 14.52 0.67
 6 -6 0 15.23 0.85
 6 -6 0 14.72 0.78
 6 -6 0 15.59 0.73
 -6 -6 0 15.46 0.67
 -6 -6 0 15.51 0.59
 6 -6 0 15.67 0.82
 6 -6 0 15.04 0.89
 -6 -6 0 15.62 0.7
 6 -6 0 15.04 0.75
 -6 -6 0 15.68 0.94
 -6 6 0 15.59 0.79
 -6 6 0 15.51 0.7
 -6 6 0 15.21 0.75
 -6 6 0 15.36 0.63
 -7 -6 0 2.81 0.3
 -7 -6 0 3.03 0.35
 -7 -6 0 2.58 0.42
 7 -6 0 2.86 0.41
 7 -6 0 3.14 0.41
 7 -6 0 2.54 0.4
 -7 -6 0 2.88 0.24
 -7 -6 0 3.02 0.36
 7 -6 0 3.09 0.33
 7 -6 0 2.36 0.35
 7 -6 0 3.06 0.37
 -7 6 0 2.57 0.38
 -7 6 0 2.68 0.18
 -7 6 0 2.59 0.36
 8 -6 0 19.16 0.86
 -8 -6 0 20.58 0.76
 8 -6 0 19.63 0.72
 -8 -6 0 19.42 0.74
 -8 -6 0 19 1.78
 8 -6 0 19.77 0.94
 -8 -6 0 21 0.72
 -8 -6 0 19.99 1.02
 8 -6 0 18.5 0.87
 -8 6 0 19.7 0.72
 8 6 0 18.83 0.83
 8 6 0 18.3 1.04
 -8 6 0 18.49 0.77
 -9 -6 0 0.05 0.13
 -9 -6 0 0.31 0.12
 9 -6 0 0.19 0.1
 9 -6 0 0.25 0.11
 -9 -6 0 0.17 0.13
 9 -6 0 0.44 0.18
 -9 -6 0 0.15 0.11
 9 6 0 0.16 0.15
 -9 6 0 0.08 0.16
 9 6 0 0.3 0.14
 -9 6 0 -0.11 0.1
 0 -7 0 -0.08 0.17
 0 -7 0 0.04 0.13
 0 7 0 0.17 0.15
 0 7 0 -0.04 0.16
 0 7 0 0.07 0.17
 0 7 0 -0.07 0.16
 1 -7 0 52.07 1.65
 1 -7 0 48.94 1.46
 -1 -7 0 48.14 1.45
 1 -7 0 47.64 1.42
 1 -7 0 46.63 1.28
 -1 -7 0 46.51 1.32
 1 -7 0 46.22 1.5
 1 7 0 49.96 2.07
 -1 7 0 51.55 1.48
 -1 7 0 49.07 1.48
 1 7 0 49.43 1.53
 -1 7 0 47.68 1.52
 -1 7 0 46.02 1.94
 -1 7 0 47.14 1.49
 1 7 0 50.77 1.48
 1 7 0 49.86 1.58
 -2 7 0 0.71 0.25
 -2 7 0 0.86 0.25
 2 7 0 0.45 0.19
 2 7 0 0.5 0.21
 2 7 0 0.24 0.21
 -2 7 0 0.36 0.23
 -3 -7 0 13.14 1.55
 3 -7 0 12.68 0.73
 3 -7 0 10.98 0.64
 -3 -7 0 10.87 0.34
 -3 -7 0 10.84 0.6
 3 -7 0 10 0.54
 3 -7 0 10.62 0.61
 -3 -7 0 9.76 0.55
 3 7 0 11.44 0.66
 -3 7 0 10.85 0.55
 -3 7 0 10.67 0.65
 -3 7 0 11.86 0.67
 3 7 0 12.09 0.64
 3 7 0 11.28 0.85
 -3 7 0 11.01 0.61
 -3 7 0 10.47 0.63
 3 7 0 11.81 0.63
 -4 -7 0 44.41 1.38
 4 -7 0 43.61 1.45
 -4 -7 0 45.28 1.28
 4 -7 0 45.89 1.33
 4 -7 0 44.45 1.41
 -4 -7 0 44.66 3.38
 4 -7 0 45.47 1.57
 -4 -7 0 44.9 1.95
 4 7 0 46.85 2.06
 4 7 0 46.82 1.43
 -4 7 0 47.84 1.42
 -4 7 0 47.67 1.5
 -4 7 0 46.15 1.26
 -4 7 0 46.71 1.54
 4 7 0 47.1 1.58
 -5 -7 0 4.44 0.31
 -5 -7 0 3.99 0.52
 5 -7 0 3.98 0.38
 5 -7 0 4.31 0.42
 5 -7 0 4.49 0.41
 5 -7 0 4.3 0.46
 -5 -7 0 4.36 0.33
 -5 -7 0 4.06 1.09
 -5 -7 0 3.95 0.4
 -5 -7 0 3.71 0.36
 -5 7 0 4.11 0.42
 -5 7 0 4.24 0.38
 5 7 0 4.13 0.57
 5 7 0 5.36 0.47
 5 7 0 4.41 0.41
 -6 -7 0 4.62 1.05
 6 -7 0 4.16 0.42
 -6 -7 0 5.14 0.52
 6 -7 0 4.87 0.41
 -6 -7 0 4.89 0.41
 -6 -7 0 4.96 0.38
 -6 -7 0 4.65 0.31
 6 -7 0 5.08 0.48
 6 -7 0 4.26 0.46
 6 -7 0 4.43 0.4
 6 7 0 5.93 0.47
 6 7 0 4.38 0.57
 6 7 0 5.6 0.43
 -6 7 0 5.08 0.32
 -6 7 0 5.62 0.45
 -7 -7 0 14.85 0.62
 7 -7 0 13.97 0.71
 7 -7 0 13.28 0.59
 -7 -7 0 14.08 0.58
 -7 -7 0 14.65 0.84
 -7 -7 0 14.26 0.37
 -7 -7 0 13.83 1.51
 7 7 0 14.83 0.68
 7 7 0 15.01 0.89
 -7 7 0 14.52 0.66
 7 7 0 14.23 0.61
 -8 -7 0 1.34 0.27
 -8 -7 0 1.25 0.19
 8 -7 0 1.78 0.24
 -8 -7 0 1.45 0.2
 8 7 0 1.3 0.2
 8 7 0 1.9 0.31
 8 7 0 1.7 0.25
 -8 7 0 1.68 0.23
 -8 7 0 1.67 0.25
 0 -8 0 34.18 1.04
 0 -8 0 35.04 1.3
 0 8 0 37.85 1.19
 0 8 0 36.28 1.26
 0 8 0 37.67 1.22
 0 8 0 36.89 1.19
 0 8 0 38.15 1.56
 1 -8 0 1.53 0.25
 1 -8 0 1.21 0.19
 -1 -8 0 1.57 0.24
 -1 -8 0 0.79 0.27
 1 8 0 0.85 0.23
 1 8 0 1 0.21
 1 8 0 0.96 0.25
 -1 8 0 1.02 0.25
 1 8 0 0.81 0.25
 -1 8 0 1.54 0.3
 -1 8 0 0.82 0.25
 2 8 0 -0.05 0.15
 -2 8 0 0.02 0.15
 2 8 0 0.09 0.17
 2 8 0 -0.1 0.14
 -2 8 0 -0.05 0.17
 -2 8 0 0.08 0.24
 2 8 0 0.1 0.19
 -3 -8 0 2.07 0.32
 3 -8 0 2.5 0.35
 -3 -8 0 1.22 0.41
 3 -8 0 2.46 0.26
 -3 -8 0 2.44 0.3
 3 -8 0 1.84 0.34
 3 -8 0 2.36 0.35
 3 -8 0 2.34 0.36
 -3 -8 0 1.9 0.3
 -3 8 0 2.59 0.28
 3 8 0 2.18 0.33
 3 8 0 2.52 0.41
 -3 8 0 2.44 0.35
 3 8 0 2.19 0.33
 3 8 0 3.02 0.38
 -3 8 0 2.67 0.38
 -4 -8 0 0.26 0.17
 4 -8 0 -0.06 0.13
 -4 -8 0 -0.05 0.17
 4 -8 0 0.05 0.17
 -4 -8 0 0.01 0.13
 4 -8 0 -0.04 0.2
 -4 -8 0 0.19 0.14
 4 -8 0 0.08 0.19
 4 8 0 0.22 0.19
 -4 8 0 -0.13 0.15
 4 8 0 0.1 0.17
 4 8 0 0.17 0.17
 -4 8 0 -0.03 0.17
 -4 8 0 0.12 0.11
 4 8 0 -0.05 0.14
 -5 -8 0 0.1 0.17
 -5 -8 0 0.43 0.13
 -5 -8 0 0.52 0.18
 5 -8 0 0.11 0.19
 5 -8 0 0.2 0.15
 5 -8 0 0.7 0.24
 -5 8 0 0.65 0.16
 5 8 0 0.53 0.19
 5 8 0 0.41 0.19
 5 8 0 0.37 0.16
 -5 8 0 0.58 0.2
 6 -8 0 7.37 0.35
 -6 -8 0 7.49 0.41
 -6 -8 0 6.77 0.24
 6 -8 0 7.18 0.45
 -6 -8 0 6.35 0.99
 6 -8 0 7.28 0.48
 6 8 0 7.8 0.41
 -6 8 0 7.54 0.46
 6 8 0 7.76 0.43
 6 8 0 7.51 0.55
 0 -9 0 0.32 0.17
 0 -9 0 0.11 0.2
 0 9 0 0.04 0.15
 0 9 0 0.1 0.17
 -1 -9 0 1.07 0.18
 1 -9 0 1.11 0.16
 1 -9 0 1.1 0.22
 -1 -9 0 1.05 0.24
 1 -9 0 0.86 0.25
 -1 -9 0 0.9 0.22
 -1 9 0 1.25 0.24
 -1 9 0 1.06 0.19
 1 9 0 1 0.22
 -1 9 0 1.59 0.29
 1 9 0 0.75 0.22
 -2 9 0 0.15 0.12
 -2 9 0 0.28 0.19
 2 9 0 0.22 0.13
 2 9 0 0.14 0.18
 -2 9 0 0.13 0.16
 2 9 0 0.12 0.1
 2 9 0 0.3 0.17
 3 -9 0 1.82 0.24
 -3 -9 0 0.96 0.32
 -3 -9 0 1.91 0.2
 3 -9 0 1.45 0.25
 -3 -9 0 2.08 0.25
 3 -9 0 1.83 0.28
 3 9 0 2.23 0.29
 3 9 0 1.82 0.22
 3 9 0 2.18 0.3
 -3 9 0 2.09 0.3
 3 9 0 2.1 0.28
 -3 9 0 2.03 0.29
 4 -9 0 0.12 0.16
 4 -9 0 0.13 0.13
 -4 -9 0 -0.16 0.15
 -4 -9 0 0.05 0.09
 -4 9 0 0.05 0.11
 4 9 0 0.02 0.1
 4 9 0 0 0.13
 -4 9 0 0 0.13
 4 9 0 -0.02 0.09
 -11 0 1 0.01 0.16
 -11 0 1 -0.23 0.13
 11 0 -1 0.15 0.13
 -11 0 1 0.01 0.11
 -11 0 1 0.07 0.11
 -11 0 1 0.07 0.16
 -10 0 1 0.02 0.1
 -10 0 1 -0.03 0.17
 -10 0 1 0.18 0.21
 -10 0 1 -0.07 0.12
 10 0 -1 0.11 0.13
 -10 0 1 0.09 0.16
 -9 0 1 -0.04 0.16
 -9 0 1 0.04 0.13
 -9 0 1 0 0.1
 9 0 -1 0.11 0.15
 -9 0 1 0.05 0.13
 -9 0 1 0.26 0.19
 -9 0 1 -0.12 0.16
 -8 0 1 0.12 0.12
 -8 0 1 -0.16 0.17
 -8 0 1 0.21 0.17
 -8 0 1 0.37 0.2
 -8 0 1 0.06 0.16
 -8 0 1 0.01 0.12
 -8 0 1 0.05 0.11
 7 0 -1 0.15 0.12
 6 0 -1 0.03 0.1
 6 0 -1 0.06 0.09
 5 0 -1 0.01 0.06
 5 0 -1 0 0.07
 5 0 -1 -0.02 0.1
 4 0 -1 0.02 0.05
 4 0 -1 0.02 0.06
 3 0 -1 0.06 0.04
 3 0 -1 -0.01 0.03
 -3 0 1 0.02 0.04
 3 0 -1 0.04 0.04
 2 0 -1 0.02 0.02
 2 0 -1 0.02 0.02
 0 0 -1 0 0.02
 1 0 1 -0.06 0.03
 2 0 1 0 0.05
 2 0 1 0.02 0.05
 3 0 1 0.08 0.07
 3 0 1 0.15 0.07
 4 0 1 0.13 0.09
 4 0 1 -0.12 0.07
 5 0 1 0.13 0.1
 5 0 1 -0.04 0.09
 6 0 1 0.01 0.1
 7 0 1 0.15 0.11
 7 0 1 0.09 0.13
 -8 0 -1 0.15 0.18
 -8 0 -1 0.08 0.13
 -8 0 -1 0.32 0.15
 -8 0 -1 0.11 0.13
 -8 0 -1 0.58 0.21
 -8 0 -1 0.09 0.17
 8 0 1 0.19 0.13
 -8 0 -1 0.11 0.18
 -9 0 -1 0.06 0.18
 -9 0 -1 -0.11 0.11
 -9 0 -1 0.2 0.17
 -9 0 -1 0.13 0.14
 9 0 1 -0.15 0.12
 -9 0 -1 0.08 0.15
 -9 0 -1 -0.03 0.16
 10 0 1 0.22 0.22
 10 0 1 0.16 0.13
 -10 0 -1 0.1 0.18
 -10 0 -1 -0.11 0.16
 -10 0 -1 0.09 0.1
 -10 0 -1 -0.02 0.12
 -10 0 -1 0.08 0.17
 -10 0 -1 0.04 0.13
 11 0 1 0.17 0.19
 -11 0 -1 0.02 0.12
 -11 0 -1 0.06 0.12
 -11 0 -1 -0.01 0.14
 -11 0 -1 -0.1 0.15
 -11 0 -1 -0.1 0.14
 11 0 1 0.12 0.17
 11 -1 -1 8.96 0.55
 -11 -1 1 8.58 0.48
 -11 -1 1 8.49 0.4
 -11 -1 1 7.7 0.57
 11 -1 -1 8.02 0.39
 -11 -1 1 8.44 0.5
 -11 -1 1 8.45 0.47
 -11 1 1 9.39 0.63
 -11 1 1 9.79 0.52
 -11 1 1 9.25 0.49
 -11 1 1 9.27 0.44
 -11 1 1 9.62 0.54
 -10 -1 1 2.2 0.33
 -10 -1 1 1.96 0.25
 -10 -1 1 1.52 0.29
 -10 -1 1 2.02 0.36
 -10 -1 1 1.57 0.27
 10 -1 -1 2.22 0.25
 -10 1 1 2.03 0.33
 -10 1 1 1.92 0.38
 -10 1 1 2.25 0.27
 -10 1 1 2.23 0.34
 10 1 -1 2.01 0.26
 -10 1 1 2.16 0.18
 -10 1 1 2.27 0.33
 -9 -1 1 19.4 0.71
 -9 -1 1 19.44 0.81
 -9 -1 1 18.6 0.82
 -9 -1 1 18.87 1
 -9 -1 1 18.92 0.84
 9 -1 -1 19.22 0.67
 -9 -1 1 18.99 0.56
 -9 1 1 18.51 0.64
 -9 1 1 18.33 0.83
 -9 1 1 19.01 1.05
 -9 1 1 20.17 0.87
 9 1 -1 19.96 0.68
 -9 1 1 18.29 0.82
 -9 1 1 19.16 0.81
 -9 1 1 19.32 0.74
 8 -1 -1 11.91 0.49
 8 -1 -1 11.82 0.68
 -8 -1 1 11.59 0.72
 -8 -1 1 11.63 0.51
 -8 -1 1 11.17 0.45
 -8 -1 1 11.3 0.61
 -8 -1 1 11.54 0.6
 -8 -1 1 11.52 0.64
 -8 1 1 11.64 0.62
 -8 1 1 12.01 0.63
 -8 1 1 11.86 0.51
 -8 1 1 11.63 0.54
 -8 1 1 11.4 0.74
 -8 1 1 12.37 0.66
 7 -1 -1 0.31 0.14
 7 -1 -1 0.13 0.13
 7 -1 -1 0.02 0.14
 7 -1 -1 0.26 0.18
 7 1 -1 0.13 0.12
 6 -1 -1 24.52 0.82
 6 -1 -1 23.68 0.91
 6 -1 -1 24.92 0.89
 6 -1 -1 25.22 0.89
 -6 1 1 23.91 0.79
 6 1 -1 23.28 0.82
 5 -1 -1 41.7 1.33
 5 -1 -1 44.9 1.24
 5 -1 -1 44.94 1.31
 5 1 -1 42.89 1.24
 -5 1 1 42.63 1.17
 4 -1 -1 96.83 2.49
 4 -1 -1 101 2.59
 4 -1 -1 98.61 2.59
 4 1 -1 98.54 2.51
 -4 1 1 98.33 2.37
 -4 1 1 96.4 2.32
 4 1 -1 95.85 2.41
 3 -1 -1 6.52 0.27
 3 -1 -1 6.71 0.25
 -3 1 1 6.72 0.28
 -3 1 1 6.83 0.26
 3 1 -1 6.39 0.19
 3 1 -1 6.56 0.24
 3 1 -1 6.78 0.24
 2 -1 -1 79.57 1.94
 2 -1 -1 77.5 2
 -2 1 1 85.2 1.99
 2 1 -1 80.53 2.05
 2 1 -1 81.1 2.05
 1 -1 -1 283.34 6.98
 1 1 -1 272.13 6.91
 -1 1 1 291.63 6.54
 0 -1 -1 105.05 2.62
 0 1 1 109.22 2.57
 1 -1 1 186.84 4.63
 1 1 1 201.01 4.65
 2 -1 1 1.36 0.13
 2 -1 1 1.3 0.12
 -2 1 -1 0.08 0.04
 3 -1 1 1.11 0.13
 3 -1 1 1.02 0.14
 -3 1 -1 1.02 0.13
 3 1 1 0.96 0.13
 -3 1 -1 1.12 0.11
 4 -1 1 1.01 0.15
 4 -1 1 1.12 0.14
 4 -1 1 1.02 0.17
 -4 1 -1 0.81 0.13
 4 1 1 1.1 0.15
 5 -1 1 83.24 2.28
 5 -1 1 84.03 2.17
 5 -1 1 83.82 2.19
 5 -1 1 77.17 2.24
 -5 1 -1 82.27 2.04
 5 1 1 81.98 2.25
 6 -1 1 5.98 0.4
 6 -1 1 6.38 0.4
 6 -1 1 6.5 0.42
 6 -1 1 6.03 0.3
 6 1 1 6.29 0.39
 7 -1 1 23.31 0.92
 7 -1 1 23.56 0.71
 7 -1 1 23.42 0.94
 -8 -1 -1 32.72 0.96
 -8 -1 -1 33.15 1.12
 -8 -1 -1 31.58 1.01
 -8 -1 -1 33.22 1.11
 -8 -1 -1 32.78 1.47
 8 -1 1 32.45 0.94
 -8 -1 -1 32.65 1.09
 -8 1 -1 32.85 1.16
 8 1 1 34.58 0.97
 -8 1 -1 33.61 1.51
 -8 1 -1 33.33 1.12
 -8 1 -1 32.25 1.01
 -8 1 -1 33.39 1.07
 -8 1 -1 32.43 1.1
 -9 -1 -1 3.49 0.37
 -9 -1 -1 2.84 0.43
 -9 -1 -1 3.56 0.38
 9 -1 1 3.43 0.3
 -9 -1 -1 3.26 0.32
 -9 -1 -1 3.45 0.41
 -9 -1 -1 3.69 0.29
 -9 1 -1 3.5 0.39
 -9 1 -1 2.89 0.3
 -9 1 -1 3.21 0.4
 -9 1 -1 3.08 0.33
 -9 1 -1 3.01 0.39
 9 1 1 3.93 0.31
 -9 1 -1 2.97 0.47
 -9 1 -1 3.54 0.35
 -10 -1 -1 10.97 0.58
 -10 -1 -1 10.67 0.52
 -10 -1 -1 10.34 0.6
 10 -1 1 10.88 0.49
 -10 -1 -1 11 0.59
 -10 -1 -1 11.54 0.76
 -10 -1 -1 10.75 0.36
 -10 1 -1 9.98 0.6
 -10 1 -1 11.22 0.45
 -10 1 -1 11.43 0.77
 -10 1 -1 10.89 0.59
 10 1 1 10.91 0.48
 -10 1 -1 11.08 0.58
 -10 1 -1 10.33 0.53
 11 -1 1 1.3 0.28
 -11 -1 -1 1.41 0.24
 -11 -1 -1 0.99 0.17
 11 -1 1 1.09 0.17
 11 -1 1 0.71 0.25
 -11 -1 -1 1.24 0.3
 11 -1 1 1.05 0.23
 -11 -1 -1 1.06 0.21
 -11 -1 -1 1.61 0.27
 -11 1 -1 1.31 0.22
 -11 1 -1 0.91 0.18
 -11 1 -1 1.5 0.26
 -11 1 -1 1.22 0.23
 -11 1 -1 0.84 0.21
 -11 -2 1 0.9 0.19
 11 -2 -1 1.37 0.27
 11 -2 -1 1.43 0.2
 -11 -2 1 0.85 0.2
 11 -2 -1 0.98 0.27
 -11 -2 1 1.22 0.19
 11 -2 -1 0.9 0.22
 -11 -2 1 0.67 0.17
 -11 2 1 0.82 0.21
 -11 2 1 1.46 0.24
 -11 2 1 1.48 0.22
 -11 2 1 1.26 0.29
 -11 2 1 1.08 0.2
 -10 -2 1 3.57 0.38
 -10 -2 1 3.58 0.36
 -10 -2 1 3.76 0.4
 -10 -2 1 3.55 0.41
 -10 -2 1 3.63 0.29
 10 -2 -1 3.88 0.3
 -10 2 1 4.11 0.25
 -10 2 1 4.2 0.48
 -10 2 1 4.1 0.38
 -10 2 1 3.47 0.33
 -10 2 1 3.44 0.38
 -10 2 1 3.84 0.4
 -9 -2 1 22.44 0.56
 -9 -2 1 21.68 0.87
 -9 -2 1 22.81 0.9
 -9 -2 1 22.87 0.92
 9 -2 -1 22.36 0.99
 9 -2 -1 22.23 0.74
 -9 -2 1 21.67 1.11
 -9 -2 1 22.31 0.77
 -9 2 1 22.02 0.83
 -9 2 1 23.43 0.91
 -9 2 1 22.32 0.95
 -9 2 1 22.82 0.91
 -9 2 1 23 1.21
 -9 2 1 23.14 0.76
 9 2 -1 23.19 0.77
 -8 -2 1 6.12 0.51
 -8 -2 1 5.77 0.37
 8 -2 -1 6.17 0.52
 8 -2 -1 5.33 0.44
 -8 -2 1 5.5 0.46
 8 -2 -1 6.94 0.55
 8 -2 -1 6.17 0.36
 -8 -2 1 5.93 0.3
 -8 -2 1 5.95 0.47
 -8 -2 1 6.88 0.46
 -8 2 1 6.07 0.55
 -8 2 1 6.15 0.47
 -8 2 1 6.2 0.48
 -8 2 1 5.84 0.48
 -8 2 1 5.82 0.38
 -8 2 1 6.02 0.4
 7 -2 -1 106.79 2.98
 7 -2 -1 102.53 2.84
 7 -2 -1 105.95 2.92
 7 -2 -1 104.76 2.83
 7 -2 -1 99.9 2.96
 7 -2 -1 102.08 2.32
 -7 2 1 106.5 2.77
 -7 2 1 108.26 2.72
 6 -2 -1 97.58 2.21
 6 -2 -1 104.6 2.83
 6 -2 -1 98.39 2.68
 6 -2 -1 100.47 2.7
 6 -2 -1 102.04 2.83
 -6 2 1 104.24 2.63
 5 -2 -1 78.29 1.93
 5 -2 -1 81.09 2.28
 5 -2 -1 80.06 2.16
 5 -2 -1 82.92 2.26
 5 -2 -1 79.46 1.98
 -5 2 1 86.01 2.19
 4 -2 -1 259.37 6.39
 4 -2 -1 252.39 6.2
 4 -2 -1 246.04 6.28
 4 -2 -1 251.1 5.56
 -4 2 1 256.61 5.84
 3 -2 -1 113.34 2.91
 3 -2 -1 115.31 3
 3 -2 -1 117.64 2.99
 -3 2 1 122.79 3.01
 -3 2 1 123.39 2.9
 3 2 -1 123.22 2.94
 2 -2 -1 14.63 0.5
 2 -2 -1 14.28 0.47
 -2 2 1 17.77 0.55
 -2 2 1 14.64 0.51
 1 -2 -1 0.96 0.12
 -1 2 1 0.11 0.07
 0 -2 1 19.73 0.59
 0 -2 -1 19.98 0.6
 0 2 -1 23.55 0.67
 0 2 1 22.23 0.66
 1 -2 1 5.46 0.24
 1 -2 1 6.11 0.27
 1 2 1 6.47 0.27
 -1 2 -1 6.43 0.29
 2 -2 1 89.88 2.3
 2 -2 1 84.89 2.22
 2 2 1 97.09 2.31
 -2 2 -1 93.3 2.5
 -2 2 -1 94.12 2.26
 -2 2 -1 97.82 2.37
 3 -2 1 14.42 0.53
 3 -2 1 14.3 0.55
 3 -2 1 12.72 0.48
 3 2 1 13.99 0.42
 -3 2 -1 14.63 0.5
 -3 2 -1 13.74 0.5
 4 -2 1 5.13 0.33
 4 -2 1 4.56 0.27
 4 -2 1 4.99 0.31
 4 -2 1 4.58 0.28
 -4 2 -1 5.06 0.3
 -4 2 -1 4.17 0.25
 5 -2 1 39.38 1.12
 5 -2 1 39.39 1.24
 5 -2 1 39.9 1.1
 5 -2 1 39.32 1.3
 5 -2 1 41.34 1.29
 5 -2 1 41.46 1.22
 -5 2 -1 42.11 1.22
 6 -2 1 70.94 2.09
 6 -2 1 68.67 1.61
 6 -2 1 70.73 1.99
 6 -2 1 69.24 2.09
 6 -2 1 68.55 1.99
 -6 2 -1 73.7 1.97
 7 -2 1 19.36 0.88
 7 -2 1 19.17 0.63
 7 -2 1 18.76 0.78
 7 -2 1 19.98 0.87
 7 -2 1 18.88 0.86
 -7 2 -1 20.39 0.84
 7 2 1 20.76 0.68
 8 -2 1 31.07 1.11
 8 -2 1 29.31 0.89
 -8 -2 -1 30.92 1.06
 8 -2 1 29.81 1.17
 -8 -2 -1 30.47 1.07
 -8 -2 -1 31.85 1.11
 -8 -2 -1 30.53 1.4
 -8 -2 -1 30.41 0.97
 8 -2 1 29.96 1.23
 -8 -2 -1 30.53 0.9
 8 2 1 31.04 0.93
 -8 2 -1 32.78 1.51
 -8 2 -1 30.55 0.99
 -8 2 -1 31.17 1.05
 -8 2 -1 30.51 1.07
 -8 2 -1 31.84 1.08
 -8 2 -1 31.15 1.14
 -9 -2 -1 15.25 0.72
 -9 -2 -1 14.24 0.51
 9 -2 1 15.74 0.6
 9 -2 1 16.16 0.82
 -9 -2 -1 14.51 0.69
 -9 -2 -1 13.98 0.88
 -9 -2 -1 14.99 0.63
 -9 -2 -1 14.93 0.72
 -9 2 -1 15.61 0.64
 -9 2 -1 15.06 0.95
 -9 2 -1 14.91 0.75
 -9 2 -1 15.72 0.74
 -9 2 -1 15.04 0.68
 -9 2 -1 14.6 0.69
 -10 -2 -1 11.81 0.61
 -10 -2 -1 12.63 0.62
 -10 -2 -1 12.21 0.78
 -10 -2 -1 12.07 0.54
 10 -2 1 11.79 0.5
 -10 -2 -1 11.46 0.62
 10 -2 1 11.81 0.87
 10 -2 1 12.14 0.68
 -10 2 -1 12.26 0.59
 -10 2 -1 11.89 0.62
 -10 2 -1 11.61 0.59
 -10 2 -1 11.77 0.81
 -10 2 -1 11.6 0.48
 -10 2 -1 11.12 0.58
 11 -2 1 22.13 0.83
 -11 -2 -1 20.38 0.73
 11 -2 1 20.52 0.64
 -11 -2 -1 21.33 0.7
 -11 -2 -1 21.32 1.02
 11 -2 1 21.47 0.86
 -11 -2 -1 21.23 0.77
 11 -2 1 22.23 1.1
 -11 2 -1 21.37 0.73
 -11 2 -1 21.52 0.78
 -11 2 -1 20.72 0.71
 -11 2 -1 21.61 0.73
 -11 2 -1 20.35 1.01
 11 -3 -1 25.44 0.94
 -11 -3 1 26.55 0.83
 -11 -3 1 25.74 0.84
 11 -3 -1 27.86 0.94
 11 -3 -1 27.74 1.21
 -11 -3 1 26.71 0.74
 -11 -3 1 26.18 1.13
 -11 3 1 26.31 1.15
 -11 3 1 26.82 0.85
 -11 3 1 25.13 0.79
 -11 3 1 26.45 0.8
 -11 3 1 26.27 0.79
 10 -3 -1 4.04 0.29
 -10 -3 1 4.11 0.44
 10 -3 -1 4.54 0.47
 -10 -3 1 4.04 0.37
 10 -3 -1 3.99 0.53
 -10 -3 1 4.22 0.31
 10 -3 -1 4 0.42
 -10 -3 1 4.3 0.4
 -10 3 1 4.09 0.35
 -10 3 1 3.91 0.26
 -10 3 1 4.03 0.39
 -10 3 1 4.06 0.4
 -10 3 1 4.2 0.37
 -10 3 1 4.36 0.49
 -10 3 1 3.92 0.4
 -9 -3 1 17.93 0.78
 -9 -3 1 17.44 0.78
 -9 -3 1 17.7 0.97
 9 -3 -1 19.27 0.96
 9 -3 -1 18.5 0.88
 9 -3 -1 18.04 0.64
 -9 -3 1 17.19 0.78
 -9 -3 1 17.42 0.67
 -9 3 1 18.68 0.76
 -9 3 1 18.39 1.08
 -9 3 1 18.58 0.78
 -9 3 1 19.18 0.85
 -9 3 1 17.9 0.67
 -9 3 1 18.18 0.79
 -8 -3 1 57.2 1.5
 -8 -3 1 55.15 1.61
 -8 -3 1 53.05 1.3
 -8 -3 1 54.8 1.62
 -8 -3 1 56.27 2.19
 -8 -3 1 56.22 1.65
 8 -3 -1 56.93 1.83
 8 -3 -1 58.78 1.93
 8 -3 -1 56.67 1.74
 -8 3 1 58.05 1.72
 -8 3 1 55.57 1.62
 -8 3 1 57.84 1.52
 -8 3 1 56.88 1.58
 -8 3 1 56.39 2.28
 -8 3 1 55.83 1.62
 7 -3 -1 30.3 1.07
 7 -3 -1 30.85 1.17
 -7 -3 1 30.59 1.36
 -7 -3 1 31.99 1.09
 7 -3 -1 30.76 1.12
 7 -3 -1 28.91 1.19
 7 -3 -1 33.21 1.26
 -7 -3 1 31.26 1.06
 7 -3 -1 30.89 0.89
 -7 -3 1 32.02 0.95
 -7 -3 1 29.07 0.84
 -7 -3 1 31 1.06
 -7 3 1 31.67 1.1
 -7 3 1 34.47 1.49
 -7 3 1 31.18 1.14
 -7 3 1 33.37 1.15
 -7 3 1 31.46 1.01
 -7 3 1 31.29 1.08
 -7 3 1 30.68 1.07
 6 -3 -1 104.15 2.54
 6 -3 -1 104.66 2.99
 6 -3 -1 103.61 2.82
 6 -3 -1 107.24 2.99
 6 -3 -1 104.65 2.61
 6 -3 -1 105.77 2.86
 6 -3 -1 101.54 2.31
 6 -3 -1 104.84 2.83
 6 -3 -1 103.05 2.82
 -6 3 1 111.97 2.88
 5 -3 -1 25.77 0.9
 5 -3 -1 25.85 0.99
 5 -3 -1 25.51 0.95
 5 -3 -1 25.61 0.72
 5 -3 -1 25.18 0.84
 5 -3 -1 25.82 0.86
 -5 3 1 27.62 0.95
 4 -3 -1 283.27 6.31
 4 -3 -1 291.64 7.03
 4 -3 -1 288.35 7.24
 4 -3 -1 276.14 7.1
 4 -3 -1 279.94 6.12
 -4 3 1 303.75 7.17
 -4 3 1 296.02 6.84
 3 -3 -1 1.01 0.17
 3 -3 -1 1.82 0.21
 3 -3 -1 0.64 0.16
 3 -3 -1 1.2 0.17
 3 3 -1 0.98 0.14
 -3 3 1 1.14 0.17
 -3 3 1 0.92 0.16
 2 -3 -1 145.91 3.66
 2 -3 -1 140.25 3.21
 2 -3 -1 132.29 3.57
 2 -3 -1 141.96 3.54
 2 3 -1 151.33 3.62
 -2 3 1 142.69 3.46
 -2 3 1 152.44 3.67
 1 -3 -1 13.45 0.51
 1 -3 -1 13.86 0.48
 1 -3 -1 12.1 0.49
 -1 3 1 14.35 0.5
 -1 3 1 15.41 0.56
 1 3 -1 14.67 0.53
 0 -3 -1 74.37 2
 0 3 -1 72.09 1.78
 0 3 1 73.99 1.92
 0 3 -1 76.83 1.94
 0 3 1 74.8 1.82
 1 -3 1 5.8 0.28
 1 -3 1 6.02 0.31
 1 -3 1 6.34 0.31
 -1 3 -1 6.75 0.31
 -1 3 -1 6.82 0.34
 1 3 1 7.19 0.33
 2 -3 1 3.37 0.23
 2 -3 1 2.94 0.24
 2 -3 1 2.68 0.21
 2 -3 1 2.45 0.23
 -2 3 -1 3.4 0.25
 2 3 1 3.01 0.21
 -2 3 -1 2.91 0.22
 3 -3 1 0.32 0.11
 3 -3 1 0.37 0.13
 3 -3 1 0.15 0.11
 3 -3 1 0.36 0.13
 3 3 1 0.44 0.11
 -3 3 -1 0.33 0.13
 -3 3 -1 0.29 0.13
 4 -3 1 4.79 0.31
 4 -3 1 5.08 0.35
 4 -3 1 5.01 0.36
 4 -3 1 4.98 0.36
 4 -3 1 4.41 0.3
 4 -3 1 4.2 0.29
 -4 3 -1 4.62 0.33
 -4 3 -1 5.16 0.33
 5 -3 1 27.63 0.96
 5 -3 1 27.34 1.03
 5 -3 1 29.49 1.07
 5 -3 1 27.27 1
 5 -3 1 28.23 0.9
 5 -3 1 28.35 0.92
 5 -3 1 28.8 0.78
 -5 3 -1 31.87 1.05
 6 -3 1 28.99 1.05
 6 -3 1 26.98 0.78
 6 -3 1 28.12 0.92
 6 -3 1 27.65 1.09
 6 -3 1 29.06 0.98
 6 -3 1 27.49 1.04
 6 -3 1 25.3 1.06
 6 -3 1 27.42 0.94
 6 -3 1 26.36 0.99
 -6 3 -1 30.89 1.07
 7 -3 1 22.51 0.99
 -7 -3 -1 22.02 1.09
 -7 -3 -1 20.41 0.84
 -7 -3 -1 22.44 0.89
 7 -3 1 20.43 0.93
 -7 -3 -1 21.13 0.84
 7 -3 1 20.44 0.68
 -7 -3 -1 20.65 0.77
 -7 -3 -1 20.9 0.7
 7 -3 1 22.07 0.85
 -7 3 -1 21.25 0.66
 -7 3 -1 22.18 0.91
 -7 3 -1 21.18 0.81
 -7 3 -1 21.02 0.89
 -7 3 -1 20.94 0.83
 -7 3 -1 22.73 0.89
 8 -3 1 1.21 0.27
 -8 -3 -1 1.02 0.27
 8 -3 1 2.47 0.5
 8 -3 1 1.1 0.27
 -8 -3 -1 0.97 0.25
 -8 -3 -1 1 0.26
 -8 -3 -1 1.01 0.2
 8 -3 1 1.07 0.19
 -8 -3 -1 0.96 0.18
 8 -3 1 1.31 0.3
 -8 -3 -1 1.3 0.27
 -8 3 -1 1.34 0.28
 -8 3 -1 1.1 0.24
 -8 3 -1 1.6 0.28
 -8 3 -1 1.24 0.29
 -8 3 -1 0.76 0.25
 -9 -3 -1 27.53 0.74
 -9 -3 -1 27.57 0.99
 -9 -3 -1 25.95 0.96
 9 -3 1 27.47 1.12
 -9 -3 -1 27.44 0.92
 9 -3 1 26.17 0.83
 -9 -3 -1 26.86 1.3
 9 -3 1 26.64 1.07
 9 -3 1 26.69 1.4
 -9 -3 -1 27.6 1
 -9 3 -1 26.77 0.97
 -9 3 -1 28.11 1.05
 -9 3 -1 26.85 0.98
 -9 3 -1 27.88 0.91
 -9 3 -1 27.27 0.98
 -9 3 -1 28.75 1.38
 10 -3 1 7.58 0.39
 10 -3 1 8.14 0.52
 -10 -3 -1 7.15 0.46
 -10 -3 -1 7.76 0.42
 -10 -3 -1 8.11 0.6
 10 -3 1 7.4 0.65
 -10 -3 -1 8.22 0.5
 10 -3 1 7.26 0.57
 -10 3 -1 7.34 0.45
 -10 3 -1 8.24 0.48
 -10 3 -1 7.48 0.39
 -10 3 -1 8.28 0.52
 -10 3 -1 7.07 0.45
 -10 3 -1 8.06 0.52
 -10 3 -1 7.3 0.63
 11 -3 1 14.37 0.67
 -11 -3 -1 15.63 0.53
 -11 -3 -1 15.98 0.6
 11 -3 1 15.28 0.81
 -11 -3 -1 15.75 0.59
 11 -3 1 15.33 0.62
 -11 -3 -1 15.74 0.79
 11 3 1 15.99 0.68
 11 3 1 14.69 0.86
 -11 3 -1 16.65 0.62
 -11 3 -1 16.98 0.6
 -10 -4 1 5.28 0.39
 -10 -4 1 4.67 0.37
 -10 -4 1 5.03 0.31
 10 -4 -1 5.25 0.31
 -10 -4 1 5.04 0.45
 10 -4 -1 4.9 0.38
 10 -4 -1 5.17 0.49
 -10 4 1 4.94 0.37
 -10 4 1 5.31 0.37
 -10 4 1 5.19 0.27
 -10 4 1 4.45 0.39
 -10 4 1 4.71 0.35
 -9 -4 1 0.07 0.16
 9 -4 -1 0.15 0.2
 9 -4 -1 0.16 0.14
 -9 -4 1 0.07 0.11
 9 -4 -1 0.07 0.17
 -9 -4 1 0.08 0.12
 -9 -4 1 0.1 0.16
 9 -4 -1 -0.05 0.17
 -9 4 1 0.06 0.13
 -9 4 1 -0.16 0.19
 -9 4 1 0.29 0.17
 -9 4 1 0.13 0.17
 -9 4 1 0.12 0.17
 -9 4 1 -0.08 0.15
 -8 -4 1 13.27 0.42
 8 -4 -1 13.27 0.74
 -8 -4 1 12.51 0.56
 -8 -4 1 12.73 0.8
 8 -4 -1 12.61 0.51
 -8 -4 1 12.2 0.63
 8 -4 -1 13.28 0.93
 8 -4 -1 12.94 0.64
 8 -4 -1 12.82 0.79
 -8 -4 1 12.36 0.65
 8 -4 -1 12.88 0.7
 -8 4 1 12.33 0.63
 -8 4 1 13.89 0.7
 -8 4 1 12.66 0.64
 -8 4 1 12.67 0.7
 -8 4 1 12.79 0.6
 7 -4 -1 17.39 0.62
 7 -4 -1 17.44 0.76
 7 -4 -1 17.72 0.78
 7 -4 -1 17.95 0.91
 7 -4 -1 18.89 0.88
 -7 -4 1 17.61 0.68
 -7 -4 1 17.97 0.77
 7 -4 -1 17.48 0.77
 -7 -4 1 19.11 1
 7 -4 -1 16.68 0.87
 -7 -4 1 18.39 0.79
 7 -4 -1 20.84 1.11
 -7 4 1 17.24 0.72
 -7 4 1 18.24 0.78
 -7 4 1 19.02 0.83
 -7 4 1 18.31 0.78
 -7 4 1 19.53 0.86
 -7 4 1 19.84 0.87
 -7 4 1 18.86 0.52
 6 -4 -1 2.97 0.4
 6 -4 -1 3.09 0.31
 6 -4 -1 3.32 0.34
 6 -4 -1 2.83 0.32
 6 -4 -1 3.11 0.37
 6 -4 -1 2.7 0.24
 -6 -4 1 3.3 0.27
 6 -4 -1 2.76 0.34
 6 -4 -1 3.12 0.38
 -6 4 1 3.3 0.39
 -6 4 1 3.58 0.36
 -6 4 1 3.01 0.3
 -6 4 1 3.56 0.4
 5 -4 -1 87.94 2.19
 5 -4 -1 86.86 2.24
 5 -4 -1 84.87 2.42
 5 -4 -1 85.67 2.53
 5 -4 -1 86.04 2.37
 5 -4 -1 84.09 1.94
 5 -4 -1 82.14 2.55
 5 -4 -1 85.76 2.42
 5 -4 -1 88.66 2.42
 -5 4 1 90.34 2.43
 4 -4 -1 25.29 0.71
 4 -4 -1 25.99 0.99
 4 -4 -1 25.49 0.98
 4 -4 -1 25.43 0.94
 4 -4 -1 24.16 0.86
 4 -4 -1 25.4 0.85
 -4 4 1 28.09 1.01
 -4 4 1 27.42 0.95
 3 -4 -1 74.21 2.22
 3 -4 -1 79.12 2.14
 3 -4 -1 75.96 1.92
 3 -4 -1 79.85 2.22
 3 -4 -1 75.38 1.97
 3 -4 -1 78.71 1.73
 3 4 -1 82.74 2.23
 -3 4 1 85.68 2.2
 -3 4 1 86.21 2.33
 2 -4 -1 3.56 0.26
 2 -4 -1 3.4 0.27
 2 -4 -1 3.32 0.28
 2 -4 -1 3.37 0.26
 -2 4 1 4.64 0.34
 -2 4 1 4.12 0.29
 2 4 -1 4.19 0.29
 1 -4 -1 140.26 3.24
 1 -4 -1 146.73 3.62
 1 -4 -1 136.09 3.25
 -1 -4 1 138.84 3.22
 -1 4 1 157.12 3.97
 -1 4 1 160.43 3.72
 1 4 -1 159.1 3.94
 0 -4 -1 7.66 0.37
 0 -4 1 7.17 0.36
 0 4 1 7.77 0.42
 0 4 -1 8.4 0.43
 0 4 -1 8.46 0.37
 0 4 1 8.09 0.36
 1 -4 1 45.89 1.36
 -1 -4 -1 45.59 1.2
 1 -4 1 46.11 1.22
 1 -4 1 45.16 1.25
 -1 4 -1 51.44 1.39
 -1 4 -1 51.83 1.51
 1 4 1 51.72 1.48
 2 -4 1 2.35 0.23
 2 -4 1 2.57 0.25
 2 -4 1 2.37 0.22
 2 4 1 2.77 0.24
 -2 4 -1 3.2 0.29
 -2 4 -1 3.09 0.25
 3 -4 1 0.36 0.13
 3 -4 1 0.66 0.17
 3 -4 1 0.36 0.14
 3 -4 1 0.31 0.11
 3 -4 1 0.24 0.12
 -3 4 -1 0.69 0.17
 -3 4 -1 0.69 0.2
 4 -4 1 40.11 1.21
 4 -4 1 37.92 1.27
 4 -4 1 39.15 1
 4 -4 1 40.6 1.18
 4 -4 1 39.9 1.35
 -4 4 -1 42.28 1.35
 -4 4 -1 42.45 1.32
 5 -4 1 1.79 0.25
 5 -4 1 2.16 0.26
 5 -4 1 1.9 0.33
 5 -4 1 2.39 0.31
 5 -4 1 1.85 0.2
 5 -4 1 2.09 0.33
 5 -4 1 2.19 0.27
 -5 4 -1 1.93 0.27
 -6 -4 -1 51.28 1.37
 6 -4 1 53.29 1.57
 6 -4 1 56.37 2.19
 6 -4 1 50.62 1.6
 6 -4 1 52.66 1.33
 6 -4 1 52.93 1.72
 6 -4 1 53.16 1.8
 6 -4 1 53.25 1.53
 6 -4 1 53.38 1.7
 -6 4 -1 57.13 1.73
 -6 4 -1 55.59 1.67
 -6 4 -1 56.82 1.52
 7 -4 1 0.15 0.19
 7 -4 1 -0.04 0.19
 7 -4 1 0.12 0.19
 -7 -4 -1 0.12 0.13
 7 -4 1 0.14 0.19
 7 -4 1 0.13 0.12
 -7 -4 -1 0.06 0.17
 -7 -4 -1 0.15 0.14
 -7 -4 -1 0.09 0.13
 7 -4 1 -0.02 0.2
 -7 -4 -1 -0.1 0.15
 7 -4 1 0.12 0.17
 7 -4 1 -0.21 0.19
 -7 4 -1 0.16 0.2
 -7 4 -1 0.21 0.16
 -7 4 -1 0 0.17
 -7 4 -1 0.15 0.19
 -7 4 -1 0.17 0.13
 -7 4 -1 0.38 0.23
 8 -4 1 26.03 1.04
 -8 -4 -1 26.96 0.98
 8 -4 1 26.49 1.11
 8 -4 1 27.34 1.18
 -8 -4 -1 27.07 0.92
 -8 -4 -1 26.44 1.3
 -8 -4 -1 27.24 1
 -8 -4 -1 24.68 0.77
 8 -4 1 27.12 0.82
 8 -4 1 26.56 1.36
 -8 4 -1 24.84 1.02
 -8 4 -1 24.61 0.9
 -8 4 -1 26.01 0.93
 -8 4 -1 26.73 1.03
 -9 -4 -1 1.52 0.27
 9 -4 1 0.96 0.27
 9 -4 1 1.26 0.29
 -9 -4 -1 1.33 0.32
 9 -4 1 0.95 0.21
 -9 -4 -1 1.22 0.13
 -9 -4 -1 1.63 0.28
 9 -4 1 1.36 0.21
 -9 -4 -1 1.22 0.21
 -9 4 -1 1.15 0.28
 -9 4 -1 1.14 0.23
 -9 4 -1 0.94 0.23
 -10 -4 -1 0.51 0.18
 10 -4 1 0.37 0.19
 -10 -4 -1 0.34 0.16
 -10 -4 -1 0.53 0.17
 10 -4 1 0.47 0.2
 -10 -4 -1 0.75 0.16
 10 -4 1 0.56 0.17
 -10 4 -1 0.51 0.18
 -10 4 -1 0.42 0.13
 -10 4 -1 0.57 0.18
 -10 -5 1 3.55 0.3
 -10 -5 1 3.33 0.34
 -10 -5 1 3.1 0.22
 -10 -5 1 3.23 0.27
 10 -5 -1 3.56 0.34
 10 -5 -1 3.29 0.34
 10 -5 -1 3.37 0.27
 -10 5 1 2.95 0.29
 -10 5 1 3.88 0.19
 -10 5 1 3.62 0.29
 -9 -5 1 2.09 0.34
 -9 -5 1 1.46 0.23
 9 -5 -1 1.91 0.37
 -9 -5 1 1.9 0.29
 -9 -5 1 1.89 0.28
 9 -5 -1 1.6 0.22
 9 -5 -1 1.85 0.29
 9 -5 -1 1.37 0.29
 -9 5 1 1.87 0.27
 -9 5 1 1.67 0.22
 -9 5 1 1.37 0.25
 -8 -5 1 0.92 0.24
 -8 -5 1 0.49 0.17
 8 -5 -1 0.64 0.16
 -8 -5 1 0.68 0.22
 -8 -5 1 0.98 0.19
 8 -5 -1 0.89 0.22
 8 -5 -1 1.05 0.26
 8 -5 -1 0.83 0.27
 8 -5 -1 0.67 0.25
 -8 5 1 0.9 0.27
 -8 5 1 0.54 0.19
 -8 5 1 0.51 0.2
 -8 5 1 0.88 0.22
 7 -5 -1 11.16 0.61
 -7 -5 1 10.05 0.51
 -7 -5 1 9.68 0.71
 7 -5 -1 9.3 0.63
 7 -5 -1 10.53 0.61
 7 -5 -1 10.17 0.66
 7 -5 -1 11.47 0.57
 -7 -5 1 10.73 0.58
 7 -5 -1 10.92 0.46
 7 -5 -1 10.57 0.8
 7 -5 -1 9.7 0.68
 -7 -5 1 9.89 1.53
 -7 -5 1 10.91 0.6
 -7 -5 1 9.54 0.42
 -7 5 1 9.92 0.58
 -7 5 1 10.83 0.65
 -7 5 1 10.36 0.65
 -7 5 1 10.79 0.58
 -7 5 1 10.61 0.34
 -7 5 1 9.41 0.56
 -7 5 1 10.19 0.63
 6 -5 -1 2.7 0.38
 6 -5 -1 3.84 0.4
 6 -5 -1 2.95 0.33
 6 -5 -1 2.88 0.5
 -6 -5 1 3 0.3
 -6 -5 1 3.03 0.27
 6 -5 -1 2.71 0.4
 6 -5 -1 3.34 0.27
 6 -5 -1 2.9 0.41
 -6 -5 1 3.07 0.35
 -6 -5 1 3.39 0.36
 6 -5 -1 3.2 0.37
 -6 -5 1 3.11 1.1
 -6 -5 1 2.93 0.42
 -6 5 1 3.08 0.31
 -6 5 1 2.91 0.36
 -6 5 1 3.39 0.39
 -6 5 1 3.1 0.36
 -6 5 1 3.16 0.4
 -6 5 1 2.97 0.37
 5 -5 -1 53.16 1.32
 -5 -5 1 49.35 1.49
 -5 -5 1 52.42 1.53
 5 -5 -1 56.2 1.72
 -5 -5 1 53.75 1.38
 5 -5 -1 53.23 1.6
 5 -5 -1 51.49 2.15
 -5 -5 1 51.37 1.45
 5 -5 -1 49.99 1.58
 5 -5 -1 55.39 1.57
 5 -5 -1 52.46 1.72
 -5 -5 1 55 2.11
 5 -5 -1 53.07 1.8
 -5 5 1 54.33 1.56
 -5 5 1 53 1.32
 -5 5 1 56.79 1.7
 -5 5 1 53.37 1.5
 -5 5 1 54.77 1.64
 4 -5 -1 6.01 0.31
 4 -5 -1 5.39 0.37
 4 -5 -1 5.87 0.46
 4 -5 -1 5.74 0.47
 4 -5 -1 6.08 0.47
 4 -5 -1 5.99 0.43
 4 -5 -1 6.2 0.42
 -4 5 1 5.83 0.48
 -4 5 1 6.94 0.47
 3 -5 -1 0 0.14
 3 -5 -1 0 0.13
 3 -5 -1 0.13 0.09
 3 -5 -1 0.07 0.12
 3 -5 -1 0.04 0.14
 3 -5 -1 0.02 0.11
 3 -5 -1 0.13 0.15
 -3 5 1 0 0.13
 -3 5 1 0.08 0.12
 2 -5 -1 2.82 0.31
 2 -5 -1 2.44 0.27
 2 -5 -1 2.95 0.33
 2 -5 -1 2.6 0.26
 2 5 -1 2.26 0.26
 -2 5 1 2.73 0.26
 -2 5 1 2.06 0.28
 1 -5 -1 0.06 0.12
 -1 -5 1 0.16 0.13
 1 -5 -1 0.07 0.11
 1 5 -1 0.27 0.16
 -1 5 1 0.32 0.13
 -1 5 1 0.15 0.14
 0 -5 -1 0.58 0.16
 0 -5 1 0.85 0.18
 0 -5 -1 0.32 0.13
 0 -5 1 0.66 0.17
 0 5 -1 0.46 0.17
 0 5 1 0.72 0.2
 1 -5 1 13.82 0.59
 1 -5 1 12.94 0.56
 -1 5 -1 14.97 0.69
 1 5 1 13.44 0.64
 -1 5 -1 14.98 0.6
 2 -5 1 1.75 0.24
 2 -5 1 1.89 0.31
 2 -5 1 1.78 0.23
 2 -5 1 1.05 0.23
 -2 5 -1 1.83 0.28
 2 5 1 1.52 0.25
 -2 5 -1 1.31 0.22
 3 -5 1 15.99 0.77
 3 -5 1 17.52 0.76
 3 -5 1 16.52 0.69
 3 -5 1 17.6 0.79
 3 -5 1 17.37 0.72
 -3 5 -1 18.64 0.77
 -3 5 -1 19.69 0.85
 4 -5 1 0.11 0.13
 4 -5 1 0.07 0.13
 4 -5 1 -0.06 0.1
 4 -5 1 0.02 0.15
 4 -5 1 0.38 0.2
 4 -5 1 -0.07 0.15
 4 -5 1 0.17 0.15
 -4 5 -1 -0.24 0.15
 -4 5 -1 -0.11 0.15
 -4 5 -1 0 0.13
 -5 -5 -1 64.38 3.93
 -5 -5 -1 60.95 1.71
 -5 -5 -1 60.16 2.37
 -5 -5 -1 58.71 1.67
 5 -5 1 57.06 1.68
 5 -5 1 57.94 1.75
 5 -5 1 62.47 2.01
 5 -5 1 59.16 2.37
 5 -5 1 61.1 1.45
 5 -5 1 61.12 1.91
 -5 -5 -1 59.43 1.58
 -5 -5 -1 60.15 1.69
 5 -5 1 61.67 1.89
 5 -5 1 61.53 1.77
 -5 5 -1 63.88 1.9
 -5 5 -1 63.52 1.59
 -5 5 -1 64.65 1.75
 -5 5 -1 61.5 1.82
 6 -5 1 23.86 0.88
 -6 -5 -1 24.77 0.93
 6 -5 1 24.07 1.03
 -6 -5 -1 21.21 2.12
 6 -5 1 23.3 0.91
 -6 -5 -1 22.37 0.84
 -6 -5 -1 22.7 0.89
 6 -5 1 24.02 0.73
 6 -5 1 24.82 1.02
 6 -5 1 21.82 1.19
 6 -5 1 22.55 1.06
 6 -5 1 22.24 0.91
 6 -5 1 21.88 0.91
 -6 -5 -1 22.07 0.78
 -6 -5 -1 23.26 1.2
 -6 5 -1 23.44 0.96
 -6 5 -1 23.58 0.98
 -6 5 -1 23.76 0.84
 7 -5 1 19.82 1.14
 -7 -5 -1 21.27 0.87
 -7 -5 -1 21.7 2.17
 7 -5 1 22.42 0.99
 7 -5 1 22.48 0.89
 7 -5 1 20.77 1.03
 -7 -5 -1 22.81 0.83
 7 -5 1 22.23 0.99
 7 -5 1 21.04 0.69
 -7 -5 -1 21.67 0.72
 -7 -5 -1 23.4 0.9
 -7 -5 -1 21.67 1.16
 7 -5 1 21.45 0.88
 -7 5 -1 22.07 0.88
 -7 5 -1 22.26 0.94
 -7 5 -1 21.45 0.7
 -7 5 -1 21.15 0.94
 -8 -5 -1 -0.19 0.15
 -8 -5 -1 0.07 0.15
 -8 -5 -1 0.07 0.1
 -8 -5 -1 0.1 0.13
 8 -5 1 0.17 0.19
 8 -5 1 0.2 0.2
 -8 -5 -1 0.08 0.14
 8 -5 1 0.39 0.17
 8 -5 1 0.06 0.13
 -8 5 -1 -0.09 0.14
 -8 5 -1 0.21 0.18
 -9 -5 -1 4.55 0.38
 -9 -5 -1 4.38 0.46
 -9 -5 -1 4.26 0.33
 9 -5 1 4.04 0.34
 9 -5 1 4.53 0.46
 -9 -5 -1 4.83 0.37
 9 -5 1 4.34 0.46
 9 -5 1 4.38 0.42
 -9 5 -1 4.57 0.36
 -9 5 -1 5.17 0.41
 9 5 1 4.35 0.45
 10 -5 1 -0.07 0.09
 -10 -5 -1 0.1 0.09
 -10 -5 -1 -0.09 0.09
 -10 -5 -1 0.06 0.12
 10 -5 1 0.1 0.12
 -10 -5 -1 0.18 0.11
 10 -5 1 -0.16 0.14
 10 5 1 0.06 0.13
 -10 5 -1 0.16 0.09
 10 5 1 0.08 0.15
 -10 5 -1 -0.05 0.11
 -9 -6 1 0.74 0.17
 -9 -6 1 0.69 0.17
 9 -6 -1 0.97 0.23
 -9 -6 1 0.9 0.15
 9 -6 -1 0.93 0.14
 -9 -6 1 0.61 0.16
 -9 6 1 0.84 0.15
 9 6 -1 0.88 0.19
 9 6 -1 0.91 0.23
 -9 6 1 1.18 0.22
 -8 -6 1 0.85 0.17
 -8 -6 1 0.62 0.19
 8 -6 -1 0.77 0.25
 8 -6 -1 0.69 0.16
 8 -6 -1 0.61 0.19
 -8 -6 1 0.57 0.19
 8 -6 -1 0.85 0.24
 -8 -6 1 0.87 0.21
 -8 6 1 0.77 0.19
 -8 6 1 0.25 0.16
 -8 6 1 1.31 0.27
 7 -6 -1 0.14 0.15
 7 -6 -1 -0.14 0.18
 7 -6 -1 0.16 0.18
 -7 -6 1 0.48 0.19
 7 -6 -1 -0.06 0.15
 -7 -6 1 0.1 0.13
 -7 -6 1 -0.01 0.12
 -7 -6 1 -0.15 0.15
 7 -6 -1 0.06 0.19
 -7 -6 1 0.18 0.16
 -7 -6 1 0.09 0.09
 7 -6 -1 0.12 0.19
 -7 6 1 0.19 0.17
 -7 6 1 -0.08 0.16
 -7 6 1 0.17 0.2
 -7 6 1 0.36 0.23
 6 -6 -1 0.81 0.21
 6 -6 -1 1.72 0.29
 -6 -6 1 1.09 0.24
 6 -6 -1 0.95 0.31
 6 -6 -1 0.86 0.25
 -6 -6 1 1 0.25
 -6 -6 1 1.1 0.22
 -6 -6 1 1.01 0.24
 6 -6 -1 1.26 0.28
 6 -6 -1 1.42 0.29
 -6 -6 1 1.22 0.19
 6 -6 -1 0.84 0.25
 -6 6 1 1.49 0.31
 -6 6 1 1.41 0.29
 -6 6 1 1.12 0.22
 -6 6 1 1.15 0.28
 5 -6 -1 3.82 0.46
 -5 -6 1 3.9 0.48
 -5 -6 1 3.59 0.32
 5 -6 -1 3.81 0.4
 5 -6 -1 3.57 0.43
 5 -6 -1 4.2 0.5
 5 -6 -1 3.45 0.46
 -5 -6 1 4.29 0.41
 5 -6 -1 4.21 0.4
 -5 -6 1 4.48 0.4
 -5 -6 1 4.55 0.38
 5 -6 -1 3.92 0.35
 -5 6 1 4.2 0.41
 -5 6 1 3.99 0.44
 -5 6 1 4.32 0.4
 -5 6 1 3.8 0.4
 -5 6 1 4.16 0.27
 -4 -6 1 24.63 0.91
 -4 -6 1 24.59 1.26
 -4 -6 1 26.47 0.93
 4 -6 -1 25.35 0.96
 -4 -6 1 25.35 0.85
 -4 -6 1 25.27 0.93
 4 -6 -1 25.65 1.08
 4 -6 -1 24.36 1.2
 -4 -6 1 26.99 2.39
 4 -6 -1 25.59 1
 4 -6 -1 26.85 1.05
 4 -6 -1 24.52 1.09
 -4 6 1 25.71 0.82
 -4 6 1 25.34 0.95
 -4 6 1 26.3 0.95
 -4 6 1 25.99 0.99
 -4 6 1 22.91 1.06
 -4 6 1 26.12 1.01
 3 -6 -1 1.61 0.36
 3 -6 -1 2.41 0.38
 -3 -6 1 2.16 0.21
 3 -6 -1 1.94 0.32
 3 -6 -1 2.44 0.37
 -3 -6 1 2 0.31
 -3 -6 1 2.12 0.32
 3 -6 -1 2.33 0.3
 -3 -6 1 2.59 0.41
 -3 -6 1 1.58 0.25
 -3 6 1 2.35 0.39
 -3 6 1 2.3 0.35
 -3 6 1 2.55 0.32
 -3 6 1 2.02 0.28
 -3 6 1 2.01 0.36
 2 -6 -1 2.57 0.3
 2 -6 -1 2.77 0.32
 -2 -6 1 2.26 0.26
 2 -6 -1 2.51 0.35
 -2 6 1 2.45 0.31
 -2 6 1 2.69 0.37
 2 6 -1 2.12 0.34
 -2 6 1 2.71 0.35
 1 -6 -1 6.64 0.44
 1 -6 -1 6.37 0.51
 1 -6 -1 6.49 0.42
 1 6 -1 6.38 0.48
 -1 6 1 7.28 0.51
 -1 6 1 6.29 0.46
 0 -6 1 0.72 0.21
 0 -6 -1 0.84 0.21
 0 -6 1 0.8 0.21
 0 6 -1 0.68 0.24
 0 6 -1 0.8 0.24
 0 6 1 0.99 0.24
 0 6 1 1.45 0.31
 1 -6 1 9.23 0.52
 1 -6 1 9.06 0.58
 1 -6 1 9.71 0.55
 -1 6 -1 9.4 0.54
 -1 6 -1 9.57 0.51
 -1 6 -1 8.68 0.58
 1 6 1 9.32 0.57
 2 -6 1 9.72 0.55
 2 -6 1 9.79 0.54
 2 -6 1 10.24 0.63
 -2 6 -1 9.89 0.58
 2 6 1 9.49 0.57
 -2 6 -1 9.23 0.53
 -2 6 -1 9.9 0.63
 -2 6 -1 10.19 0.67
 -3 6 -1 0.08 0.19
 -3 6 -1 0.15 0.19
 -3 6 -1 0.24 0.17
 -3 6 -1 0.02 0.18
 -4 -6 -1 11.8 0.38
 4 -6 1 11.71 0.56
 -4 -6 -1 11.77 0.62
 4 -6 1 11.97 0.73
 4 -6 1 12.24 0.63
 -4 -6 -1 11.25 0.57
 4 -6 1 11.84 0.66
 4 -6 1 13.29 0.65
 4 -6 1 11.77 0.67
 -4 -6 -1 11.96 1.57
 -4 -6 -1 11.53 0.59
 -4 -6 -1 11.96 0.69
 4 -6 1 11.91 0.71
 -4 -6 -1 12.75 0.84
 4 -6 1 11.93 0.72
 4 6 1 15.47 0.97
 -4 6 -1 12.79 0.58
 -4 6 -1 12 0.66
 -4 6 -1 12.8 0.68
 -4 6 -1 12.29 0.76
 -4 6 -1 13.14 0.68
 -5 -6 -1 3.4 0.36
 -5 -6 -1 3.99 0.37
 5 -6 1 3.47 0.37
 5 -6 1 2.73 0.43
 5 -6 1 3.17 0.42
 -5 -6 -1 3.17 0.47
 5 -6 1 2.97 0.43
 5 -6 1 3.27 0.37
 -5 -6 -1 2.98 0.36
 5 -6 1 3.77 0.43
 5 -6 1 2.94 0.42
 5 -6 1 3.35 0.34
 -5 -6 -1 3.31 0.33
 -5 6 -1 3.93 0.42
 -5 6 -1 3.55 0.4
 -5 6 -1 3.35 0.29
 -5 6 -1 2.92 0.38
 6 -6 1 3.01 0.42
 6 -6 1 2.85 0.41
 6 -6 1 2.64 0.42
 -6 -6 -1 2.77 0.33
 -6 -6 -1 2.81 0.44
 6 -6 1 2.92 0.32
 6 -6 1 3.09 0.38
 6 -6 1 3.2 0.42
 6 -6 1 2.72 0.37
 -6 -6 -1 2.28 0.28
 -6 -6 -1 3.08 0.36
 -6 -6 -1 2.87 0.33
 -6 6 -1 3.12 0.39
 -6 6 -1 2.93 0.4
 -6 6 -1 2.77 0.32
 7 -6 1 -0.03 0.2
 7 -6 1 0.01 0.19
 -7 -6 -1 -0.06 0.11
 7 -6 1 -0.22 0.14
 7 -6 1 0.21 0.17
 7 -6 1 -0.06 0.13
 -7 -6 -1 -0.05 0.15
 -7 -6 -1 -0.13 0.12
 -7 -6 -1 0.29 0.18
 -7 -6 -1 -0.1 0.15
 -7 -6 -1 0.05 0.14
 7 -6 1 -0.06 0.18
 -7 6 -1 0.11 0.11
 -7 6 -1 -0.01 0.2
 7 6 1 0.06 0.19
 7 6 1 -0.09 0.2
 -7 6 -1 -0.1 0.18
 -8 -6 -1 0.02 0.06
 -8 -6 -1 0.09 0.15
 -8 -6 -1 0.01 0.12
 -8 -6 -1 0.02 0.12
 8 -6 1 -0.14 0.18
 8 -6 1 0.35 0.22
 8 -6 1 0.81 0.22
 8 -6 1 -0.11 0.12
 -8 -6 -1 -0.07 0.12
 8 -6 1 0 0.11
 -8 -6 -1 0.04 0.15
 8 6 1 -0.01 0.16
 -8 6 -1 0.12 0.16
 -8 6 -1 0.04 0.15
 8 6 1 0.07 0.18
 -9 -6 -1 0.02 0.1
 -9 -6 -1 0.2 0.13
 -9 -6 -1 0.23 0.13
 -9 -6 -1 0.22 0.14
 9 -6 1 0.24 0.18
 9 6 1 0.35 0.14
 -9 6 -1 0.19 0.12
 9 6 1 0.19 0.15
 -9 6 -1 0.38 0.17
 8 -7 -1 17.67 0.6
 -8 -7 1 16.33 0.6
 -8 -7 1 16.29 0.81
 -8 -7 1 14.62 1.38
 -8 -7 1 16.27 0.55
 -8 7 1 15.85 0.62
 8 7 -1 17.04 0.66
 -8 7 1 16.14 0.57
 8 7 -1 17.27 0.59
 8 7 -1 16.5 0.84
 -7 -7 1 5.92 1.06
 -7 -7 1 7.56 0.58
 -7 -7 1 7.36 0.41
 7 -7 -1 7.27 0.45
 7 -7 -1 6.69 0.51
 -7 -7 1 7.02 0.45
 7 7 -1 7.91 0.45
 7 7 -1 8 0.65
 7 7 -1 7.65 0.49
 -7 7 1 7.49 0.52
 -7 7 1 6.91 0.45
 -7 7 1 7.06 0.48
 6 -7 -1 12.39 0.63
 -6 -7 1 12.75 1.55
 6 -7 -1 12.65 0.65
 -6 -7 1 13.03 0.46
 6 -7 -1 12.54 0.7
 -6 -7 1 12.58 0.58
 6 -7 -1 11.7 0.68
 6 -7 -1 12.74 0.73
 -6 -7 1 12.78 0.62
 -6 -7 1 12.96 0.82
 6 -7 -1 12.34 0.5
 6 -7 -1 12.98 0.61
 6 7 -1 12.83 0.62
 -6 7 1 12.83 0.66
 6 7 -1 13.14 0.69
 -6 7 1 12.17 0.58
 6 7 -1 13.15 0.9
 -6 7 1 14.59 0.49
 5 -7 -1 8.83 0.57
 5 -7 -1 9.04 0.62
 5 -7 -1 9.19 0.44
 -5 -7 1 8.06 1.36
 5 -7 -1 9.23 0.54
 -5 -7 1 9 0.45
 -5 -7 1 9.04 0.39
 5 -7 -1 9.03 0.56
 -5 -7 1 8.89 0.71
 -5 -7 1 9.24 0.55
 -5 -7 1 9.25 0.52
 5 -7 -1 9.13 0.55
 5 7 -1 9.08 0.54
 5 7 -1 9.11 0.6
 -5 7 1 9.91 0.51
 -5 7 1 9.58 0.55
 5 7 -1 9.77 0.79
 -5 7 1 9.52 0.61
 -4 -7 1 1.95 0.28
 -4 -7 1 2.26 0.34
 4 -7 -1 2.83 0.37
 4 -7 -1 2.68 0.42
 4 -7 -1 2.69 0.35
 -4 -7 1 3.52 0.45
 -4 -7 1 1.82 0.3
 4 -7 -1 2.76 0.39
 4 7 -1 2.85 0.42
 -4 7 1 3.77 0.42
 4 7 -1 1.93 0.31
 -4 7 1 2.22 0.35
 -4 7 1 2.42 0.35
 -4 7 1 2.81 0.28
 4 7 -1 2.05 0.48
 -4 7 1 2.38 0.35
 3 -7 -1 35.77 1.25
 3 -7 -1 35.9 1.22
 -3 -7 1 38.95 2.91
 -3 -7 1 35.99 1.19
 3 -7 -1 35.51 1.35
 -3 -7 1 34.57 1.11
 3 -7 -1 36.01 1.13
 -3 7 1 35.8 1.26
 -3 7 1 37.61 1.24
 3 7 -1 36.36 1.2
 -3 7 1 36.04 1.18
 3 7 -1 36.34 1.73
 -3 7 1 36.51 1.1
 3 7 -1 39.26 1.36
 -2 -7 1 5.17 0.42
 -2 -7 1 4.58 0.4
 2 -7 -1 4.67 0.38
 2 -7 -1 4.55 0.48
 -2 -7 1 4.5 0.3
 2 -7 -1 4.53 0.44
 2 -7 -1 4.47 0.47
 2 -7 -1 5.11 0.44
 2 7 -1 5.01 0.46
 -2 7 1 4.52 0.43
 -2 7 1 5.01 0.46
 -2 7 1 6 0.45
 2 7 -1 4.95 0.44
 2 7 -1 5.18 0.6
 -1 7 1 0.11 0.15
 1 7 -1 -0.02 0.16
 1 7 -1 0.11 0.19
 -1 7 1 0.02 0.17
 -1 7 1 0.08 0.14
 1 7 -1 -0.14 0.17
 1 7 -1 0.27 0.2
 -1 7 1 -0.3 0.18
 -1 7 1 0.36 0.23
 0 -7 -1 0.49 0.22
 0 -7 1 0.38 0.19
 0 -7 1 0.25 0.13
 0 -7 1 0.3 0.26
 0 -7 -1 0.4 0.17
 0 7 1 0.52 0.21
 0 7 -1 0.42 0.18
 0 7 1 0.3 0.16
 0 7 -1 0.45 0.2
 0 7 1 0.41 0.2
 0 7 -1 0.23 0.19
 0 7 1 0.35 0.21
 1 7 1 0.59 0.22
 -1 7 -1 1.66 0.3
 1 7 1 1.36 0.29
 1 7 1 1.1 0.23
 -1 7 -1 1 0.26
 1 7 1 1.07 0.28
 1 7 1 0.96 0.26
 -1 7 -1 1.26 0.28
 2 7 1 0.06 0.19
 -2 7 -1 0.17 0.14
 -2 7 -1 -0.05 0.19
 2 7 1 0.04 0.19
 -2 7 -1 0.14 0.23
 2 7 1 0.05 0.18
 2 7 1 0.18 0.18
 -2 7 -1 0.12 0.15
 -3 -7 -1 3.34 0.36
 3 -7 1 3.86 0.39
 3 -7 1 3.91 0.46
 -3 -7 -1 6.24 1.12
 -3 -7 -1 4.14 0.27
 3 -7 1 4.31 0.45
 3 -7 1 3.58 0.36
 3 -7 1 3.74 0.4
 -3 -7 -1 3.9 0.4
 3 7 1 4.62 0.57
 -3 7 -1 3.43 0.39
 3 7 1 4.28 0.45
 -3 7 -1 4.59 0.49
 3 7 1 4.72 0.45
 -3 7 -1 4.21 0.44
 3 7 1 4.1 0.41
 -3 7 -1 4.32 0.38
 4 -7 1 40.44 1.23
 -4 -7 -1 41.91 3.23
 4 -7 1 42.93 1.51
 4 -7 1 40.36 1.33
 4 -7 1 41.06 1.39
 -4 -7 -1 42.22 1.31
 -4 -7 -1 41.21 1.23
 -4 7 -1 43.86 1.35
 -4 7 -1 41.61 1.43
 4 7 1 43.87 1.91
 -4 7 -1 43.03 1.4
 4 7 1 41.74 1.46
 4 7 1 42.31 1.34
 -4 7 -1 42.02 1.19
 5 -7 1 0.55 0.21
 -5 -7 -1 0.5 0.2
 5 -7 1 0.48 0.24
 -5 -7 -1 0.51 0.16
 5 -7 1 0.65 0.23
 -5 -7 -1 0.46 0.2
 5 -7 1 0.36 0.2
 -5 -7 -1 0.48 0.2
 5 7 1 0.53 0.2
 -5 7 -1 0.59 0.24
 5 7 1 0.32 0.19
 -5 7 -1 0.55 0.21
 5 7 1 0.52 0.26
 -5 7 -1 0.48 0.13
 -6 -7 -1 14.05 0.89
 6 -7 1 13.54 0.67
 6 -7 1 14.76 0.64
 6 -7 1 12.24 0.72
 -6 -7 -1 14.39 0.64
 -6 -7 -1 15.23 1.66
 -6 -7 -1 15.28 0.67
 -6 -7 -1 14.74 0.55
 6 -7 1 15.15 0.77
 -6 7 -1 14.43 0.7
 6 7 1 14.4 0.94
 -6 7 -1 15.59 0.58
 6 7 1 15.54 0.68
 6 7 1 15.46 0.73
 -7 -7 -1 10.73 0.73
 -7 -7 -1 11.94 0.56
 -7 -7 -1 11.78 0.37
 7 -7 1 11.6 0.64
 7 -7 1 11.44 0.52
 -7 -7 -1 11.38 0.52
 -7 -7 -1 10.58 1.31
 7 7 1 12.05 0.57
 7 7 1 12.19 0.78
 -7 7 -1 12.43 0.6
 -7 7 -1 11.99 0.6
 7 7 1 11.48 0.59
 -8 -7 -1 6.9 0.35
 -8 -7 -1 6.23 0.48
 -8 -7 -1 5.79 0.89
 8 -7 1 6.52 0.35
 -8 -7 -1 6.35 0.37
 8 7 1 7.18 0.51
 -8 7 -1 6.68 0.39
 8 7 1 6.7 0.37
 -8 7 -1 6.75 0.37
 8 7 1 6.71 0.4
 6 -8 -1 14.59 0.69
 6 -8 -1 14.73 0.53
 -6 -8 1 13.96 1.45
 -6 -8 1 15.28 0.59
 6 8 -1 14.86 0.81
 6 8 -1 15.83 0.59
 -6 8 1 14.66 0.62
 6 8 -1 15.11 0.63
 5 -8 -1 15.13 0.74
 5 -8 -1 15.18 0.68
 -5 -8 1 14.68 0.63
 5 -8 -1 14.64 0.56
 -5 -8 1 14.46 0.5
 -5 -8 1 14.37 1.57
 -5 8 1 15.01 0.54
 -5 8 1 15.79 0.69
 5 8 -1 15.77 0.64
 5 8 -1 16.21 0.69
 5 8 -1 15.98 0.9
 -4 -8 1 11.5 0.5
 4 -8 -1 10.96 0.49
 -4 -8 1 11.5 1.47
 -4 -8 1 11.24 0.45
 4 -8 -1 10.4 0.58
 4 -8 -1 11.34 0.6
 4 -8 -1 11.71 0.66
 -4 -8 1 11.05 0.57
 -4 8 1 12.53 0.57
 4 8 -1 11.85 0.57
 4 8 -1 11.42 0.6
 -4 8 1 12.13 0.63
 4 8 -1 11.02 0.77
 4 8 -1 11.95 0.62
 3 -8 -1 19.94 0.79
 -3 -8 1 19.19 0.59
 -3 -8 1 18.24 0.77
 -3 -8 1 19.33 0.75
 3 -8 -1 19.57 0.67
 -3 -8 1 19.13 1.99
 3 -8 -1 20.02 0.9
 3 -8 -1 18.04 0.78
 -3 -8 1 18.94 0.71
 3 -8 -1 17.48 0.8
 -3 8 1 20.68 0.79
 -3 8 1 20.32 0.68
 3 8 -1 20.58 1.1
 -3 8 1 21.84 0.88
 3 8 -1 19.55 0.79
 3 8 -1 19.97 0.84
 -3 8 1 21.49 0.83
 3 8 -1 19.17 0.84
 2 -8 -1 2.7 0.36
 -2 -8 1 2.2 0.33
 -2 -8 1 2.99 0.34
 2 -8 -1 2.15 0.37
 -2 -8 1 2.1 0.34
 2 -8 -1 2.07 0.25
 2 -8 -1 2.23 0.34
 2 -8 -1 2.59 0.37
 2 8 -1 2.68 0.35
 -2 8 1 2.69 0.39
 2 8 -1 2.03 0.32
 -2 8 1 2.27 0.36
 2 8 -1 2.41 0.42
 2 8 -1 2.28 0.35
 -2 8 1 2.72 0.3
 -2 8 1 2.32 0.33
 1 -8 -1 29.6 1
 -1 -8 1 28.23 1.1
 1 -8 -1 30.18 0.83
 -1 -8 1 30.92 1.05
 -1 -8 1 30.75 0.84
 1 8 -1 31.32 1.44
 -1 8 1 32.54 1.14
 -1 8 1 31.77 1.07
 1 8 -1 31.05 1.12
 -1 8 1 29.89 1.02
 1 8 -1 31.69 1.1
 0 -8 -1 8.72 0.48
 0 -8 1 9.06 0.62
 0 -8 -1 8.06 0.6
 0 -8 1 8.9 0.45
 0 8 1 9.45 0.56
 0 8 1 9.51 0.48
 0 8 -1 10.38 0.62
 0 8 -1 10.2 0.53
 0 8 1 9.33 0.58
 0 8 1 10.48 0.63
 0 8 -1 9.39 0.66
 0 8 1 9.8 0.62
 0 8 -1 9.76 0.6
 1 -8 1 10.19 0.68
 1 -8 1 10.28 0.51
 -1 -8 -1 9.92 0.63
 -1 -8 -1 10.6 0.48
 -1 8 -1 11.8 0.61
 1 8 1 11.02 0.59
 1 8 1 10.2 0.67
 1 8 1 10.62 0.71
 -1 8 -1 10.81 0.49
 -1 8 -1 10.67 0.62
 1 8 1 10.01 0.61
 1 8 1 11.21 0.56
 -1 8 -1 11.67 0.64
 2 8 1 -0.05 0.14
 2 8 1 -0.02 0.17
 -2 8 -1 0.03 0.17
 -2 8 -1 -0.01 0.15
 2 8 1 0.02 0.17
 2 8 1 0.01 0.15
 -3 -8 -1 6.58 0.45
 3 -8 1 5.24 0.48
 3 -8 1 6.43 0.54
 3 -8 1 5.9 0.43
 3 -8 1 5.75 0.34
 -3 -8 -1 5.5 1.25
 -3 -8 -1 6.07 0.42
 3 -8 1 6.35 0.47
 -3 -8 -1 6.4 0.47
 3 8 1 6.19 0.48
 3 8 1 5.56 0.44
 3 8 1 5.93 0.55
 -3 8 -1 6.26 0.49
 3 8 1 6.11 0.45
 3 8 1 6.22 0.44
 -3 8 -1 6.35 0.48
 -3 8 -1 5.95 0.38
 -4 -8 -1 5.39 0.37
 -4 -8 -1 5.37 0.37
 -4 -8 -1 6.07 0.43
 -4 -8 -1 4.46 1.09
 4 -8 1 4.91 0.47
 4 -8 1 5.5 0.44
 4 -8 1 5.41 0.34
 4 -8 1 5.11 0.44
 4 8 1 6.33 0.44
 -4 8 -1 6.3 0.31
 4 8 1 4.91 0.44
 4 8 1 6.37 0.56
 4 8 1 5.89 0.43
 -4 8 -1 5.74 0.46
 -4 8 -1 5.9 0.44
 4 8 1 5.22 0.41
 -5 -8 -1 15.78 0.56
 5 -8 1 15.87 0.76
 -5 -8 -1 16.6 0.66
 5 -8 1 15.66 0.55
 5 -8 1 15.25 0.66
 -5 -8 -1 14.35 1.56
 5 8 1 16.48 0.66
 5 8 1 16.24 0.68
 5 8 1 15.69 0.64
 -5 8 -1 15.21 0.68
 5 8 1 16.13 0.68
 -5 8 -1 15.83 0.59
 5 8 1 16.01 0.88
 -6 -8 -1 9.09 1.14
 -6 -8 -1 9.2 0.33
 6 -8 1 8.77 0.37
 6 -8 1 9.2 0.53
 6 -8 1 10.11 0.5
 -6 -8 -1 9.69 0.45
 6 8 1 9.98 0.45
 6 8 1 9.82 0.48
 6 8 1 9.64 0.6
 6 8 1 9.09 0.47
 6 8 1 9.29 0.45
 -6 8 -1 8.9 0.49
 -4 -9 1 13.08 0.43
 -4 -9 1 14.06 1.4
 4 -9 -1 13.94 0.51
 4 9 -1 13.62 0.57
 -4 9 1 14.65 0.47
 -4 9 1 14.19 0.58
 4 9 -1 14.3 0.53
 4 9 -1 13.87 0.68
 -3 -9 1 -0.26 0.18
 3 -9 -1 0.23 0.14
 3 -9 -1 0.02 0.19
 -3 -9 1 0.13 0.11
 3 -9 -1 0.29 0.19
 3 9 -1 0.23 0.17
 -3 9 1 -0.1 0.14
 3 9 -1 -0.06 0.1
 3 9 -1 0.08 0.12
 -3 9 1 0.06 0.15
 -2 -9 1 24.7 0.82
 -2 -9 1 24.87 0.79
 2 -9 -1 24.98 0.87
 2 -9 -1 25.22 0.77
 2 9 -1 25.81 1.07
 2 9 -1 25.12 0.81
 -2 9 1 25.11 0.9
 -2 9 1 25.6 0.72
 2 9 -1 25.62 0.9
 -2 9 1 26.67 0.88
 2 9 -1 25.24 0.86
 1 -9 -1 2.99 0.42
 -1 -9 1 3.23 0.34
 -1 -9 1 3.61 0.34
 1 -9 -1 3.18 0.26
 -1 -9 1 3.33 0.27
 1 -9 -1 3.23 0.36
 -1 9 1 3.9 0.4
 1 9 -1 3.74 0.37
 1 9 -1 3.54 0.34
 -1 9 1 3.35 0.35
 -1 9 1 3.95 0.3
 0 -9 -1 29.18 0.92
 0 -9 1 29.08 1.02
 0 -9 -1 29.27 0.76
 0 -9 1 27.93 0.95
 0 -9 -1 28.5 1.04
 0 -9 1 28.08 0.88
 0 9 1 28.64 0.98
 0 9 -1 29.86 0.92
 0 9 -1 29.09 0.99
 0 9 1 30.18 0.91
 0 9 1 28.53 0.9
 -1 -9 -1 3.08 0.35
 1 -9 1 2.86 0.38
 -1 -9 -1 2.52 0.28
 1 -9 1 3.14 0.22
 1 -9 1 3.08 0.33
 -1 -9 -1 2.58 0.35
 1 9 1 2.72 0.34
 1 9 1 2.97 0.31
 -1 9 -1 3.36 0.36
 1 9 1 3.58 0.33
 -1 9 -1 3.48 0.3
 -2 -9 -1 3.95 0.34
 2 -9 1 2.97 0.34
 2 -9 1 3.6 0.43
 -2 -9 -1 3.74 0.33
 -2 -9 -1 3.83 0.25
 2 -9 1 3.92 0.26
 2 9 1 3.91 0.36
 -2 9 -1 4.39 0.37
 -2 9 -1 3.89 0.29
 2 9 1 3.98 0.37
 2 9 1 3.99 0.32
 -2 9 -1 3.9 0.38
 -3 -9 -1 7.62 1.13
 3 -9 1 7.01 0.49
 -3 -9 -1 7.9 0.4
 3 -9 1 9.11 0.47
 3 -9 1 8.04 0.38
 -3 -9 -1 8.36 0.38
 -3 9 -1 8.97 0.31
 3 9 1 7.91 0.42
 -3 9 -1 8.5 0.49
 3 9 1 8.39 0.46
 3 9 1 8.42 0.45
 -3 9 -1 8.09 0.46
 3 9 1 8.47 0.36
 3 9 1 9.08 0.49
 -4 -9 -1 8.57 1.14
 4 -9 1 8.16 0.37
 4 -9 1 7.74 0.44
 -4 -9 -1 8.32 0.35
 4 9 1 8.14 0.43
 4 9 1 8.48 0.39
 4 9 1 8.04 0.43
 -4 9 -1 7.91 0.37
 -4 9 -1 8.54 0.44
 4 9 1 8.11 0.34
 -11 0 2 40.53 1.2
 -11 0 2 41.33 1.25
 11 0 -2 38.94 1.07
 -11 0 2 41.5 1.21
 -11 0 2 40.58 1.64
 -11 0 2 40.99 1.1
 -10 0 2 0.09 0.18
 -10 0 2 0.17 0.18
 10 0 -2 0.21 0.15
 -10 0 2 0.29 0.14
 -10 0 2 0.22 0.19
 -10 0 2 0.09 0.14
 -9 0 2 42.2 1.77
 -9 0 2 42.28 1.39
 -9 0 2 41.94 1.34
 9 0 -2 42.23 1.18
 -9 0 2 44.1 1.03
 -9 0 2 43.09 1.35
 -9 0 2 42.05 1.22
 -8 0 2 5.52 0.48
 -8 0 2 5.86 0.31
 -8 0 2 5.83 0.45
 -8 0 2 4.8 0.34
 -8 0 2 6.16 0.46
 -8 0 2 6.21 0.47
 -8 0 2 5.13 0.42
 7 0 -2 64.69 1.91
 6 0 -2 1.05 0.17
 6 0 -2 1.26 0.16
 5 0 -2 2.96 0.17
 5 0 -2 3.05 0.21
 5 0 -2 2.51 0.24
 4 0 -2 0.45 0.09
 4 0 -2 0.4 0.06
 3 0 -2 134.89 3.4
 -3 0 2 135.14 3.24
 3 0 -2 142.47 3.4
 -2 0 2 315.22 7.28
 -1 0 2 69.7 1.66
 0 0 -2 105.1 2.6
 1 0 2 319.63 7.82
 -1 0 -2 315.78 7.81
 2 0 2 64.4 1.69
 3 0 2 529.63 13.05
 4 0 2 0.07 0.08
 5 0 2 283.17 7.08
 5 0 2 292.73 7.29
 6 0 2 0.55 0.14
 6 0 2 0.5 0.16
 7 0 2 76.37 1.78
 7 0 2 76 2.28
 -8 0 -2 79.63 2.11
 8 0 2 80.17 1.9
 -8 0 -2 79 2.08
 -8 0 -2 80.31 2.04
 -8 0 -2 78.44 2.95
 -8 0 -2 77.8 2.13
 -8 0 -2 80.24 1.95
 -9 0 -2 22.89 0.76
 9 0 2 24.41 0.78
 -9 0 -2 20.54 0.89
 -9 0 -2 21.29 0.86
 -9 0 -2 22.34 0.83
 -9 0 -2 22.68 0.9
 -9 0 -2 21.76 1.17
 10 0 2 12.61 0.54
 10 0 2 13.1 0.72
 -10 0 -2 12.87 0.5
 -10 0 -2 13.79 0.61
 -10 0 -2 12.73 0.84
 -10 0 -2 12.38 0.66
 -10 0 -2 12.9 0.64
 -10 0 -2 12.45 0.63
 -11 0 -2 8.01 0.49
 -11 0 -2 7.62 0.6
 -11 0 -2 8.43 0.43
 -11 0 -2 8.69 0.47
 11 0 2 8.43 0.67
 11 0 2 8.74 0.53
 -11 0 -2 8.97 0.47
 11 -1 -2 18.76 0.8
 -11 -1 2 16.88 0.88
 -11 -1 2 18.3 0.73
 11 -1 -2 16.14 0.58
 -11 -1 2 16.96 0.68
 -11 -1 2 16.98 0.58
 -11 -1 2 17.88 0.71
 -11 1 2 18.23 0.74
 -11 1 2 17.63 0.62
 -11 1 2 17.77 0.69
 -11 1 2 17.99 0.71
 -11 1 2 17.53 0.91
 -10 -1 2 11.6 0.63
 -10 -1 2 11.01 0.73
 -10 -1 2 12.26 0.51
 -10 -1 2 11.44 0.6
 -10 -1 2 11.79 0.65
 10 -1 -2 11.91 0.51
 -10 1 2 10.9 0.6
 -10 1 2 12.29 0.77
 -10 1 2 11.56 0.62
 -10 1 2 10.98 0.52
 -10 1 2 11.01 0.63
 10 1 -2 11.58 0.5
 -9 -1 2 6.94 0.52
 -9 -1 2 7.69 0.51
 -9 -1 2 6.88 0.57
 -9 -1 2 7.39 0.4
 9 -1 -2 7.89 0.4
 -9 -1 2 7.26 0.52
 -9 -1 2 7.46 0.24
 -9 1 2 7.31 0.55
 -9 1 2 8 0.36
 -9 1 2 7.39 0.61
 -9 1 2 7.82 0.45
 -9 1 2 7.8 0.52
 -9 1 2 8.09 0.54
 -9 1 2 8.47 0.57
 -8 -1 2 93.29 2.08
 8 -1 -2 96.42 2.66
 -8 -1 2 95.47 2.44
 -8 -1 2 92.84 2.25
 -8 -1 2 93.11 2.4
 -8 -1 2 93.98 3.34
 -8 -1 2 94.93 2.4
 8 -1 -2 101.22 2.25
 -8 1 2 97.33 2.19
 -8 1 2 95.19 2.5
 -8 1 2 94.52 3.38
 -8 1 2 94.54 2.3
 -8 1 2 96.77 2.42
 -8 1 2 93.69 2.4
 7 -1 -2 0.77 0.23
 7 -1 -2 0.94 0.2
 7 -1 -2 0.78 0.19
 7 -1 -2 1.32 0.26
 7 1 -2 0.95 0.18
 6 -1 -2 89.6 2.52
 6 -1 -2 91.43 2.4
 6 -1 -2 89.65 2.49
 6 1 -2 83.89 2.27
 -6 1 2 82.32 2.11
 5 -1 -2 18.11 0.64
 5 -1 -2 18.41 0.59
 5 -1 -2 17.18 0.69
 5 1 -2 18.7 0.56
 5 1 -2 18.7 0.61
 -5 1 2 17.44 0.62
 4 -1 -2 12.78 0.45
 4 -1 -2 12.18 0.41
 4 -1 -2 12.17 0.5
 4 1 -2 12.7 0.41
 -4 1 2 12.3 0.45
 -4 1 2 12.02 0.43
 4 1 -2 12.35 0.34
 3 -1 -2 176.79 4.45
 3 -1 -2 179.7 4.33
 3 1 -2 176.97 4.44
 -3 1 2 182.95 4.56
 3 1 -2 180.94 4.44
 -3 1 2 181.44 4.09
 2 -1 -2 127.99 3.04
 2 -1 -2 121.92 3.12
 -2 1 2 129.55 3.08
 1 -1 -2 28.43 0.76
 -1 1 2 30.42 0.8
 0 -1 -2 10.85 0.34
 0 1 2 10.73 0.33
 1 -1 2 48.3 1.28
 -1 -1 -2 49.43 1.27
 1 1 2 52.38 1.27
 2 -1 2 18.32 0.54
 2 -1 2 17.9 0.57
 -2 1 -2 9.74 0.32
 3 -1 2 3.54 0.22
 3 -1 2 3.4 0.2
 -3 1 -2 3.57 0.17
 -3 1 -2 3.81 0.21
 3 1 2 3.81 0.22
 4 -1 2 495.54 11.8
 4 -1 2 458.97 11.48
 4 -1 2 468.83 11.49
 4 1 2 493.54 12.09
 -4 1 -2 481.07 10.77
 5 -1 2 139.54 3.7
 5 -1 2 145.97 3.77
 5 -1 2 141.88 3.51
 -5 1 -2 141.2 3.41
 5 1 2 148.94 3.82
 6 -1 2 13.65 0.65
 6 -1 2 14.04 0.65
 6 -1 2 14.1 0.65
 6 -1 2 15.58 0.5
 6 1 2 15.59 0.54
 7 -1 2 1.03 0.17
 7 -1 2 0.75 0.21
 7 -1 2 1.31 0.26
 7 -1 2 1.12 0.24
 7 1 2 1.15 0.19
 -8 -1 -2 48.2 1.38
 -8 -1 -2 48.33 1.31
 8 -1 2 50.39 1.29
 -8 -1 -2 49.54 1.99
 -8 -1 -2 47.84 1.47
 -8 -1 -2 48.64 1.44
 -8 -1 -2 49.06 1.46
 -8 1 -2 51.84 2.07
 -8 1 -2 49.84 1.37
 -8 1 -2 49.7 1.46
 -8 1 -2 49.57 1.52
 -8 1 -2 48.98 1.43
 -8 1 -2 48.63 1.47
 8 1 2 47.37 1.29
 -9 -1 -2 33.18 0.99
 -9 -1 -2 35.14 1.1
 -9 -1 -2 32.88 1.15
 9 -1 2 35.05 1
 -9 -1 -2 34.09 1.14
 -9 -1 -2 33.91 1.56
 -9 -1 -2 35.23 1.2
 -9 1 -2 35.15 1.62
 -9 1 -2 34.56 1.13
 -9 1 -2 35.01 1.16
 9 1 2 36.29 1.03
 -9 1 -2 33.36 1.18
 -9 1 -2 35.14 1.16
 -9 1 -2 32.99 1.04
 -9 1 -2 34.72 1.21
 10 -1 2 14.17 0.98
 -10 -1 -2 14.81 0.5
 -10 -1 -2 14.91 0.63
 -10 -1 -2 14.63 0.67
 10 -1 2 14.93 0.79
 10 -1 2 14.76 0.77
 10 -1 2 14.24 0.56
 -10 -1 -2 14.42 0.69
 -10 -1 -2 14.47 0.68
 -10 -1 -2 14.9 0.9
 -10 1 -2 14.47 0.64
 -10 1 -2 14.62 0.66
 -10 1 -2 14.93 0.91
 -10 1 -2 14.81 0.69
 -10 1 -2 14.68 0.7
 -10 1 -2 14.93 0.56
 -11 -1 -2 6.06 0.4
 -11 -1 -2 5.47 0.35
 -11 -1 -2 5.52 0.42
 -11 -1 -2 5.61 0.38
 11 -1 2 5.66 0.56
 -11 -1 -2 5.83 0.51
 11 -1 2 5.64 0.47
 11 -1 2 6.2 0.44
 11 1 2 5.31 0.43
 -11 1 -2 5.81 0.38
 -11 1 -2 6.52 0.38
 -11 1 -2 5.67 0.52
 11 1 2 5.08 0.56
 -11 1 -2 5.65 0.42
 -11 1 -2 7.2 0.42
 -11 -2 2 1.2 0.18
 11 -2 -2 1.03 0.25
 11 -2 -2 0.74 0.24
 -11 -2 2 0.72 0.18
 -11 -2 2 0.95 0.19
 -11 -2 2 0.66 0.17
 11 -2 -2 1.05 0.18
 -11 -2 2 1.22 0.23
 11 -2 -2 0.76 0.21
 -11 2 2 0.6 0.17
 -11 2 2 0.86 0.16
 -11 2 2 0.76 0.19
 -11 2 2 1.27 0.22
 -11 2 2 1.08 0.23
 -10 -2 2 34.12 1.45
 -10 -2 2 33.32 0.98
 -10 -2 2 32.62 1.09
 -10 -2 2 33.25 1.14
 -10 -2 2 34.19 1.12
 10 -2 -2 32.62 0.96
 -10 2 2 33.93 1.16
 -10 2 2 33.68 1.51
 -10 2 2 35.14 1.06
 -10 2 2 34.44 1.13
 -10 2 2 34.27 1.11
 -10 2 2 33.91 0.81
 9 -2 -2 9.52 0.44
 -9 -2 2 9.64 0.46
 9 -2 -2 9.45 0.64
 -9 -2 2 9.38 0.58
 9 -2 -2 9.14 0.55
 -9 -2 2 9.31 0.57
 -9 -2 2 9.84 0.57
 -9 -2 2 9.05 0.64
 -9 2 2 9.65 0.6
 -9 2 2 9.63 0.44
 -9 2 2 9.93 0.58
 -9 2 2 9.59 0.72
 -9 2 2 10.24 0.6
 -9 2 2 9.67 0.51
 -8 -2 2 2.11 0.34
 -8 -2 2 2.31 0.18
 8 -2 -2 2.87 0.38
 8 -2 -2 2.13 0.38
 -8 -2 2 2.36 0.34
 -8 -2 2 2.14 0.31
 -8 -2 2 2.02 0.23
 8 -2 -2 2.31 0.34
 8 -2 -2 2.53 0.26
 -8 -2 2 2.17 0.33
 -8 2 2 2.19 0.38
 -8 2 2 2.36 0.27
 -8 2 2 2.43 0.38
 -8 2 2 2.49 0.27
 -8 2 2 2.56 0.34
 -8 2 2 2.61 0.36
 7 -2 -2 40.28 1.05
 7 -2 -2 40.48 1.36
 7 -2 -2 39.27 1.28
 7 -2 -2 40.11 1.42
 7 -2 -2 38.26 1.36
 -7 2 2 41.27 1.28
 -7 2 2 39.46 1.29
 6 -2 -2 2.76 0.28
 6 -2 -2 2.4 0.24
 6 -2 -2 2.12 0.29
 6 -2 -2 2.08 0.21
 -6 2 2 2.6 0.28
 5 -2 -2 51.5 1.52
 5 -2 -2 51.48 1.38
 5 -2 -2 52.69 1.59
 5 -2 -2 49.77 1.33
 5 -2 -2 52.17 1.46
 -5 2 2 52.87 1.46
 4 -2 -2 12.58 0.56
 4 -2 -2 12.76 0.47
 4 -2 -2 12.91 0.48
 4 -2 -2 13.04 0.51
 -4 2 2 12.9 0.5
 -4 2 2 12.76 0.5
 3 -2 -2 12.15 0.45
 3 -2 -2 11.85 0.42
 3 -2 -2 12.05 0.5
 -3 2 2 13.04 0.48
 -3 2 2 12.9 0.48
 2 -2 -2 373.09 8.92
 2 -2 -2 346.26 8.69
 -2 2 2 379.24 9.23
 -2 2 2 393.48 8.88
 -2 2 2 369.23 8.42
 1 -2 -2 200.46 4.96
 1 -2 -2 206.34 5.09
 -1 2 2 215.38 5.09
 0 -2 -2 55.24 1.45
 0 -2 -2 57.28 1.5
 0 2 2 61.93 1.57
 -1 -2 -2 3.94 0.21
 1 -2 2 4.07 0.22
 1 2 2 4.05 0.21
 2 -2 2 0.11 0.09
 2 -2 2 -0.01 0.07
 2 -2 2 0.01 0.08
 -2 2 -2 0.04 0.07
 -2 2 -2 0.1 0.08
 -2 2 -2 0.09 0.08
 2 2 2 -0.02 0.05
 3 -2 2 12.02 0.51
 3 -2 2 11.93 0.46
 3 -2 2 12.95 0.5
 -3 2 -2 13 0.48
 -3 2 -2 13.68 0.5
 4 -2 2 51.77 1.44
 4 -2 2 49.45 1.51
 4 -2 2 51.91 1.51
 4 -2 2 51.08 1.32
 -4 2 -2 52.24 1.43
 -4 2 -2 55.74 1.46
 5 -2 2 5.7 0.38
 5 -2 2 5.77 0.39
 5 -2 2 6.26 0.35
 5 -2 2 6.43 0.36
 5 -2 2 6.2 0.39
 5 -2 2 6.14 0.33
 -5 2 -2 6.51 0.37
 6 -2 2 64.1 1.51
 6 -2 2 63.49 1.87
 6 -2 2 66.42 1.97
 6 -2 2 62.28 1.95
 -6 2 -2 65.3 1.82
 6 2 2 67.62 1.58
 7 -2 2 0.52 0.14
 7 -2 2 0.48 0.2
 7 -2 2 0.52 0.19
 7 -2 2 0.29 0.18
 7 -2 2 0.47 0.19
 -7 2 -2 0.54 0.22
 7 2 2 0.54 0.15
 8 -2 2 1 0.19
 8 -2 2 1.18 0.31
 -8 -2 -2 1.13 0.2
 -8 -2 -2 1.21 0.23
 -8 -2 -2 0.9 0.24
 -8 -2 -2 1.25 0.26
 -8 -2 -2 1.22 0.27
 -8 -2 -2 0.64 0.22
 8 -2 2 1.2 0.27
 -8 2 -2 1.14 0.26
 -8 2 -2 0.94 0.24
 -8 2 -2 2.59 0.5
 -8 2 -2 0.72 0.23
 8 2 2 0.94 0.2
 -8 2 -2 1.29 0.24
 -8 2 -2 1.09 0.28
 -9 -2 -2 10.58 0.76
 9 -2 2 11.96 0.7
 -9 -2 -2 10.71 0.61
 -9 -2 -2 10.86 0.59
 -9 -2 -2 11.11 0.62
 9 -2 2 10.6 0.48
 -9 -2 -2 10.74 0.54
 9 -2 2 10.35 0.67
 -9 -2 -2 10.08 0.46
 9 -2 2 11.54 0.89
 -9 2 -2 11.56 0.6
 -9 2 -2 10.83 0.55
 -9 2 -2 12.61 0.67
 -9 2 -2 9.83 0.58
 -9 2 -2 11.13 0.61
 -9 2 -2 11.37 0.84
 10 -2 2 3.32 0.41
 -10 -2 -2 3.06 0.31
 -10 -2 -2 3.58 0.45
 -10 -2 -2 3.34 0.19
 10 -2 2 3.57 0.43
 -10 -2 -2 3.7 0.38
 10 -2 2 3.14 0.27
 -10 -2 -2 3.31 0.35
 10 -2 2 3.55 0.53
 -10 -2 -2 3.11 0.36
 -10 2 -2 3.05 0.35
 -10 2 -2 2.76 0.28
 -10 2 -2 3.48 0.38
 -10 2 -2 3.13 0.34
 -10 2 -2 2.88 0.43
 -10 2 -2 2.9 0.33
 11 -2 2 10.68 0.72
 -11 -2 -2 11.5 0.53
 -11 -2 -2 11.48 0.51
 -11 -2 -2 10.6 0.67
 -11 -2 -2 12 0.48
 11 -2 2 11.41 0.56
 11 -2 2 11.37 0.6
 -11 2 -2 11.4 0.49
 11 2 2 11.82 0.6
 -11 2 -2 10.73 0.29
 -11 2 -2 11.31 0.71
 11 2 2 10.93 0.74
 -11 2 -2 11.61 0.54
 -11 2 -2 11.23 0.5
 -11 -3 2 0.11 0.13
 11 -3 -2 -0.01 0.12
 -11 -3 2 -0.01 0.08
 11 -3 -2 -0.12 0.13
 -11 -3 2 0 0.12
 11 -3 -2 0.18 0.16
 -11 -3 2 0.03 0.08
 -11 3 2 -0.11 0.13
 -11 3 2 0.16 0.11
 -11 3 2 -0.05 0.1
 -11 3 2 0.12 0.13
 -11 3 2 -0.04 0.11
 10 -3 -2 1.35 0.28
 -10 -3 2 1 0.17
 -10 -3 2 1.53 0.31
 10 -3 -2 0.96 0.29
 -10 -3 2 1.02 0.22
 10 -3 -2 1.07 0.24
 -10 -3 2 1.17 0.24
 10 -3 -2 1.37 0.21
 -10 3 2 1.1 0.17
 -10 3 2 1.15 0.23
 -10 3 2 1.5 0.28
 -10 3 2 1.45 0.34
 -10 3 2 1.14 0.24
 -10 3 2 1.34 0.23
 -10 3 2 1.45 0.25
 -9 -3 2 4.32 0.46
 9 -3 -2 3.53 0.5
 9 -3 -2 4.36 0.4
 9 -3 -2 5.08 0.49
 -9 -3 2 4.62 0.43
 -9 -3 2 4.84 0.33
 -9 -3 2 4.71 0.42
 9 -3 -2 5.06 0.33
 -9 -3 2 5.37 0.44
 -9 3 2 4.82 0.43
 -9 3 2 4.64 0.37
 -9 3 2 5.01 0.42
 -9 3 2 5.86 0.5
 -9 3 2 4.79 0.55
 -9 3 2 4.7 0.34
 8 -3 -2 0.29 0.18
 -8 -3 2 0.25 0.17
 -8 -3 2 0.18 0.13
 8 -3 -2 0.42 0.16
 -8 -3 2 0.2 0.21
 -8 -3 2 0.13 0.08
 -8 -3 2 0.13 0.13
 8 -3 -2 0.21 0.21
 -8 -3 2 0.16 0.18
 8 -3 -2 -0.03 0.19
 -8 3 2 0.04 0.2
 -8 3 2 0.33 0.18
 -8 3 2 0.3 0.15
 -8 3 2 0.01 0.2
 -8 3 2 0.5 0.2
 -8 3 2 0.27 0.15
 -8 3 2 0.08 0.16
 -7 -3 2 2.53 0.21
 7 -3 -2 2.42 0.34
 7 -3 -2 2.54 0.31
 7 -3 -2 2.66 0.36
 7 -3 -2 2.72 0.32
 -7 -3 2 2.41 0.35
 7 -3 -2 2.47 0.35
 7 -3 -2 2.59 0.24
 -7 -3 2 2.59 0.33
 -7 -3 2 2.59 0.37
 -7 -3 2 2.44 0.36
 -7 -3 2 2.06 0.24
 -7 3 2 2.88 0.43
 -7 3 2 2.83 0.39
 -7 3 2 2.86 0.31
 -7 3 2 2.95 0.35
 -7 3 2 3.06 0.38
 -7 3 2 2.56 0.35
 -7 3 2 2.26 0.3
 -7 3 2 2.79 0.34
 6 -3 -2 2.66 0.3
 6 -3 -2 2.61 0.23
 6 -3 -2 2.84 0.34
 6 -3 -2 2.64 0.27
 6 -3 -2 2.53 0.28
 6 -3 -2 2.8 0.32
 6 -3 -2 3.15 0.33
 6 -3 -2 2.94 0.3
 6 -3 -2 2.68 0.35
 -6 3 2 3.08 0.33
 5 -3 -2 16.02 0.74
 5 -3 -2 16.82 0.53
 5 -3 -2 16.61 0.65
 5 -3 -2 16.46 0.7
 5 -3 -2 15.96 0.63
 5 -3 -2 17.38 0.66
 -5 3 2 18.14 0.72
 4 -3 -2 10.65 0.55
 4 -3 -2 11.2 0.51
 4 -3 -2 11.06 0.47
 4 -3 -2 10.43 0.48
 4 -3 -2 11.59 0.48
 -4 3 2 11.04 0.5
 -4 3 2 10.86 0.5
 3 -3 -2 4.36 0.27
 3 -3 -2 4.28 0.28
 3 -3 -2 4.31 0.29
 3 -3 -2 3.84 0.3
 -3 3 2 4.2 0.27
 3 3 -2 4.25 0.26
 -3 3 2 4.33 0.3
 2 -3 -2 0.05 0.09
 2 -3 -2 0.51 0.13
 2 -3 -2 0.09 0.1
 2 -3 -2 0.09 0.09
 2 3 -2 0.18 0.09
 -2 3 2 0.05 0.07
 -2 3 2 0.17 0.11
 1 -3 -2 62.41 1.78
 1 -3 -2 66.64 1.76
 1 -3 -2 70.66 1.84
 -1 3 2 69.86 1.72
 -1 3 2 69.13 1.84
 1 3 -2 71.23 1.84
 0 -3 -2 0.13 0.09
 0 -3 -2 -0.09 0.08
 0 3 2 0.1 0.1
 0 3 2 0.12 0.08
 0 3 -2 0.04 0.09
 0 3 -2 0.32 0.09
 1 -3 2 0.42 0.12
 -1 3 -2 0.39 0.11
 -1 3 -2 0.34 0.12
 1 3 2 0.48 0.12
 2 -3 2 2.18 0.2
 2 -3 2 2.06 0.21
 2 -3 2 2.01 0.19
 2 -3 2 2.15 0.22
 -2 3 -2 2.56 0.23
 -2 3 -2 2.25 0.2
 2 3 2 2.39 0.19
 3 -3 2 6.05 0.37
 3 -3 2 5.74 0.37
 3 -3 2 6.09 0.33
 3 -3 2 6.12 0.33
 -3 3 -2 6.65 0.36
 -3 3 -2 6.69 0.36
 4 -3 2 26.95 0.98
 4 -3 2 27.77 0.92
 4 -3 2 27.39 0.87
 4 -3 2 26.31 0.94
 4 -3 2 27.23 0.97
 4 -3 2 26.9 0.84
 -4 3 -2 28.47 0.94
 -4 3 -2 29.68 0.96
 5 -3 2 3.75 0.33
 5 -3 2 4.14 0.36
 5 -3 2 3.51 0.3
 5 -3 2 3.76 0.31
 5 -3 2 3.78 0.31
 5 -3 2 3.73 0.35
 5 -3 2 3.39 0.23
 -5 3 -2 4.1 0.35
 6 -3 2 0.53 0.14
 6 -3 2 1.07 0.21
 6 -3 2 0.63 0.21
 6 -3 2 0.7 0.19
 6 -3 2 0.56 0.21
 6 -3 2 0.73 0.24
 6 -3 2 0.72 0.2
 -6 3 -2 0.71 0.21
 7 -3 2 3.13 0.39
 -7 -3 -2 2.2 0.33
 -7 -3 -2 2.03 0.32
 -7 -3 -2 2.17 0.27
 7 -3 2 2.19 0.34
 -7 -3 -2 2.23 0.39
 -7 -3 -2 1.93 0.28
 7 -3 2 2.29 0.3
 -7 -3 -2 1.39 0.26
 7 -3 2 2.53 0.44
 7 -3 2 2.38 0.23
 -7 3 -2 2.47 0.34
 -7 3 -2 2.24 0.32
 -7 3 -2 2.53 0.27
 -7 3 -2 2.62 0.39
 8 -3 2 -0.08 0.19
 8 -3 2 -0.05 0.18
 -8 -3 -2 0.15 0.15
 -8 -3 -2 -0.07 0.13
 8 -3 2 0.11 0.13
 -8 -3 -2 0.05 0.11
 -8 -3 -2 -0.16 0.15
 8 -3 2 -0.1 0.18
 -8 -3 -2 -0.03 0.16
 8 -3 2 0.11 0.23
 -8 -3 -2 0 0.18
 -8 3 -2 0.14 0.17
 -8 3 -2 0.02 0.15
 -8 3 -2 0.29 0.19
 -9 -3 -2 0.07 0.16
 -9 -3 -2 0.08 0.18
 -9 -3 -2 -0.13 0.1
 9 -3 2 -0.02 0.18
 9 -3 2 0.11 0.21
 9 -3 2 0.34 0.14
 -9 -3 -2 -0.09 0.12
 -9 -3 -2 -0.01 0.13
 9 -3 2 -0.08 0.19
 -9 3 -2 -0.09 0.13
 -9 3 -2 -0.17 0.18
 -9 3 -2 0 0.17
 -9 3 -2 0.05 0.19
 10 -3 2 1.91 0.32
 10 -3 2 1.12 0.27
 10 -3 2 1.63 0.37
 -10 -3 -2 1.87 0.28
 -10 -3 -2 1.67 0.34
 10 -3 2 2.12 0.43
 -10 -3 -2 2.4 0.33
 10 -3 2 1.66 0.23
 -10 -3 -2 1.96 0.26
 -10 3 -2 1.99 0.3
 -10 3 -2 2.1 0.26
 -10 3 -2 2.07 0.31
 -10 3 -2 2.56 0.34
 -11 -3 -2 2.56 0.28
 11 -3 2 2.37 0.31
 -11 -3 -2 2.36 0.32
 -11 -3 -2 2.19 0.22
 11 -3 2 2.12 0.33
 -11 -3 -2 2.39 0.26
 11 -3 2 2.18 0.24
 11 3 2 2.39 0.38
 11 3 2 2.36 0.3
 -11 3 -2 2.18 0.27
 -11 3 -2 2.48 0.26
 -10 -4 2 6.83 0.44
 -10 -4 2 6.85 0.34
 -10 -4 2 6.52 0.41
 10 -4 -2 6.57 0.45
 10 -4 -2 6.52 0.57
 10 -4 -2 5.99 0.32
 -10 -4 2 5.61 0.47
 -10 4 2 6.44 0.44
 -10 4 2 6.7 0.4
 -10 4 2 5.93 0.41
 -10 4 2 6.24 0.42
 -10 4 2 6.57 0.55
 -10 4 2 6.3 0.39
 -10 4 2 6.53 0.27
 9 -4 -2 1.96 0.46
 -9 -4 2 1.78 0.29
 -9 -4 2 2.32 0.33
 9 -4 -2 2.23 0.38
 -9 -4 2 2.42 0.36
 9 -4 -2 1.88 0.24
 -9 -4 2 2.26 0.25
 9 -4 -2 2 0.35
 -9 4 2 2 0.3
 -9 4 2 2.27 0.34
 -9 4 2 1.78 0.3
 -9 4 2 2.31 0.3
 -9 4 2 1.97 0.43
 -9 4 2 2.65 0.28
 8 -4 -2 6.56 0.45
 8 -4 -2 5.04 0.33
 8 -4 -2 4.92 0.63
 -8 -4 2 5.11 0.5
 -8 -4 2 4.51 0.42
 -8 -4 2 5.07 0.43
 8 -4 -2 4.67 0.5
 -8 -4 2 5.33 0.36
 8 -4 -2 6.17 0.54
 -8 4 2 5.39 0.43
 -8 4 2 6.01 0.46
 -8 4 2 5.99 0.61
 -8 4 2 5.54 0.39
 -8 4 2 4.92 0.47
 -8 4 2 5.88 0.43
 -8 4 2 5.16 0.48
 7 -4 -2 11.24 0.68
 7 -4 -2 10.26 0.64
 7 -4 -2 10.22 0.56
 -7 -4 2 10.78 0.61
 7 -4 -2 11.05 0.46
 7 -4 -2 10.3 0.58
 7 -4 -2 10.06 0.56
 -7 -4 2 10.94 0.72
 7 -4 -2 9.89 0.61
 7 -4 -2 11.21 0.7
 -7 -4 2 10.12 0.4
 -7 -4 2 10.81 0.59
 -7 -4 2 10.52 0.49
 -7 4 2 11.38 0.61
 -7 4 2 10 0.58
 -7 4 2 11.67 0.63
 -7 4 2 11.06 0.56
 -7 4 2 10.74 0.64
 -7 4 2 10.43 0.58
 -7 4 2 11.35 0.65
 6 -4 -2 0.83 0.24
 6 -4 -2 1.43 0.25
 -6 -4 2 1.03 0.26
 -6 -4 2 1.42 0.19
 -6 -4 2 1.03 0.24
 6 -4 -2 1.45 0.25
 6 -4 -2 1.04 0.25
 6 -4 -2 1.05 0.26
 6 -4 -2 1.29 0.26
 -6 -4 2 1.41 0.28
 6 -4 -2 1.22 0.28
 6 -4 -2 1.18 0.18
 6 -4 -2 1.24 0.28
 -6 4 2 1.58 0.29
 -6 4 2 1.24 0.24
 -6 4 2 1.17 0.19
 -6 4 2 1.92 0.33
 -6 4 2 1.26 0.26
 -6 4 2 1.3 0.28
 5 -4 -2 21.15 0.8
 5 -4 -2 20.36 0.78
 5 -4 -2 20.87 0.78
 5 -4 -2 20.42 0.9
 5 -4 -2 20.63 0.88
 5 -4 -2 20.21 0.88
 5 -4 -2 20.72 0.64
 5 -4 -2 20.15 0.87
 5 -4 -2 20.96 0.83
 -5 4 2 21.21 0.88
 -5 4 2 21.88 0.85
 4 -4 -2 0.12 0.14
 4 -4 -2 0.12 0.15
 4 -4 -2 0.12 0.13
 4 -4 -2 0.18 0.1
 4 -4 -2 0.03 0.11
 4 -4 -2 0.38 0.16
 -4 4 2 -0.25 0.11
 -4 4 2 0.27 0.14
 3 -4 -2 86.32 2.32
 3 -4 -2 84.78 2.15
 3 -4 -2 85.14 2.4
 3 -4 -2 85.27 2.09
 3 -4 -2 85.31 1.89
 3 -4 -2 83.21 2.42
 -3 4 2 92 2.46
 3 4 -2 89.58 2.38
 -3 4 2 90 2.32
 2 -4 -2 11.84 0.51
 2 -4 -2 12.47 0.56
 2 -4 -2 12.54 0.52
 2 -4 -2 12.13 0.51
 2 -4 -2 11.62 0.54
 -2 4 2 12.65 0.52
 2 4 -2 12.31 0.54
 -2 4 2 12.75 0.57
 1 -4 -2 76.18 1.94
 1 -4 -2 80.21 2.15
 1 -4 -2 78.74 1.9
 -1 -4 2 79.38 1.93
 -1 4 2 84.76 2.12
 -1 4 2 84.49 2.29
 1 4 -2 87.81 2.28
 0 -4 2 3.91 0.27
 0 -4 -2 4.39 0.28
 0 4 -2 4.88 0.33
 0 4 2 4.69 0.26
 0 4 2 5.9 0.35
 0 4 -2 4.89 0.28
 1 -4 2 38.93 1.14
 1 -4 2 41.31 1.12
 1 -4 2 41.62 1.26
 1 4 2 44.68 1.33
 -1 4 -2 46.89 1.27
 -1 4 -2 45.26 1.37
 2 -4 2 12.69 0.57
 2 -4 2 11.36 0.5
 2 -4 2 10.8 0.51
 2 -4 2 11.34 0.49
 -2 4 -2 12.12 0.53
 -2 4 -2 13.06 0.59
 2 4 2 12.22 0.52
 3 -4 2 0.19 0.15
 3 -4 2 0.01 0.11
 3 -4 2 0.08 0.11
 3 -4 2 0.07 0.11
 -3 4 -2 0.21 0.15
 -3 4 -2 0.17 0.13
 4 -4 2 16.66 0.77
 4 -4 2 16.63 0.65
 4 -4 2 15.6 0.72
 4 -4 2 15.04 0.51
 4 -4 2 16.79 0.67
 -4 4 -2 19.19 0.77
 -4 4 -2 18.17 0.77
 5 -4 2 8.11 0.54
 5 -4 2 7.37 0.45
 5 -4 2 7.27 0.5
 5 -4 2 7.8 0.46
 5 -4 2 7.04 0.34
 5 -4 2 7.25 0.43
 5 -4 2 7.22 0.51
 -5 4 -2 8.69 0.52
 -6 -4 -2 21.11 0.74
 6 -4 2 21.22 0.93
 6 -4 2 21.17 0.93
 6 -4 2 20.96 0.97
 -6 -4 -2 21.31 1.13
 6 -4 2 19.8 0.81
 6 -4 2 21.69 1.17
 6 -4 2 21.38 0.83
 6 -4 2 21.19 0.84
 6 -4 2 19.86 0.66
 -6 -4 -2 20.95 0.82
 -6 4 -2 24.21 0.94
 -6 4 -2 20.58 0.67
 -6 4 -2 21.28 0.88
 -6 4 -2 21.68 0.8
 7 -4 2 7.42 0.69
 7 -4 2 7.32 0.55
 -7 -4 -2 7.7 0.52
 -7 -4 -2 7.82 0.51
 7 -4 2 7.26 0.38
 -7 -4 -2 7.24 0.41
 7 -4 2 8.15 0.54
 7 -4 2 6.41 0.48
 -7 -4 -2 7.1 0.46
 -7 -4 -2 7.13 0.62
 7 -4 2 8.13 0.61
 7 -4 2 7.56 0.57
 -7 4 -2 7.47 0.53
 -7 4 -2 7.26 0.41
 -7 4 -2 7.24 0.52
 -7 4 -2 8.25 0.55
 -7 4 -2 7.58 0.62
 8 -4 2 0.11 0.2
 8 -4 2 -0.17 0.12
 -8 -4 -2 0.12 0.14
 -8 -4 -2 0.23 0.19
 8 -4 2 0.27 0.22
 -8 -4 -2 0.04 0.14
 8 -4 2 0.1 0.17
 8 -4 2 0.33 0.26
 -8 -4 -2 0.08 0.13
 -8 -4 -2 -0.12 0.15
 -8 4 -2 0.15 0.18
 -8 4 -2 0.08 0.18
 -8 4 -2 0.34 0.22
 -9 -4 -2 4.2 0.25
 -9 -4 -2 3.97 0.47
 9 -4 2 4.3 0.49
 -9 -4 -2 3.72 0.37
 9 -4 2 3.94 0.46
 9 -4 2 3.66 0.29
 -9 -4 -2 4.43 0.39
 9 -4 2 4.3 0.39
 -9 -4 -2 4.11 0.34
 -9 4 -2 3.63 0.41
 -9 4 -2 4.38 0.37
 -10 -4 -2 -0.01 0.11
 10 -4 2 0.12 0.16
 10 -4 2 0.05 0.13
 -10 -4 -2 0.11 0.12
 -10 -4 -2 0.2 0.14
 -10 -4 -2 0.24 0.15
 10 -4 2 0.12 0.16
 10 4 2 0.07 0.16
 -10 4 -2 0.11 0.16
 10 4 2 0.06 0.17
 -10 4 -2 0.01 0.11
 -10 -5 2 8.13 0.34
 10 -5 -2 8.92 0.55
 -10 -5 2 8.91 0.54
 -10 -5 2 8.9 0.43
 10 -5 -2 8.45 0.41
 -10 -5 2 8.82 0.41
 10 -5 -2 8.57 0.48
 -10 5 2 8.41 0.42
 -10 5 2 8.5 0.39
 -10 5 2 8.54 0.44
 -10 5 2 8.35 0.41
 -9 -5 2 2.71 0.31
 -9 -5 2 2.51 0.24
 9 -5 -2 2.85 0.31
 9 -5 -2 2.71 0.41
 9 -5 -2 2.84 0.4
 -9 -5 2 2.51 0.35
 -9 -5 2 2.84 0.34
 9 -5 -2 2.46 0.24
 -9 5 2 2.17 0.31
 -9 5 2 2.93 0.33
 -9 5 2 2.93 0.32
 -9 5 2 2.55 0.34
 -9 5 2 2.72 0.27
 8 -5 -2 11 0.6
 8 -5 -2 10.6 0.46
 8 -5 -2 11 0.8
 -8 -5 2 10.78 0.72
 -8 -5 2 12.8 0.61
 -8 -5 2 10.2 0.49
 8 -5 -2 11.4 0.67
 -8 -5 2 10.91 0.6
 8 -5 -2 10.3 0.66
 -8 5 2 10.87 0.57
 -8 5 2 10.71 0.62
 -8 5 2 10.23 0.56
 -8 5 2 11.48 0.55
 -7 -5 2 0.27 0.19
 7 -5 -2 0.19 0.24
 7 -5 -2 0.34 0.15
 7 -5 -2 0.58 0.21
 7 -5 -2 0.47 0.19
 7 -5 -2 0.34 0.22
 7 -5 -2 0.6 0.25
 -7 -5 2 0.05 0.22
 -7 -5 2 0.68 0.23
 -7 -5 2 0.53 0.12
 -7 -5 2 0.42 0.16
 7 -5 -2 0.52 0.23
 7 -5 -2 0.63 0.2
 -7 -5 2 0.39 0.17
 -7 5 2 0.22 0.22
 -7 5 2 0.71 0.2
 -7 5 2 0.24 0.19
 -7 5 2 0.4 0.19
 -7 5 2 0.57 0.21
 -7 5 2 0.67 0.24
 -6 -5 2 9.11 0.47
 6 -5 -2 8.36 0.73
 -6 -5 2 9.4 1.48
 -6 -5 2 9.18 0.54
 6 -5 -2 8.74 0.51
 -6 -5 2 8.53 0.54
 6 -5 -2 9.56 0.61
 6 -5 -2 8.51 0.55
 6 -5 -2 8.78 0.63
 6 -5 -2 9.11 0.61
 -6 -5 2 8.79 0.65
 -6 -5 2 8.83 0.41
 6 -5 -2 9.49 0.42
 6 -5 -2 9.17 0.56
 -6 5 2 10.33 0.61
 -6 5 2 9.14 0.56
 -6 5 2 8.97 0.53
 -6 5 2 9.07 0.44
 -6 5 2 9.99 0.58
 -6 5 2 8.77 0.6
 -6 5 2 9.44 0.62
 5 -5 -2 11.87 0.58
 5 -5 -2 14.09 0.72
 5 -5 -2 12.94 0.49
 -5 -5 2 12.57 0.52
 5 -5 -2 13.21 0.74
 -5 -5 2 11.97 0.77
 5 -5 -2 12.18 0.69
 5 -5 -2 13.48 0.66
 -5 -5 2 11.71 0.62
 -5 -5 2 13.29 0.57
 5 -5 -2 12.2 0.63
 -5 -5 2 11.85 0.63
 5 -5 -2 13.25 0.92
 -5 5 2 12.31 0.69
 -5 5 2 12.63 0.64
 -5 5 2 12.34 0.42
 -5 5 2 12.18 0.66
 -5 5 2 13.62 0.66
 -5 5 2 14.02 0.69
 -5 5 2 13.81 0.6
 4 -5 -2 10.57 0.42
 4 -5 -2 9.74 0.5
 4 -5 -2 10.48 0.61
 4 -5 -2 10.17 0.55
 4 -5 -2 10.56 0.55
 4 -5 -2 10.67 0.6
 4 -5 -2 11.05 0.63
 -4 5 2 10.77 0.57
 -4 5 2 11.25 0.64
 -4 5 2 11.36 0.65
 3 -5 -2 63.26 1.78
 3 -5 -2 63.51 1.92
 3 -5 -2 67.36 1.99
 3 -5 -2 67.59 1.88
 3 -5 -2 64.28 1.5
 3 -5 -2 63.96 1.82
 3 -5 -2 61.75 1.72
 -3 5 2 67.31 2.05
 -3 5 2 71.34 1.94
 2 -5 -2 10.19 0.37
 2 -5 -2 10.98 0.53
 2 -5 -2 10.62 0.56
 2 -5 -2 10.7 0.51
 2 -5 -2 10.47 0.59
 -2 5 2 11.42 0.61
 -2 5 2 12.07 0.55
 2 5 -2 12.09 0.6
 1 -5 -2 7.67 0.42
 1 -5 -2 8.2 0.44
 -1 -5 2 8.37 0.43
 -1 5 2 8.17 0.49
 -1 5 2 7.77 0.41
 1 5 -2 8.71 0.5
 0 -5 2 224.27 5.09
 0 -5 -2 223.95 5.07
 0 -5 -2 224.89 4.92
 0 -5 2 220.6 4.93
 0 5 -2 229.08 5.35
 0 5 2 234.57 5.74
 0 5 -2 232.49 5.75
 1 -5 2 21 0.77
 1 -5 2 20.73 0.75
 -1 5 -2 23.75 0.83
 1 5 2 23.54 0.89
 -1 5 -2 23.62 0.93
 2 -5 2 120.39 2.98
 2 -5 2 125.69 3.24
 2 -5 2 114.16 2.87
 2 -5 2 125.85 3.34
 -2 5 -2 134.44 3.24
 -2 5 -2 129.25 3.44
 2 5 2 125.14 3.35
 3 -5 2 0.23 0.15
 3 -5 2 0.16 0.13
 3 -5 2 0.17 0.16
 3 -5 2 0.33 0.16
 3 -5 2 0.37 0.18
 -3 5 -2 0.21 0.15
 -3 5 -2 0.36 0.2
 4 -5 2 5.54 0.46
 4 -5 2 5.88 0.47
 4 -5 2 5.34 0.36
 4 -5 2 5.52 0.46
 4 -5 2 6.36 0.43
 4 -5 2 5.42 0.41
 -4 5 -2 5.96 0.48
 -4 5 -2 5.99 0.45
 -4 5 -2 6.04 0.44
 5 -5 2 17.06 0.98
 -5 -5 -2 16.57 0.76
 5 -5 2 18.25 0.8
 5 -5 2 17.27 0.58
 5 -5 2 18.11 0.85
 -5 -5 -2 17.04 0.75
 5 -5 2 18.01 0.76
 5 -5 2 17.8 0.85
 -5 -5 -2 21.41 1.79
 5 -5 2 16.64 0.74
 -5 -5 -2 16.69 0.69
 5 -5 2 17.3 0.9
 -5 -5 -2 18.4 1.01
 -5 5 -2 18.11 0.68
 -5 5 -2 17.99 0.78
 -5 5 -2 18.65 0.83
 -5 5 -2 18.48 0.83
 -6 -5 -2 76.14 1.89
 6 -5 2 74.31 2.19
 -6 -5 -2 76.04 2.03
 -6 -5 -2 78.17 2.91
 6 -5 2 78.56 2.08
 6 -5 2 72.83 2.39
 6 -5 2 74.72 2.87
 6 -5 2 76.39 2.28
 6 -5 2 76.52 1.78
 -6 -5 -2 73.81 1.99
 -6 -5 -2 74.55 2.01
 -6 -5 -2 72.83 4.81
 6 -5 2 77.38 2.3
 6 -5 2 78.87 2.14
 -6 5 -2 75.91 2.22
 -6 5 -2 76.73 1.98
 -6 5 -2 79.45 2.14
 -6 5 -2 73.41 1.72
 -7 -5 -2 6.27 0.47
 7 -5 2 6.18 0.58
 7 -5 2 5.55 0.55
 -7 -5 -2 6.11 0.46
 7 -5 2 5.78 0.35
 7 -5 2 5.61 0.47
 -7 -5 -2 4.98 0.41
 7 -5 2 6.11 0.53
 7 -5 2 6.23 0.47
 -7 -5 -2 5.44 0.38
 -7 -5 -2 6.22 0.6
 -7 -5 -2 4.96 1.18
 7 -5 2 5.88 0.52
 7 -5 2 5.34 0.42
 -7 5 -2 6.05 0.51
 -7 5 -2 5.93 0.49
 -7 5 -2 5.77 0.37
 -7 5 -2 5.98 0.5
 -8 -5 -2 2 0.28
 -8 -5 -2 1.78 0.23
 8 -5 2 2.35 0.41
 8 -5 2 2.09 0.3
 -8 -5 -2 2.38 0.41
 -8 -5 -2 1.71 0.28
 -8 -5 -2 2.47 0.32
 8 -5 2 1.75 0.34
 -8 5 -2 2.3 0.34
 -8 5 -2 2.25 0.34
 -9 -5 -2 -0.09 0.14
 9 -5 2 0.04 0.17
 -9 -5 -2 -0.05 0.15
 -9 -5 -2 0.11 0.13
 -9 -5 -2 0.2 0.14
 9 -5 2 -0.03 0.13
 9 -5 2 0 0.12
 9 5 2 -0.03 0.17
 -9 5 -2 0.15 0.17
 9 5 2 0.1 0.17
 -9 5 -2 0.01 0.15
 -10 -5 -2 0.8 0.14
 -10 -5 -2 0.79 0.16
 -10 -5 -2 0.64 0.16
 -10 -5 -2 0.78 0.16
 10 -5 2 0.58 0.13
 10 -5 2 0.67 0.18
 10 -5 2 0.93 0.16
 10 5 2 0.72 0.19
 -10 5 -2 0.6 0.12
 -10 5 -2 0.79 0.17
 10 5 2 0.72 0.17
 9 -6 -2 10.29 0.44
 -9 -6 2 10.63 0.62
 9 -6 -2 10.56 0.58
 -9 -6 2 11.3 0.49
 -9 -6 2 10.92 0.42
 -9 -6 2 10.68 0.47
 -9 6 2 10.53 0.5
 -9 6 2 10.2 0.39
 -9 6 2 10.75 0.44
 -8 -6 2 2.37 0.35
 8 -6 -2 1.9 0.34
 8 -6 -2 2.02 0.27
 -8 -6 2 2.22 0.3
 -8 -6 2 1.96 0.25
 8 -6 -2 2.51 0.36
 8 -6 -2 1.83 0.33
 -8 -6 2 2.36 0.32
 -8 6 2 1.34 0.21
 -8 6 2 1.93 0.28
 -8 6 2 2.16 0.32
 7 -6 -2 28.9 1.07
 -7 -6 2 29.49 1.02
 7 -6 -2 31.92 1.2
 7 -6 -2 28.3 1.04
 7 -6 -2 30.69 1.39
 -7 -6 2 30.07 2.51
 -7 -6 2 30.01 0.95
 -7 -6 2 29.47 1.38
 7 -6 -2 28.94 1.15
 -7 -6 2 30.58 1.01
 -7 -6 2 30.27 0.71
 7 -6 -2 30.11 1.05
 -7 6 2 31.3 1.1
 -7 6 2 29.45 1.01
 -7 6 2 30.79 1.01
 -7 6 2 28.91 0.99
 6 -6 -2 1.46 0.34
 6 -6 -2 2.82 0.36
 6 -6 -2 1.3 0.3
 -6 -6 2 2.08 0.38
 -6 -6 2 2.01 0.27
 6 -6 -2 1.81 0.36
 6 -6 -2 2.12 0.36
 -6 -6 2 1.98 0.23
 6 -6 -2 2.36 0.33
 -6 -6 2 2.36 0.3
 6 -6 -2 1.87 0.28
 -6 -6 2 2.59 0.33
 -6 6 2 2.14 0.34
 -6 6 2 2.3 0.33
 -6 6 2 2.21 0.33
 -6 6 2 1.79 0.3
 -6 6 2 2.1 0.35
 -6 6 2 1.72 0.26
 -5 -6 2 7.26 0.49
 -5 -6 2 4.84 1.3
 5 -6 -2 7.6 0.56
 5 -6 -2 7.57 0.45
 -5 -6 2 6.99 0.39
 5 -6 -2 7.07 0.5
 5 -6 -2 6.48 0.47
 -5 -6 2 7 0.48
 5 -6 -2 7.55 0.56
 5 -6 -2 6.62 0.6
 -5 -6 2 6.81 0.6
 -5 -6 2 7.14 0.45
 5 -6 -2 6.88 0.59
 -5 6 2 7.29 0.53
 -5 6 2 6.68 0.45
 -5 6 2 8.14 0.54
 -5 6 2 7.25 0.51
 -5 6 2 7.28 0.54
 -4 -6 2 20.99 2.11
 4 -6 -2 20.25 0.85
 4 -6 -2 19.21 0.92
 4 -6 -2 19.56 0.83
 -4 -6 2 20.25 0.79
 -4 -6 2 18.92 1.05
 -4 -6 2 20.72 0.82
 4 -6 -2 19.15 0.89
 -4 -6 2 19.58 0.79
 -4 -6 2 19.57 0.71
 4 -6 -2 19.67 0.75
 4 -6 -2 18.05 0.91
 4 -6 -2 18.98 1.03
 -4 6 2 18.38 0.93
 -4 6 2 20.32 0.84
 -4 6 2 20.63 0.68
 -4 6 2 21.68 0.86
 -4 6 2 19.39 0.85
 -4 6 2 19.94 0.88
 -4 6 2 20.74 0.81
 3 -6 -2 0.75 0.25
 -3 -6 2 0.83 0.24
 -3 -6 2 1.1 0.26
 -3 -6 2 1.11 0.27
 3 -6 -2 0.88 0.22
 -3 -6 2 1.29 0.24
 3 -6 -2 1.45 0.28
 -3 -6 2 1.22 0.14
 -3 -6 2 1.9 0.37
 3 -6 -2 0.82 0.26
 3 -6 -2 1.15 0.25
 -3 6 2 1.09 0.28
 -3 6 2 1.36 0.27
 -3 6 2 0.93 0.23
 -3 6 2 1.32 0.3
 -3 6 2 0.64 0.22
 -3 6 2 1.24 0.25
 -3 6 2 1.29 0.3
 2 -6 -2 19.49 0.78
 2 -6 -2 18.91 0.87
 -2 -6 2 18.79 0.62
 2 -6 -2 17.67 0.92
 2 -6 -2 20.35 0.82
 -2 6 2 19.77 0.9
 -2 6 2 20.13 0.81
 2 6 -2 18.66 0.86
 -2 6 2 18.73 0.83
 1 -6 -2 66.5 2.01
 1 -6 -2 68.45 1.81
 1 -6 -2 65.83 1.86
 1 6 -2 68.24 2.07
 -1 6 2 67.96 1.87
 -1 6 2 67.35 2.07
 0 -6 2 0.41 0.17
 0 -6 -2 0.11 0.13
 0 -6 2 0.18 0.15
 0 -6 2 0.32 0.21
 0 6 -2 0.02 0.17
 0 6 2 0.01 0.12
 0 6 -2 0.01 0.17
 0 6 2 0.28 0.2
 1 -6 2 100.41 2.59
 1 -6 2 98.3 2.78
 1 -6 2 102 2.52
 -1 6 -2 105.44 2.92
 1 6 2 101.92 2.85
 -1 6 -2 100.81 2.58
 -1 6 -2 100.67 2.65
 2 -6 2 7.2 0.48
 2 -6 2 5.92 0.49
 2 -6 2 8.16 0.51
 -2 6 -2 7.03 0.49
 -2 6 -2 7.16 0.55
 2 6 2 6.65 0.48
 2 6 2 7.06 0.72
 -2 6 -2 7.29 0.59
 -2 6 -2 7.36 0.49
 3 -6 2 60.11 1.97
 3 -6 2 60.55 1.64
 -3 -6 -2 60.98 1.7
 -3 -6 -2 60.9 1.68
 3 -6 2 63.4 1.8
 -3 -6 -2 58.78 1.65
 3 -6 2 59.18 1.92
 3 -6 2 62.77 1.74
 -3 6 -2 62.15 2.03
 -3 6 -2 61.86 2.32
 -3 6 -2 62.65 1.71
 3 6 2 63.37 1.97
 -3 6 -2 66.43 1.83
 3 6 2 65.76 2.58
 -3 6 -2 62 1.77
 -3 6 -2 66.36 1.9
 -4 -6 -2 17.05 1.89
 -4 -6 -2 17.52 0.73
 -4 -6 -2 18.77 0.79
 4 -6 2 18.39 0.77
 4 -6 2 17.43 0.7
 4 -6 2 17.84 0.81
 4 -6 2 17.25 0.88
 4 -6 2 18.26 0.91
 4 -6 2 17.73 0.78
 4 -6 2 18.52 0.91
 4 -6 2 17.16 0.84
 -4 -6 -2 17.03 0.75
 -4 -6 -2 20.77 1.07
 -4 6 -2 19.2 0.73
 -4 6 -2 17.95 0.9
 4 6 2 19.4 1.14
 4 6 2 17.18 0.87
 -4 6 -2 18.85 0.83
 -4 6 -2 19.29 0.85
 -4 6 -2 18.52 0.81
 -5 -6 -2 68.96 1.9
 5 -6 2 70.67 2.02
 -5 -6 -2 66.67 1.87
 5 -6 2 69.35 1.97
 -5 -6 -2 69.47 1.9
 5 -6 2 72.43 1.97
 5 -6 2 69.31 2.59
 5 -6 2 69.93 2.26
 5 -6 2 72.68 2.19
 -5 -6 -2 72.29 1.82
 -5 -6 -2 66.7 4.56
 -5 -6 -2 70.3 2.74
 5 -6 2 69.8 1.9
 5 -6 2 71.89 2.14
 -5 6 -2 74.03 2.06
 -5 6 -2 70.23 1.77
 -5 6 -2 72.94 1.96
 5 6 2 70.27 2.89
 5 6 2 73.25 2.24
 -5 6 -2 73.57 2.15
 6 -6 2 0.76 0.26
 6 -6 2 0.86 0.28
 6 -6 2 0.54 0.21
 -6 -6 -2 0.61 0.18
 -6 -6 -2 0.99 0.22
 6 -6 2 0.69 0.26
 -6 -6 -2 0.73 0.21
 -6 -6 -2 1.27 0.26
 6 -6 2 0.37 0.25
 -6 -6 -2 0.71 0.22
 6 -6 2 0.75 0.23
 6 -6 2 0.8 0.19
 6 -6 2 0.86 0.25
 -6 6 -2 0.89 0.25
 6 6 2 0.54 0.27
 6 6 2 0.74 0.25
 -6 6 -2 1.06 0.23
 -6 6 -2 0.78 0.27
 7 -6 2 1.25 0.3
 -7 -6 -2 1.64 0.24
 -7 -6 -2 1.14 0.23
 7 -6 2 1.49 0.32
 -7 -6 -2 1.01 0.25
 7 -6 2 1.06 0.19
 7 -6 2 1.46 0.32
 7 -6 2 1.46 0.27
 -7 -6 -2 1.36 0.25
 7 -6 2 1.69 0.31
 -7 -6 -2 1.54 0.26
 7 -6 2 0.97 0.28
 7 6 2 2.08 0.36
 -7 6 -2 1.41 0.22
 7 6 2 1.05 0.31
 -7 6 -2 1.09 0.27
 -8 -6 -2 10.29 0.5
 -8 -6 -2 9.82 0.52
 -8 -6 -2 9.26 1.21
 -8 -6 -2 9.95 0.69
 8 -6 2 9.95 0.44
 -8 -6 -2 10.47 0.52
 -8 -6 -2 9.78 0.34
 8 -6 2 10.24 0.53
 8 -6 2 10.11 0.56
 8 -6 2 10.14 0.6
 8 6 2 9.26 0.7
 -8 6 -2 9.05 0.51
 -8 6 -2 9.89 0.54
 8 6 2 9.8 0.57
 -9 -6 -2 -0.05 0.11
 -9 -6 -2 0.08 0.14
 9 -6 2 0.16 0.15
 -9 -6 -2 0.09 0.11
 -9 -6 -2 0.09 0.11
 9 6 2 -0.01 0.13
 -9 6 -2 0.11 0.12
 -9 6 -2 -0.13 0.12
 9 6 2 0.02 0.11
 -8 -7 2 4.33 0.4
 -8 -7 2 4.4 0.31
 -8 -7 2 3.58 0.73
 -8 -7 2 4.81 0.28
 8 -7 -2 5 0.32
 -8 7 2 4.38 0.33
 -8 7 2 4.99 0.3
 8 7 -2 4.7 0.42
 8 7 -2 4.28 0.31
 8 7 -2 4.58 0.35
 -7 -7 2 6.43 0.53
 7 -7 -2 5.52 0.39
 7 -7 -2 5.7 0.31
 -7 -7 2 5.7 0.35
 -7 -7 2 5.93 0.42
 -7 -7 2 4.93 0.98
 7 -7 -2 5.61 0.41
 7 -7 -2 5.42 0.46
 -7 7 2 6.5 0.47
 7 7 -2 5.41 0.56
 7 7 -2 5.94 0.4
 -7 7 2 5.64 0.37
 -7 7 2 5.2 0.39
 7 7 -2 5.82 0.43
 -7 7 2 5.56 0.43
 -6 -7 2 7.54 0.49
 -6 -7 2 8.6 0.47
 6 -7 -2 6.17 0.56
 6 -7 -2 7.85 0.5
 -6 -7 2 7.02 1.24
 6 -7 -2 7.54 0.55
 6 -7 -2 8.74 0.54
 6 -7 -2 8 0.52
 6 -7 -2 9.1 0.43
 6 -7 -2 8.93 0.59
 -6 -7 2 8.88 0.35
 -6 -7 2 8.71 0.66
 6 7 -2 8.16 0.73
 6 7 -2 7.92 0.55
 -6 7 2 9.39 0.55
 6 7 -2 8.72 0.5
 -6 7 2 8.68 0.33
 -6 7 2 9.28 0.5
 -6 7 2 8.59 0.53
 5 -7 -2 -0.08 0.14
 -5 -7 2 0.12 0.07
 5 -7 -2 0 0.18
 5 -7 -2 0.09 0.13
 -5 -7 2 0.02 0.15
 -5 -7 2 0.08 0.11
 5 -7 -2 -0.14 0.16
 -5 -7 2 -0.02 0.15
 -5 -7 2 -0.19 0.15
 5 -7 -2 0.14 0.18
 -5 -7 2 -0.04 0.12
 5 -7 -2 -0.13 0.17
 -5 7 2 -0.04 0.17
 5 7 -2 0.2 0.2
 5 7 -2 0.12 0.18
 -5 7 2 0.06 0.16
 -5 7 2 -0.13 0.18
 5 7 -2 0.17 0.22
 -4 -7 2 0.35 0.2
 -4 -7 2 0.54 0.21
 4 -7 -2 0.33 0.17
 4 -7 -2 0.57 0.22
 4 -7 -2 0.57 0.21
 4 -7 -2 0.43 0.15
 -4 -7 2 0.32 0.19
 4 -7 -2 0.49 0.21
 4 -7 -2 0.29 0.21
 -4 -7 2 0.32 0.16
 -4 -7 2 0.04 0.23
 -4 -7 2 0.57 0.1
 -4 -7 2 0.63 0.19
 4 7 -2 0.5 0.22
 -4 7 2 0.52 0.21
 4 7 -2 0.47 0.22
 -4 7 2 0.59 0.21
 -4 7 2 0.51 0.15
 -4 7 2 0.48 0.22
 -4 7 2 0.34 0.2
 4 7 -2 0.26 0.24
 -3 -7 2 0.16 0.18
 3 -7 -2 -0.03 0.15
 3 -7 -2 0.04 0.21
 3 -7 -2 0.27 0.2
 -3 -7 2 0.18 0.19
 3 -7 -2 0.19 0.19
 -3 -7 2 0.18 0.16
 -3 -7 2 0.26 0.17
 -3 -7 2 0.15 0.17
 3 7 -2 0.25 0.21
 -3 7 2 0.17 0.22
 -3 7 2 0.36 0.17
 -3 7 2 0.28 0.21
 -3 7 2 0.2 0.19
 3 7 -2 0.16 0.23
 -3 7 2 0.17 0.21
 -3 7 2 0.19 0.19
 3 7 -2 0.09 0.2
 -2 -7 2 23.59 0.94
 2 -7 -2 24.95 0.87
 -2 -7 2 23.1 0.9
 2 -7 -2 24.05 0.93
 -2 -7 2 24.56 0.69
 -2 -7 2 24.17 0.88
 2 -7 -2 23.38 0.95
 2 -7 -2 28.06 1.1
 -2 7 2 26.1 1.03
 -2 7 2 26.17 0.98
 2 7 -2 26.85 1.06
 -2 7 2 27.02 0.92
 -2 7 2 24.89 0.96
 2 7 -2 26.21 1.37
 -2 7 2 25.2 1
 1 7 -2 1.01 0.24
 -1 7 2 0.93 0.19
 1 7 -2 1.01 0.26
 -1 7 2 1.04 0.27
 -1 7 2 1.13 0.27
 -1 7 2 0.98 0.27
 -1 7 2 1.41 0.28
 1 7 -2 0.71 0.25
 -1 7 2 0.87 0.21
 0 -7 2 47.01 1.5
 0 -7 2 46.78 1.57
 0 -7 -2 45.89 1.38
 0 -7 2 46.41 1.1
 0 -7 2 46.08 1.31
 0 -7 -2 46.35 1.25
 0 7 2 47.89 1.48
 0 7 -2 49.48 1.56
 0 7 2 47.66 1.44
 0 7 -2 45.64 1.47
 0 7 2 47.72 1.44
 0 7 2 46.09 1.92
 0 7 -2 47.67 2.01
 0 7 2 47.95 1.49
 0 7 2 49.97 1.47
 1 -7 2 12.14 0.71
 -1 -7 -2 10.94 0.44
 1 -7 2 11.25 0.64
 1 -7 2 11.92 0.59
 -1 -7 -2 11.2 0.56
 -1 -7 -2 11.07 0.61
 1 -7 2 10.93 0.46
 1 -7 2 11.06 0.61
 -1 7 -2 10.94 0.63
 1 7 2 11.56 0.64
 1 7 2 10.98 0.65
 -1 7 -2 12.47 0.62
 -1 7 -2 11.48 0.77
 1 7 2 11.38 0.61
 1 7 2 12.45 0.65
 1 7 2 11.22 0.78
 2 -7 2 12.72 0.65
 2 -7 2 13.38 0.69
 -2 -7 -2 13.4 0.66
 2 -7 2 13.49 0.66
 -2 -7 -2 12.41 0.56
 2 -7 2 13.58 0.75
 2 -7 2 13.53 0.56
 -2 7 -2 14.25 0.62
 2 7 2 14.9 0.7
 2 7 2 13.88 0.69
 -2 7 -2 13.97 0.8
 -2 7 -2 14.55 0.7
 -2 7 -2 13.37 0.71
 2 7 2 14.37 0.71
 2 7 2 13.34 0.89
 -3 -7 -2 6.68 1.22
 -3 -7 -2 5.48 0.44
 -3 -7 -2 5.41 0.45
 3 -7 2 5.21 0.44
 3 -7 2 5.73 0.46
 3 -7 2 5.15 0.49
 3 -7 2 5.7 0.47
 3 -7 2 5.49 0.39
 -3 -7 -2 5.22 0.32
 3 7 2 5.37 0.47
 -3 7 -2 4.67 0.45
 -3 7 -2 5.71 0.43
 -3 7 -2 5.92 0.49
 3 7 2 5.89 0.47
 3 7 2 5.89 0.49
 3 7 2 5.59 0.6
 -4 -7 -2 49.76 3.6
 4 -7 2 47.63 1.5
 4 -7 2 51.84 1.71
 4 -7 2 49.33 1.57
 -4 -7 -2 48.41 1.46
 4 -7 2 48.07 1.38
 4 -7 2 51.77 1.54
 -4 -7 -2 49.99 1.41
 4 7 2 53.5 1.7
 4 7 2 52.85 1.56
 -4 7 -2 51.18 1.41
 4 7 2 51.9 2.2
 -4 7 -2 52.39 1.57
 -4 7 -2 53.16 1.61
 -4 7 -2 51.25 1.65
 5 -7 2 5.87 0.43
 5 -7 2 6.01 0.53
 5 -7 2 6.23 0.49
 5 -7 2 6.14 0.47
 -5 -7 -2 5.55 1.15
 -5 -7 -2 6.37 0.4
 -5 -7 -2 5.58 0.47
 5 7 2 6.95 0.5
 5 7 2 6.36 0.63
 5 7 2 5.74 0.46
 -5 7 -2 6.26 0.45
 -5 7 -2 6.6 0.51
 -5 7 -2 6.47 0.35
 -6 -7 -2 3.76 0.36
 6 -7 2 3.13 0.42
 6 -7 2 3.99 0.38
 -6 -7 -2 3.56 0.38
 -6 -7 -2 3.26 0.3
 -6 -7 -2 3.92 0.94
 -6 -7 -2 3.9 0.23
 6 -7 2 3.62 0.43
 6 -7 2 3.74 0.35
 -6 7 -2 4.25 0.41
 6 7 2 4.48 0.4
 6 7 2 4.18 0.39
 6 7 2 3.79 0.52
 -6 7 -2 4.17 0.33
 -7 -7 -2 9.13 1.22
 -7 -7 -2 9.98 0.5
 7 -7 2 10.57 0.48
 -7 -7 -2 10.1 0.52
 -7 -7 -2 10.51 0.38
 7 -7 2 10.79 0.6
 7 7 2 10.31 0.54
 -7 7 -2 9.63 0.54
 7 7 2 10.43 0.7
 7 7 2 9.83 0.51
 -8 -7 -2 1.53 0.22
 -8 -7 -2 1.14 0.18
 8 -7 2 1.12 0.18
 -8 7 -2 1.16 0.19
 8 7 2 0.98 0.18
 8 7 2 1.06 0.21
 -8 7 -2 1.23 0.2
 8 7 2 0.99 0.17
 6 -8 -2 1.05 0.24
 -6 -8 2 1.79 0.34
 -6 -8 2 2.06 0.25
 6 -8 -2 1.99 0.24
 6 8 -2 2.12 0.26
 -6 8 2 1.27 0.23
 6 8 -2 2.05 0.28
 6 8 -2 2.26 0.35
 -6 8 2 1.99 0.29
 5 -8 -2 0.47 0.21
 -5 -8 2 -0.02 0.15
 5 -8 -2 0.21 0.14
 -5 -8 2 0.45 0.17
 -5 -8 2 0.18 0.11
 -5 -8 2 0.17 0.18
 -5 8 2 0.38 0.18
 -5 8 2 0.19 0.16
 5 8 -2 0.27 0.18
 -5 8 2 0.38 0.13
 5 8 -2 0.36 0.17
 5 8 -2 0.39 0.17
 4 -8 -2 1.43 0.26
 -4 -8 2 1.04 0.18
 4 -8 -2 1.22 0.2
 4 -8 -2 1.44 0.31
 -4 -8 2 1.05 0.16
 4 -8 -2 1.02 0.26
 -4 -8 2 0.84 0.2
 -4 8 2 0.96 0.26
 -4 8 2 0.93 0.22
 4 8 -2 0.84 0.21
 4 8 -2 1.37 0.27
 4 8 -2 1.01 0.22
 -4 8 2 1.09 0.21
 4 8 -2 1.01 0.25
 3 -8 -2 0.42 0.22
 -3 -8 2 -0.02 0.24
 -3 -8 2 0.12 0.16
 -3 -8 2 0.33 0.1
 -3 -8 2 0.53 0.17
 3 -8 -2 0.45 0.23
 3 -8 -2 0.58 0.2
 3 -8 -2 0.14 0.21
 3 -8 -2 0.03 0.14
 -3 -8 2 0.23 0.18
 3 8 -2 0.39 0.2
 -3 8 2 0.27 0.18
 -3 8 2 0.62 0.23
 3 8 -2 0.31 0.17
 -3 8 2 0.41 0.21
 -3 8 2 0.28 0.14
 3 8 -2 0.27 0.21
 2 -8 -2 0.83 0.25
 2 -8 -2 1.22 0.27
 2 -8 -2 1.75 0.33
 -2 -8 2 1.32 0.23
 -2 -8 2 1.56 0.22
 -2 -8 2 1.18 0.24
 -2 -8 2 2.01 0.31
 2 -8 -2 1.65 0.29
 2 -8 -2 1.91 0.25
 -2 8 2 1.76 0.33
 2 8 -2 1.59 0.38
 2 8 -2 1.13 0.23
 -2 8 2 2.24 0.28
 -2 8 2 1.56 0.26
 2 8 -2 1.84 0.32
 -2 8 2 2.49 0.38
 -1 8 2 2.85 0.34
 1 8 -2 2.74 0.44
 -1 8 2 2.41 0.34
 1 8 -2 2.88 0.35
 1 8 -2 2.96 0.39
 -1 8 2 2.77 0.38
 0 -8 2 1.29 0.21
 0 -8 -2 1.26 0.24
 0 -8 2 1.12 0.29
 0 -8 -2 1.69 0.18
 0 8 -2 1.34 0.24
 0 8 2 1.37 0.28
 0 8 2 1.29 0.28
 0 8 2 1.51 0.28
 0 8 -2 1.06 0.28
 0 8 -2 1.53 0.36
 0 8 2 1.57 0.32
 1 -8 2 21.65 0.96
 -1 -8 -2 20.72 0.73
 1 -8 2 20.57 0.84
 1 -8 2 19.84 0.9
 -1 -8 -2 19.87 0.93
 1 -8 2 21.46 0.75
 1 -8 2 21.42 1.01
 1 8 2 21.56 0.86
 1 8 2 22.27 1.06
 -1 8 -2 22.42 0.79
 1 8 2 22.86 0.89
 -1 8 -2 22.75 0.92
 1 8 2 21.09 0.84
 1 8 2 22.72 0.83
 -1 8 -2 22.21 1.03
 1 8 2 23.3 0.93
 -2 8 -2 1.12 0.27
 2 8 2 0.85 0.22
 2 8 2 1.15 0.24
 2 8 2 1.21 0.21
 2 8 2 1.21 0.28
 2 8 2 1.39 0.26
 -2 8 -2 0.86 0.22
 3 -8 2 1.31 0.28
 -3 -8 -2 0.68 0.22
 -3 -8 -2 1.13 0.24
 3 -8 2 1.44 0.28
 3 -8 2 1.36 0.18
 -3 -8 -2 0.5 0.33
 3 -8 2 1.49 0.34
 3 -8 2 1.34 0.32
 3 -8 2 1.06 0.26
 3 8 2 1.22 0.27
 -3 8 -2 1.21 0.22
 3 8 2 1.21 0.25
 -3 8 -2 1.68 0.29
 3 8 2 0.86 0.24
 3 8 2 1.74 0.29
 -3 8 -2 1.7 0.31
 3 8 2 1.56 0.29
 4 -8 2 0.06 0.19
 -4 -8 -2 0.03 0.15
 -4 -8 -2 0.16 0.16
 4 -8 2 0.06 0.18
 4 -8 2 -0.01 0.18
 4 -8 2 0.1 0.12
 -4 -8 -2 -0.18 0.14
 -4 -8 -2 -0.1 0.14
 4 8 2 0.09 0.17
 -4 8 -2 0.18 0.13
 4 8 2 0.17 0.17
 4 8 2 0.13 0.18
 -4 8 -2 0.28 0.22
 4 8 2 0.05 0.18
 4 8 2 -0.12 0.12
 -4 8 -2 0.13 0.19
 5 -8 2 3.09 0.35
 -5 -8 -2 3.39 0.22
 -5 -8 -2 2.32 0.76
 5 -8 2 2.69 0.37
 -5 -8 -2 3.06 0.32
 -5 -8 -2 3.03 0.28
 5 -8 2 2.76 0.24
 -5 8 -2 2.92 0.35
 5 8 2 2.7 0.32
 5 8 2 3.57 0.33
 -5 8 -2 3.71 0.32
 5 8 2 2.97 0.34
 5 8 2 3.12 0.4
 5 8 2 3.59 0.33
 6 -8 2 0.57 0.13
 -6 -8 -2 0.56 0.11
 -6 -8 -2 0.5 0.15
 6 -8 2 0.63 0.19
 6 -8 2 0.37 0.19
 6 8 2 0.54 0.16
 6 8 2 0.68 0.19
 -6 8 -2 0.14 0.16
 6 8 2 0.46 0.14
 -6 8 -2 0.51 0.1
 6 8 2 0.38 0.16
 6 8 2 0.65 0.17
 -4 -9 2 2.16 0.17
 4 -9 -2 2.24 0.26
 -4 9 2 2.28 0.18
 4 9 -2 2.43 0.28
 4 9 -2 2.56 0.3
 -4 9 2 2.36 0.27
 4 9 -2 2.33 0.24
 3 -9 -2 0.3 0.2
 3 -9 -2 -0.07 0.14
 -3 -9 2 -0.07 0.2
 3 -9 -2 0.25 0.19
 -3 -9 2 0.09 0.11
 3 9 -2 -0.1 0.1
 3 9 -2 0.22 0.16
 3 9 -2 0.08 0.12
 -3 9 2 0.05 0.16
 -3 9 2 -0.04 0.13
 -2 -9 2 3.67 0.29
 -2 -9 2 4.78 0.33
 2 -9 -2 4.38 0.39
 2 -9 -2 3.88 0.31
 2 9 -2 4.33 0.39
 2 9 -2 4.32 0.31
 -2 9 2 4.17 0.24
 -2 9 2 4.71 0.37
 -2 9 2 4.56 0.34
 -2 9 2 4.46 0.39
 2 9 -2 4.62 0.38
 -1 -9 2 0.32 0.12
 1 -9 -2 0.52 0.15
 1 -9 -2 0.45 0.24
 -1 -9 2 0.11 0.15
 -1 -9 2 0.52 0.18
 1 -9 -2 0.46 0.2
 -1 9 2 0.41 0.14
 -1 9 2 0.44 0.21
 1 9 -2 0.38 0.12
 1 9 -2 0.34 0.18
 1 9 -2 0.34 0.14
 -1 9 2 0.24 0.18
 -1 9 2 0.35 0.16
 1 9 -2 0.48 0.19
 0 -9 2 1.16 0.24
 0 -9 -2 0.97 0.15
 0 -9 2 0.81 0.22
 0 -9 2 0.69 0.17
 0 -9 -2 0.89 0.25
 0 9 2 1.25 0.2
 0 9 -2 1.14 0.23
 0 9 2 1.03 0.23
 0 9 2 1.15 0.22
 0 9 -2 0.61 0.2
 -1 -9 -2 0.06 0.18
 1 -9 2 -0.07 0.19
 1 -9 2 0.11 0.15
 1 9 2 0.02 0.14
 -1 9 -2 -0.09 0.16
 1 9 2 0.18 0.17
 1 9 2 0.04 0.14
 -1 9 -2 0.51 0.16
 2 9 2 0.14 0.15
 -2 9 -2 0.24 0.14
 2 9 2 -0.07 0.15
 -2 9 -2 0.17 0.16
 2 9 2 0.16 0.17
 -2 9 -2 0.47 0.21
 -3 -9 -2 3.26 0.29
 -3 -9 -2 2.7 0.83
 3 -9 2 3.51 0.33
 3 -9 2 3.32 0.25
 3 -9 2 2.73 0.37
 -3 -9 -2 3.08 0.27
 -3 9 -2 3.31 0.34
 -3 9 -2 3.39 0.34
 -3 9 -2 3.36 0.21
 3 9 2 3.76 0.33
 3 9 2 3.54 0.3
 3 9 2 3.32 0.33
 -4 -9 -2 2.47 0.74
 -4 -9 -2 3.54 0.25
 4 -9 2 3.17 0.24
 4 -9 2 3.13 0.32
 -4 9 -2 3.23 0.26
 4 9 2 3.12 0.3
 4 9 2 2.67 0.29
 -4 9 -2 3.24 0.3
 4 9 2 3.2 0.27
 -11 0 3 0.04 0.14
 -11 0 3 0.09 0.09
 -11 0 3 -0.07 0.16
 11 0 -3 0.21 0.13
 -11 0 3 0.11 0.15
 -11 0 3 0.01 0.1
 -10 0 3 0.13 0.2
 -10 0 3 0.25 0.18
 -10 0 3 0.04 0.11
 -10 0 3 -0.09 0.11
 -10 0 3 -0.05 0.16
 10 0 -3 0 0.14
 -9 0 3 -0.09 0.1
 -9 0 3 0.21 0.17
 -9 0 3 0.08 0.18
 -9 0 3 0.05 0.19
 -9 0 3 0.08 0.06
 -9 0 3 0.02 0.11
 -8 0 3 0 0.1
 -8 0 3 0.03 0.08
 -8 0 3 0.11 0.2
 -8 0 3 0.07 0.11
 -8 0 3 0.36 0.2
 -8 0 3 -0.1 0.17
 7 0 -3 0 0.1
 7 0 -3 0.16 0.11
 6 0 -3 -0.04 0.08
 6 0 -3 -0.01 0.07
 5 0 -3 -0.02 0.1
 5 0 -3 0.03 0.05
 5 0 -3 0.04 0.06
 -4 0 3 -0.37 0.07
 4 0 -3 -0.22 0.05
 -4 0 3 -0.13 0.11
 -3 0 3 -0.01 0.06
 -2 0 3 -0.07 0.05
 -1 0 3 -0.04 0.05
 0 0 -3 -0.29 0.05
 0 0 3 -0.32 0.05
 -1 0 -3 -0.22 0.06
 2 0 3 0.16 0.09
 -2 0 -3 -0.09 0.06
 3 0 3 0.05 0.08
 4 0 3 -0.01 0.08
 4 0 3 0 0.08
 5 0 3 0.02 0.1
 5 0 3 -0.04 0.09
 6 0 3 0.05 0.1
 6 0 3 -0.09 0.09
 7 0 3 -0.07 0.13
 7 0 3 -0.05 0.11
 -8 0 -3 0.09 0.19
 -8 0 -3 0.22 0.19
 -8 0 -3 -0.16 0.16
 8 0 3 0.16 0.12
 -8 0 -3 0.18 0.18
 -8 0 -3 0.14 0.18
 -8 0 -3 0.16 0.16
 -9 0 -3 0.03 0.17
 -9 0 -3 0.11 0.18
 -9 0 -3 0.06 0.15
 -9 0 -3 0 0.18
 9 0 3 0.26 0.15
 9 0 3 0.06 0.22
 -9 0 -3 0.01 0.13
 -9 0 -3 -0.16 0.13
 10 0 3 0.03 0.2
 -10 0 -3 0.13 0.15
 -10 0 -3 0.15 0.13
 -10 0 -3 0.18 0.17
 10 0 3 0.15 0.13
 10 0 3 0.04 0.21
 10 0 3 -0.12 0.21
 -10 0 -3 0.2 0.17
 -10 0 -3 -0.04 0.15
 -10 0 -3 -0.04 0.16
 11 0 3 0.04 0.15
 -11 0 -3 0.11 0.13
 -11 0 -3 -0.04 0.14
 -11 0 -3 -0.13 0.13
 -11 0 -3 0.07 0.15
 -11 0 -3 0.24 0.14
 11 0 3 0.01 0.17
 -11 -1 3 1.47 0.25
 -11 -1 3 1.99 0.3
 -11 -1 3 2.08 0.31
 -11 -1 3 2.07 0.21
 -11 -1 3 2.37 0.31
 11 -1 -3 2.42 0.24
 -11 1 3 2.03 0.31
 -11 1 3 2.02 0.22
 -11 1 3 2.26 0.3
 -11 1 3 2.29 0.33
 -11 1 3 2.45 0.29
 -10 -1 3 7.22 0.57
 -10 -1 3 8.3 0.41
 -10 -1 3 8.27 0.54
 -10 -1 3 8.11 0.55
 10 -1 -3 8.48 0.43
 -10 -1 3 8.92 0.54
 -10 1 3 8.3 0.44
 -10 1 3 8.14 0.53
 -10 1 3 8.13 0.51
 -10 1 3 8.55 0.63
 10 1 -3 7.23 0.43
 -10 1 3 8.96 0.57
 -9 -1 3 10.37 0.63
 9 -1 -3 11.09 0.49
 -9 -1 3 11.38 0.61
 -9 -1 3 10.79 0.62
 -9 -1 3 11.55 0.49
 -9 -1 3 10.94 0.7
 -9 1 3 11.08 0.39
 -9 1 3 11.43 0.53
 -9 1 3 11.78 0.66
 -9 1 3 10.68 0.6
 -9 1 3 12.52 0.64
 -9 1 3 11.24 0.74
 -9 1 3 10.68 0.64
 8 -1 -3 2.22 0.38
 -8 -1 3 2.33 0.25
 -8 -1 3 2.47 0.17
 -8 -1 3 2.14 0.32
 -8 -1 3 3.24 0.4
 -8 -1 3 2 0.33
 -8 -1 3 1.82 0.3
 -8 1 3 2.56 0.32
 -8 1 3 2.71 0.37
 -8 1 3 2.54 0.33
 -8 1 3 2.25 0.25
 -8 1 3 3.06 0.36
 -8 1 3 2.38 0.24
 7 -1 -3 11.93 0.54
 7 -1 -3 12.31 0.59
 7 -1 -3 11.69 0.63
 7 1 -3 11.16 0.51
 6 -1 -3 7.32 0.45
 6 -1 -3 6.69 0.38
 6 -1 -3 7.7 0.36
 6 1 -3 7.33 0.32
 6 1 -3 6.81 0.35
 -6 1 3 6.65 0.38
 5 -1 -3 4.78 0.27
 5 -1 -3 4.56 0.32
 5 -1 -3 4.58 0.24
 5 1 -3 4.9 0.24
 -5 1 3 4.52 0.28
 5 1 -3 4.79 0.19
 4 -1 -3 5.53 0.22
 4 -1 -3 5.65 0.26
 4 1 -3 5.56 0.21
 -4 1 3 5.35 0.34
 -4 1 3 5.75 0.29
 -4 1 3 5.67 0.27
 3 -1 -3 4.74 0.18
 3 -1 -3 5.27 0.21
 -3 1 3 4.52 0.28
 -3 1 3 5.13 0.24
 -3 1 3 4.95 0.25
 2 -1 -3 14.27 0.42
 -2 1 3 14.82 0.47
 1 -1 -3 0.22 0.05
 -1 1 3 0.3 0.08
 0 -1 -3 78.62 2
 0 1 3 85.63 2.06
 1 -1 3 20.84 0.61
 -1 -1 -3 20.98 0.61
 1 1 3 22.83 0.6
 -2 -1 -3 189.65 4.76
 2 -1 3 191.44 4.79
 -2 1 -3 205.84 5.18
 2 1 3 207.27 4.78
 3 -1 3 101.68 2.67
 3 -1 3 105.07 2.71
 -3 1 -3 104.96 2.44
 -3 1 -3 102.92 2.49
 4 -1 3 3.34 0.26
 4 -1 3 2.86 0.24
 -4 1 -3 3.09 0.21
 5 -1 3 92.6 2.54
 5 -1 3 93.62 2.59
 5 -1 3 93.9 2.43
 -5 1 -3 90.54 2.24
 6 -1 3 1.5 0.18
 6 -1 3 1.57 0.24
 6 -1 3 1.65 0.26
 6 -1 3 1.79 0.25
 6 1 3 1.84 0.2
 7 -1 3 5.91 0.43
 7 -1 3 5.22 0.31
 7 -1 3 5.17 0.43
 7 1 3 5.94 0.34
 -8 -1 -3 7.91 0.52
 -8 -1 -3 8.83 0.68
 -8 -1 -3 8.36 0.52
 -8 -1 -3 8.62 0.54
 -8 -1 -3 8.13 0.48
 8 -1 3 8.35 0.41
 -8 -1 -3 7.83 0.45
 -8 1 -3 7.56 0.47
 -8 1 -3 8.25 0.54
 -8 1 -3 7.88 0.51
 -8 1 -3 9.45 0.58
 8 1 3 9.29 0.44
 -8 1 -3 10.35 0.73
 -8 1 -3 9.02 0.53
 -9 -1 -3 0.3 0.2
 9 -1 3 0.4 0.16
 -9 -1 -3 0.37 0.16
 -9 -1 -3 0.09 0.15
 -9 -1 -3 0.33 0.19
 -9 -1 -3 0.26 0.19
 -9 -1 -3 0.33 0.16
 -9 1 -3 0.14 0.16
 -9 1 -3 0.26 0.19
 -9 1 -3 0.31 0.18
 -9 1 -3 0.3 0.21
 9 1 3 0.32 0.14
 -9 1 -3 0.15 0.19
 -9 1 -3 0.19 0.2
 -9 1 -3 0.04 0.18
 10 -1 3 18.67 0.67
 -10 -1 -3 20.3 1.08
 10 -1 3 20.2 0.91
 -10 -1 -3 19.8 0.63
 10 -1 3 19.89 0.89
 -10 -1 -3 19.35 0.75
 -10 -1 -3 19.5 0.8
 10 -1 3 19.73 1.15
 -10 -1 -3 19.74 0.78
 -10 -1 -3 19.31 0.81
 -10 1 -3 18.72 0.77
 -10 1 -3 20.03 0.77
 -10 1 -3 17.78 0.73
 -10 1 -3 18.86 1.07
 -10 1 -3 20.22 0.83
 -10 1 -3 18.71 0.66
 -11 -1 -3 0.02 0.15
 -11 -1 -3 0.1 0.14
 11 -1 3 -0.01 0.15
 11 -1 3 0.16 0.15
 -11 -1 -3 0.06 0.13
 11 -1 3 0.28 0.19
 -11 -1 -3 0.35 0.14
 -11 1 -3 0.04 0.15
 -11 1 -3 0.2 0.15
 -11 1 -3 0.1 0.15
 11 1 3 0.12 0.17
 11 1 3 0.14 0.18
 -11 1 -3 0.2 0.15
 -11 1 -3 0.21 0.08
 -11 1 -3 0.08 0.15
 -11 -2 3 0.29 0.17
 -11 -2 3 0.3 0.12
 -11 -2 3 0.26 0.16
 -11 -2 3 0.42 0.17
 -11 -2 3 0.32 0.1
 11 -2 -3 0.29 0.14
 -11 2 3 0.54 0.13
 -11 2 3 0.63 0.19
 -11 2 3 0.3 0.15
 -11 2 3 0.41 0.18
 -11 2 3 0.38 0.15
 -10 -2 3 7.63 0.56
 -10 -2 3 7.34 0.38
 -10 -2 3 6.8 0.48
 10 -2 -3 7.31 0.39
 -10 -2 3 7.37 0.49
 -10 -2 3 7.13 0.51
 -10 2 3 7.1 0.59
 -10 2 3 7.31 0.5
 -10 2 3 7.99 0.53
 -10 2 3 7.37 0.42
 -10 2 3 7.28 0.48
 9 -2 -3 4.59 0.48
 9 -2 -3 4.31 0.41
 -9 -2 3 4.66 0.44
 -9 -2 3 4.81 0.45
 -9 -2 3 4.47 0.4
 -9 -2 3 4.72 0.46
 -9 -2 3 5.09 0.33
 9 -2 -3 4.8 0.33
 -9 2 3 5.54 0.31
 -9 2 3 4.66 0.44
 -9 2 3 4.15 0.47
 -9 2 3 5.27 0.38
 -9 2 3 5.52 0.49
 -9 2 3 6.05 0.46
 8 -2 -3 21.36 0.97
 -8 -2 3 21.33 0.71
 8 -2 -3 22.26 0.71
 -8 -2 3 23.01 0.91
 -8 -2 3 21.84 0.86
 8 -2 -3 21.43 0.87
 -8 -2 3 20.94 0.86
 -8 -2 3 19.2 0.99
 8 -2 -3 22.24 0.97
 -8 2 3 22.52 0.89
 -8 2 3 22.2 0.77
 -8 2 3 21.37 0.9
 -8 2 3 20.76 1.08
 -8 2 3 20.35 0.7
 -8 2 3 21.04 0.84
 7 -2 -3 23.43 0.99
 7 -2 -3 23.07 0.94
 7 -2 -3 22.96 0.7
 7 -2 -3 22.36 0.92
 7 -2 -3 22.89 0.86
 -7 2 3 22.36 0.86
 -7 2 3 22.76 0.9
 6 -2 -3 74.7 2.13
 6 -2 -3 73.3 2.03
 6 -2 -3 71.69 1.85
 6 -2 -3 74.29 2.19
 -6 2 3 76.91 2.05
 5 -2 -3 54.93 1.61
 5 -2 -3 55.51 1.54
 5 -2 -3 55.37 1.68
 5 -2 -3 56.43 1.43
 5 -2 -3 54.48 1.46
 -5 2 3 59.69 1.62
 4 -2 -3 3.56 0.24
 4 -2 -3 3.39 0.25
 4 -2 -3 4 0.23
 4 -2 -3 3.65 0.29
 -4 2 3 3.75 0.25
 -4 2 3 3.93 0.26
 3 -2 -3 16.51 0.53
 3 -2 -3 17.22 0.58
 -3 2 3 18.4 0.61
 -3 2 3 16.93 0.58
 -3 2 3 16.8 0.65
 2 -2 -3 343.19 8.41
 2 -2 -3 334.7 8.2
 -2 2 3 355.36 8.07
 -2 2 3 338.5 7.65
 2 2 -3 340.65 8.48
 -2 2 3 343.25 8.38
 1 -2 -3 73.72 1.95
 1 -2 -3 75.05 1.89
 -1 2 3 79.1 1.98
 0 -2 -3 101.19 2.58
 0 -2 -3 98.6 2.5
 0 2 3 105.39 2.57
 -1 -2 -3 5.53 0.26
 1 -2 3 5.62 0.26
 1 2 3 5.54 0.25
 -1 2 -3 5.55 0.26
 2 -2 3 3.12 0.2
 2 -2 3 3.27 0.22
 2 -2 3 3 0.23
 -2 2 -3 3.52 0.21
 -2 2 -3 3.52 0.23
 -2 2 -3 3.34 0.22
 2 2 3 3.19 0.17
 3 -2 3 84.28 2.29
 3 -2 3 86.42 2.31
 3 -2 3 85.11 2.23
 -3 2 -3 92.62 2.23
 -3 2 -3 90.34 2.29
 4 -2 3 194.79 4.41
 4 -2 3 196.98 5.01
 4 -2 3 197.19 4.74
 4 -2 3 200.43 5.11
 -4 2 -3 202.88 4.9
 -4 2 -3 206.87 4.74
 5 -2 3 0.7 0.16
 5 -2 3 0.89 0.2
 5 -2 3 1.01 0.15
 5 -2 3 0.87 0.2
 5 -2 3 1.14 0.18
 5 -2 3 0.87 0.2
 -5 2 -3 1.1 0.19
 6 -2 3 3.01 0.34
 6 -2 3 2.9 0.31
 6 -2 3 3.94 0.36
 6 -2 3 2.92 0.22
 6 2 3 3.07 0.25
 -6 2 -3 3.13 0.29
 7 -2 3 0.15 0.17
 7 -2 3 0.23 0.13
 7 -2 3 0.44 0.21
 7 -2 3 0.17 0.17
 -7 -2 -3 0.25 0.2
 -7 -2 -3 -0.02 0.16
 7 2 3 0.67 0.18
 -7 2 -3 0.09 0.14
 -7 2 -3 0.25 0.18
 -8 -2 -3 -0.07 0.14
 8 -2 3 -0.02 0.12
 -8 -2 -3 0.21 0.19
 -8 -2 -3 -0.03 0.13
 -8 -2 -3 -0.01 0.15
 8 -2 3 0.07 0.21
 8 -2 3 -0.08 0.2
 -8 -2 -3 0.11 0.14
 8 -2 3 0.19 0.21
 -8 -2 -3 -0.02 0.19
 -8 2 -3 -0.15 0.15
 -8 2 -3 0.15 0.19
 -8 2 -3 0.1 0.2
 -8 2 -3 -0.3 0.17
 -8 2 -3 -0.14 0.18
 9 -2 3 1.64 0.24
 -9 -2 -3 1.79 0.31
 -9 -2 -3 1.44 0.25
 9 -2 3 1.54 0.3
 -9 -2 -3 1.73 0.25
 9 -2 3 1.47 0.36
 -9 -2 -3 0.76 0.23
 -9 -2 -3 1.84 0.39
 9 -2 3 1.11 0.3
 -9 -2 -3 1.33 0.27
 -9 2 -3 1.83 0.29
 -9 2 -3 1.59 0.29
 -9 2 -3 1.41 0.3
 -9 2 -3 1.48 0.28
 -9 2 -3 1.63 0.27
 10 -2 3 12.6 0.88
 -10 -2 -3 13.42 0.6
 -10 -2 -3 14.23 0.65
 10 -2 3 13.54 0.53
 10 -2 3 13.25 0.73
 -10 -2 -3 13.6 0.85
 -10 -2 -3 14.64 0.64
 10 -2 3 13.45 0.69
 -10 -2 -3 13.66 0.46
 -10 2 -3 12.51 0.61
 -10 2 -3 12.26 0.58
 10 2 3 13.97 0.8
 -10 2 -3 12.59 0.54
 -10 2 -3 13.71 0.86
 -10 2 -3 14.53 0.67
 11 -2 3 4.29 0.45
 11 -2 3 5.06 0.41
 -11 -2 -3 4.8 0.32
 -11 -2 -3 4.6 0.44
 -11 -2 -3 4.67 0.33
 -11 -2 -3 5.01 0.36
 11 -2 3 4.59 0.36
 -11 2 -3 4.49 0.35
 11 2 3 4.02 0.47
 11 2 3 4.16 0.36
 -11 2 -3 4.3 0.21
 -11 2 -3 3.84 0.31
 -11 -3 3 14.83 0.57
 11 -3 -3 15.62 0.85
 -11 -3 3 16.23 0.62
 11 -3 -3 16.02 0.65
 -11 -3 3 15.61 0.46
 -11 -3 3 15.72 0.76
 -11 3 3 16.36 0.59
 -11 3 3 15.28 0.79
 -11 3 3 15.77 0.58
 -11 3 3 15.42 0.61
 -11 3 3 15.79 0.55
 -10 -3 3 0.45 0.13
 -10 -3 3 0.42 0.19
 10 -3 -3 0.33 0.23
 -10 -3 3 0.33 0.14
 10 -3 -3 0.35 0.14
 10 -3 -3 0.45 0.21
 -10 -3 3 0.41 0.19
 -10 3 3 0.28 0.19
 -10 3 3 0.25 0.15
 -10 3 3 0.35 0.16
 -10 3 3 0.47 0.2
 -10 3 3 0.51 0.2
 -10 3 3 0.46 0.19
 9 -3 -3 13.08 0.74
 -9 -3 3 12.12 0.52
 -9 -3 3 12.61 0.64
 -9 -3 3 12.93 0.67
 -9 -3 3 12 0.75
 -9 -3 3 13.28 0.66
 9 -3 -3 12.44 0.52
 9 -3 -3 12.69 0.64
 -9 3 3 13.48 0.7
 -9 3 3 12.95 0.65
 -9 3 3 12.51 0.83
 -9 3 3 12.36 0.5
 -9 3 3 13.14 0.59
 -9 3 3 12.58 0.64
 8 -3 -3 23.35 0.96
 8 -3 -3 24.9 1.09
 -8 -3 3 22.96 0.9
 8 -3 -3 24.99 0.77
 -8 -3 3 22.42 1.1
 8 -3 -3 24.89 1.05
 -8 -3 3 22.69 0.76
 -8 -3 3 22.8 0.93
 8 -3 -3 22.57 0.91
 -8 -3 3 23.54 0.92
 -8 3 3 23.36 0.85
 -8 3 3 22.69 0.95
 -8 3 3 23.09 0.92
 -8 3 3 23 1.2
 -8 3 3 23.57 0.97
 -8 3 3 24.65 0.92
 -8 3 3 24.18 0.79
 7 -3 -3 28.82 1.05
 -7 -3 3 28.77 1.02
 7 -3 -3 27.98 0.82
 -7 -3 3 28.3 1
 -7 -3 3 26.47 1.21
 7 -3 -3 26.46 1.09
 7 -3 -3 27.12 1.02
 -7 -3 3 27.73 0.98
 7 -3 -3 29.12 1.17
 7 -3 -3 28.81 1
 7 -3 -3 29.07 1.11
 -7 -3 3 27.52 0.84
 -7 3 3 29.97 1.04
 -7 3 3 28.46 1.35
 -7 3 3 28.67 1
 -7 3 3 29.87 1.1
 -7 3 3 28.73 1.02
 -7 3 3 30.14 1.07
 -7 3 3 29.56 0.92
 -7 3 3 28.6 0.96
 6 -3 -3 4.58 0.41
 6 -3 -3 4.36 0.38
 6 -3 -3 4.15 0.4
 6 -3 -3 4.3 0.37
 6 -3 -3 3.94 0.32
 6 -3 -3 4.08 0.33
 6 -3 -3 4.09 0.34
 6 -3 -3 4.14 0.27
 -6 3 3 4.28 0.46
 -6 3 3 4.29 0.36
 5 -3 -3 94.29 2.7
 5 -3 -3 98.52 2.6
 5 -3 -3 93.7 2.4
 5 -3 -3 98.75 2.14
 5 -3 -3 93.87 2.34
 5 -3 -3 100.27 2.75
 -5 3 3 94.11 2.58
 -5 3 3 100.69 2.52
 4 -3 -3 0.04 0.12
 4 -3 -3 0.08 0.1
 4 -3 -3 -0.04 0.1
 4 -3 -3 -0.01 0.09
 4 -3 -3 0.22 0.13
 -4 3 3 -0.02 0.09
 -4 3 3 0.05 0.11
 3 -3 -3 244.54 6.03
 3 -3 -3 235.31 5.27
 3 -3 -3 242.99 5.86
 3 -3 -3 233.98 5.12
 3 -3 -3 224.5 5.91
 -3 3 3 257.15 6.05
 -3 3 3 244.96 5.73
 2 -3 -3 43.9 1.21
 2 -3 -3 43.61 1.26
 2 -3 -3 42.15 1.14
 2 -3 -3 39.04 1.24
 -2 3 3 42.25 1.19
 -2 3 3 45.64 1.28
 1 -3 -3 197.68 5.29
 1 -3 -3 220.94 5.31
 1 -3 -3 226.65 5.46
 -1 3 3 227.61 5.2
 1 3 -3 231.05 5.16
 -1 3 3 232.3 5.52
 0 -3 -3 4.83 0.28
 0 -3 -3 4.85 0.26
 0 3 3 4.83 0.23
 0 3 -3 5.11 0.26
 0 3 3 5.18 0.29
 1 -3 3 6.5 0.35
 1 -3 3 7.34 0.37
 -1 3 -3 7.45 0.34
 -1 3 -3 7.48 0.38
 1 3 3 7.61 0.35
 2 -3 3 5.39 0.3
 2 -3 3 5.3 0.33
 2 3 3 6.1 0.3
 -2 3 -3 5.54 0.31
 -2 3 -3 7.05 0.36
 3 -3 3 2.17 0.25
 3 -3 3 2.34 0.22
 3 -3 3 1.97 0.23
 3 -3 3 2.19 0.21
 3 -3 3 1.72 0.22
 3 -3 3 2.33 0.22
 -3 3 -3 2.27 0.24
 -3 3 -3 2.23 0.21
 4 -3 3 0.57 0.15
 4 -3 3 0.51 0.17
 4 -3 3 0.76 0.18
 4 -3 3 0.95 0.16
 4 -3 3 0.73 0.19
 4 -3 3 0.66 0.16
 -4 3 -3 0.67 0.17
 -4 3 -3 0.86 0.19
 5 -3 3 67.15 2.03
 5 -3 3 67.23 1.55
 5 -3 3 65.83 1.76
 5 -3 3 68.05 1.73
 5 -3 3 64.7 1.92
 -5 3 -3 73.4 2
 6 -3 3 4.23 0.4
 6 -3 3 4.06 0.26
 6 -3 3 3.45 0.32
 6 -3 3 3.76 0.38
 6 -3 3 4.03 0.34
 6 -3 3 4.05 0.36
 -6 3 -3 4.48 0.39
 -7 -3 -3 5.41 0.56
 7 -3 3 7.63 0.64
 -7 -3 -3 5.2 0.4
 7 -3 3 6.09 0.35
 7 -3 3 6.37 0.54
 -7 -3 -3 5.76 0.44
 7 -3 3 5.93 0.49
 7 -3 3 6.2 0.51
 -7 -3 -3 4.81 0.37
 -7 -3 -3 5.82 0.48
 -7 -3 -3 5.82 0.45
 -7 3 -3 4.89 0.44
 -7 3 -3 6.64 0.47
 -7 3 -3 5.34 0.36
 -7 3 -3 6.3 0.49
 8 -3 3 0.58 0.25
 -8 -3 -3 0.35 0.17
 8 -3 3 0.39 0.15
 8 -3 3 0.45 0.25
 -8 -3 -3 0.29 0.14
 -8 -3 -3 0.38 0.19
 -8 -3 -3 0.26 0.19
 8 -3 3 0.38 0.23
 8 -3 3 0.38 0.2
 -8 -3 -3 0.36 0.17
 -8 -3 -3 0.27 0.19
 -8 3 -3 0.41 0.11
 -8 3 -3 0.23 0.19
 -8 3 -3 0.1 0.2
 9 -3 3 4.28 0.56
 -9 -3 -3 4.36 0.41
 9 -3 3 4.16 0.43
 -9 -3 -3 4.01 0.39
 -9 -3 -3 4.26 0.31
 -9 -3 -3 4.01 0.36
 -9 -3 -3 4.42 0.52
 9 -3 3 3.85 0.31
 9 -3 3 4.08 0.47
 -9 3 -3 3.78 0.41
 -9 3 -3 4.33 0.39
 -10 -3 -3 1.53 0.25
 10 -3 3 0.97 0.25
 10 -3 3 1.69 0.3
 -10 -3 -3 0.93 0.21
 10 -3 3 1 0.25
 -10 -3 -3 1.21 0.21
 -10 -3 -3 1.42 0.24
 10 -3 3 1.04 0.18
 10 3 3 1.65 0.29
 -10 3 -3 1.12 0.25
 -10 3 -3 1.47 0.22
 -10 3 -3 0.78 0.21
 10 3 3 1.35 0.32
 11 -3 3 13.62 0.69
 -11 -3 -3 13.21 0.52
 -11 -3 -3 13.41 0.72
 11 -3 3 12.86 0.6
 -11 -3 -3 13.51 0.53
 11 -3 3 12.76 0.53
 -11 -3 -3 13.19 0.49
 -11 3 -3 12.93 0.36
 11 3 3 13.69 0.76
 -11 3 -3 13.29 0.54
 11 3 3 12.82 0.57
 -11 3 -3 12.88 0.52
 -10 -4 3 8.65 0.49
 -10 -4 3 9.54 0.6
 10 -4 -3 9.26 0.39
 10 -4 -3 9.19 0.52
 -10 -4 3 9.5 0.48
 -10 -4 3 9.82 0.39
 10 -4 -3 9.23 0.67
 -10 4 3 10.2 0.48
 -10 4 3 8.9 0.49
 -10 4 3 9.77 0.66
 -10 4 3 9.07 0.5
 -10 4 3 9.44 0.48
 -10 4 3 9.63 0.48
 -9 -4 3 5.49 0.44
 -9 -4 3 5.76 0.49
 -9 -4 3 5.26 0.42
 -9 -4 3 5.22 0.32
 9 -4 -3 5.02 0.4
 9 -4 -3 5.24 0.49
 9 -4 -3 4.94 0.6
 9 -4 -3 5.25 0.46
 9 -4 -3 5.29 0.33
 -9 4 3 5.1 0.42
 -9 4 3 5.35 0.34
 -9 4 3 5.8 0.57
 -9 4 3 5.24 0.45
 -9 4 3 5.22 0.42
 -9 4 3 5.77 0.4
 8 -4 -3 7.83 0.84
 8 -4 -3 7.54 0.4
 8 -4 -3 7.1 0.48
 8 -4 -3 7.07 0.6
 -8 -4 3 7.18 0.48
 -8 -4 3 7.92 0.54
 -8 -4 3 7.41 0.4
 8 -4 -3 7.23 0.57
 -8 -4 3 7.29 0.57
 -8 4 3 7.33 0.68
 -8 4 3 7.44 0.47
 -8 4 3 8.01 0.56
 -8 4 3 6.78 0.48
 -8 4 3 7.56 0.5
 -8 4 3 7.44 0.5
 -8 4 3 6.88 0.43
 -7 -4 3 16.4 0.72
 -7 -4 3 16.06 0.73
 7 -4 -3 16.57 0.74
 7 -4 -3 16.92 0.87
 7 -4 -3 15.68 0.58
 -7 -4 3 15.98 0.47
 7 -4 -3 16.28 0.82
 -7 -4 3 16.31 0.61
 -7 -4 3 16.11 0.89
 -7 -4 3 17.37 0.76
 7 -4 -3 15.11 0.73
 7 -4 -3 14.17 0.74
 7 -4 -3 15.19 0.71
 7 -4 -3 16.7 0.83
 -7 4 3 16.56 0.72
 -7 4 3 16.45 0.8
 -7 4 3 16.93 0.69
 -7 4 3 16.25 0.75
 -7 4 3 16.14 0.78
 -7 4 3 20.27 1.09
 -7 4 3 16.41 0.76
 -7 4 3 16.01 0.75
 6 -4 -3 22.88 0.86
 6 -4 -3 21.54 0.69
 6 -4 -3 22.08 0.94
 6 -4 -3 23.33 1
 -6 -4 3 22.57 0.74
 6 -4 -3 23.18 0.88
 -6 -4 3 21.98 0.87
 -6 -4 3 20.88 0.83
 6 -4 -3 23.94 0.92
 6 -4 -3 21.86 0.85
 -6 -4 3 22.81 0.66
 -6 -4 3 21.66 1.08
 6 -4 -3 22.02 0.99
 6 -4 -3 22.33 0.96
 -6 4 3 22.33 0.9
 -6 4 3 24.76 0.97
 -6 4 3 23.52 0.92
 -6 4 3 23.04 0.84
 -6 4 3 23.08 0.92
 -6 4 3 23.23 0.68
 5 -4 -3 4.86 0.36
 5 -4 -3 4.06 0.26
 5 -4 -3 4.23 0.34
 5 -4 -3 3.72 0.36
 5 -4 -3 3.95 0.34
 5 -4 -3 3.96 0.34
 5 -4 -3 4.01 0.37
 5 -4 -3 4.09 0.39
 -5 4 3 4.11 0.35
 -5 4 3 3.9 0.36
 4 -4 -3 113.71 2.74
 4 -4 -3 113.51 3.03
 4 -4 -3 114.58 2.82
 4 -4 -3 114.47 2.49
 4 -4 -3 111.76 3.18
 4 -4 -3 118.44 3.18
 4 -4 -3 114.81 3.06
 -4 4 3 121.08 3.1
 -4 4 3 127.47 3.28
 3 -4 -3 2.22 0.19
 3 -4 -3 2.22 0.26
 3 -4 -3 2.28 0.24
 3 -4 -3 1.87 0.23
 3 -4 -3 2.33 0.25
 3 -4 -3 2.11 0.25
 3 4 -3 2.07 0.23
 -3 4 3 2.28 0.24
 -3 4 3 2.39 0.27
 2 -4 -3 63.81 1.81
 2 -4 -3 62.23 1.83
 2 -4 -3 63.61 1.75
 2 -4 -3 60.68 1.57
 2 -4 -3 59.31 1.62
 2 4 -3 67.48 1.86
 -2 4 3 65.85 1.89
 -2 4 3 67.91 1.77
 1 -4 -3 25.31 0.79
 1 -4 -3 25.57 0.82
 -1 -4 3 27.76 0.83
 1 -4 -3 26.29 0.88
 -1 4 3 29.16 0.88
 -1 4 3 28.88 0.97
 1 4 -3 29.4 0.97
 0 -4 -3 30.53 0.88
 0 -4 3 27.65 0.88
 0 4 3 31.43 0.91
 0 4 -3 33.36 1.06
 0 4 3 32.97 1.04
 0 4 -3 32.9 0.96
 1 -4 3 3.7 0.3
 1 -4 3 3.91 0.27
 1 -4 3 3.39 0.26
 -1 4 -3 4.1 0.28
 -1 4 -3 4.23 0.32
 1 4 3 4.19 0.29
 2 -4 3 2.17 0.24
 2 -4 3 1.92 0.22
 2 -4 3 2.37 0.23
 2 -4 3 1.68 0.23
 -2 4 -3 2.47 0.26
 2 4 3 2.23 0.22
 -2 4 -3 1.96 0.22
 3 -4 3 49.35 1.39
 3 -4 3 48.91 1.35
 3 -4 3 50.93 1.57
 3 -4 3 46.45 1.45
 -3 4 -3 57.12 1.68
 -3 4 -3 55.54 1.6
 4 -4 3 25.8 0.87
 4 -4 3 26.02 0.71
 4 -4 3 26.51 1.03
 4 -4 3 24.37 0.95
 4 -4 3 26.1 0.99
 4 -4 3 24.44 0.88
 -4 4 -3 28.72 1.01
 -4 4 -3 29.04 1.05
 5 -4 3 1.06 0.23
 5 -4 3 1.1 0.23
 5 -4 3 1.02 0.16
 5 -4 3 1.04 0.25
 5 -4 3 1.17 0.26
 5 -4 3 1.11 0.27
 5 -4 3 0.87 0.21
 -5 4 -3 1.45 0.27
 6 -4 3 21.8 0.95
 6 -4 3 22.06 0.68
 -6 -4 -3 20.75 0.82
 6 -4 3 20.84 0.87
 -6 -4 -3 20.51 1.11
 6 -4 3 21.06 0.98
 6 -4 3 20.06 1.13
 -6 -4 -3 19.84 0.75
 6 -4 3 21.7 0.84
 6 -4 3 20.61 0.84
 6 -4 3 20.84 0.93
 -6 4 -3 21.47 0.68
 -6 4 -3 23.53 0.93
 -6 4 -3 20.88 0.89
 -6 4 -3 21.43 0.82
 -7 -4 -3 8.6 0.51
 -7 -4 -3 7.37 0.52
 -7 -4 -3 8.62 0.52
 7 -4 3 9.22 0.65
 7 -4 3 9.13 0.57
 7 -4 3 9.1 0.58
 7 -4 3 9.17 0.43
 -7 -4 -3 9.49 0.72
 7 -4 3 9.47 0.62
 -7 -4 -3 8.02 0.46
 7 -4 3 8.98 0.72
 -7 4 -3 8.9 0.57
 -7 4 -3 8.62 0.46
 -7 4 -3 8.64 0.57
 -7 4 -3 8.86 0.59
 8 -4 3 0.77 0.18
 -8 -4 -3 0.52 0.21
 8 -4 3 1.29 0.3
 8 -4 3 1.01 0.31
 8 -4 3 0.77 0.26
 -8 -4 -3 0.67 0.17
 8 -4 3 0.51 0.2
 -8 -4 -3 1.06 0.24
 -8 -4 -3 1.04 0.24
 -8 -4 -3 0.89 0.23
 -8 4 -3 1.19 0.16
 -8 4 -3 0.8 0.24
 -8 4 -3 1.06 0.26
 -8 4 -3 0.89 0.26
 -9 -4 -3 3.66 0.33
 9 -4 3 3.45 0.45
 9 -4 3 3.63 0.28
 9 -4 3 3.94 0.37
 9 -4 3 4.16 0.44
 9 -4 3 3.64 0.48
 -9 -4 -3 4.18 0.39
 -9 -4 -3 4.21 0.49
 -9 -4 -3 3.66 0.36
 -9 4 -3 3.61 0.36
 -9 4 -3 4.12 0.41
 9 4 3 3.13 0.42
 9 4 3 3.6 0.54
 10 -4 3 3.04 0.29
 -10 -4 -3 3.55 0.31
 10 -4 3 3.44 0.37
 -10 -4 -3 3.49 0.4
 -10 -4 -3 3.58 0.3
 10 -4 3 3.15 0.37
 -10 -4 -3 3.92 0.33
 -10 4 -3 3.22 0.34
 10 4 3 3.2 0.34
 10 4 3 2.94 0.43
 -10 4 -3 3 0.28
 10 -5 -3 0.12 0.11
 -10 -5 3 0.06 0.07
 -10 -5 3 -0.01 0.08
 -10 -5 3 0.09 0.12
 10 -5 -3 0.07 0.13
 -10 -5 3 0.11 0.12
 -10 5 3 -0.04 0.12
 -10 5 3 -0.02 0.11
 -10 5 3 0.11 0.13
 -10 5 3 0.12 0.13
 -10 5 3 -0.05 0.11
 -9 -5 3 3.54 0.26
 9 -5 -3 3.18 0.43
 -9 -5 3 3.48 0.33
 9 -5 -3 3.33 0.44
 -9 -5 3 3.15 0.36
 9 -5 -3 2.95 0.26
 -9 -5 3 3.26 0.38
 9 -5 -3 3.42 0.35
 -9 5 3 3.12 0.27
 -9 5 3 3.82 0.34
 -9 5 3 4.01 0.37
 -9 5 3 3.16 0.32
 -9 5 3 3.6 0.34
 8 -5 -3 0.21 0.21
 8 -5 -3 0.29 0.14
 -8 -5 3 -0.11 0.1
 8 -5 -3 -0.11 0.15
 -8 -5 3 0.39 0.19
 -8 -5 3 0.05 0.16
 -8 -5 3 0.09 0.11
 8 -5 -3 0.09 0.2
 8 -5 -3 0.04 0.18
 8 -5 -3 -0.02 0.2
 8 -5 -3 0.13 0.15
 -8 5 3 0.07 0.14
 -8 5 3 0 0.16
 -8 5 3 0.13 0.16
 -8 5 3 0.14 0.16
 -8 5 3 0.29 0.19
 -8 5 3 0.25 0.18
 7 -5 -3 10.51 0.66
 -7 -5 3 10.07 0.7
 7 -5 -3 10.29 0.79
 7 -5 -3 10.65 0.61
 7 -5 -3 9.98 0.65
 7 -5 -3 9.96 0.68
 -7 -5 3 9.56 0.58
 7 -5 -3 10.42 0.59
 -7 -5 3 10.42 1.53
 -7 -5 3 9.93 0.33
 7 -5 -3 10.47 0.57
 -7 -5 3 10.5 0.58
 -7 -5 3 10.01 0.48
 7 -5 -3 10.45 0.46
 -7 5 3 10.64 0.59
 -7 5 3 10.17 0.64
 -7 5 3 10.6 0.62
 -7 5 3 10.34 0.55
 -7 5 3 11.2 0.65
 -7 5 3 9.17 0.56
 6 -5 -3 0.67 0.29
 6 -5 -3 0.21 0.22
 -6 -5 3 0.37 0.14
 -6 -5 3 0.69 0.23
 -6 -5 3 0.16 0.11
 6 -5 -3 0.2 0.16
 6 -5 -3 0.18 0.2
 -6 -5 3 0.24 0.2
 6 -5 -3 0.06 0.2
 -6 -5 3 0.1 0.24
 6 -5 -3 0.3 0.2
 -6 -5 3 0.22 0.14
 6 -5 -3 0.21 0.14
 6 -5 -3 0.3 0.19
 -6 5 3 0.18 0.18
 -6 5 3 0.54 0.21
 -6 5 3 0.24 0.22
 -6 5 3 0.17 0.23
 -6 5 3 0.33 0.22
 -6 5 3 0.18 0.14
 -6 5 3 0.39 0.2
 5 -5 -3 6.54 0.47
 -5 -5 3 7.27 0.41
 5 -5 -3 6.96 0.44
 5 -5 -3 6.84 0.53
 -5 -5 3 6.62 0.35
 5 -5 -3 7.34 0.53
 5 -5 -3 7.32 0.48
 5 -5 -3 7.34 0.54
 -5 -5 3 6.67 0.55
 -5 -5 3 6.84 0.47
 -5 -5 3 7.06 0.48
 -5 5 3 6.74 0.42
 -5 5 3 7.68 0.52
 -5 5 3 6.66 0.49
 -5 5 3 7.96 0.53
 -5 5 3 7.32 0.5
 -5 5 3 6.41 0.49
 -5 5 3 7.86 0.54
 4 -5 -3 0.04 0.12
 4 -5 -3 0.14 0.11
 4 -5 -3 0.12 0.14
 4 -5 -3 0.01 0.12
 4 -5 -3 -0.14 0.13
 4 -5 -3 -0.17 0.14
 4 -5 -3 0.09 0.14
 -4 5 3 0.03 0.16
 -4 5 3 -0.06 0.16
 -4 5 3 0.04 0.14
 3 -5 -3 7.45 0.41
 3 -5 -3 8.07 0.52
 3 -5 -3 7.18 0.49
 3 -5 -3 7.64 0.46
 3 -5 -3 7.86 0.48
 3 -5 -3 7.63 0.34
 3 -5 -3 7.32 0.44
 -3 5 3 7.66 0.51
 -3 5 3 8.56 0.47
 3 5 -3 8.1 0.49
 2 -5 -3 36.35 0.93
 2 -5 -3 37.8 1.26
 2 -5 -3 36.86 1.12
 2 -5 -3 35.38 1.23
 2 -5 -3 37.99 1.16
 2 5 -3 38.25 1.27
 -2 5 3 37.11 1.29
 -2 5 3 40.06 1.2
 1 -5 -3 3.67 0.32
 1 -5 -3 4.35 0.31
 -1 -5 3 4.02 0.32
 -1 5 3 3.92 0.3
 -1 5 3 3.73 0.35
 1 5 -3 4.18 0.35
 0 -5 3 28.53 0.94
 0 -5 -3 28.39 0.89
 0 -5 -3 29.01 0.92
 0 -5 3 28.06 0.91
 0 5 -3 29.02 0.93
 0 5 3 28.7 1.03
 0 5 -3 29.05 1.05
 1 -5 3 1.87 0.24
 1 -5 3 1.41 0.22
 1 -5 3 2.04 0.26
 -1 5 -3 2.17 0.26
 1 5 3 1.97 0.24
 -1 5 -3 1.48 0.26
 2 -5 3 8.01 0.5
 2 -5 3 7.89 0.46
 2 -5 3 7.54 0.52
 2 -5 3 7.06 0.42
 -2 5 -3 8.89 0.53
 -2 5 -3 8.14 0.48
 2 5 3 7.96 0.47
 3 -5 3 0.33 0.16
 3 -5 3 0.38 0.17
 3 -5 3 0.39 0.16
 3 -5 3 0.38 0.16
 3 -5 3 0.34 0.18
 -3 5 -3 0.19 0.14
 -3 5 -3 0.41 0.2
 4 -5 3 1.08 0.28
 4 -5 3 0.66 0.22
 4 -5 3 1.22 0.26
 4 -5 3 0.66 0.2
 4 -5 3 0.69 0.2
 -4 5 -3 0.96 0.23
 -4 5 -3 0.9 0.26
 -4 5 -3 0.88 0.24
 -5 -5 -3 4.49 0.42
 -5 -5 -3 4.85 0.39
 -5 -5 -3 5.25 0.53
 5 -5 3 5.24 0.42
 5 -5 3 4.58 0.43
 5 -5 3 5.17 0.48
 -5 -5 -3 3.74 0.43
 5 -5 3 4.75 0.48
 -5 -5 -3 7.69 1.1
 5 -5 3 4.73 0.39
 5 -5 3 4.48 0.51
 -5 -5 -3 4.63 0.39
 5 -5 3 4.39 0.41
 -5 5 -3 5.47 0.47
 -5 5 -3 5.48 0.47
 -5 5 -3 4.19 0.44
 -5 5 -3 5.28 0.4
 -6 -5 -3 2.01 0.31
 6 -5 3 2.27 0.32
 6 -5 3 2.18 0.41
 -6 -5 -3 2.34 0.34
 -6 -5 -3 2.37 0.41
 6 -5 3 2 0.35
 -6 -5 -3 2.17 0.29
 6 -5 3 2.25 0.37
 6 -5 3 2.51 0.36
 -6 -5 -3 2.26 0.34
 6 -5 3 2.38 0.33
 6 -5 3 2.03 0.32
 -6 5 -3 2.45 0.37
 -6 5 -3 2.19 0.34
 -6 5 -3 2.42 0.24
 -6 5 -3 2.43 0.34
 -7 -5 -3 0.06 0.18
 7 -5 3 0.26 0.19
 -7 -5 -3 0.39 0.18
 -7 -5 -3 0.46 0.19
 7 -5 3 0.4 0.18
 7 -5 3 0.32 0.2
 7 -5 3 0.49 0.25
 -7 -5 -3 0.5 0.2
 7 -5 3 0.41 0.25
 7 -5 3 0.49 0.24
 7 -5 3 0.47 0.21
 -7 -5 -3 0.36 0.21
 -7 5 -3 0.48 0.23
 -7 5 -3 0.47 0.22
 -7 5 -3 0.48 0.19
 8 -5 3 0.25 0.23
 8 -5 3 0.64 0.25
 8 -5 3 0.21 0.18
 -8 -5 -3 0.1 0.16
 -8 -5 -3 0.27 0.18
 8 -5 3 0.23 0.15
 -8 -5 -3 0.21 0.16
 -8 -5 -3 0.42 0.18
 -8 -5 -3 0.28 0.14
 8 5 3 0.33 0.22
 -8 5 -3 0.29 0.19
 -8 5 -3 0.25 0.19
 8 5 3 0.29 0.2
 9 -5 3 1.24 0.29
 -9 -5 -3 0.89 0.22
 -9 -5 -3 0.72 0.18
 9 -5 3 1.51 0.24
 -9 -5 -3 0.68 0.2
 9 -5 3 0.99 0.24
 -9 -5 -3 0.98 0.11
 -9 -5 -3 1.07 0.2
 -9 5 -3 1.04 0.22
 9 5 3 1.04 0.24
 -9 5 -3 1.11 0.25
 9 5 3 0.97 0.26
 10 -5 3 2.54 0.31
 -10 -5 -3 2.8 0.25
 -10 -5 -3 2.54 0.24
 -10 -5 -3 2.47 0.22
 -10 -5 -3 2.72 0.32
 10 -5 3 2.32 0.29
 10 5 3 2.74 0.27
 -10 5 -3 2.29 0.21
 -10 5 -3 2.05 0.24
 10 5 3 2.46 0.33
 -10 5 -3 2.87 0.27
 -9 -6 3 2.27 0.25
 9 -6 -3 2.29 0.3
 -9 -6 3 1.69 0.25
 9 -6 -3 1.82 0.22
 -9 -6 3 2 0.28
 -9 -6 3 1.84 0.18
 -9 6 3 1.65 0.18
 -9 6 3 2.09 0.24
 -9 6 3 1.82 0.27
 8 -6 -3 0.07 0.13
 8 -6 -3 -0.11 0.19
 -8 -6 3 0.03 0.11
 8 -6 -3 0.2 0.2
 -8 -6 3 0.31 0.16
 -8 -6 3 0.41 0.16
 -8 -6 3 0.11 0.12
 8 -6 -3 -0.01 0.14
 -8 -6 3 -0.12 0.13
 -8 6 3 0.14 0.16
 -8 6 3 0.07 0.16
 -8 6 3 0.08 0.14
 -8 6 3 -0.03 0.15
 -7 -6 3 -0.19 0.14
 -7 -6 3 0.02 0.11
 7 -6 -3 0.02 0.19
 -7 -6 3 0.11 0.17
 7 -6 -3 -0.06 0.15
 7 -6 -3 -0.18 0.17
 7 -6 -3 0.25 0.19
 7 -6 -3 0.29 0.21
 7 -6 -3 -0.04 0.13
 -7 -6 3 0.09 0.17
 -7 -6 3 -0.05 0.11
 7 -6 -3 0.1 0.13
 -7 6 3 0.09 0.17
 -7 6 3 -0.01 0.16
 -7 6 3 0.07 0.15
 -7 6 3 0.04 0.17
 -7 6 3 0.04 0.21
 -6 -6 3 11.91 0.77
 -6 -6 3 12.18 0.55
 -6 -6 3 11.73 0.61
 6 -6 -3 11.82 0.47
 -6 -6 3 12.35 0.6
 6 -6 -3 10.71 0.71
 6 -6 -3 11.48 0.69
 -6 -6 3 11.31 0.43
 6 -6 -3 11.29 0.56
 6 -6 -3 11.14 0.61
 -6 -6 3 12.12 1.64
 6 -6 -3 12.09 0.7
 6 -6 -3 10.61 0.77
 6 -6 -3 11.74 0.65
 -6 6 3 12.99 0.69
 -6 6 3 11.49 0.61
 -6 6 3 12.92 0.46
 -6 6 3 12.93 0.64
 -6 6 3 13.4 0.74
 -6 6 3 11.87 0.63
 -6 6 3 12.37 0.69
 5 -6 -3 41.13 1.06
 -5 -6 3 38.96 3.11
 5 -6 -3 38.35 1.48
 5 -6 -3 41.18 1.29
 -5 -6 3 40.29 1.24
 -5 -6 3 39.47 1.27
 -5 -6 3 40.15 1.72
 5 -6 -3 41.22 1.43
 5 -6 -3 38.91 1.72
 -5 -6 3 41.15 1.06
 5 -6 -3 37.88 1.29
 5 -6 -3 39.09 1.33
 -5 -6 3 40.3 1.09
 5 -6 -3 41.44 1.48
 -5 -6 3 39.67 1.2
 -5 6 3 41.79 1.33
 -5 6 3 44.84 1.42
 -5 6 3 40.51 1.41
 -5 6 3 40.95 1.32
 -5 6 3 41.32 1.2
 4 -6 -3 54.98 1.68
 -4 -6 3 57.94 3.94
 4 -6 -3 55.5 1.36
 4 -6 -3 54.54 1.75
 4 -6 -3 55.36 1.82
 4 -6 -3 53.61 2.19
 -4 -6 3 58.14 1.57
 4 -6 -3 56.52 1.65
 -4 -6 3 56.44 1.55
 -4 -6 3 54.15 1.58
 4 -6 -3 57 1.88
 4 -6 -3 54.91 1.63
 -4 -6 3 55.95 1.45
 -4 -6 3 55.99 2.22
 -4 6 3 59.82 1.6
 -4 6 3 56.15 1.69
 -4 6 3 55.47 1.41
 -4 6 3 59.85 1.67
 -4 6 3 56.3 1.92
 -4 6 3 57.38 1.76
 -3 -6 3 30.1 1.04
 3 -6 -3 29.46 1.18
 3 -6 -3 29.52 1.16
 3 -6 -3 27.92 1.33
 -3 -6 3 30.49 1
 3 -6 -3 30.83 1.06
 -3 -6 3 30.43 1.42
 -3 -6 3 29.84 0.94
 3 -6 -3 31.3 1.09
 3 -6 -3 30.44 0.99
 -3 6 3 29.6 1.22
 -3 6 3 31.31 1.13
 -3 6 3 32.99 1.1
 -3 6 3 32.6 1.12
 -3 6 3 32.05 1.08
 -3 6 3 31.88 0.96
 -3 6 3 30.79 1.12
 2 -6 -3 3.8 0.35
 2 -6 -3 3.66 0.4
 2 -6 -3 4.4 0.38
 2 -6 -3 3.86 0.45
 -2 -6 3 3.52 0.38
 -2 -6 3 4.03 0.26
 -2 6 3 4.88 0.38
 2 6 -3 3.94 0.41
 -2 6 3 4.05 0.42
 -2 6 3 4.26 0.42
 -2 6 3 3.38 0.44
 1 -6 -3 18.46 0.86
 1 -6 -3 19.25 0.76
 1 -6 -3 18.26 0.77
 1 6 -3 19.19 0.87
 -1 6 3 17.09 0.76
 -1 6 3 18.66 0.85
 0 -6 3 10.2 0.62
 0 -6 3 10.16 0.53
 0 -6 -3 9.53 0.52
 0 -6 3 10.12 0.56
 0 6 3 10.2 0.58
 0 6 -3 10.47 0.62
 0 6 3 10.34 0.6
 0 6 -3 10.88 0.61
 1 -6 3 2.97 0.33
 1 -6 3 2.64 0.36
 1 -6 3 3.07 0.34
 1 6 3 3.06 0.35
 -1 6 -3 2.77 0.32
 -1 6 -3 2.31 0.35
 -1 6 -3 3.17 0.37
 2 -6 3 66.77 1.85
 2 -6 3 65.16 1.78
 2 -6 3 59.19 1.94
 -2 6 -3 66.36 1.91
 -2 6 -3 66.28 1.87
 2 6 3 65.62 2.6
 -2 6 -3 66.49 2.53
 -2 6 -3 66.44 2.09
 3 -6 3 30.65 1.2
 3 -6 3 29.59 1.05
 3 -6 3 28.1 1.15
 3 -6 3 30.41 1.09
 -3 -6 -3 30.09 1.05
 3 -6 3 29.79 0.98
 -3 -6 -3 30.28 1.03
 -3 6 -3 30.46 1.08
 -3 6 -3 30.25 1.03
 -3 6 -3 29.45 1
 3 6 3 30.22 1.14
 3 6 3 30.35 1.48
 -3 6 -3 29.82 1.31
 -3 6 -3 29.45 1.22
 -3 6 -3 30.96 1.13
 -4 -6 -3 14.84 0.7
 -4 -6 -3 14.11 0.67
 -4 -6 -3 13.14 1.68
 4 -6 3 14.65 0.67
 -4 -6 -3 14.67 0.7
 4 -6 3 15.3 0.79
 4 -6 3 15.29 0.82
 4 -6 3 14.37 0.76
 4 -6 3 15.03 0.72
 4 -6 3 15.07 0.73
 4 -6 3 15.47 0.64
 4 -6 3 14.53 0.78
 -4 6 -3 15.92 0.78
 -4 6 -3 15.93 0.68
 4 6 3 15.04 0.78
 -4 6 -3 16 0.76
 4 6 3 15.01 0.99
 -4 6 -3 15.15 0.76
 5 -6 3 9.74 0.59
 5 -6 3 11.21 0.69
 -5 -6 -3 9.03 0.52
 5 -6 3 9.24 0.65
 5 -6 3 10.39 0.64
 5 -6 3 10.61 0.59
 -5 -6 -3 9.28 1.43
 -5 -6 -3 9.88 0.56
 -5 -6 -3 9.95 0.56
 5 -6 3 10.02 0.6
 5 -6 3 10.02 0.64
 5 -6 3 10.34 0.5
 -5 -6 -3 11.04 0.78
 -5 6 -3 10.2 0.64
 -5 6 -3 9.39 0.61
 5 6 3 11.35 0.68
 5 6 3 9.46 0.82
 -5 6 -3 11.39 0.52
 -5 6 -3 10.06 0.6
 -6 -6 -3 2.13 0.3
 6 -6 3 2.01 0.37
 6 -6 3 2.1 0.35
 6 -6 3 1.55 0.27
 6 -6 3 1.47 0.32
 6 -6 3 1.6 0.33
 6 -6 3 2 0.32
 -6 -6 -3 2.67 0.43
 -6 -6 -3 1.79 0.29
 6 -6 3 1.66 0.33
 6 -6 3 1.38 0.28
 -6 -6 -3 1.61 0.28
 -6 -6 -3 1.88 0.29
 -6 6 -3 2.11 0.36
 -6 6 -3 1.78 0.19
 6 6 3 1.91 0.45
 -6 6 -3 1.03 0.28
 -6 6 -3 1.84 0.29
 6 6 3 1.54 0.3
 -7 -6 -3 3.22 0.3
 7 -6 3 3.82 0.44
 7 -6 3 3.34 0.4
 7 -6 3 3.25 0.4
 7 -6 3 3.15 0.43
 -7 -6 -3 4.1 0.38
 7 -6 3 3.86 0.38
 -7 -6 -3 3.04 0.46
 7 -6 3 3.76 0.38
 -7 -6 -3 2.58 0.91
 7 -6 3 3.65 0.31
 -7 -6 -3 3.45 0.37
 -7 -6 -3 4.01 0.37
 7 6 3 3.39 0.5
 -7 6 -3 3.45 0.29
 -7 6 -3 3.84 0.4
 7 6 3 3.37 0.39
 8 -6 3 0.43 0.21
 -8 -6 -3 0.45 0.18
 -8 -6 -3 0.19 0.16
 -8 -6 -3 0.54 0.17
 -8 -6 -3 0.12 0.15
 -8 -6 -3 0.47 0.17
 8 -6 3 0.75 0.2
 -8 -6 -3 0.25 0.1
 -8 6 -3 0.67 0.21
 -8 6 -3 0.52 0.2
 8 6 3 0.4 0.18
 8 6 3 0.32 0.2
 -9 -6 -3 5.83 0.47
 -9 -6 -3 6.22 0.36
 -9 -6 -3 5.86 0.34
 9 -6 3 6.41 0.36
 -9 -6 -3 5.5 0.34
 9 6 3 5.7 0.47
 9 6 3 5.78 0.36
 -9 6 -3 5.83 0.37
 -9 6 -3 6.55 0.35
 -8 -7 3 0.24 0.14
 -8 -7 3 0.04 0.1
 8 -7 -3 0.1 0.15
 -8 -7 3 -0.14 0.11
 8 7 -3 0.15 0.13
 -8 7 3 0.01 0.11
 8 7 -3 0.2 0.13
 8 7 -3 0.1 0.15
 -8 7 3 0.13 0.1
 -8 7 3 -0.04 0.12
 -7 -7 3 23.27 2.02
 7 -7 -3 24.33 1.01
 -7 -7 3 24.31 0.77
 7 -7 -3 24.2 0.77
 7 -7 -3 23.41 0.94
 7 -7 -3 24.7 0.85
 -7 -7 3 25.31 1.15
 -7 -7 3 23.26 0.83
 7 7 -3 25.62 0.84
 -7 7 3 24.11 0.89
 -7 7 3 25.9 0.83
 -7 7 3 25.38 0.83
 -7 7 3 24.65 0.91
 7 7 -3 24.47 0.95
 6 -7 -3 0.11 0.12
 -6 -7 3 -0.09 0.15
 -6 -7 3 0.14 0.08
 -6 -7 3 0.27 0.19
 6 -7 -3 0.31 0.17
 6 -7 -3 0.22 0.2
 6 -7 -3 0.38 0.19
 -6 -7 3 0.06 0.12
 6 -7 -3 0.13 0.22
 -6 -7 3 0.37 0.14
 6 -7 -3 0.21 0.2
 -6 7 3 0.53 0.21
 -6 7 3 0.33 0.19
 6 7 -3 0.31 0.18
 -6 7 3 0.38 0.17
 -6 7 3 0.15 0.17
 -5 -7 3 21.65 0.68
 -5 -7 3 21.87 1.13
 5 -7 -3 20.44 0.86
 5 -7 -3 21.57 0.84
 5 -7 -3 22.72 1.03
 5 -7 -3 21.3 0.78
 5 -7 -3 20.3 0.87
 -5 -7 3 22.6 0.81
 -5 -7 3 21.33 2.12
 -5 -7 3 20.91 0.84
 5 -7 -3 18.95 0.93
 -5 7 3 21.9 0.91
 5 7 -3 22.32 0.85
 -5 7 3 21.55 0.85
 -5 7 3 22.83 0.87
 -5 7 3 23.03 0.75
 4 -7 -3 3.66 0.39
 4 -7 -3 3.56 0.41
 -4 -7 3 2.92 0.28
 -4 -7 3 4.43 0.41
 -4 -7 3 3.04 0.34
 4 -7 -3 2.93 0.42
 -4 -7 3 3.22 0.29
 4 -7 -3 2.98 0.31
 -4 -7 3 3.33 0.47
 4 -7 -3 2.97 0.38
 4 -7 -3 3.32 0.37
 -4 7 3 3.14 0.38
 -4 7 3 3.75 0.42
 -4 7 3 3.25 0.24
 -4 7 3 3.36 0.4
 4 7 -3 3.86 0.4
 -4 7 3 3 0.36
 -4 7 3 3.5 0.36
 -3 -7 3 17.22 1.03
 3 -7 -3 18.49 0.78
 -3 -7 3 16.01 0.7
 3 -7 -3 16.57 0.86
 -3 -7 3 16.75 0.75
 -3 -7 3 20.7 1.93
 3 -7 -3 17.18 0.85
 3 -7 -3 16.68 0.78
 -3 -7 3 17.01 0.68
 3 -7 -3 16.68 0.73
 -3 7 3 18.38 0.77
 -3 7 3 17.14 0.63
 -3 7 3 17.07 0.76
 -3 7 3 17.67 0.79
 -3 7 3 17.52 0.81
 -3 7 3 16.96 0.78
 3 7 -3 17.27 0.86
 3 7 -3 18.18 1.11
 -2 -7 3 8.63 0.53
 -2 -7 3 9.65 0.52
 2 -7 -3 8.24 0.52
 2 -7 -3 9.52 0.64
 2 -7 -3 8.85 0.55
 -2 -7 3 9.17 0.55
 2 -7 -3 8.74 0.56
 2 7 -3 9.13 0.61
 -2 7 3 9.45 0.6
 -2 7 3 9.08 0.6
 -2 7 3 9.94 0.52
 2 7 -3 9.48 0.79
 -2 7 3 9.8 0.59
 -2 7 3 9.07 0.56
 1 -7 -3 13.19 0.59
 1 -7 -3 11.95 0.65
 -1 -7 3 12.17 0.49
 1 -7 -3 11.96 0.63
 1 -7 -3 12.5 0.72
 -1 -7 3 12.12 0.67
 1 -7 -3 12.3 0.67
 -1 -7 3 12.3 0.61
 -1 -7 3 12.48 0.65
 -1 7 3 12.7 0.68
 -1 7 3 12.6 0.66
 -1 7 3 12.38 0.66
 1 7 -3 13.76 0.91
 1 7 -3 12.54 0.69
 1 7 -3 13.63 0.69
 -1 7 3 13.17 0.64
 0 -7 3 2.37 0.36
 0 -7 -3 2.35 0.3
 0 -7 3 2.89 0.28
 0 -7 3 2.53 0.42
 0 7 3 2.99 0.36
 0 7 3 3.26 0.4
 0 7 3 2.85 0.41
 0 7 -3 2.51 0.36
 0 7 3 2.99 0.32
 0 7 3 2.71 0.36
 0 7 3 3.43 0.39
 0 7 -3 3.15 0.48
 0 7 -3 2.71 0.35
 1 7 3 2.02 0.34
 1 7 3 1.55 0.3
 -1 7 -3 1.89 0.4
 1 7 3 1.85 0.34
 -1 7 -3 1.89 0.32
 -1 7 -3 2.33 0.33
 1 7 3 1.98 0.31
 1 7 3 2.04 0.39
 -2 7 -3 -0.01 0.21
 -2 7 -3 0.08 0.14
 2 7 3 0.16 0.2
 2 7 3 0.18 0.19
 -2 7 -3 0.17 0.18
 2 7 3 0.24 0.18
 -2 7 -3 0.1 0.17
 2 7 3 0.18 0.16
 2 7 3 -0.11 0.16
 -3 -7 -3 12.55 0.52
 -3 -7 -3 14.45 1.65
 -3 -7 -3 12.13 0.65
 -3 -7 -3 12.97 0.66
 3 -7 3 12.64 0.73
 3 -7 3 13.74 0.69
 3 -7 3 12.77 0.64
 3 -7 3 13.01 0.56
 3 -7 3 12.73 0.68
 3 7 3 13.99 0.9
 -3 7 -3 12.68 0.7
 -3 7 -3 13.68 0.63
 -3 7 -3 13.25 0.71
 3 7 3 13.46 0.69
 3 7 3 12.52 0.67
 3 7 3 14.48 0.7
 -4 -7 -3 10.74 0.57
 4 -7 3 10.51 0.52
 4 -7 3 10.81 0.69
 4 -7 3 10.44 0.59
 -4 -7 -3 10.61 0.58
 -4 -7 -3 9.86 1.48
 4 -7 3 9.67 0.6
 4 -7 3 10.56 0.64
 -4 7 -3 10.98 0.54
 4 7 3 11.31 0.81
 4 7 3 10.6 0.62
 -4 7 -3 11.27 0.67
 -4 7 -3 12.35 0.67
 -4 7 -3 10.68 0.63
 4 7 3 11.47 0.63
 5 -7 3 0.78 0.29
 5 -7 3 0.68 0.21
 5 -7 3 0.6 0.24
 5 -7 3 0.78 0.26
 -5 -7 -3 0.91 0.2
 -5 -7 -3 0.37 0.24
 5 -7 3 0.98 0.25
 -5 -7 -3 0.61 0.21
 5 7 3 0.53 0.2
 5 7 3 1.37 0.28
 -5 7 -3 0.95 0.26
 5 7 3 0.72 0.25
 -5 7 -3 1.38 0.26
 -5 7 -3 0.9 0.19
 6 -7 3 1.94 0.31
 6 -7 3 2.64 0.39
 6 -7 3 3.09 0.39
 -6 -7 -3 2.85 0.37
 -6 -7 -3 3.09 0.29
 -6 -7 -3 3.1 0.87
 6 -7 3 2.88 0.31
 -6 7 -3 2.6 0.35
 -6 7 -3 2.76 0.3
 6 7 3 2.78 0.45
 6 7 3 3.14 0.36
 6 7 3 2.66 0.34
 -7 -7 -3 2.71 0.31
 -7 -7 -3 2.19 0.29
 -7 -7 -3 2.01 0.69
 7 -7 3 2.95 0.38
 -7 -7 -3 2.65 0.23
 7 -7 3 3.07 0.28
 7 7 3 2.7 0.31
 7 7 3 2.6 0.39
 7 7 3 2.81 0.32
 -7 7 -3 3.24 0.34
 -8 -7 -3 0.67 0.16
 -8 -7 -3 1.18 0.17
 8 -7 3 1.2 0.17
 8 7 3 0.92 0.16
 -8 7 -3 1.21 0.2
 -8 7 -3 0.91 0.17
 8 7 3 0.78 0.18
 8 7 3 0.69 0.14
 -6 -8 3 17.62 0.89
 6 -8 -3 17.53 0.6
 -6 -8 3 18.29 1.66
 -6 -8 3 17.11 0.64
 6 -8 -3 16.7 0.74
 -6 8 3 16.38 0.66
 -6 8 3 17.79 0.66
 -6 8 3 17.58 0.61
 6 8 -3 19.08 0.72
 6 8 -3 18.61 0.92
 -5 -8 3 0.21 0.16
 5 -8 -3 0.39 0.2
 -5 -8 3 -0.12 0.14
 5 -8 -3 0.12 0.15
 -5 -8 3 0.26 0.1
 -5 -8 3 0.56 0.18
 -5 8 3 0.17 0.1
 5 8 -3 0.4 0.17
 -5 8 3 0.18 0.16
 -5 8 3 0.26 0.18
 5 8 -3 0.07 0.16
 -4 -8 3 11.62 0.58
 -4 -8 3 12.3 1.56
 4 -8 -3 13.84 0.71
 -4 -8 3 11.78 0.87
 -4 -8 3 12.51 0.49
 4 -8 -3 12.03 0.54
 4 -8 -3 12.18 0.63
 4 8 -3 13.12 0.65
 -4 8 3 12.94 0.65
 -4 8 3 12.47 0.54
 4 8 -3 12.46 0.83
 -4 8 3 12.41 0.59
 4 8 -3 13.63 0.65
 3 -8 -3 2.17 0.37
 -3 -8 3 3.06 0.31
 3 -8 -3 2.66 0.29
 -3 -8 3 2.97 0.35
 -3 -8 3 3.02 0.29
 3 -8 -3 2.14 0.33
 3 -8 -3 3.38 0.42
 -3 8 3 3.01 0.39
 -3 8 3 3.35 0.25
 3 8 -3 2.68 0.36
 3 8 -3 3.23 0.47
 3 8 -3 2.78 0.37
 -3 8 3 3.21 0.36
 -3 8 3 3.88 0.37
 2 -8 -3 15.12 0.71
 -2 -8 3 15.36 0.55
 2 -8 -3 14.92 0.58
 -2 -8 3 13.98 0.62
 2 -8 -3 14.71 0.69
 2 -8 -3 14.17 0.73
 -2 -8 3 15.15 0.67
 -2 -8 3 14.26 0.68
 2 -8 -3 15.11 0.77
 -2 8 3 16.02 0.73
 2 8 -3 16.38 0.96
 2 8 -3 16.33 0.76
 2 8 -3 15.91 0.75
 -2 8 3 16.52 0.71
 -2 8 3 16.62 0.77
 -2 8 3 16.91 0.62
 -2 8 3 15.69 0.73
 1 -8 -3 19.12 0.76
 1 -8 -3 17.53 0.61
 -1 -8 3 16.42 0.77
 -1 -8 3 18.29 0.68
 -1 -8 3 17.56 0.73
 1 8 -3 19.1 0.81
 -1 8 3 20.2 0.86
 -1 8 3 18.24 0.73
 -1 8 3 18.89 0.84
 1 8 -3 19.19 1.05
 -1 8 3 19.47 0.8
 1 8 -3 20.33 0.85
 -1 8 3 18.8 0.79
 0 -8 3 0.66 0.23
 0 -8 -3 0.24 0.19
 0 -8 3 0.44 0.24
 0 -8 -3 0.37 0.13
 0 -8 3 0.47 0.15
 0 -8 3 0.26 0.18
 0 8 3 0.43 0.22
 0 8 -3 0.39 0.18
 0 8 3 0.65 0.23
 0 8 -3 0.72 0.24
 0 8 3 0.04 0.2
 0 8 3 0.37 0.21
 0 8 -3 0.46 0.2
 1 -8 3 1.77 0.25
 1 -8 3 1.7 0.31
 1 -8 3 1.92 0.34
 -1 -8 -3 1.65 0.25
 1 -8 3 1.52 0.35
 1 -8 3 2.05 0.32
 1 8 3 2.38 0.36
 1 8 3 1.55 0.27
 -1 8 -3 1.88 0.28
 1 8 3 2.37 0.33
 -1 8 -3 1.7 0.3
 -1 8 -3 1.92 0.32
 -1 8 -3 2 0.35
 1 8 3 2.46 0.36
 1 8 3 1.8 0.32
 1 8 3 1.76 0.27
 2 -8 3 3.08 0.4
 2 -8 3 4.01 0.43
 2 -8 3 3.55 0.51
 -2 -8 -3 3.49 0.29
 2 -8 3 3.12 0.39
 2 -8 3 4.09 0.36
 2 8 3 3.74 0.43
 2 8 3 4.47 0.41
 2 8 3 4.46 0.43
 2 8 3 3.98 0.4
 -2 8 -3 3.55 0.38
 2 8 3 3.38 0.42
 2 8 3 4.04 0.35
 -2 8 -3 3.5 0.36
 3 -8 3 1.64 0.18
 3 -8 3 1.39 0.28
 3 -8 3 1.23 0.27
 3 -8 3 1.63 0.35
 -3 -8 -3 1.74 0.29
 -3 -8 -3 1.74 0.27
 3 -8 3 1.14 0.27
 3 -8 3 1.15 0.23
 3 8 3 1.12 0.2
 3 8 3 1.45 0.27
 3 8 3 1.37 0.26
 -3 8 -3 2.36 0.34
 3 8 3 1.27 0.29
 -3 8 -3 1.17 0.23
 -3 8 -3 1.84 0.33
 3 8 3 1.42 0.33
 4 -8 3 16.12 0.78
 4 -8 3 15.27 0.7
 4 -8 3 15.94 0.65
 -4 -8 -3 15.37 0.64
 -4 -8 -3 16.16 0.68
 -4 -8 -3 15.57 1.7
 4 -8 3 15.13 0.5
 4 8 3 16.09 0.72
 -4 8 -3 16.26 0.58
 4 8 3 16.74 0.68
 -4 8 -3 16.53 0.72
 -4 8 -3 15.92 0.74
 4 8 3 16.93 0.7
 4 8 3 16.29 0.69
 4 8 3 15.54 0.87
 5 -8 3 -0.18 0.16
 -5 -8 -3 0.09 0.15
 -5 -8 -3 -0.08 0.12
 5 -8 3 0.01 0.1
 5 -8 3 0.21 0.18
 -5 -8 -3 0.04 0.11
 -5 -8 -3 0.17 0.13
 -5 8 -3 -0.13 0.15
 5 8 3 0.03 0.13
 5 8 3 -0.03 0.12
 5 8 3 -0.06 0.16
 5 8 3 -0.07 0.14
 5 8 3 0.07 0.14
 -5 8 -3 -0.16 0.15
 6 -8 3 18.63 0.78
 -6 -8 -3 19.49 0.67
 6 -8 3 20.03 0.54
 -6 -8 -3 19.76 1.7
 -6 -8 -3 20.08 0.58
 6 -8 3 20.3 0.7
 6 8 3 20.77 0.71
 6 8 3 20.86 0.93
 -6 8 -3 20.76 0.56
 6 8 3 19 0.7
 6 8 3 19.92 0.7
 -6 8 -3 20.76 0.74
 6 8 3 20.98 0.7
 -4 -9 3 1.35 0.12
 4 -9 -3 1.24 0.2
 -4 9 3 0.91 0.19
 4 9 -3 1.05 0.17
 4 9 -3 1.02 0.19
 4 9 -3 1.04 0.24
 -3 -9 3 14.6 0.49
 3 -9 -3 14.31 0.56
 -3 -9 3 13.71 1.44
 -3 9 3 14.74 0.62
 3 9 -3 14.95 0.62
 -3 9 3 14.24 0.55
 3 9 -3 15.35 0.76
 -3 9 3 15.23 0.54
 3 9 -3 14.54 0.58
 2 9 -3 0.22 0.12
 2 9 -3 0.21 0.14
 -2 9 3 0.23 0.17
 2 9 -3 0.57 0.2
 -2 9 3 0.21 0.17
 -2 9 3 0.27 0.16
 -1 -9 3 15.33 0.46
 1 -9 -3 14.79 0.55
 -1 -9 3 15.02 0.61
 -1 -9 3 14.91 0.6
 -1 9 3 14.68 0.66
 1 9 -3 14.43 0.64
 1 9 -3 15.34 0.67
 -1 9 3 15.97 0.52
 -1 9 3 16.53 0.67
 1 9 -3 15.73 0.57
 1 9 -3 14.25 0.73
 -1 9 3 15.36 0.6
 0 -9 -3 0.6 0.14
 0 -9 3 0.62 0.21
 0 -9 -3 0.63 0.24
 0 -9 3 0.68 0.15
 0 -9 3 0.52 0.18
 0 9 3 0.98 0.26
 0 9 3 0.55 0.18
 0 9 -3 0.48 0.2
 0 9 3 0.51 0.16
 0 9 -3 0.71 0.2
 0 9 3 0.52 0.19
 -1 -9 -3 11.67 0.61
 1 -9 3 12 0.5
 1 -9 3 11.68 0.61
 -1 9 -3 12.69 0.53
 1 9 3 11.85 0.58
 -1 9 -3 11.21 0.58
 1 9 3 12.49 0.53
 1 9 3 11.74 0.54
 2 -9 3 0.71 0.22
 2 -9 3 1.07 0.19
 -2 -9 -3 0.77 0.21
 -2 -9 -3 0.59 0.18
 2 -9 3 0.76 0.13
 -2 9 -3 0.6 0.2
 2 9 3 0.59 0.19
 2 9 3 0.62 0.2
 2 9 3 0.81 0.19
 -2 9 -3 0.84 0.17
 -2 9 -3 1.03 0.25
 3 -9 3 7.79 0.5
 -3 -9 -3 7.88 0.4
 -3 -9 -3 7.83 0.41
 3 -9 3 7.92 0.32
 3 -9 3 7.32 0.42
 3 -9 3 6.84 0.48
 -3 -9 -3 8.21 1.11
 3 9 3 8.51 0.43
 -3 9 -3 7.55 0.45
 3 9 3 8.44 0.43
 -3 9 -3 8.55 0.33
 -3 9 -3 8.32 0.45
 3 9 3 7.6 0.44
 4 -9 3 5.65 0.36
 4 -9 3 5.53 0.27
 -4 -9 -3 5.45 0.3
 -4 -9 -3 4.57 0.81
 4 9 3 6.7 0.36
 -4 9 -3 5.72 0.37
 -4 9 -3 5.71 0.33
 4 9 3 5.99 0.36
 4 9 3 5.6 0.35
 -11 0 4 22.15 1.03
 11 0 -4 22.36 0.69
 -11 0 4 22.11 0.8
 -11 0 4 21.97 0.82
 -11 0 4 20.91 0.78
 -11 0 4 21.9 0.66
 -10 0 4 0.08 0.2
 -10 0 4 -0.02 0.11
 -10 0 4 0.37 0.12
 -10 0 4 0.33 0.2
 -10 0 4 0 0.16
 -9 0 4 67.02 2.56
 -9 0 4 70.16 1.74
 -9 0 4 67.62 1.88
 -9 0 4 70.53 1.92
 -9 0 4 70 1.94
 -8 0 4 1.15 0.26
 -8 0 4 1 0.25
 -8 0 4 0.48 0.16
 -8 0 4 1 0.18
 -8 0 4 0.81 0.26
 -8 0 4 0.85 0.11
 7 0 -4 1.48 0.2
 7 0 -4 1.7 0.2
 6 0 -4 17.93 0.58
 6 0 -4 17.79 0.64
 5 0 -4 0.77 0.16
 5 0 -4 0.48 0.09
 -5 0 4 0.28 0.1
 -4 0 4 65.93 1.82
 4 0 -4 65.7 1.68
 4 0 -4 69.3 1.68
 -4 0 4 64.84 1.63
 -3 0 4 0.46 0.08
 -2 0 4 175.33 4.14
 -1 0 4 0.42 0.08
 0 0 -4 198.51 4.96
 0 0 4 201.95 4.69
 -1 0 -4 289.2 7.15
 -2 0 -4 189.11 4.73
 2 0 4 187.93 4.75
 3 0 4 50.15 1.41
 4 0 4 312.62 7.73
 4 0 4 301.18 7.5
 5 0 4 0.98 0.19
 5 0 4 0.64 0.16
 6 0 4 11.81 0.59
 6 0 4 11.65 0.44
 7 0 4 0.27 0.12
 -8 0 -4 6.4 0.49
 -8 0 -4 6.83 0.44
 -8 0 -4 8.24 0.64
 -8 0 -4 6.67 0.46
 8 0 4 6.27 0.53
 8 0 4 6.83 0.38
 -8 0 -4 5.39 0.45
 -8 0 -4 6.16 0.48
 -9 0 -4 9.23 0.5
 9 0 4 10.41 0.48
 -9 0 -4 9.02 0.53
 -9 0 -4 9.42 0.57
 -9 0 -4 9.71 0.56
 -9 0 -4 10.76 0.59
 -9 0 -4 10.43 0.78
 9 0 4 9.75 0.66
 -10 0 -4 0.46 0.18
 10 0 4 0.14 0.19
 -10 0 -4 0.19 0.18
 10 0 4 0.46 0.24
 -10 0 -4 0.28 0.15
 -10 0 -4 0.24 0.19
 10 0 4 0.04 0.22
 -10 0 -4 0.36 0.2
 -10 0 -4 0.07 0.17
 -11 0 -4 7.89 0.6
 -11 0 -4 8.77 0.45
 -11 0 -4 8.19 0.44
 11 0 4 9.07 0.66
 -11 0 -4 7.96 0.28
 -11 0 -4 8.68 0.44
 -11 0 -4 8.38 0.47
 11 0 4 8.15 0.48
 -11 -1 4 1.52 0.18
 -11 -1 4 1.56 0.27
 -11 -1 4 1.96 0.28
 -11 -1 4 1.84 0.27
 11 -1 -4 1.52 0.22
 -11 -1 4 1.23 0.23
 -11 1 4 1.49 0.23
 -11 1 4 1.53 0.19
 -11 1 4 1.58 0.29
 -11 1 4 2.06 0.31
 -11 1 4 2.02 0.28
 11 1 -4 1.81 0.23
 -10 -1 4 26.09 0.79
 10 -1 -4 26.69 0.82
 -10 -1 4 26.15 1.19
 -10 -1 4 25.5 0.96
 -10 -1 4 25.46 0.98
 -10 -1 4 25.6 0.95
 -10 1 4 27.3 0.99
 -10 1 4 28.42 1.02
 -10 1 4 26.67 1.26
 -10 1 4 26.34 0.98
 -10 1 4 27.96 0.87
 -9 -1 4 3.38 0.37
 -9 -1 4 3.22 0.39
 -9 -1 4 3.88 0.43
 -9 -1 4 3.39 0.4
 -9 -1 4 3.5 0.28
 -9 1 4 3.42 0.42
 -9 1 4 3.6 0.16
 -9 1 4 3.76 0.39
 -9 1 4 3.97 0.31
 -9 1 4 3.23 0.39
 -9 1 4 3.49 0.42
 -8 -1 4 -0.06 0.18
 -8 -1 4 0.01 0.11
 -8 -1 4 0.1 0.18
 8 -1 -4 -0.08 0.2
 8 -1 -4 0.17 0.15
 -8 -1 4 -0.19 0.17
 -8 -1 4 0 0.1
 -8 1 4 0.14 0.18
 -8 1 4 0.09 0.1
 -8 1 4 0.13 0.1
 -8 1 4 0.09 0.12
 -8 1 4 -0.08 0.16
 -8 1 4 -0.05 0.17
 7 -1 -4 33.23 1.16
 7 -1 -4 35.77 1.11
 7 -1 -4 35.4 1.26
 7 1 -4 32.24 1.05
 6 -1 -4 42.3 1.19
 6 -1 -4 40.5 1.35
 6 -1 -4 40.22 1.25
 6 1 -4 41.66 1.11
 6 1 -4 39.49 1.18
 -6 1 4 38.96 1.18
 5 -1 -4 34.86 1.14
 5 -1 -4 35.45 0.98
 5 -1 -4 34.62 0.98
 5 -1 -4 36.23 1.05
 -5 1 4 34.52 1.03
 5 1 -4 36.08 0.99
 4 -1 -4 14.15 0.43
 4 -1 -4 14.73 0.48
 -4 1 4 13.89 0.49
 -4 1 4 12.87 0.55
 3 -1 -4 3 0.15
 -3 1 4 2.96 0.2
 -3 1 4 2.75 0.22
 -3 1 4 3.17 0.21
 2 -1 -4 8.88 0.29
 -2 1 4 9.83 0.36
 1 -1 -4 605.61 14.98
 -1 1 4 642.78 14.8
 0 -1 -4 154.87 3.87
 0 1 4 162.83 3.84
 -1 -1 -4 24.36 0.72
 1 -1 4 24.89 0.71
 1 1 4 27.54 0.72
 -1 1 -4 26.77 0.78
 2 -1 4 51.87 1.42
 -2 -1 -4 51.4 1.4
 2 1 4 54.9 1.33
 -2 1 -4 54.05 1.49
 3 -1 4 256.15 6.34
 3 -1 4 246.43 6.19
 -3 1 -4 255.07 5.72
 -3 1 -4 255.47 6.4
 -3 1 -4 252.75 5.94
 4 -1 4 30.56 1
 4 -1 4 30.99 1
 -4 1 -4 30.53 0.89
 5 -1 4 44.4 1.38
 5 -1 4 44.09 1.32
 -5 1 -4 45.76 1.27
 6 -1 4 -0.02 0.12
 6 -1 4 0.07 0.1
 6 -1 4 0 0.12
 6 -1 4 -0.02 0.11
 6 1 4 -0.06 0.1
 7 -1 4 25.69 0.78
 7 -1 4 25.52 1.06
 7 -1 4 26.44 1.01
 7 1 4 27.51 0.82
 8 -1 4 0.86 0.18
 -8 -1 -4 1.03 0.22
 -8 -1 -4 0.96 0.26
 -8 -1 -4 0.5 0.21
 -8 -1 -4 1.16 0.23
 -8 -1 -4 0.6 0.22
 -8 -1 -4 0.65 0.22
 8 1 4 0.61 0.18
 -8 1 -4 1.41 0.28
 -8 1 -4 0.93 0.23
 -8 1 -4 0.81 0.24
 -8 1 -4 1.06 0.14
 -8 1 -4 1.21 0.28
 -8 1 -4 3.06 0.52
 -8 1 -4 1.02 0.23
 -9 -1 -4 0.46 0.18
 9 -1 4 0.46 0.23
 9 -1 4 0.88 0.18
 -9 -1 -4 0.28 0.2
 -9 -1 -4 0.49 0.18
 -9 -1 -4 0.51 0.19
 -9 -1 -4 0.31 0.19
 9 -1 4 0.1 0.19
 9 -1 4 0.34 0.26
 -9 -1 -4 0.65 0.23
 -9 1 -4 0.46 0.21
 -9 1 -4 0.35 0.2
 -9 1 -4 0.23 0.19
 -9 1 -4 0.49 0.19
 -9 1 -4 0.61 0.22
 -10 -1 -4 31.52 1.05
 -10 -1 -4 31.88 1.07
 -10 -1 -4 31.75 1.03
 -10 -1 -4 31.56 1.47
 10 -1 4 32.5 1.2
 -10 -1 -4 30.42 0.89
 -10 -1 -4 29.13 1.02
 10 -1 4 31.21 1.52
 10 -1 4 31.62 1.17
 10 1 4 31.57 1.18
 -10 1 -4 30.21 1.01
 -10 1 -4 29.79 1.04
 -10 1 -4 31.36 0.93
 10 1 4 30.74 1.52
 -10 1 -4 31.23 1.46
 -10 1 -4 30.47 1.02
 -10 1 -4 28.03 0.97
 11 -1 4 3.76 0.35
 -11 -1 -4 3.74 0.32
 11 -1 4 3.13 0.43
 -11 -1 -4 4.15 0.32
 -11 -1 -4 3.61 0.42
 11 -1 4 3.79 0.39
 -11 -1 -4 3.94 0.34
 11 1 4 3.73 0.46
 -11 1 -4 3.99 0.35
 -11 1 -4 4.06 0.32
 11 1 4 3.72 0.36
 -11 1 -4 3.86 0.22
 -11 -2 4 0.6 0.18
 11 -2 -4 0.69 0.16
 -11 -2 4 0.94 0.21
 -11 -2 4 0.96 0.14
 -11 -2 4 0.74 0.19
 -11 -2 4 0.66 0.15
 -11 2 4 0.92 0.19
 -11 2 4 0.95 0.2
 -11 2 4 0.93 0.21
 -11 2 4 0.8 0.15
 -11 2 4 0.78 0.19
 -10 -2 4 0.12 0.12
 -10 -2 4 0.1 0.1
 -10 -2 4 0.38 0.18
 -10 -2 4 0.17 0.17
 -10 -2 4 0.22 0.18
 10 -2 -4 0.07 0.13
 -10 2 4 0.12 0.13
 -10 2 4 0.09 0.2
 -10 2 4 0.35 0.18
 -10 2 4 0.27 0.14
 -10 2 4 0.08 0.17
 -9 -2 4 0.08 0.18
 -9 -2 4 0.1 0.11
 9 -2 -4 0.15 0.15
 9 -2 -4 0.13 0.19
 9 -2 -4 0.1 0.24
 -9 -2 4 0.05 0.17
 -9 -2 4 -0.02 0.18
 -9 -2 4 0.04 0.1
 -9 2 4 0.28 0.22
 -9 2 4 0.29 0.14
 -9 2 4 0.19 0.18
 -9 2 4 -0.01 0.17
 -9 2 4 0.13 0.1
 -9 2 4 0.05 0.11
 8 -2 -4 15.7 0.82
 -8 -2 4 13.45 0.67
 8 -2 -4 14.96 0.79
 -8 -2 4 14.63 0.54
 -8 -2 4 15.02 0.72
 -8 -2 4 14.86 0.8
 -8 -2 4 14.5 0.71
 8 -2 -4 15.21 0.56
 8 -2 -4 14.84 0.69
 -8 2 4 15.77 0.73
 -8 2 4 15.3 0.56
 -8 2 4 14.65 0.75
 -8 2 4 15.65 0.62
 -8 2 4 15.19 0.87
 -8 2 4 16.02 0.73
 7 -2 -4 27.18 0.96
 7 -2 -4 28.73 1.12
 7 -2 -4 26.27 1.02
 -7 2 4 26.63 0.91
 -7 2 4 28.4 1
 -7 2 4 27.38 1.01
 -7 2 4 26.69 1.05
 -7 2 4 26.99 0.84
 6 -2 -4 4.27 0.32
 6 -2 -4 4.15 0.39
 6 -2 -4 4.54 0.32
 6 -2 -4 4.42 0.3
 6 -2 -4 4.78 0.33
 -6 2 4 5 0.36
 5 -2 -4 41.7 1.19
 5 -2 -4 42.5 1.38
 5 -2 -4 43.11 1.23
 5 -2 -4 42.46 1.29
 5 -2 -4 43.02 1.17
 -5 2 4 44.24 1.28
 4 -2 -4 16.66 0.59
 4 -2 -4 16.27 0.58
 4 -2 -4 17.36 0.56
 4 -2 -4 15.16 0.64
 -4 2 4 17.51 0.63
 -4 2 4 18.04 0.64
 3 -2 -4 0.21 0.09
 3 -2 -4 0.15 0.08
 -3 2 4 0.28 0.1
 3 2 -4 0.13 0.05
 -3 2 4 0.25 0.09
 -3 2 4 0.22 0.11
 2 -2 -4 34.53 0.99
 2 -2 -4 34.66 0.95
 -2 2 4 34.73 0.95
 2 2 -4 34.37 0.93
 -2 2 4 34.33 1.05
 -2 2 4 36.36 1.01
 1 -2 -4 17.07 0.53
 1 -2 -4 17.07 0.56
 -1 2 4 17.15 0.53
 -1 2 4 17.88 0.58
 0 -2 -4 19.78 0.62
 0 -2 -4 19.52 0.59
 0 2 4 21.15 0.65
 1 -2 4 96.06 2.53
 -1 -2 -4 101.67 2.55
 -1 -2 -4 95.35 2.46
 1 2 4 109.86 2.58
 -1 2 -4 101.44 2.48
 -2 -2 -4 23.63 0.73
 2 -2 4 22.95 0.75
 2 -2 4 22.09 0.77
 2 2 4 25.08 0.7
 -2 2 -4 24.63 0.74
 -2 2 -4 24.53 0.8
 3 -2 4 2.05 0.21
 3 -2 4 2.2 0.22
 -3 2 -4 2.22 0.19
 -3 2 -4 1.75 0.18
 4 -2 4 6.49 0.39
 4 -2 4 5.99 0.38
 4 -2 4 6.52 0.38
 4 -2 4 6.64 0.34
 -4 2 -4 6.96 0.37
 5 -2 4 3.74 0.32
 5 -2 4 3.34 0.31
 5 -2 4 4.42 0.24
 5 -2 4 3.64 0.33
 5 2 4 3.28 0.23
 -5 2 -4 3.45 0.3
 6 -2 4 0.13 0.15
 6 -2 4 0.12 0.09
 6 -2 4 -0.03 0.13
 6 -2 4 0.1 0.14
 6 2 4 0.12 0.11
 -6 2 -4 0.11 0.11
 -7 -2 -4 2.49 0.32
 -7 -2 -4 2.45 0.3
 7 -2 4 2.69 0.38
 7 -2 4 2.41 0.24
 7 -2 4 1.83 0.31
 -7 2 -4 2.7 0.36
 -7 2 -4 2.61 0.29
 8 -2 4 17.25 0.85
 8 -2 4 16.28 0.61
 -8 -2 -4 17.9 1.02
 -8 -2 -4 17.19 0.69
 -8 -2 -4 16.87 0.74
 8 -2 4 17.36 0.85
 -8 -2 -4 17.19 0.73
 -8 -2 -4 17.45 0.76
 -8 -2 -4 17.16 0.78
 8 -2 4 17.62 1.11
 -8 2 -4 17.69 0.81
 -8 2 -4 19.1 0.77
 -8 2 -4 17.14 0.54
 9 -2 4 5.25 0.34
 9 -2 4 5.25 0.47
 -9 -2 -4 4.7 0.56
 -9 -2 -4 5.64 0.43
 9 -2 4 5.33 0.5
 9 -2 4 5.5 0.64
 -9 -2 -4 5.01 0.36
 9 -2 4 5.1 0.5
 -9 -2 -4 5.24 0.45
 -9 -2 -4 5.43 0.42
 -9 -2 -4 5.23 0.43
 -9 2 -4 5.71 0.43
 -9 2 -4 5.96 0.49
 -10 -2 -4 2.97 0.34
 10 -2 4 2.82 0.35
 -10 -2 -4 2.85 0.44
 10 -2 4 2.61 0.46
 -10 -2 -4 2.83 0.31
 10 -2 4 3.06 0.26
 -10 -2 -4 2.73 0.32
 -10 -2 -4 2.75 0.24
 10 -2 4 2.45 0.4
 -10 2 -4 2.86 0.34
 -10 2 -4 3.32 0.32
 -10 2 -4 2.83 0.35
 10 2 4 2.65 0.39
 10 2 4 2.67 0.49
 11 -2 4 2.51 0.35
 11 -2 4 2.14 0.27
 11 -2 4 2.2 0.35
 -11 -2 -4 2.13 0.26
 -11 -2 -4 2.3 0.27
 -11 -2 -4 2.58 0.26
 -11 -2 -4 2.44 0.34
 -11 2 -4 2.43 0.19
 11 2 4 2.24 0.37
 -11 2 -4 2.44 0.28
 11 2 4 2.19 0.29
 -11 2 -4 2.25 0.27
 -11 -3 4 -0.05 0.07
 11 -3 -4 0.16 0.13
 -11 -3 4 0.14 0.12
 -11 -3 4 0.1 0.06
 -11 -3 4 0.22 0.14
 11 -3 -4 -0.04 0.14
 -11 3 4 0.1 0.11
 -11 3 4 0.22 0.14
 -11 3 4 0.1 0.12
 -11 3 4 -0.06 0.1
 -11 3 4 0.06 0.09
 10 -3 -4 1.85 0.36
 -10 -3 4 1.43 0.24
 10 -3 -4 1.68 0.22
 -10 -3 4 1.77 0.3
 -10 -3 4 2.07 0.2
 -10 -3 4 2.06 0.3
 -10 3 4 2.1 0.33
 -10 3 4 1.95 0.36
 -10 3 4 2.05 0.29
 -10 3 4 1.84 0.26
 -10 3 4 2.49 0.34
 -10 3 4 1.23 0.24
 -9 -3 4 0.8 0.2
 -9 -3 4 0.95 0.25
 -9 -3 4 0.9 0.17
 9 -3 -4 0.88 0.3
 -9 -3 4 0.58 0.23
 -9 -3 4 0.79 0.22
 9 -3 -4 1.05 0.32
 9 -3 -4 0.92 0.24
 9 -3 -4 1.05 0.21
 -9 3 4 0.61 0.2
 -9 3 4 0.8 0.25
 -9 3 4 0.62 0.14
 -9 3 4 0.73 0.22
 -9 3 4 0.51 0.21
 -9 3 4 0.67 0.18
 -8 -3 4 4.94 0.45
 8 -3 -4 4.7 0.42
 -8 -3 4 4.44 0.41
 8 -3 -4 5.03 0.32
 -8 -3 4 4.71 0.42
 8 -3 -4 5.19 0.48
 8 -3 -4 4.67 0.49
 8 -3 -4 5.7 0.44
 -8 -3 4 4.6 0.31
 -8 -3 4 5.04 0.45
 -8 3 4 5.09 0.43
 -8 3 4 4.73 0.42
 -8 3 4 4.86 0.33
 -8 3 4 5.07 0.54
 -8 3 4 4.67 0.46
 -8 3 4 5.29 0.38
 -8 3 4 4.92 0.45
 7 -3 -4 2.7 0.34
 7 -3 -4 2.73 0.31
 -7 -3 4 1.68 0.29
 -7 -3 4 2.07 0.33
 -7 -3 4 2.38 0.23
 7 -3 -4 2.12 0.29
 -7 -3 4 2.97 0.36
 -7 -3 4 1.97 0.32
 7 -3 -4 2.46 0.25
 7 -3 -4 2.25 0.35
 7 -3 -4 2.53 0.33
 -7 3 4 2.6 0.3
 -7 3 4 2.24 0.31
 -7 3 4 2.72 0.34
 -7 3 4 2.78 0.4
 -7 3 4 2 0.32
 -7 3 4 2.23 0.32
 -7 3 4 2.4 0.28
 -7 3 4 1.96 0.36
 6 -3 -4 0.03 0.15
 6 -3 -4 -0.08 0.11
 6 -3 -4 0.13 0.12
 6 -3 -4 0.11 0.12
 6 -3 -4 -0.07 0.16
 6 -3 -4 -0.04 0.13
 6 -3 -4 -0.02 0.12
 -6 3 4 0.19 0.18
 -6 3 4 0.04 0.12
 5 -3 -4 1.49 0.23
 5 -3 -4 1.23 0.19
 5 -3 -4 1.13 0.21
 5 -3 -4 1.58 0.22
 5 -3 -4 1.09 0.23
 5 -3 -4 1.28 0.18
 -5 3 4 1.1 0.22
 -5 3 4 1.21 0.22
 4 -3 -4 36.56 1.1
 4 -3 -4 38.8 1.21
 4 -3 -4 38.46 1.14
 4 -3 -4 37.06 1.25
 4 -3 -4 37.23 1.08
 -4 3 4 39.78 1.23
 -4 3 4 39.52 1.19
 3 -3 -4 1.26 0.18
 3 -3 -4 0.61 0.16
 3 -3 -4 1.1 0.16
 3 -3 -4 0.73 0.15
 -3 3 4 1.12 0.18
 -3 3 4 0.97 0.16
 2 -3 -4 19.03 0.66
 2 -3 -4 16.47 0.59
 2 -3 -4 18.29 0.61
 -2 3 4 18.71 0.68
 -2 3 4 18.15 0.62
 -2 3 4 18.67 0.7
 1 -3 -4 5.96 0.32
 1 -3 -4 6.02 0.33
 1 -3 -4 6.64 0.31
 -1 3 4 5.44 0.31
 -1 3 4 5.47 0.28
 1 3 -4 5.63 0.27
 -1 3 4 6.12 0.33
 0 -3 -4 58.43 1.56
 0 -3 -4 55.73 1.49
 0 -3 4 50.07 1.51
 0 3 4 58.48 1.47
 0 3 4 61.22 1.61
 0 3 -4 58.79 1.51
 1 -3 4 25.38 0.87
 1 -3 4 27.97 0.81
 1 3 4 30.21 0.9
 -1 3 -4 28.57 0.87
 2 -3 4 0.29 0.12
 2 -3 4 0.24 0.12
 2 3 4 0.36 0.11
 -2 3 -4 0.36 0.12
 -2 3 -4 0.4 0.14
 3 -3 4 22.35 0.73
 3 -3 4 21.39 0.7
 3 -3 4 21.49 0.78
 3 -3 4 20.19 0.81
 -3 3 -4 22.82 0.78
 -3 3 -4 22.64 0.79
 4 -3 4 74.57 1.85
 4 -3 4 73.72 2.05
 4 -3 4 73.5 1.65
 4 -3 4 73.75 1.89
 4 -3 4 74.58 2.17
 -4 3 -4 78.84 2.16
 -4 3 -4 82.59 2.13
 5 -3 4 -0.01 0.09
 5 -3 4 0.2 0.13
 5 -3 4 0 0.12
 5 -3 4 0.11 0.15
 5 -3 4 0.05 0.12
 -5 3 -4 0.24 0.14
 6 -3 4 -0.09 0.13
 6 -3 4 0.08 0.13
 6 -3 4 -0.05 0.1
 6 -3 4 0.14 0.14
 -6 3 -4 0.12 0.15
 -7 -3 -4 1.76 0.4
 7 -3 4 1.65 0.32
 -7 -3 -4 1.56 0.28
 -7 -3 -4 1.4 0.26
 -7 -3 -4 1.59 0.25
 -7 -3 -4 1.51 0.3
 7 -3 4 1.69 0.23
 7 -3 4 1.7 0.34
 7 -3 4 1.39 0.32
 7 -3 4 1.3 0.28
 -7 -3 -4 1.05 0.27
 -7 3 -4 1.66 0.25
 -7 3 -4 1.91 0.31
 -7 3 -4 1.81 0.28
 -7 3 -4 1.68 0.33
 -8 -3 -4 10.14 0.58
 8 -3 4 9.38 0.78
 8 -3 4 9.56 0.44
 -8 -3 -4 8.48 0.53
 8 -3 4 10.49 0.65
 8 -3 4 9.32 0.67
 -8 -3 -4 9.96 0.55
 8 -3 4 8.73 0.59
 -8 -3 -4 9.73 0.49
 -8 -3 -4 9.92 0.76
 -8 3 -4 9.44 0.6
 -8 3 -4 9.99 0.56
 -8 3 -4 9.17 0.39
 9 -3 4 0.56 0.25
 -9 -3 -4 0.71 0.17
 9 -3 4 0.66 0.26
 -9 -3 -4 0.29 0.18
 9 -3 4 0.5 0.19
 -9 -3 -4 0.91 0.22
 9 -3 4 0.83 0.17
 9 -3 4 0.8 0.27
 -9 -3 -4 0.67 0.21
 -9 -3 -4 0.38 0.18
 9 3 4 0.61 0.26
 -9 3 -4 0.79 0.22
 -9 3 -4 0.96 0.25
 9 3 4 0.63 0.25
 -10 -3 -4 0.37 0.16
 10 -3 4 0.25 0.19
 10 -3 4 0.44 0.16
 -10 -3 -4 0.5 0.19
 -10 -3 -4 0.3 0.16
 10 -3 4 0.3 0.18
 -10 -3 -4 0.4 0.19
 -10 -3 -4 0.33 0.1
 10 3 4 0.35 0.19
 -10 3 -4 0.04 0.16
 -10 3 -4 0.34 0.18
 10 3 4 0.22 0.2
 -10 3 -4 0.25 0.16
 -11 -3 -4 7.93 0.38
 11 -3 4 7.35 0.37
 11 -3 4 7.58 0.48
 -11 -3 -4 8.04 0.39
 -11 -3 -4 8.09 0.38
 -11 -3 -4 8.01 0.52
 11 -3 4 7.44 0.45
 -11 3 -4 6.92 0.38
 -11 3 -4 7.43 0.27
 11 3 4 8.09 0.42
 11 3 4 7.93 0.55
 -10 -4 4 4.48 0.24
 10 -4 -4 4.66 0.38
 -10 -4 4 4.56 0.35
 10 -4 -4 4.62 0.5
 10 -4 -4 4.19 0.27
 -10 -4 4 4.07 0.39
 -10 -4 4 4.34 0.36
 -10 4 4 4.95 0.37
 -10 4 4 4.05 0.43
 -10 4 4 4.38 0.36
 -10 4 4 4.34 0.36
 -10 4 4 4.44 0.32
 -10 4 4 4.06 0.36
 -9 -4 4 7.02 0.53
 -9 -4 4 6.85 0.47
 9 -4 -4 6.05 0.66
 9 -4 -4 7.04 0.36
 -9 -4 4 6.59 0.47
 9 -4 -4 6.61 0.45
 -9 -4 4 6.61 0.35
 9 -4 -4 6.83 0.51
 9 -4 -4 7 0.56
 -9 4 4 6.72 0.5
 -9 4 4 6.65 0.45
 -9 4 4 7.01 0.35
 -9 4 4 6.81 0.42
 -9 4 4 6.23 0.46
 -9 4 4 7.04 0.6
 8 -4 -4 18.82 0.89
 -8 -4 4 17.64 0.64
 -8 -4 4 18.71 0.81
 8 -4 -4 18.15 0.64
 -8 -4 4 19.03 0.97
 -8 -4 4 19.59 0.79
 8 -4 -4 18.59 0.79
 -8 4 4 20.22 1.11
 -8 4 4 19.8 0.8
 -8 4 4 17.21 0.84
 -8 4 4 19.85 0.71
 -8 4 4 20.24 0.84
 -8 4 4 19.18 0.8
 -8 4 4 21.14 0.88
 -8 4 4 19.73 0.78
 7 -4 -4 22.5 0.87
 -7 -4 4 20.79 1.04
 7 -4 -4 22.55 1.03
 7 -4 -4 22.73 0.9
 -7 -4 4 21.52 0.72
 7 -4 -4 20.02 0.9
 7 -4 -4 21.24 0.96
 -7 -4 4 22.13 0.87
 7 -4 -4 21.84 0.99
 7 -4 -4 21.83 0.7
 7 -4 -4 22.31 0.87
 -7 -4 4 19.97 0.83
 -7 -4 4 21.89 0.88
 -7 4 4 24.19 1.27
 -7 4 4 23.08 0.91
 -7 4 4 22.53 0.88
 -7 4 4 23.11 0.9
 -7 4 4 21.4 0.92
 -7 4 4 22.07 0.84
 -7 4 4 21.75 0.79
 -7 4 4 21.93 0.93
 -6 -4 4 22.15 0.87
 6 -4 -4 24.42 0.99
 -6 -4 4 22.91 0.89
 6 -4 -4 24.16 1.04
 6 -4 -4 23.61 0.88
 6 -4 -4 24.59 0.73
 6 -4 -4 22.61 0.92
 -6 -4 4 21.64 0.86
 -6 -4 4 22.58 0.63
 6 -4 -4 23.38 0.87
 -6 -4 4 22.66 0.74
 6 -4 -4 21.26 0.97
 6 -4 -4 24.44 0.92
 -6 -4 4 22.77 1.07
 -6 4 4 22.76 0.93
 -6 4 4 23.03 0.6
 -6 4 4 25.51 0.94
 -6 4 4 24.18 0.93
 -6 4 4 23.56 0.91
 -6 4 4 25.39 0.97
 -6 4 4 23.94 0.99
 -6 4 4 23.58 0.84
 5 -4 -4 13.81 0.72
 5 -4 -4 12.6 0.67
 5 -4 -4 13.9 0.69
 5 -4 -4 13.68 0.61
 5 -4 -4 13.5 0.62
 5 -4 -4 13.94 0.5
 5 -4 -4 14.41 0.64
 5 -4 -4 13 0.6
 -5 4 4 14.19 0.67
 -5 4 4 14.81 0.7
 4 -4 -4 41.83 1.41
 4 -4 -4 40.82 1.37
 4 -4 -4 41.24 1.26
 4 -4 -4 40.75 1.21
 4 -4 -4 43.25 1.32
 4 -4 -4 41.03 1.05
 -4 4 4 43.09 1.34
 -4 4 4 45.49 1.43
 3 -4 -4 0.18 0.1
 3 -4 -4 0.32 0.14
 3 -4 -4 0.16 0.13
 3 -4 -4 0.22 0.12
 3 -4 -4 0.18 0.12
 3 -4 -4 0.19 0.14
 -3 4 4 0.31 0.13
 -3 4 4 0.03 0.12
 3 4 -4 0.28 0.14
 2 -4 -4 1.57 0.21
 2 -4 -4 2.24 0.25
 2 -4 -4 1.77 0.23
 2 -4 -4 2.16 0.22
 2 -4 -4 1.93 0.22
 -2 4 4 1.95 0.24
 2 4 -4 2.1 0.24
 -2 4 4 1.93 0.21
 1 -4 -4 0.96 0.17
 1 -4 -4 1.25 0.18
 1 -4 -4 0.99 0.17
 1 -4 -4 1 0.18
 1 -4 -4 0.79 0.17
 -1 -4 4 0.9 0.17
 -1 4 4 1.06 0.16
 1 4 -4 1.28 0.2
 -1 4 4 1.3 0.2
 1 4 -4 1.22 0.16
 0 -4 4 0.76 0.15
 0 -4 -4 0.68 0.15
 0 -4 4 0.6 0.15
 0 -4 4 0.48 0.14
 0 4 -4 0.71 0.18
 0 4 -4 0.92 0.16
 0 4 4 0.73 0.17
 0 4 4 0.83 0.15
 1 -4 4 7.18 0.38
 1 -4 4 6.68 0.37
 1 -4 4 7.13 0.4
 1 4 4 8.57 0.42
 -1 4 -4 7.13 0.43
 -1 4 -4 8.24 0.41
 2 -4 4 4 0.32
 2 -4 4 3.79 0.29
 2 -4 4 4.28 0.31
 2 -4 4 4.26 0.34
 2 4 4 4.68 0.3
 -2 4 -4 4.68 0.32
 -2 4 -4 5.06 0.36
 3 -4 4 8.17 0.43
 3 -4 4 8.39 0.5
 3 -4 4 8.35 0.47
 3 -4 4 8.66 0.45
 -3 4 -4 10.27 0.51
 -3 4 -4 9.7 0.53
 4 -4 4 0.5 0.2
 4 -4 4 0.59 0.13
 4 -4 4 0.45 0.17
 4 -4 4 0.56 0.17
 4 -4 4 0.57 0.19
 4 -4 4 0.42 0.18
 -4 4 -4 0.84 0.23
 -4 4 -4 0.97 0.22
 5 -4 4 43.56 1.46
 5 -4 4 44.18 1.47
 5 -4 4 43.83 1.54
 5 -4 4 44.74 1.12
 5 -4 4 42.49 1.34
 5 -4 4 44.5 1.32
 -5 4 -4 45.8 1.46
 -6 -4 -4 2.88 0.38
 6 -4 4 3.74 0.43
 6 -4 4 3.81 0.41
 -6 -4 -4 3.49 0.34
 6 -4 4 3.18 0.38
 -6 -4 -4 3.66 0.38
 -6 -4 -4 3.92 0.39
 6 -4 4 3.67 0.39
 -6 -4 -4 3.99 0.47
 6 -4 4 3.43 0.36
 6 -4 4 3.62 0.35
 6 -4 4 3.86 0.28
 6 -4 4 3.77 0.5
 -6 4 -4 3.78 0.4
 -6 4 -4 3.48 0.38
 -6 4 -4 3.31 0.38
 -6 4 -4 3.52 0.3
 -7 -4 -4 20.7 0.83
 -7 -4 -4 21.25 0.77
 7 -4 4 20.22 1.14
 7 -4 4 22.2 0.99
 7 -4 4 20.87 0.87
 -7 -4 -4 20.96 1.15
 7 -4 4 21.9 0.69
 -7 -4 -4 21.73 0.87
 7 -4 4 19.73 0.98
 -7 -4 -4 21.5 0.85
 -7 4 -4 19.9 0.76
 -7 4 -4 21.68 0.91
 -7 4 -4 22.91 0.93
 8 -4 4 1.16 0.28
 -8 -4 -4 1.33 0.26
 8 -4 4 0.94 0.25
 -8 -4 -4 1.5 0.28
 -8 -4 -4 1.05 0.27
 -8 -4 -4 1.12 0.2
 8 -4 4 1.23 0.2
 -8 -4 -4 1.05 0.24
 8 -4 4 1.1 0.3
 8 -4 4 0.76 0.21
 8 4 4 0.82 0.28
 8 4 4 0.89 0.32
 -8 4 -4 1.32 0.21
 -8 4 -4 1.06 0.26
 -8 4 -4 0.97 0.27
 -8 4 -4 1.13 0.26
 9 -4 4 12.74 0.69
 -9 -4 -4 12.05 0.82
 9 -4 4 12.81 0.79
 -9 -4 -4 12.37 0.62
 9 -4 4 12.17 0.71
 9 -4 4 12.02 0.6
 -9 -4 -4 12.56 0.61
 -9 -4 -4 12.54 0.48
 -9 -4 -4 13.3 0.6
 9 4 4 11.76 0.85
 -9 4 -4 13.41 0.61
 9 4 4 12.72 0.68
 -9 4 -4 11.58 0.63
 -10 -4 -4 9.6 0.46
 10 -4 4 9.67 0.45
 -10 -4 -4 9.91 0.48
 -10 -4 -4 9.61 0.64
 10 -4 4 8.82 0.54
 10 -4 4 9.28 0.57
 -10 -4 -4 10.09 0.46
 10 4 4 10.35 0.69
 10 4 4 10.03 0.53
 -10 4 -4 9.93 0.5
 -10 4 -4 10.24 0.46
 -10 4 -4 10.09 0.51
 -10 -5 4 11.06 0.47
 10 -5 -4 10.9 0.62
 -10 -5 4 10.33 0.57
 10 -5 -4 10.9 0.49
 -10 -5 4 11.22 0.45
 -10 -5 4 10.9 0.34
 -10 5 4 10.5 0.48
 -10 5 4 11.52 0.46
 -10 5 4 10.88 0.45
 -10 5 4 10.57 0.46
 -10 5 4 10.57 0.45
 -9 -5 4 35.18 1.08
 9 -5 -4 33.49 1.13
 9 -5 -4 31.98 0.89
 9 -5 -4 33.9 1.49
 -9 -5 4 32.63 1.4
 -9 -5 4 34.2 1.03
 -9 -5 4 33.92 0.91
 -9 5 4 32.77 1.02
 -9 5 4 33.87 0.89
 -9 5 4 32.55 1.07
 -9 5 4 34.33 1.04
 -9 5 4 34 1.03
 -8 -5 4 10.26 0.68
 -8 -5 4 11.17 0.47
 8 -5 -4 10.46 0.45
 8 -5 -4 10.06 0.64
 8 -5 -4 10.11 0.77
 8 -5 -4 10.53 0.58
 -8 -5 4 11.03 0.6
 8 -5 -4 11.11 0.67
 8 -5 -4 10.55 0.56
 -8 -5 4 10.4 0.56
 -8 5 4 11.66 0.62
 -8 5 4 10.69 0.57
 -8 5 4 10.41 0.58
 -8 5 4 10.84 0.51
 -8 5 4 12.32 0.79
 -8 5 4 11.28 0.59
 -8 5 4 10.37 0.55
 7 -5 -4 7.08 0.7
 -7 -5 4 6.21 0.47
 7 -5 -4 5.64 0.52
 -7 -5 4 6.63 0.55
 7 -5 -4 7.22 0.56
 -7 -5 4 6.2 0.38
 7 -5 -4 6.67 0.45
 7 -5 -4 6.48 0.58
 -7 -5 4 8.04 0.53
 7 -5 -4 6.83 0.5
 7 -5 -4 6.82 0.5
 -7 -5 4 6.67 1.3
 7 -5 -4 6.5 0.36
 -7 5 4 6.97 0.45
 -7 5 4 6.48 0.54
 -7 5 4 7.56 0.55
 -7 5 4 6.83 0.5
 -7 5 4 7.8 0.51
 -7 5 4 6.89 0.49
 6 -5 -4 3.72 0.44
 6 -5 -4 4.26 0.41
 6 -5 -4 3.83 0.38
 -6 -5 4 4.1 1.22
 -6 -5 4 3.21 0.29
 -6 -5 4 3.3 0.41
 6 -5 -4 3.98 0.44
 -6 -5 4 3.82 0.39
 6 -5 -4 3.24 0.73
 6 -5 -4 3.35 0.34
 6 -5 -4 3.18 0.41
 6 -5 -4 3.8 0.28
 -6 -5 4 3.5 0.23
 -6 -5 4 2.96 0.38
 -6 5 4 3.46 0.38
 -6 5 4 3.29 0.37
 -6 5 4 3.08 0.34
 -6 5 4 3.72 0.42
 -6 5 4 3.72 0.23
 -6 5 4 3.56 0.39
 -6 5 4 3.21 0.36
 5 -5 -4 25.75 0.94
 5 -5 -4 25.58 1.05
 -5 -5 4 24.71 1.17
 5 -5 -4 25.7 1.09
 5 -5 -4 24.81 0.92
 5 -5 -4 25.16 0.76
 -5 -5 4 24.73 0.9
 5 -5 -4 25.14 0.97
 -5 -5 4 25.83 0.96
 -5 -5 4 25.23 0.83
 -5 -5 4 24.95 0.74
 5 -5 -4 26.39 1.05
 -5 -5 4 25.08 0.66
 -5 5 4 27.18 1.1
 -5 5 4 25.59 1.01
 -5 5 4 26.22 1.05
 -5 5 4 25.5 0.96
 -5 5 4 26.92 1.02
 -5 5 4 27.26 0.99
 -5 5 4 26.53 0.84
 -5 5 4 27.67 1
 4 -5 -4 1.22 0.24
 4 -5 -4 1.25 0.24
 4 -5 -4 1.17 0.25
 4 -5 -4 1.2 0.22
 4 -5 -4 1.31 0.19
 4 -5 -4 1.71 0.3
 -4 5 4 1.57 0.25
 -4 5 4 1.53 0.29
 -4 5 4 1.45 0.29
 3 -5 -4 4 0.25
 3 -5 -4 4.17 0.38
 3 -5 -4 4.62 0.36
 3 -5 -4 4 0.32
 3 -5 -4 4.33 0.37
 3 -5 -4 4.33 0.39
 3 5 -4 4.61 0.38
 -3 5 4 4.52 0.39
 -3 5 4 4.68 0.37
 2 -5 -4 3.44 0.23
 2 -5 -4 3.34 0.31
 2 -5 -4 3.35 0.33
 2 -5 -4 3.24 0.29
 2 -5 -4 3.33 0.35
 2 -5 -4 3.83 0.32
 -2 5 4 2.86 0.32
 2 5 -4 3.42 0.32
 -2 5 4 3.73 0.31
 -1 -5 4 1.96 0.25
 1 -5 -4 1.99 0.18
 1 -5 -4 2 0.24
 -1 -5 4 2.06 0.25
 1 -5 -4 2.04 0.25
 -1 5 4 1.92 0.22
 -1 5 4 1.97 0.26
 1 5 -4 1.94 0.25
 0 -5 -4 11.59 0.51
 0 -5 4 11.43 0.55
 0 -5 -4 12.05 0.54
 0 -5 4 11.83 0.53
 0 5 4 13.33 0.63
 0 5 -4 13.17 0.56
 0 5 -4 12.16 0.62
 1 -5 4 19.51 0.74
 1 -5 4 18.49 0.78
 1 -5 4 17.53 0.69
 -1 5 -4 20.96 0.77
 -1 5 -4 19.42 0.83
 1 5 4 19.53 0.79
 2 -5 4 38.68 1.21
 2 -5 4 37.15 1.16
 2 -5 4 37.35 1.3
 2 -5 4 38.79 1.32
 2 5 4 41.72 1.33
 -2 5 -4 41.67 1.41
 -2 5 -4 42.35 1.31
 3 -5 4 24.23 1.01
 3 -5 4 27.1 1
 3 -5 4 24.59 0.92
 3 -5 4 25.3 0.91
 3 -5 4 26.03 1.05
 -3 5 -4 27.3 1
 -3 5 -4 26.64 1.07
 4 -5 4 100.66 2.93
 4 -5 4 99.67 2.6
 4 -5 4 101.31 2.76
 4 -5 4 100.34 2.53
 4 -5 4 96.24 2.78
 -4 5 -4 100.56 2.65
 -4 5 -4 108.53 2.83
 -4 5 -4 107.24 2.96
 5 -5 4 12.69 0.72
 5 -5 4 12.87 0.76
 -5 -5 -4 12.26 1.54
 5 -5 4 12.51 0.78
 -5 -5 -4 15.24 0.87
 5 -5 4 12.9 0.72
 -5 -5 -4 13.07 0.62
 5 -5 4 12.69 0.64
 -5 -5 -4 12.53 0.63
 5 -5 4 11.78 0.64
 5 -5 4 11.48 0.59
 -5 -5 -4 13.53 0.64
 -5 5 -4 12.92 0.69
 5 5 4 12.95 0.76
 -5 5 -4 13.57 0.61
 -5 5 -4 13.62 0.7
 -5 5 -4 12.98 0.7
 -6 -5 -4 9.76 1.48
 6 -5 4 10.49 0.56
 -6 -5 -4 10.42 0.61
 6 -5 4 10.21 0.72
 6 -5 4 10.63 0.7
 -6 -5 -4 11 0.61
 6 -5 4 9.74 0.66
 -6 -5 -4 9.26 0.55
 -6 -5 -4 10.31 0.54
 6 -5 4 10.64 0.62
 6 -5 4 11.59 0.61
 -6 -5 -4 10.31 0.77
 6 -5 4 11.05 0.68
 -6 5 -4 10.55 0.64
 6 5 4 11.78 0.71
 -6 5 -4 11.56 0.61
 -6 5 -4 10.23 0.46
 6 5 4 10.9 0.87
 -6 5 -4 11.59 0.65
 7 -5 4 4.91 0.5
 -7 -5 -4 4.85 0.42
 7 -5 4 4.9 0.49
 7 -5 4 4.64 0.39
 7 -5 4 4.64 0.49
 -7 -5 -4 4.85 0.55
 7 -5 4 5.04 0.51
 -7 -5 -4 4.77 1.06
 7 -5 4 4.18 0.42
 -7 -5 -4 4.5 0.44
 -7 -5 -4 4.81 0.38
 7 -5 4 4.12 0.49
 -7 -5 -4 5.01 0.41
 -7 5 -4 4.38 0.46
 7 5 4 4.79 0.5
 -7 5 -4 4.82 0.37
 7 5 4 4.65 0.6
 -7 5 -4 5.41 0.48
 8 -5 4 8 0.46
 -8 -5 -4 8.63 0.44
 8 -5 4 8.14 0.57
 -8 -5 -4 8.51 0.5
 -8 -5 -4 7.91 0.67
 8 -5 4 7.52 0.58
 -8 -5 -4 7.9 0.49
 -8 -5 -4 7.5 0.5
 8 -5 4 8.05 0.59
 8 5 4 7.92 0.71
 -8 5 -4 8.65 0.54
 -8 5 -4 7.84 0.54
 8 5 4 8.25 0.57
 -8 5 -4 8.25 0.3
 9 -5 4 1.92 0.24
 -9 -5 -4 1.96 0.29
 -9 -5 -4 3.11 0.31
 9 -5 4 2.29 0.31
 9 -5 4 2.28 0.34
 9 -5 4 2.39 0.34
 -9 -5 -4 2.25 0.39
 -9 -5 -4 2.49 0.28
 -9 -5 -4 2.46 0.19
 9 5 4 2.42 0.33
 -9 5 -4 2.52 0.33
 9 5 4 2.89 0.42
 -9 5 -4 2.13 0.3
 -10 -5 -4 11.03 0.43
 10 -5 4 10.3 0.46
 -10 -5 -4 10.39 0.43
 -10 5 -4 11.06 0.46
 -10 5 -4 10.29 0.4
 -10 5 -4 10.4 0.46
 10 5 4 10.56 0.47
 10 5 4 10.46 0.6
 -9 -6 4 11.5 0.47
 9 -6 -4 12.54 0.5
 -9 -6 4 12.23 0.41
 9 -6 -4 11.79 0.63
 -9 -6 4 12.62 0.66
 -9 -6 4 11.33 0.5
 -9 6 4 12.3 0.38
 -9 6 4 12.35 0.48
 -9 6 4 12.62 0.53
 -9 6 4 12.23 0.49
 -8 -6 4 9.58 1.27
 -8 -6 4 12.04 0.56
 8 -6 -4 11.43 0.63
 8 -6 -4 11.4 0.71
 -8 -6 4 11.14 0.46
 8 -6 -4 11.03 0.54
 -8 -6 4 11.08 0.68
 -8 -6 4 10.99 0.53
 -8 6 4 10.95 0.56
 -8 6 4 11.17 0.53
 -8 6 4 11.08 0.49
 -8 6 4 11.78 0.54
 -7 -6 4 -0.13 0.15
 -7 -6 4 0 0.1
 7 -6 -4 -0.08 0.2
 7 -6 -4 0.22 0.19
 -7 -6 4 0.37 0.18
 7 -6 -4 0.13 0.13
 7 -6 -4 0.07 0.19
 7 -6 -4 0.19 0.18
 -7 -6 4 0.02 0.11
 -7 -6 4 -0.21 0.14
 7 -6 -4 0.08 0.14
 7 -6 -4 0.09 0.19
 -7 6 4 0.01 0.16
 -7 6 4 -0.12 0.18
 -7 6 4 0.07 0.19
 -7 6 4 -0.16 0.16
 -7 6 4 -0.23 0.14
 -6 -6 4 0.48 0.11
 6 -6 -4 0.51 0.23
 6 -6 -4 0.58 0.26
 6 -6 -4 0.45 0.15
 6 -6 -4 0.35 0.2
 6 -6 -4 0.53 0.22
 -6 -6 4 0.39 0.19
 6 -6 -4 0.62 0.19
 -6 -6 4 0.4 0.17
 6 -6 -4 0.31 0.2
 -6 -6 4 0.83 0.21
 -6 -6 4 0.37 0.15
 6 -6 -4 0.52 0.23
 -6 6 4 0.47 0.23
 -6 6 4 0.88 0.26
 -6 6 4 0.63 0.21
 -6 6 4 0.46 0.24
 -6 6 4 0.88 0.23
 -6 6 4 0.08 0.18
 -6 6 4 0.47 0.1
 5 -6 -4 6.38 0.51
 -5 -6 4 5.3 0.52
 5 -6 -4 6.43 0.56
 -5 -6 4 6.22 0.45
 5 -6 -4 6.78 0.43
 5 -6 -4 6.09 0.59
 5 -6 -4 6.16 0.54
 5 -6 -4 6.43 0.35
 -5 -6 4 5.75 0.46
 -5 -6 4 6.29 0.41
 -5 -6 4 6.28 1.27
 -5 -6 4 6.38 0.35
 5 -6 -4 6.55 0.52
 5 -6 -4 6.12 0.47
 -5 6 4 6.16 0.4
 -5 6 4 6.59 0.5
 -5 6 4 7.69 0.53
 -5 6 4 6.68 0.49
 -5 6 4 6.85 0.53
 -5 6 4 7.32 0.53
 4 -6 -4 0.15 0.22
 4 -6 -4 0.41 0.16
 4 -6 -4 0.57 0.21
 4 -6 -4 0.35 0.21
 -4 -6 4 0.17 0.15
 -4 -6 4 0.16 0.18
 -4 -6 4 0.27 0.21
 4 -6 -4 0.47 0.24
 -4 -6 4 0.35 0.14
 -4 -6 4 0.26 0.14
 4 -6 -4 0.27 0.13
 4 -6 -4 0.28 0.18
 4 -6 -4 0.31 0.2
 -4 -6 4 0.09 0.14
 -4 6 4 0.48 0.21
 -4 6 4 0.26 0.2
 -4 6 4 0.27 0.17
 -4 6 4 0.3 0.13
 -4 6 4 0.3 0.22
 -4 6 4 0.19 0.18
 -3 6 4 0.63 0.23
 -3 6 4 0.82 0.23
 -3 6 4 1.06 0.24
 -3 6 4 0.4 0.19
 -3 6 4 0.8 0.2
 -3 6 4 0.84 0.28
 -3 6 4 0.37 0.22
 -2 -6 4 16.65 0.73
 -2 -6 4 15.43 0.49
 -2 -6 4 15.6 0.66
 2 -6 -4 17.43 0.82
 2 -6 -4 17.62 0.76
 2 -6 -4 15.4 0.87
 -2 -6 4 16.69 0.71
 2 -6 -4 17.24 0.73
 -2 6 4 18.25 0.77
 -2 6 4 17.51 0.78
 -2 6 4 18.16 0.79
 -2 6 4 17.31 0.84
 -2 6 4 16.89 0.73
 2 6 -4 18.2 0.85
 -1 -6 4 5.38 0.33
 1 -6 -4 5.62 0.41
 1 -6 -4 5.36 0.39
 1 -6 -4 5.35 0.48
 -1 6 4 5.71 0.47
 -1 6 4 5.47 0.44
 1 6 -4 5.78 0.47
 0 -6 4 27.38 1.08
 0 -6 4 27.38 0.97
 0 -6 4 27.78 1
 0 6 4 25.11 0.97
 0 6 4 26.51 1.06
 0 6 -4 28.23 1.01
 0 6 -4 26.42 1.07
 1 -6 4 25.98 1.02
 1 -6 4 30.72 1.08
 1 -6 4 32.97 1.2
 1 -6 4 30.95 1.04
 1 6 4 31.23 1.17
 -1 6 -4 30.31 1.2
 -1 6 -4 32.19 1.56
 1 6 4 32.18 1.44
 -1 6 -4 32.28 1.1
 -1 6 -4 32.51 1.1
 1 6 4 30.49 1.17
 2 -6 4 24.25 0.95
 2 -6 4 23.98 0.89
 2 -6 4 24.07 0.8
 2 -6 4 21.76 0.99
 -2 -6 -4 23.36 0.75
 2 -6 4 25.75 0.93
 2 6 4 25.25 1.26
 2 6 4 23.66 0.95
 -2 6 -4 25.37 0.97
 -2 6 -4 23.23 0.95
 -2 6 -4 24.87 1.23
 -2 6 -4 24.74 0.94
 -2 6 -4 25.67 1.09
 2 6 4 25.21 0.94
 3 -6 4 11.83 0.71
 3 -6 4 12.58 0.72
 3 -6 4 13.11 0.67
 3 -6 4 12.15 0.66
 3 -6 4 12.52 0.58
 -3 -6 -4 12.66 0.42
 -3 -6 -4 12.01 0.62
 3 -6 4 12.17 0.63
 -3 6 -4 12.6 0.65
 -3 6 -4 12.56 0.76
 -3 6 -4 14.2 0.68
 3 6 4 12.47 0.67
 -3 6 -4 12.32 0.59
 3 6 4 13.05 0.65
 -3 6 -4 13.54 0.7
 3 6 4 13.02 0.89
 -3 6 -4 12.7 0.77
 -4 -6 -4 36.46 2.91
 4 -6 4 35.83 1.35
 4 -6 4 35.25 1.39
 -4 -6 -4 36.19 1.18
 -4 -6 -4 35.81 1.18
 4 -6 4 36.23 1.21
 4 -6 4 36.32 1.26
 4 -6 4 36.57 1.13
 -4 -6 -4 34.78 1.18
 4 -6 4 36.58 1.33
 -4 6 -4 36.6 1.15
 4 6 4 37.53 1.33
 4 6 4 36.16 1.71
 -4 6 -4 36.74 1.25
 -4 6 -4 36.9 1.31
 -5 -6 -4 2.87 0.37
 5 -6 4 2.08 0.37
 5 -6 4 2.97 0.38
 -5 -6 -4 2.11 0.31
 5 -6 4 2.44 0.37
 5 -6 4 2.36 0.33
 -5 -6 -4 2.23 0.33
 5 -6 4 2.16 0.36
 5 -6 4 2.14 0.38
 -5 6 -4 2.83 0.38
 -5 6 -4 2.84 0.41
 5 6 4 2.4 0.39
 -5 6 -4 2.84 0.32
 5 6 4 2.78 0.49
 -5 6 -4 2.31 0.36
 6 -6 4 0.94 0.27
 6 -6 4 1.26 0.3
 -6 -6 -4 0.99 0.25
 6 -6 4 0.89 0.25
 6 -6 4 1.35 0.28
 -6 -6 -4 0.79 0.2
 6 -6 4 1.2 0.28
 6 -6 4 1.02 0.3
 -6 -6 -4 1.15 0.24
 6 6 4 1.06 0.26
 -6 6 -4 1.32 0.2
 -6 6 -4 1 0.25
 -6 6 -4 0.96 0.26
 -6 6 -4 1.02 0.31
 6 6 4 0.75 0.27
 7 -6 4 1.75 0.32
 -7 -6 -4 1.5 0.27
 7 -6 4 2.46 0.39
 -7 -6 -4 2.16 0.28
 7 -6 4 2.02 0.33
 -7 -6 -4 2.18 0.31
 7 -6 4 2.25 0.3
 -7 -6 -4 2.21 0.33
 7 6 4 1.59 0.27
 -7 6 -4 2.33 0.27
 -7 6 -4 1.71 0.29
 7 6 4 2.01 0.43
 8 -6 4 0.2 0.19
 -8 -6 -4 0.23 0.17
 -8 -6 -4 0.03 0.14
 -8 -6 -4 0.19 0.15
 -8 -6 -4 0.15 0.15
 -8 -6 -4 0.26 0.11
 -8 6 -4 0.46 0.19
 -8 6 -4 0.2 0.19
 8 6 4 0.1 0.15
 8 6 4 0.21 0.17
 -9 -6 -4 8.75 0.4
 9 -6 4 7.75 0.38
 9 6 4 7.56 0.52
 -9 6 -4 8.98 0.41
 9 6 4 8.35 0.41
 -9 6 -4 7.82 0.41
 -8 -7 4 11.78 0.49
 -8 -7 4 10.31 1.09
 -8 -7 4 11.87 0.63
 8 7 -4 10.91 0.7
 -8 7 4 11.45 0.44
 -8 7 4 11.12 0.48
 -8 7 4 11.55 0.42
 8 7 -4 11.93 0.54
 -7 -7 4 21.29 0.77
 -7 -7 4 21.77 1.9
 7 -7 -4 21.48 0.94
 -7 -7 4 21.42 1.03
 7 -7 -4 21.83 0.72
 7 -7 -4 20.19 0.85
 -7 7 4 21.78 0.75
 -7 7 4 21.1 0.81
 -7 7 4 22.51 0.76
 -7 7 4 22.89 0.75
 -7 7 4 21.55 0.82
 7 7 -4 22.28 0.75
 -6 -7 4 0.71 0.2
 -6 -7 4 0.11 0.2
 6 -7 -4 0.72 0.25
 6 -7 -4 0.5 0.15
 6 -7 -4 0.61 0.21
 -6 -7 4 0.33 0.17
 6 -7 -4 0.52 0.22
 6 -7 -4 0.51 0.19
 -6 -7 4 0.46 0.15
 -6 7 4 0.37 0.2
 -6 7 4 0.69 0.2
 6 7 -4 0.44 0.19
 -6 7 4 1.07 0.28
 -6 7 4 0.82 0.21
 -6 7 4 0.83 0.24
 -5 -7 4 1.42 0.27
 5 -7 -4 0.96 0.23
 -5 -7 4 1.02 0.2
 5 -7 -4 1.59 0.3
 5 -7 -4 1.12 0.28
 5 -7 -4 1.07 0.29
 5 -7 -4 0.93 0.24
 -5 -7 4 1.45 0.2
 -5 -7 4 0.88 0.22
 -5 7 4 1.44 0.26
 -5 7 4 1.1 0.25
 -5 7 4 1.26 0.2
 -5 7 4 1.71 0.31
 -4 -7 4 0.46 0.15
 4 -7 -4 0.47 0.19
 -4 -7 4 0.07 0.21
 -4 -7 4 0.28 0.17
 4 -7 -4 0.34 0.23
 -4 -7 4 0.55 0.14
 -4 -7 4 0.26 0.2
 4 -7 -4 0.36 0.22
 -4 -7 4 0.25 0.17
 4 -7 -4 0.63 0.23
 4 -7 -4 0.45 0.22
 -4 7 4 0.42 0.19
 -4 7 4 0.7 0.23
 -4 7 4 0.36 0.23
 -4 7 4 0.76 0.2
 -4 7 4 0.25 0.23
 -3 -7 4 0.52 0.21
 3 -7 -4 0.61 0.19
 3 -7 -4 1.14 0.26
 -3 -7 4 3.36 0.93
 3 -7 -4 0.94 0.26
 -3 -7 4 1.01 0.16
 3 -7 -4 0.87 0.26
 -3 -7 4 1.23 0.24
 3 -7 -4 1.07 0.26
 -3 -7 4 0.66 0.18
 -3 -7 4 0.45 0.19
 -3 7 4 0.89 0.25
 3 7 -4 0.9 0.3
 -3 7 4 1.56 0.31
 3 7 -4 0.93 0.33
 -3 7 4 1.12 0.19
 -3 7 4 0.8 0.23
 -3 7 4 0.95 0.25
 -3 7 4 1.1 0.27
 2 -7 -4 9.5 0.55
 2 -7 -4 9.14 0.63
 2 -7 -4 9.35 0.57
 -2 -7 4 8.39 0.52
 2 -7 -4 10.65 0.59
 -2 -7 4 9.5 0.57
 -2 -7 4 9.61 0.76
 -2 -7 4 10.13 0.52
 -2 7 4 9.84 0.6
 2 7 -4 9.35 0.63
 -2 7 4 10.14 0.59
 -2 7 4 9.79 0.6
 -2 7 4 10.05 0.51
 -2 7 4 9.45 0.59
 2 7 -4 10.28 0.83
 1 -7 -4 7.84 0.53
 -1 -7 4 7.46 0.49
 -1 -7 4 7.09 0.49
 1 -7 -4 7.52 0.51
 -1 -7 4 7.11 0.52
 -1 -7 4 7.13 0.34
 1 -7 -4 6.48 0.44
 -1 7 4 8.7 0.5
 1 7 -4 7.89 0.55
 -1 7 4 8.35 0.55
 -1 7 4 8.64 0.56
 1 7 -4 8.56 0.57
 1 7 -4 7.82 0.71
 -1 7 4 8.69 0.58
 0 -7 4 0.87 0.25
 0 -7 4 0.38 0.27
 0 -7 -4 0.79 0.2
 0 -7 4 0.54 0.16
 0 -7 4 0.42 0.21
 0 7 4 0.75 0.24
 0 7 -4 0.59 0.24
 0 7 4 0.48 0.23
 0 7 4 0.62 0.18
 0 7 -4 0.49 0.22
 0 7 -4 0.59 0.2
 0 7 4 0.89 0.22
 0 7 4 0.73 0.23
 0 7 4 0.76 0.26
 -1 7 -4 0.99 0.23
 1 7 4 1.42 0.29
 1 7 4 1.37 0.23
 1 7 4 1.77 0.32
 1 7 4 1.95 0.33
 1 7 4 1.58 0.35
 1 7 4 2.01 0.33
 -1 7 -4 1.52 0.29
 -1 7 -4 0.83 0.25
 2 -7 4 6.18 0.53
 2 -7 4 5.95 0.48
 -2 -7 -4 5.64 0.46
 2 -7 4 5.26 0.33
 2 -7 4 6.91 0.49
 2 -7 4 6.72 0.56
 2 -7 4 5.86 0.43
 -2 -7 -4 6.31 0.29
 2 7 4 6.06 0.46
 2 7 4 6.89 0.52
 -2 7 -4 6.81 0.57
 2 7 4 6.32 0.47
 -2 7 -4 6.15 0.49
 -2 7 -4 6.18 0.42
 2 7 4 7.54 0.5
 -2 7 -4 6.01 0.52
 2 7 4 5.76 0.57
 3 -7 4 0.15 0.16
 3 -7 4 -0.3 0.15
 -3 -7 -4 0.22 0.25
 -3 -7 -4 0.33 0.19
 3 -7 4 0.16 0.18
 3 -7 4 0.13 0.18
 3 -7 4 -0.08 0.18
 3 7 4 0.2 0.2
 3 7 4 -0.06 0.16
 -3 7 -4 0.28 0.19
 3 7 4 -0.1 0.18
 3 7 4 0.29 0.22
 -3 7 -4 0.03 0.16
 -3 7 -4 0.5 0.2
 4 -7 4 0.56 0.25
 -4 -7 -4 0.63 0.2
 -4 -7 -4 1.28 0.19
 4 -7 4 0.51 0.22
 4 -7 4 0.36 0.18
 -4 -7 -4 0.88 0.23
 4 -7 4 0.78 0.25
 -4 -7 -4 0.54 0.28
 4 -7 4 0.46 0.22
 4 7 4 0.89 0.23
 -4 7 -4 0.98 0.22
 -4 7 -4 0.39 0.23
 -4 7 -4 0.62 0.27
 4 7 4 0.65 0.23
 -4 7 -4 0.84 0.25
 4 7 4 0.79 0.25
 5 -7 4 13.38 0.71
 -5 -7 -4 14.75 0.64
 -5 -7 -4 14.97 0.68
 5 -7 4 14.02 0.77
 5 -7 4 14.86 0.59
 5 -7 4 15.71 0.73
 5 -7 4 15.3 0.71
 -5 -7 -4 13.76 1.64
 5 7 4 15.23 0.72
 -5 7 -4 15.43 0.58
 5 7 4 15.8 0.94
 -5 7 -4 15.63 0.75
 -5 7 -4 16.38 0.71
 5 7 4 15.27 0.71
 6 -7 4 10.43 0.59
 6 -7 4 10.67 0.62
 6 -7 4 11.16 0.61
 -6 -7 -4 11.46 0.56
 -6 -7 -4 11.08 1.41
 6 -7 4 11.25 0.5
 -6 -7 -4 11.54 0.52
 6 -7 4 10.74 0.65
 -6 7 -4 12.4 0.62
 6 7 4 11.55 0.77
 -6 7 -4 11.45 0.53
 6 7 4 12.07 0.6
 6 7 4 12.31 0.61
 7 -7 4 0.02 0.16
 7 -7 4 -0.1 0.13
 -7 -7 -4 -0.05 0.14
 -7 -7 -4 -0.18 0.14
 -7 -7 -4 -0.08 0.11
 -7 -7 -4 0.1 0.1
 7 -7 4 -0.43 0.17
 7 7 4 0.1 0.13
 7 7 4 0.05 0.14
 7 7 4 0.12 0.14
 -7 7 -4 0.1 0.09
 -7 7 -4 -0.02 0.15
 8 -7 4 1.65 0.19
 8 -7 4 1.7 0.24
 -8 -7 -4 1.45 0.22
 8 7 4 1.76 0.26
 8 7 4 2.04 0.24
 8 7 4 1.42 0.2
 8 7 4 1.83 0.21
 -8 7 -4 1.96 0.26
 -8 7 -4 1.79 0.25
 -6 -8 4 9.22 1.15
 6 -8 -4 10.12 0.55
 -6 -8 4 10.39 0.63
 -6 -8 4 10.31 0.47
 6 -8 -4 10.92 0.46
 -6 8 4 10.73 0.48
 -6 8 4 11.06 0.55
 -6 8 4 10.52 0.51
 6 8 -4 10.88 0.52
 -6 8 4 10.35 0.46
 6 8 -4 10.8 0.66
 5 -8 -4 0.3 0.18
 5 -8 -4 0.15 0.15
 -5 -8 4 0.24 0.07
 -5 -8 4 0.24 0.15
 -5 -8 4 0.05 0.13
 -5 -8 4 -0.06 0.14
 -5 8 4 0.07 0.15
 5 8 -4 0.2 0.17
 -5 8 4 0.2 0.17
 5 8 -4 0.31 0.16
 -4 -8 4 0.05 0.18
 -4 -8 4 0.62 0.19
 4 -8 -4 0.11 0.18
 -4 -8 4 0.02 0.14
 4 -8 -4 0.21 0.16
 -4 -8 4 0.27 0.12
 4 -8 -4 0.08 0.18
 4 8 -4 0.17 0.2
 -4 8 4 0.35 0.18
 4 8 -4 0.5 0.19
 -4 8 4 0.49 0.2
 -4 8 4 0.37 0.16
 4 8 -4 0.18 0.17
 -4 8 4 0.01 0.18
 3 -8 -4 3.64 0.41
 3 -8 -4 3.24 0.37
 -3 -8 4 3.63 0.31
 -3 -8 4 3.58 0.28
 3 -8 -4 3.6 0.45
 -3 -8 4 2.6 0.34
 3 -8 -4 3.76 0.43
 3 -8 -4 3.62 0.32
 -3 8 4 3.93 0.2
 -3 8 4 3.56 0.37
 3 8 -4 4.47 0.4
 -3 8 4 3.23 0.35
 -3 8 4 3.01 0.36
 3 8 -4 3.72 0.49
 -3 8 4 3.44 0.38
 3 8 -4 3.93 0.41
 2 -8 -4 1.7 0.32
 2 -8 -4 0.91 0.27
 -2 -8 4 2.23 0.29
 -2 -8 4 1.45 0.26
 2 -8 -4 1.53 0.3
 2 -8 -4 1.82 0.26
 -2 -8 4 1.48 0.25
 -2 -8 4 1.58 0.2
 2 -8 -4 1.84 0.35
 -2 8 4 2.08 0.34
 -2 8 4 1.88 0.29
 2 8 -4 1.98 0.32
 -2 8 4 1.29 0.27
 2 8 -4 1.52 0.27
 2 8 -4 2.04 0.41
 -2 8 4 1.7 0.25
 -2 8 4 1.75 0.3
 -1 -8 4 8.57 0.45
 1 -8 -4 9.62 0.54
 -1 -8 4 8.99 0.52
 -1 -8 4 8.84 0.54
 1 -8 -4 8.54 0.43
 1 8 -4 9.77 0.57
 -1 8 4 8.61 0.59
 1 8 -4 9.09 0.55
 -1 8 4 9.46 0.55
 -1 8 4 9.29 0.57
 -1 8 4 9.02 0.57
 1 8 -4 9.06 0.7
 -1 8 4 9.68 0.49
 0 -8 -4 0.32 0.13
 0 -8 -4 0.22 0.19
 0 -8 4 0.24 0.19
 0 -8 4 0.03 0.2
 0 -8 4 0.18 0.11
 0 -8 4 0.11 0.17
 0 8 -4 -0.06 0.19
 0 8 -4 0.05 0.16
 0 8 4 0.17 0.22
 0 8 -4 0.09 0.17
 0 8 4 0.05 0.18
 0 8 4 0.14 0.18
 0 8 4 -0.03 0.17
 1 -8 4 0.35 0.15
 1 -8 4 0.15 0.19
 1 -8 4 0.2 0.22
 1 -8 4 0.09 0.21
 -1 -8 -4 0.33 0.17
 1 -8 4 0.26 0.23
 -1 8 -4 0.25 0.17
 1 8 4 0.34 0.2
 1 8 4 0.25 0.18
 1 8 4 0.32 0.19
 -1 8 -4 0.1 0.19
 1 8 4 0.53 0.21
 -1 8 -4 -0.12 0.2
 -1 8 -4 0.45 0.16
 2 -8 4 3.42 0.32
 -2 -8 -4 3 0.29
 2 -8 4 2.86 0.37
 2 -8 4 3.07 0.39
 2 -8 4 2.44 0.36
 2 -8 4 3.08 0.45
 2 -8 4 3.04 0.39
 2 8 4 3.69 0.31
 -2 8 -4 3.47 0.39
 -2 8 -4 3.57 0.36
 2 8 4 3.2 0.41
 2 8 4 3.19 0.37
 2 8 4 4.23 0.4
 2 8 4 3.24 0.38
 2 8 4 3.84 0.39
 3 -8 4 -0.09 0.18
 -3 -8 -4 0.08 0.08
 -3 -8 -4 -0.18 0.22
 3 -8 4 0.1 0.2
 -3 -8 -4 0.02 0.17
 3 -8 4 0.18 0.19
 3 -8 4 0.3 0.18
 3 -8 4 0.02 0.15
 -3 8 -4 0.04 0.17
 3 8 4 -0.02 0.13
 3 8 4 -0.02 0.16
 3 8 4 -0.15 0.17
 3 8 4 -0.08 0.13
 3 8 4 0.33 0.2
 3 8 4 0.39 0.22
 -3 8 -4 -0.01 0.15
 -4 -8 -4 3.03 0.35
 -4 -8 -4 3.28 0.34
 4 -8 4 3.36 0.43
 4 -8 4 3.3 0.38
 -4 -8 -4 2.91 0.96
 4 -8 4 2.6 0.39
 4 -8 4 3.46 0.2
 4 -8 4 3.34 0.34
 -4 8 -4 3.5 0.38
 4 8 4 3.3 0.38
 -4 8 -4 2.61 0.37
 4 8 4 3.17 0.35
 4 8 4 3.33 0.37
 -4 8 -4 3.2 0.28
 4 8 4 3.1 0.35
 4 8 4 3.56 0.31
 -5 -8 -4 1.66 0.22
 -5 -8 -4 1.52 0.21
 5 -8 4 1.81 0.16
 -5 -8 -4 1.57 0.24
 5 -8 4 1.87 0.28
 5 -8 4 1.16 0.25
 -5 8 -4 1.89 0.28
 5 8 4 1.73 0.26
 -5 8 -4 1.59 0.26
 5 8 4 2.07 0.3
 5 8 4 1.68 0.23
 5 8 4 1.26 0.24
 5 8 4 1.7 0.31
 6 -8 4 0.91 0.22
 -6 -8 -4 0.76 0.13
 6 -8 4 0.71 0.18
 -6 8 -4 0.74 0.13
 6 8 4 0.66 0.17
 6 8 4 0.63 0.17
 6 8 4 0.84 0.21
 6 8 4 0.77 0.17
 -6 8 -4 1.06 0.2
 6 8 4 0.57 0.13
 4 -9 -4 1.64 0.14
 4 -9 -4 1.7 0.26
 4 9 -4 1.65 0.26
 4 9 -4 1.58 0.22
 -4 9 4 1.54 0.24
 -4 9 4 1.84 0.22
 4 9 -4 1.84 0.25
 3 -9 -4 2.21 0.28
 3 -9 -4 2.04 0.16
 -3 -9 4 1.98 0.2
 -3 9 4 2.26 0.26
 -3 9 4 1.9 0.28
 3 9 -4 1.69 0.29
 -3 9 4 1.51 0.22
 3 9 -4 2.45 0.25
 3 9 -4 2 0.28
 2 9 -4 1.49 0.23
 2 9 -4 1.74 0.29
 -2 9 4 1.44 0.22
 2 9 -4 1.49 0.24
 -2 9 4 1.43 0.24
 -2 9 4 1.78 0.26
 -1 -9 4 1.26 0.2
 -1 -9 4 1.59 0.23
 1 -9 -4 0.97 0.19
 1 9 -4 1.3 0.21
 1 9 -4 1.35 0.24
 1 9 -4 1.46 0.28
 -1 9 4 1.61 0.25
 -1 9 4 1.42 0.24
 -1 9 4 1.22 0.2
 -1 9 4 1.82 0.19
 0 -9 4 1.46 0.2
 0 -9 4 1.44 0.24
 0 -9 -4 1.05 0.17
 0 -9 -4 1.14 0.29
 0 -9 4 1.02 0.21
 0 9 4 1.4 0.19
 0 9 4 0.94 0.23
 0 9 4 1.34 0.25
 0 9 4 0.81 0.19
 0 9 -4 0.92 0.22
 0 9 4 0.93 0.21
 0 9 -4 1.11 0.23
 -1 -9 -4 1.09 0.26
 1 -9 4 0.9 0.18
 1 -9 4 1.09 0.24
 1 -9 4 0.95 0.21
 -1 -9 -4 1.07 0.14
 1 9 4 1.24 0.21
 1 9 4 1.27 0.23
 -1 9 -4 1.1 0.19
 1 9 4 0.88 0.21
 -1 9 -4 0.83 0.22
 1 9 4 0.98 0.2
 2 -9 4 3.2 0.28
 2 -9 4 3.75 0.38
 -2 -9 -4 3.29 0.35
 -2 -9 -4 3.43 0.35
 -2 9 -4 3.53 0.34
 2 9 4 3.11 0.32
 -2 9 -4 3.69 0.3
 2 9 4 3.41 0.32
 2 9 4 4.03 0.34
 2 9 4 3.13 0.3
 3 -9 4 0.86 0.22
 -3 -9 -4 0.52 0.25
 3 -9 4 0.79 0.11
 3 -9 4 0.86 0.18
 -3 -9 -4 0.81 0.18
 -3 -9 -4 0.98 0.19
 3 9 4 0.84 0.19
 3 9 4 0.5 0.16
 -3 9 -4 0.88 0.2
 -3 9 -4 0.98 0.15
 -3 9 -4 0.95 0.2
 3 9 4 0.84 0.18
 3 9 4 0.64 0.18
 4 -9 4 0.97 0.23
 -4 -9 -4 0.84 0.14
 4 -9 4 0.84 0.17
 -4 -9 -4 0.69 0.14
 4 -9 4 0.78 0.11
 4 9 4 0.62 0.15
 -4 9 -4 0.61 0.16
 4 9 4 1.13 0.18
 4 9 4 0.46 0.15
 -4 9 -4 0.89 0.17
 -11 0 5 -0.06 0.07
 -11 0 5 0.07 0.14
 11 0 -5 0.06 0.13
 -11 0 5 0.09 0.15
 -11 0 5 0.04 0.15
 -11 0 5 0.04 0.09
 -10 0 5 0.06 0.1
 -10 0 5 0.06 0.11
 -10 0 5 0.01 0.17
 -10 0 5 0.05 0.19
 -10 0 5 -0.03 0.17
 -9 0 5 0.34 0.12
 -9 0 5 0.16 0.2
 -9 0 5 0.07 0.11
 -9 0 5 0.37 0.2
 -9 0 5 0.11 0.2
 -8 0 5 0.18 0.2
 -8 0 5 0.03 0.09
 -8 0 5 0.02 0.11
 -8 0 5 0.04 0.19
 -8 0 5 0.08 0.17
 7 0 -5 0.07 0.1
 7 0 -5 -0.02 0.1
 6 0 -5 0.11 0.07
 6 0 -5 -0.06 0.06
 6 0 -5 0.12 0.13
 5 0 -5 0.03 0.05
 -5 0 5 0.09 0.1
 -5 0 5 -0.09 0.09
 -4 0 5 -0.06 0.07
 -4 0 5 -0.05 0.08
 -3 0 5 0.01 0.08
 -3 0 5 0.03 0.07
 -2 0 5 0.04 0.07
 -1 0 5 0.03 0.07
 0 0 -5 0.02 0.05
 -1 0 -5 0.02 0.06
 -2 0 -5 -0.25 0.07
 3 0 5 0.03 0.09
 -3 0 -5 0.02 0.08
 4 0 5 0 0.09
 4 0 5 0.03 0.1
 5 0 5 -0.07 0.1
 5 0 5 0.05 0.1
 6 0 5 -0.01 0.1
 7 0 5 0.14 0.11
 -8 0 -5 0.19 0.19
 8 0 5 0.28 0.22
 -8 0 -5 0.04 0.16
 -8 0 -5 -0.05 0.17
 -8 0 -5 0.25 0.2
 8 0 5 0.26 0.14
 -8 0 -5 -0.07 0.18
 -8 0 -5 0.02 0.19
 -9 0 -5 0.06 0.18
 9 0 5 -0.14 0.21
 -9 0 -5 0.06 0.17
 -9 0 -5 0 0.13
 9 0 5 -0.07 0.19
 -9 0 -5 0.1 0.16
 9 0 5 -0.02 0.23
 9 0 5 -0.03 0.12
 -9 0 -5 0.03 0.17
 -10 0 -5 0.03 0.16
 -10 0 -5 0.07 0.14
 -10 0 -5 0 0.15
 -10 0 -5 -0.04 0.15
 10 0 5 -0.04 0.17
 -10 0 -5 -0.05 0.18
 -10 0 -5 0.05 0.13
 10 0 5 0.26 0.23
 10 0 5 -0.05 0.19
 11 0 5 0 0.14
 11 0 5 0.01 0.15
 -11 0 -5 -0.05 0.13
 -11 0 -5 0.09 0.08
 -11 0 -5 -0.28 0.12
 -11 -1 5 1.67 0.25
 11 -1 -5 1.69 0.22
 -11 -1 5 2.11 0.28
 -11 -1 5 1.56 0.26
 -11 -1 5 1.63 0.25
 -11 -1 5 1.8 0.17
 -11 1 5 1.39 0.25
 -11 1 5 1.78 0.19
 -11 1 5 1.77 0.27
 -11 1 5 1.23 0.22
 -11 1 5 1.42 0.28
 -10 -1 5 5.9 0.45
 -10 -1 5 5.48 0.31
 -10 -1 5 5.82 0.47
 -10 -1 5 5.53 0.46
 10 -1 -5 5.39 0.36
 -10 -1 5 6.18 0.47
 -10 1 5 5.14 0.33
 -10 1 5 5.71 0.45
 -10 1 5 5.23 0.49
 -10 1 5 4.87 0.43
 -10 1 5 5.47 0.46
 -9 -1 5 4.24 0.29
 -9 -1 5 3.96 0.41
 -9 -1 5 4.6 0.45
 -9 -1 5 4.19 0.42
 -9 -1 5 4.46 0.41
 -9 1 5 4.93 0.33
 -9 1 5 4.67 0.47
 -9 1 5 5.5 0.47
 -9 1 5 4.26 0.41
 -9 1 5 4.13 0.44
 8 -1 -5 34.85 1.16
 8 -1 -5 35.29 1.28
 -8 -1 5 35.19 1.42
 -8 -1 5 34.08 1.16
 -8 -1 5 35.14 0.97
 -8 -1 5 34.58 1.17
 -8 -1 5 33.7 1.17
 -8 1 5 35.23 1.17
 -8 1 5 35.81 1
 -8 1 5 35.38 0.84
 -8 1 5 32.16 1.17
 -8 1 5 34.26 1.18
 -8 1 5 34.34 1.15
 -8 1 5 33.43 1.44
 7 -1 -5 0.39 0.15
 7 -1 -5 0.15 0.12
 7 -1 -5 0.33 0.2
 -7 1 5 0.18 0.21
 -7 1 5 0.12 0.19
 7 1 -5 0.2 0.11
 6 -1 -5 10.29 0.46
 6 -1 -5 10.93 0.43
 6 -1 -5 10.64 0.56
 6 1 -5 9.89 0.4
 6 1 -5 10.71 0.36
 -6 1 5 10 0.48
 5 -1 -5 2.68 0.19
 5 -1 -5 2.76 0.16
 -5 1 5 2.73 0.23
 5 1 -5 2.53 0.14
 -5 1 5 2.43 0.27
 4 -1 -5 107.39 2.69
 4 -1 -5 111.86 2.8
 -4 1 5 100.63 2.84
 -4 1 5 110.03 2.7
 -4 1 5 112.11 2.59
 3 -1 -5 1.13 0.1
 -3 1 5 0.79 0.13
 -3 1 5 1.04 0.15
 -3 1 5 0.99 0.16
 2 -1 -5 9.18 0.3
 -2 1 5 10.35 0.39
 -2 1 5 10.03 0.37
 1 -1 -5 2.17 0.13
 -1 1 5 2.41 0.17
 0 -1 -5 730.65 17.9
 0 1 5 819.36 18.83
 -1 -1 -5 2.8 0.18
 1 1 5 3.09 0.17
 -1 1 -5 2.88 0.19
 -2 -1 -5 1.79 0.16
 2 -1 5 1.72 0.16
 2 -1 5 1.6 0.2
 2 1 5 1.76 0.13
 -2 1 -5 1.84 0.17
 3 -1 5 77.28 2.1
 3 -1 5 78.79 2.13
 -3 1 -5 78.65 2.16
 -3 1 -5 80.75 1.95
 4 -1 5 4.75 0.32
 4 -1 5 4.59 0.31
 -4 1 -5 4.35 0.27
 5 -1 5 0.55 0.13
 5 -1 5 0.53 0.16
 5 -1 5 0.42 0.15
 5 -1 5 0.53 0.15
 -5 1 -5 0.55 0.14
 6 -1 5 22.36 0.85
 6 -1 5 21.05 0.86
 6 -1 5 22.21 0.66
 6 -1 5 20.48 0.88
 6 1 5 24.16 0.72
 7 -1 5 10.46 0.6
 7 -1 5 9.83 0.43
 -7 1 -5 11.48 0.65
 7 1 5 10.32 0.62
 7 1 5 10.42 0.46
 8 -1 5 100.77 2.85
 8 -1 5 105.36 3.88
 -8 -1 -5 103.36 2.58
 -8 -1 -5 99.87 2.47
 8 -1 5 103.07 2.38
 -8 -1 -5 101.06 2.55
 -8 -1 -5 104.08 2.55
 -8 -1 -5 108.45 3.77
 -8 -1 -5 100.53 2.58
 8 -1 5 103.97 2.96
 8 1 5 101.6 2.85
 -8 1 -5 100.57 2.65
 -8 1 -5 98.85 2.32
 -8 1 -5 103.29 2.55
 8 1 5 103.97 2.4
 -8 1 -5 117.66 3.84
 9 -1 5 0.34 0.22
 9 -1 5 -0.1 0.19
 -9 -1 -5 0.12 0.17
 -9 -1 -5 0.22 0.18
 -9 -1 -5 0.29 0.19
 9 -1 5 0.28 0.24
 -9 -1 -5 0.07 0.15
 -9 -1 -5 0.21 0.2
 -9 -1 -5 -0.13 0.16
 9 -1 5 0.23 0.15
 -9 1 -5 0.3 0.21
 9 1 5 0.07 0.22
 -9 1 -5 0.21 0.18
 9 1 5 0.29 0.22
 -10 -1 -5 0.13 0.15
 10 -1 5 0.31 0.22
 -10 -1 -5 0.47 0.15
 10 -1 5 0.48 0.2
 -10 -1 -5 0.37 0.19
 -10 -1 -5 0.64 0.2
 -10 -1 -5 0.93 0.21
 10 -1 5 0.23 0.23
 -10 -1 -5 0.29 0.18
 -10 1 -5 0.29 0.18
 -10 1 -5 0.06 0.17
 -10 1 -5 0.72 0.17
 10 1 5 0.23 0.22
 10 1 5 0.42 0.19
 -11 -1 -5 0.26 0.15
 11 -1 5 0.33 0.15
 -11 -1 -5 0.25 0.14
 -11 -1 -5 0.34 0.15
 -11 -1 -5 0.24 0.07
 11 -1 5 0.18 0.16
 11 -1 5 0.17 0.19
 -11 1 -5 0.12 0.14
 11 1 5 0.26 0.17
 11 1 5 0.26 0.14
 -11 1 -5 0.49 0.11
 -11 1 -5 0.3 0.15
 -11 -2 5 3.37 0.3
 -11 -2 5 2.95 0.31
 -11 -2 5 3.5 0.33
 -11 -2 5 3.39 0.17
 -11 -2 5 3.56 0.33
 -11 2 5 3.33 0.31
 -11 2 5 3.6 0.37
 -11 2 5 3.7 0.24
 -11 2 5 3.71 0.34
 -11 2 5 3.69 0.32
 10 -2 -5 0.29 0.17
 -10 -2 5 0.12 0.17
 -10 -2 5 0.17 0.18
 -10 -2 5 0.05 0.09
 -10 -2 5 0.15 0.18
 -10 -2 5 0.01 0.09
 10 -2 -5 0.03 0.13
 -10 2 5 0.01 0.18
 -10 2 5 0.01 0.12
 -10 2 5 0.11 0.18
 -10 2 5 0 0.16
 -10 2 5 -0.06 0.11
 -9 -2 5 3.04 0.39
 9 -2 -5 2.59 0.27
 9 -2 -5 2.58 0.41
 -9 -2 5 3.22 0.38
 -9 -2 5 2.32 0.23
 -9 -2 5 2.36 0.33
 -9 -2 5 2.72 0.37
 -9 2 5 2.57 0.37
 -9 2 5 2.7 0.15
 -9 2 5 2.76 0.33
 -9 2 5 2.56 0.38
 -9 2 5 2.27 0.34
 -9 2 5 3.33 0.29
 -9 2 5 2.96 0.37
 -8 -2 5 5.51 0.44
 -8 -2 5 5.14 0.44
 8 -2 -5 5.58 0.51
 8 -2 -5 5.06 0.4
 -8 -2 5 5.14 0.3
 -8 -2 5 4.83 0.46
 8 -2 -5 5.68 0.52
 -8 -2 5 5.14 0.44
 -8 2 5 6.35 0.48
 -8 2 5 4.77 0.29
 -8 2 5 5.39 0.49
 -8 2 5 4.99 0.47
 -8 2 5 5.44 0.43
 -8 2 5 5.23 0.35
 7 -2 -5 2.69 0.31
 7 -2 -5 2.69 0.35
 -7 -2 5 2.32 0.32
 7 -2 -5 2.68 0.27
 -7 2 5 2.61 0.39
 -7 2 5 2.58 0.34
 -7 2 5 3.05 0.31
 -7 2 5 2.61 0.28
 -7 2 5 2.81 0.26
 -7 2 5 3.15 0.39
 6 -2 -5 4.39 0.35
 6 -2 -5 6.32 0.46
 6 -2 -5 5.17 0.35
 6 -2 -5 5.06 0.35
 6 -2 -5 5.68 0.33
 -6 2 5 5.62 0.38
 5 -2 -5 131.78 3.42
 5 -2 -5 126.18 3.05
 5 -2 -5 131.19 3.47
 5 -2 -5 127.94 3.29
 5 2 -5 131.13 3.34
 -5 2 5 129.15 3.32
 -5 2 5 132.96 3.2
 4 -2 -5 73.21 1.91
 4 -2 -5 74 1.99
 4 -2 -5 72.02 1.81
 -4 2 5 75.02 2
 -4 2 5 72.52 2.12
 -4 2 5 75.89 1.92
 4 2 -5 76.47 1.92
 3 -2 -5 269.96 6.6
 3 -2 -5 256.9 6.41
 3 2 -5 262.75 6.68
 -3 2 5 273.37 6.15
 -3 2 5 280.67 6.48
 -3 2 5 270.61 6.74
 2 -2 -5 43.47 1.18
 2 -2 -5 44.88 1.24
 2 2 -5 42.51 1.13
 -2 2 5 42.53 1.26
 -2 2 5 43.14 1.14
 -2 2 5 44.95 1.22
 1 -2 -5 290.79 7.32
 1 -2 -5 312.97 7.52
 1 2 -5 284.22 7.46
 -1 2 5 314.27 7.1
 -1 2 5 306.3 6.71
 0 -2 -5 0.04 0.07
 0 -2 -5 0.58 0.11
 0 2 5 0.18 0.09
 -1 -2 -5 17.6 0.59
 -1 -2 -5 16.46 0.55
 1 -2 5 17.41 0.62
 1 2 5 17.93 0.57
 -2 -2 -5 62.33 1.69
 2 -2 5 60.3 1.7
 2 -2 5 61.3 1.71
 -2 2 -5 63.57 1.67
 2 2 5 67.54 1.68
 -2 2 -5 68.21 1.85
 3 -2 5 25.67 0.77
 3 -2 5 26.24 0.87
 3 -2 5 25.03 0.88
 -3 2 -5 26.77 0.84
 -3 2 -5 27.65 0.84
 4 -2 5 1.24 0.21
 4 -2 5 1.33 0.21
 4 -2 5 2.12 0.24
 4 -2 5 1.95 0.2
 -4 2 -5 1.24 0.18
 5 -2 5 0.17 0.13
 5 -2 5 0.36 0.12
 5 -2 5 0.52 0.17
 -5 2 -5 0.3 0.14
 6 -2 5 38.39 1.34
 6 -2 5 37.09 1
 6 -2 5 37.28 1.28
 -6 2 -5 39.79 1.25
 -7 -2 -5 0.05 0.17
 7 -2 5 0.12 0.18
 7 -2 5 -0.03 0.11
 -7 -2 -5 0.06 0.17
 7 -2 5 0.14 0.17
 -7 2 -5 0.17 0.24
 -7 2 -5 0.36 0.18
 -7 2 -5 0.12 0.19
 8 -2 5 5.27 0.66
 8 -2 5 6.11 0.36
 -8 -2 -5 4.99 0.39
 8 -2 5 6.01 0.51
 -8 -2 -5 5.76 0.47
 -8 -2 -5 5.6 0.45
 -8 -2 -5 5.66 0.44
 -8 -2 -5 6.14 0.61
 8 -2 5 5.9 0.5
 -8 -2 -5 5.37 0.45
 -8 2 -5 5.4 0.48
 -8 2 -5 5.12 0.42
 -8 2 -5 5.07 0.31
 -9 -2 -5 15.88 0.97
 9 -2 5 14.68 0.76
 -9 -2 -5 15.65 0.7
 9 -2 5 15.97 0.59
 9 -2 5 15.4 0.99
 9 -2 5 15.04 0.79
 -9 -2 -5 15.32 0.62
 -9 -2 -5 14.3 0.7
 -9 -2 -5 15.61 0.7
 9 -2 5 15.51 0.81
 -9 -2 -5 16.05 0.73
 -9 2 -5 15.34 0.69
 -9 2 -5 15.61 0.75
 9 2 5 15.63 1.05
 9 2 5 15.71 0.82
 -10 -2 -5 0.31 0.12
 10 -2 5 0.28 0.2
 -10 -2 -5 0.06 0.16
 -10 -2 -5 0.11 0.15
 10 -2 5 0.39 0.17
 10 -2 5 0.12 0.2
 -10 -2 -5 0.12 0.16
 -10 -2 -5 0.36 0.17
 -10 2 -5 0.14 0.15
 -10 2 -5 0.14 0.17
 10 2 5 0.46 0.22
 10 2 5 0.22 0.19
 -11 -2 -5 15.76 0.58
 11 -2 5 15.49 0.61
 11 -2 5 14.8 0.79
 -11 -2 -5 16.42 0.6
 11 -2 5 16.06 0.7
 -11 -2 -5 16.84 0.59
 -11 2 -5 16.12 0.5
 11 2 5 16.49 0.67
 11 2 5 16.37 0.87
 -11 2 -5 16.82 0.62
 -11 -3 5 0.19 0.13
 -11 -3 5 0.01 0.07
 -11 -3 5 0.1 0.13
 11 -3 -5 0.03 0.16
 11 -3 -5 0.32 0.14
 -11 3 5 0.16 0.13
 -11 3 5 0.05 0.11
 -11 3 5 0.14 0.1
 -11 3 5 0.02 0.11
 -11 3 5 0.18 0.11
 -10 -3 5 6.16 0.42
 -10 -3 5 7.47 0.48
 10 -3 -5 6.09 0.34
 -10 -3 5 7.07 0.3
 -10 -3 5 6.53 0.48
 -10 3 5 7.9 0.49
 -10 3 5 6.79 0.46
 -10 3 5 7.25 0.58
 -10 3 5 6.79 0.46
 -10 3 5 7.43 0.4
 9 -3 -5 11.43 0.61
 9 -3 -5 11.49 0.72
 -9 -3 5 12.13 0.47
 -9 -3 5 12.89 0.64
 -9 -3 5 11.73 0.7
 9 -3 -5 12 0.5
 -9 -3 5 11.38 0.63
 -9 -3 5 11.85 0.61
 -9 3 5 10.79 0.6
 -9 3 5 11.27 0.76
 -9 3 5 12.51 0.66
 -9 3 5 11.85 0.41
 -9 3 5 12.32 0.64
 -9 3 5 11.39 0.53
 -8 -3 5 2.86 0.37
 8 -3 -5 2.16 0.33
 -8 -3 5 2.68 0.36
 8 -3 -5 2.78 0.43
 8 -3 -5 2.39 0.33
 -8 -3 5 2.57 0.34
 8 -3 -5 2.17 0.4
 -8 -3 5 2.24 0.32
 -8 -3 5 2.35 0.23
 8 -3 -5 2.68 0.26
 -8 3 5 2 0.31
 -8 3 5 2.35 0.36
 -8 3 5 2.21 0.33
 -8 3 5 2.43 0.36
 -8 3 5 2.51 0.4
 -8 3 5 2.41 0.25
 -8 3 5 2.28 0.28
 7 -3 -5 11.05 0.6
 -7 -3 5 11.05 0.6
 -7 -3 5 10.33 0.44
 -7 -3 5 11.3 0.65
 7 -3 -5 11.37 0.47
 -7 -3 5 10.78 0.6
 7 -3 -5 11.77 0.71
 7 -3 -5 11.15 0.58
 -7 -3 5 10.81 0.6
 7 -3 -5 11.05 0.65
 7 -3 -5 10.65 0.56
 -7 3 5 11.93 0.62
 -7 3 5 9.82 0.65
 -7 3 5 11.22 0.56
 -7 3 5 12.27 0.5
 -7 3 5 9.83 0.6
 -7 3 5 10.98 0.73
 -7 3 5 11.34 0.62
 -7 3 5 11.3 0.53
 -7 3 5 12.39 0.62
 6 -3 -5 15.95 0.67
 6 -3 -5 16.63 0.74
 6 -3 -5 15.65 0.66
 6 -3 -5 16.22 0.8
 6 -3 -5 16.66 0.7
 6 -3 -5 16.15 0.56
 -6 3 5 16.9 0.73
 -6 3 5 16.94 0.78
 5 -3 -5 3.05 0.28
 5 -3 -5 3.54 0.24
 5 -3 -5 3.01 0.33
 5 -3 -5 3.08 0.26
 5 -3 -5 2.55 0.27
 5 -3 -5 3.72 0.3
 -5 3 5 2.99 0.29
 -5 3 5 4.04 0.34
 4 -3 -5 98.78 2.42
 4 -3 -5 95.83 2.58
 4 -3 -5 100.57 2.7
 4 -3 -5 97.36 2.71
 -4 3 5 103.04 2.6
 -4 3 5 103.77 2.73
 3 -3 -5 5.08 0.32
 3 -3 -5 4.99 0.31
 3 -3 -5 6.51 0.32
 -3 3 5 5.08 0.32
 -3 3 5 4.82 0.35
 -3 3 5 5.12 0.33
 2 -3 -5 263.83 6.03
 2 -3 -5 283.91 6.94
 2 -3 -5 275.35 6.74
 -2 3 5 287.14 6.77
 -2 3 5 284.44 6.4
 -2 3 5 277.25 7.01
 1 -3 -5 11.06 0.44
 1 -3 -5 11.37 0.45
 1 -3 -5 12.22 0.49
 -1 -3 5 11.95 0.51
 -1 3 5 11.94 0.49
 -1 3 5 11.19 0.43
 -1 3 5 11.09 0.48
 0 -3 -5 414.81 9.97
 0 -3 5 403.85 8.68
 0 -3 5 381.12 9.7
 0 -3 -5 397.88 9.71
 0 3 -5 423.55 9.49
 0 3 5 419.92 9.43
 0 3 5 438.38 10.02
 1 -3 5 87.2 2.07
 -1 -3 -5 85.98 2.31
 1 -3 5 81.47 2.29
 1 3 5 97.24 2.44
 -1 3 -5 94.77 2.35
 2 -3 5 13.93 0.6
 2 -3 5 14.36 0.54
 2 3 5 15.54 0.55
 -2 3 -5 14.61 0.61
 -2 3 -5 15.87 0.61
 -2 3 -5 14.92 0.58
 3 -3 5 108.59 2.94
 3 -3 5 109.81 2.61
 3 -3 5 106.34 2.77
 3 -3 5 107.89 2.53
 -3 3 -5 115.45 2.88
 -3 3 -5 119.5 3.01
 4 -3 5 20.09 0.59
 4 -3 5 20.32 0.73
 4 -3 5 20.41 0.72
 4 -3 5 20.44 0.8
 4 -3 5 20.63 0.84
 -4 3 -5 22.35 0.8
 -4 3 -5 20.48 0.78
 5 -3 5 22.32 0.91
 5 -3 5 20.98 0.76
 5 -3 5 19.76 0.84
 5 -3 5 19.01 0.61
 5 -3 5 20.35 0.74
 -5 3 -5 21.51 0.83
 6 -3 5 0.26 0.19
 6 -3 5 0.18 0.17
 6 -3 5 0.34 0.13
 6 -3 5 0.44 0.22
 -6 3 -5 0.4 0.18
 7 -3 5 21.84 0.97
 7 -3 5 22.21 0.71
 7 -3 5 22.01 0.92
 -7 -3 -5 22.33 0.82
 7 -3 5 21.35 1.19
 -7 -3 -5 22.97 0.88
 -7 -3 -5 22.91 1.2
 7 -3 5 23.07 1.02
 -7 -3 -5 23.39 0.87
 -7 -3 -5 21.24 0.87
 -7 3 -5 23.17 0.82
 -7 3 -5 23.12 0.94
 -7 3 -5 23.75 0.95
 8 -3 5 4.82 0.58
 -8 -3 -5 4.63 0.4
 8 -3 5 3.71 0.46
 8 -3 5 4.29 0.43
 -8 -3 -5 4.74 0.38
 8 -3 5 4.19 0.32
 -8 -3 -5 4.08 0.53
 -8 -3 -5 4.67 0.43
 -8 -3 -5 4.82 0.43
 8 3 5 5.37 0.67
 -8 3 -5 4.67 0.43
 -8 3 -5 4.37 0.31
 8 3 5 4.59 0.56
 -8 3 -5 4.38 0.43
 9 -3 5 0.06 0.2
 -9 -3 -5 0.3 0.19
 9 -3 5 -0.02 0.19
 -9 -3 -5 0.12 0.15
 -9 -3 -5 0 0.14
 -9 -3 -5 -0.03 0.15
 9 -3 5 -0.02 0.13
 9 -3 5 0.2 0.17
 -9 -3 -5 0.05 0.13
 9 -3 5 0.16 0.18
 -9 3 -5 0.01 0.17
 9 3 5 0.3 0.19
 -9 3 -5 -0.07 0.17
 9 3 5 0.06 0.2
 -10 -3 -5 7.58 0.33
 -10 -3 -5 7.61 0.45
 -10 -3 -5 7.97 0.45
 10 -3 5 7.85 0.59
 10 -3 5 8.17 0.46
 -10 -3 -5 8.13 0.47
 -10 -3 -5 7.83 0.62
 10 -3 5 8.15 0.56
 10 3 5 8.51 0.53
 -10 3 -5 7.85 0.43
 -10 3 -5 8.57 0.49
 10 3 5 7.73 0.66
 11 -3 5 0.25 0.15
 -11 -3 -5 0.22 0.11
 11 -3 5 0.11 0.1
 11 -3 5 0.15 0.11
 -11 -3 -5 0.36 0.13
 -11 3 -5 0.14 0.08
 11 3 5 0.11 0.11
 11 3 5 0.29 0.14
 -11 3 -5 0.37 0.13
 -10 -4 5 0.14 0.15
 10 -4 -5 0.07 0.17
 10 -4 -5 0.24 0.12
 10 -4 -5 0.24 0.15
 -10 -4 5 0.15 0.15
 -10 -4 5 0.08 0.07
 -10 -4 5 0.05 0.08
 -10 4 5 -0.06 0.15
 -10 4 5 0.27 0.16
 -10 4 5 0.02 0.15
 -10 4 5 0.09 0.11
 -10 4 5 -0.07 0.11
 -10 4 5 0.15 0.14
 9 -4 -5 0.63 0.29
 -9 -4 5 0.81 0.23
 -9 -4 5 0.62 0.17
 9 -4 -5 0.65 0.2
 9 -4 -5 0.83 0.25
 9 -4 -5 0.88 0.17
 9 -4 -5 0.75 0.24
 -9 -4 5 0.9 0.22
 -9 -4 5 0.8 0.14
 -9 4 5 1.01 0.25
 -9 4 5 1.06 0.15
 -9 4 5 0.63 0.21
 -9 4 5 1.03 0.24
 -9 4 5 0.92 0.19
 -9 4 5 0.51 0.19
 8 -4 -5 28.57 0.86
 -8 -4 5 27.03 0.83
 -8 -4 5 31.5 1.03
 8 -4 -5 26.77 1.19
 -8 -4 5 27.12 1.02
 8 -4 -5 29.39 1.04
 -8 -4 5 28.48 1.26
 8 -4 -5 28.11 1.16
 -8 4 5 28.26 1.03
 -8 4 5 27.97 1.06
 -8 4 5 27.94 0.87
 -8 4 5 29.19 1.41
 -8 4 5 26.9 1.07
 -8 4 5 29.24 0.97
 -8 4 5 28.74 0.98
 -8 4 5 28.1 1.01
 7 -4 -5 10.3 0.68
 7 -4 -5 9.44 0.43
 -7 -4 5 9.01 0.56
 -7 -4 5 8.72 0.56
 -7 -4 5 9.16 0.62
 7 -4 -5 8.22 0.55
 7 -4 -5 10.3 0.64
 7 -4 -5 10.16 0.58
 7 -4 -5 9.64 0.54
 7 -4 -5 9.99 0.57
 -7 -4 5 10.13 0.55
 -7 -4 5 9.84 0.43
 7 -4 -5 10.17 0.65
 -7 4 5 10.62 0.6
 -7 4 5 9.02 0.52
 -7 4 5 10.29 0.57
 -7 4 5 11.32 0.65
 -7 4 5 8.79 0.58
 -7 4 5 10.14 0.49
 -7 4 5 9.56 0.58
 -7 4 5 10.57 0.81
 6 -4 -5 1.46 0.28
 6 -4 -5 1.74 0.27
 -6 -4 5 1.26 0.28
 6 -4 -5 1.36 0.26
 -6 -4 5 1.37 0.2
 -6 -4 5 1.71 0.14
 -6 -4 5 1.66 0.3
 6 -4 -5 1.58 0.32
 6 -4 -5 1.46 0.26
 6 -4 -5 1.53 0.2
 6 -4 -5 1.4 0.29
 -6 -4 5 1.73 0.3
 -6 -4 5 1.34 0.28
 6 -4 -5 1.24 0.28
 -6 4 5 1.62 0.3
 -6 4 5 1.52 0.25
 -6 4 5 1.59 0.3
 -6 4 5 1.41 0.31
 -6 4 5 2.39 0.35
 -6 4 5 1.18 0.28
 -6 4 5 2.09 0.3
 -6 4 5 1.34 0.28
 5 -4 -5 2.34 0.28
 5 -4 -5 2.18 0.26
 5 -4 -5 2.64 0.32
 5 -4 -5 2.37 0.22
 5 -4 -5 2.44 0.29
 5 -4 -5 2.25 0.32
 5 -4 -5 2.25 0.29
 -5 4 5 2.37 0.29
 -5 4 5 2.58 0.33
 -5 4 5 2.82 0.35
 4 -4 -5 13.84 0.66
 4 -4 -5 13.63 0.6
 4 -4 -5 14.65 0.71
 4 -4 -5 14.66 0.62
 4 -4 -5 14.15 0.49
 4 -4 -5 13.94 0.61
 -4 4 5 15.51 0.67
 -4 4 5 15.6 0.71
 3 -4 -5 23.36 0.88
 3 -4 -5 22.33 0.79
 3 -4 -5 24.27 0.84
 3 -4 -5 21.67 0.79
 3 -4 -5 23.59 0.91
 3 -4 -5 23.96 0.67
 3 4 -5 24.91 0.89
 -3 4 5 24.12 0.85
 -3 4 5 24.46 0.92
 2 -4 -5 1.67 0.23
 2 -4 -5 2.13 0.25
 2 -4 -5 1.88 0.22
 2 -4 -5 2.26 0.23
 2 -4 -5 1.71 0.17
 2 -4 -5 2.06 0.22
 -2 4 5 2.15 0.25
 -2 4 5 1.93 0.21
 1 -4 -5 87.24 2.2
 1 -4 -5 91.66 2.44
 1 -4 -5 88.73 2.5
 1 -4 -5 85.34 2.13
 -1 -4 5 92.21 2.22
 -1 -4 5 89.38 2.15
 1 -4 -5 94.76 2.42
 -1 4 5 97.91 2.61
 -1 4 5 99.15 2.42
 1 4 -5 97.56 2.4
 0 -4 -5 33.8 0.96
 0 -4 5 31.74 0.99
 0 -4 5 33.16 1.06
 0 -4 5 31.94 0.96
 0 4 5 35.24 1.13
 0 4 -5 36.75 1.17
 0 4 -5 35.82 1.05
 0 4 5 35.87 1.01
 1 -4 5 0.3 0.11
 1 -4 5 0.36 0.13
 1 -4 5 0.37 0.14
 -1 4 -5 0.31 0.15
 -1 4 -5 0.36 0.13
 1 4 5 0.48 0.15
 2 -4 5 32.01 1.1
 2 -4 5 30.8 1.04
 2 -4 5 30.92 0.96
 2 -4 5 31.5 0.99
 2 4 5 32.39 1.06
 -2 4 -5 35.19 1.09
 -2 4 -5 34.96 1.15
 3 -4 5 38.38 1.17
 3 -4 5 37.13 1.23
 3 -4 5 37.85 1.13
 3 -4 5 38.65 1.31
 -3 4 -5 44.27 1.38
 -3 4 -5 41.88 1.32
 4 -4 5 32.38 1.07
 4 -4 5 32.57 1.17
 4 -4 5 33.17 1.22
 4 -4 5 30.67 1.13
 4 -4 5 33.23 1.05
 -4 4 -5 36.84 1.23
 -4 4 -5 35.14 1.19
 5 -4 5 34.71 1.09
 5 -4 5 34.2 1.22
 5 -4 5 31.77 1.1
 5 -4 5 32.34 1.27
 5 -4 5 31.9 1.2
 -5 4 -5 35.16 1.22
 6 -4 5 2.37 0.35
 6 -4 5 2.87 0.36
 6 -4 5 3.14 0.35
 6 -4 5 1.96 0.34
 6 -4 5 2.81 0.32
 -6 -4 -5 2.31 0.31
 6 -4 5 2.62 0.24
 -6 -4 -5 2.42 0.37
 -6 -4 -5 2.6 0.33
 6 -4 5 2.64 0.45
 6 -4 5 2.99 0.4
 -6 4 -5 2.4 0.34
 -6 4 -5 2.94 0.3
 -6 4 -5 2.2 0.33
 -6 4 -5 2.62 0.36
 7 -4 5 0.41 0.22
 -7 -4 -5 0.04 0.18
 -7 -4 -5 0.44 0.17
 7 -4 5 0.3 0.2
 -7 -4 -5 0.02 0.16
 7 -4 5 0.26 0.23
 7 -4 5 0.36 0.18
 -7 -4 -5 -0.04 0.19
 -7 -4 -5 0.12 0.19
 -7 -4 -5 0.07 0.16
 7 4 5 0.55 0.26
 -7 4 -5 0.39 0.22
 -7 4 -5 0.23 0.18
 7 4 5 -0.2 0.2
 -7 4 -5 0.12 0.17
 8 -4 5 0.39 0.19
 -8 -4 -5 0.23 0.19
 8 -4 5 0.48 0.26
 8 -4 5 0.43 0.22
 -8 -4 -5 0.68 0.21
 -8 -4 -5 0.46 0.2
 8 -4 5 0.51 0.25
 -8 -4 -5 0.76 0.19
 -8 -4 -5 0.15 0.18
 8 -4 5 0.69 0.26
 -8 4 -5 0.64 0.22
 8 4 5 0.43 0.24
 -8 4 -5 0.4 0.23
 8 4 5 0.82 0.31
 -8 4 -5 0.51 0.16
 -9 -4 -5 3.45 0.28
 9 -4 5 4.09 0.44
 -9 -4 -5 3.46 0.35
 9 -4 5 3.7 0.43
 -9 -4 -5 3.43 0.48
 9 -4 5 3.73 0.34
 9 -4 5 3.75 0.43
 -9 -4 -5 3.65 0.38
 -9 -4 -5 3.48 0.34
 9 4 5 3.04 0.49
 -9 4 -5 4.21 0.39
 -9 4 -5 3.7 0.38
 9 4 5 4.28 0.43
 10 -4 5 0.61 0.2
 -10 -4 -5 0.61 0.17
 10 -4 5 0.49 0.15
 10 -4 5 0.43 0.12
 -10 -4 -5 0.58 0.16
 -10 4 -5 0.37 0.15
 -10 4 -5 0.54 0.18
 -10 4 -5 0.43 0.16
 10 4 5 0.48 0.16
 10 4 5 0.44 0.17
 -10 -5 5 0 0.11
 10 -5 -5 0.05 0.11
 10 -5 -5 -0.04 0.11
 -10 -5 5 0.13 0.11
 -10 -5 5 0.04 0.07
 -10 5 5 0.23 0.12
 -10 5 5 0.04 0.11
 -10 5 5 0.17 0.12
 -10 5 5 0.13 0.11
 9 -5 -5 3.83 0.36
 9 -5 -5 3.48 0.27
 -9 -5 5 3.36 0.34
 -9 -5 5 3.36 0.23
 9 -5 -5 3.91 0.48
 -9 -5 5 3.61 0.37
 -9 -5 5 3.96 0.33
 -9 5 5 3.3 0.33
 -9 5 5 3.98 0.46
 -9 5 5 3.71 0.23
 -9 5 5 3.46 0.31
 -9 5 5 3.38 0.35
 -9 5 5 3.9 0.36
 -8 -5 5 0.34 0.19
 8 -5 -5 0.32 0.23
 8 -5 -5 0.31 0.14
 8 -5 -5 0.37 0.23
 8 -5 -5 0.32 0.17
 -8 -5 5 0.36 0.21
 -8 -5 5 0.36 0.13
 8 -5 -5 0.42 0.23
 8 -5 -5 0.13 0.18
 -8 -5 5 0.31 0.15
 -8 5 5 0.59 0.23
 -8 5 5 0.29 0.18
 -8 5 5 0.13 0.16
 -8 5 5 0.35 0.15
 -8 5 5 0.42 0.19
 -8 5 5 0.28 0.16
 -8 5 5 0.39 0.19
 7 -5 -5 1.18 0.28
 -7 -5 5 0.15 0.21
 -7 -5 5 0.35 0.21
 7 -5 -5 0.55 0.16
 7 -5 -5 1.12 0.22
 7 -5 -5 0.9 0.26
 -7 -5 5 1.08 0.25
 -7 -5 5 0.89 0.17
 7 -5 -5 0.7 0.26
 7 -5 -5 0.83 0.29
 7 -5 -5 0.92 0.29
 7 -5 -5 0.64 0.25
 -7 -5 5 0.61 0.18
 -7 5 5 0.89 0.25
 -7 5 5 1 0.26
 -7 5 5 1.1 0.25
 -7 5 5 0.83 0.24
 -7 5 5 0.83 0.28
 -7 5 5 0.65 0.22
 -7 5 5 0.97 0.21
 -6 -5 5 2.05 0.24
 -6 -5 5 1.84 0.29
 -6 -5 5 2.46 0.17
 6 -5 -5 1.91 0.35
 6 -5 -5 2.04 0.23
 6 -5 -5 3.79 0.72
 -6 -5 5 2.11 0.33
 6 -5 -5 2.11 0.32
 6 -5 -5 2.07 0.3
 -6 -5 5 1.72 0.29
 6 -5 -5 1.97 0.33
 6 -5 -5 2.25 0.4
 6 -5 -5 2.2 0.38
 -6 5 5 1.56 0.34
 -6 5 5 2.32 0.35
 -6 5 5 2.18 0.34
 -6 5 5 2.66 0.38
 -6 5 5 2.06 0.31
 -6 5 5 2.09 0.33
 5 -5 -5 1.78 0.26
 -5 -5 5 2.32 0.24
 -5 -5 5 1.96 0.21
 -5 -5 5 1.88 0.32
 5 -5 -5 2.09 0.31
 -5 -5 5 2.16 0.34
 5 -5 -5 1.77 0.35
 5 -5 -5 2.17 0.31
 5 -5 -5 2.52 0.38
 5 -5 -5 2.24 0.23
 5 -5 -5 2.18 0.33
 4 -5 -5 27.77 1.01
 4 -5 -5 27.7 0.81
 4 -5 -5 26.44 1.04
 4 -5 -5 27.13 0.98
 -4 -5 5 28.35 0.82
 4 -5 -5 30.12 1.15
 4 -5 -5 28.77 0.99
 -4 -5 5 28.21 0.86
 4 -5 -5 27.37 1.09
 -4 5 5 28.86 1.04
 -4 5 5 28.66 0.91
 -4 5 5 30.66 1.07
 -4 5 5 28.23 1.13
 3 -5 -5 11.6 0.56
 3 -5 -5 10.67 0.61
 3 -5 -5 11.04 0.53
 3 -5 -5 10.75 0.43
 3 -5 -5 11.14 0.57
 3 -5 -5 11.91 0.64
 3 5 -5 12.48 0.62
 -3 5 5 10.13 0.61
 -3 5 5 12.42 0.59
 2 -5 -5 30.2 1.1
 2 -5 -5 26.81 1.05
 2 -5 -5 29.85 1.01
 2 -5 -5 29.48 0.81
 2 -5 -5 31.36 0.99
 2 -5 -5 30.79 0.98
 2 5 -5 33.2 1.17
 -2 5 5 34.18 1.08
 -2 5 5 31.15 1.16
 1 -5 -5 0.24 0.13
 1 -5 -5 0.23 0.14
 -1 -5 5 0.02 0.13
 1 -5 -5 0.12 0.1
 -1 -5 5 0.13 0.12
 1 5 -5 0.2 0.14
 -1 5 5 0.28 0.15
 -1 5 5 0.18 0.11
 0 -5 5 0.89 0.19
 0 -5 -5 0.88 0.2
 0 -5 -5 0.98 0.19
 0 -5 5 0.94 0.2
 0 5 5 1.3 0.22
 0 5 -5 1.05 0.23
 0 5 -5 1.33 0.22
 1 -5 5 0.09 0.12
 1 -5 5 0.11 0.18
 1 -5 5 0.01 0.11
 1 -5 5 -0.01 0.14
 -1 5 -5 -0.02 0.14
 1 5 5 0.02 0.11
 -1 5 -5 0 0.11
 2 -5 5 1.66 0.25
 2 -5 5 1.3 0.26
 2 -5 5 1.35 0.25
 2 -5 5 1.34 0.27
 2 -5 5 1.27 0.22
 2 5 5 1.09 0.21
 -2 5 -5 1.08 0.25
 -2 5 -5 1.86 0.25
 3 -5 5 0.6 0.22
 3 -5 5 0.53 0.23
 3 -5 5 0.95 0.26
 3 -5 5 0.8 0.2
 3 -5 5 0.71 0.19
 -3 5 -5 0.74 0.23
 -3 5 -5 0.77 0.21
 4 -5 5 6.68 0.5
 4 -5 5 6.11 0.51
 4 -5 5 6.76 0.48
 4 -5 5 6.91 0.45
 4 -5 5 6.73 0.53
 4 -5 5 5.82 0.49
 -4 5 -5 6.67 0.48
 -4 5 -5 7.89 0.57
 -4 5 -5 6.6 0.46
 -4 5 -5 7.17 0.66
 -5 -5 -5 7.96 1.31
 5 -5 5 8.43 0.59
 5 -5 5 7.46 0.58
 5 -5 5 7.39 0.46
 -5 -5 -5 8.32 0.53
 5 -5 5 8.45 0.55
 -5 -5 -5 7.84 0.49
 5 -5 5 7.53 0.51
 5 -5 5 7.67 0.56
 5 -5 5 7.87 0.59
 -5 -5 -5 7.07 0.48
 5 -5 5 8.04 0.5
 -5 5 -5 7.56 0.53
 5 5 5 8 0.59
 5 5 5 8.35 0.76
 -5 5 -5 7.84 0.48
 -5 5 -5 7.34 0.52
 -5 5 -5 8.3 0.55
 -6 -5 -5 -0.07 0.14
 6 -5 5 0.01 0.23
 6 -5 5 0.13 0.21
 6 -5 5 0.08 0.16
 -6 -5 -5 -0.09 0.14
 -6 -5 -5 0.25 0.17
 6 -5 5 -0.03 0.19
 -6 -5 -5 -0.01 0.19
 6 -5 5 0.17 0.19
 6 -5 5 0 0.15
 6 -5 5 0.12 0.19
 6 -5 5 0.24 0.19
 6 5 5 0.32 0.22
 -6 5 -5 -0.07 0.16
 6 5 5 0.09 0.25
 -6 5 -5 0.33 0.22
 -6 5 -5 0.24 0.15
 -6 5 -5 -0.21 0.19
 -7 -5 -5 -0.08 0.16
 7 -5 5 -0.06 0.21
 7 -5 5 -0.07 0.19
 -7 -5 -5 0.02 0.17
 7 -5 5 0.22 0.17
 -7 -5 -5 0.1 0.15
 7 -5 5 0.44 0.24
 -7 -5 -5 -0.09 0.18
 -7 -5 -5 0.18 0.17
 7 -5 5 -0.02 0.14
 7 -5 5 0.17 0.22
 7 -5 5 0.04 0.22
 -7 -5 -5 0.01 0.19
 7 -5 5 -0.21 0.19
 7 5 5 0.11 0.21
 7 5 5 -0.02 0.18
 -7 5 -5 0 0.19
 -7 5 -5 -0.06 0.19
 -7 5 -5 -0.21 0.15
 8 -5 5 2.19 0.34
 8 -5 5 2.02 0.32
 -8 -5 -5 2.6 0.45
 -8 -5 -5 1.76 0.28
 -8 -5 -5 2.76 0.35
 8 -5 5 2.49 0.28
 8 -5 5 2.43 0.36
 8 -5 5 1.69 0.33
 -8 -5 -5 2.11 0.28
 -8 -5 -5 2.39 0.31
 -8 5 -5 2.28 0.35
 -8 5 -5 2.51 0.37
 8 5 5 2.87 0.38
 -8 5 -5 2.33 0.21
 8 5 5 2.38 0.46
 9 -5 5 0.32 0.18
 -9 -5 -5 0.2 0.14
 -9 -5 -5 0.24 0.15
 -9 -5 -5 0 0.09
 9 -5 5 0.08 0.16
 -9 5 -5 0.02 0.16
 9 5 5 0.02 0.14
 -9 5 -5 0.13 0.15
 9 5 5 0.04 0.15
 10 -5 5 0.93 0.2
 -9 -6 5 1.45 0.21
 9 -6 -5 0.9 0.15
 -9 -6 5 0.97 0.18
 9 -6 -5 1.27 0.25
 -9 -6 5 1.02 0.2
 -9 6 5 1.24 0.19
 -9 6 5 1.24 0.19
 -9 6 5 1.21 0.11
 -9 6 5 1.17 0.18
 -9 6 5 1.21 0.2
 8 -6 -5 0.71 0.17
 -8 -6 5 0.78 0.18
 8 -6 -5 0.4 0.19
 8 -6 -5 0.88 0.25
 -8 -6 5 0.55 0.13
 -8 -6 5 0.49 0.15
 -8 -6 5 0.66 0.19
 -8 6 5 0.58 0.19
 -8 6 5 0.49 0.19
 -8 6 5 0.53 0.15
 -8 6 5 0.55 0.17
 -8 6 5 0.57 0.19
 -7 -6 5 4 0.39
 -7 -6 5 3.5 0.36
 -7 -6 5 4.25 0.43
 7 -6 -5 3.86 0.28
 7 -6 -5 3.64 0.47
 -7 -6 5 2.53 0.91
 7 -6 -5 3.67 0.44
 7 -6 -5 3.85 0.33
 7 -6 -5 3.85 0.41
 7 -6 -5 3.71 0.43
 7 -6 -5 3.64 0.39
 -7 -6 5 3.92 0.29
 -7 6 5 3.81 0.38
 -7 6 5 3.93 0.38
 -7 6 5 3.96 0.34
 -7 6 5 4.25 0.42
 -7 6 5 3.77 0.41
 -6 -6 5 7.22 1.39
 -6 -6 5 8.77 0.25
 6 -6 -5 8.43 0.4
 6 -6 -5 8.88 0.62
 6 -6 -5 7.52 0.53
 6 -6 -5 8.23 0.63
 -6 -6 5 8.35 0.44
 6 -6 -5 7.75 0.54
 6 -6 -5 8.75 0.5
 6 -6 -5 8.66 0.69
 -6 -6 5 8.59 0.63
 -6 -6 5 7.69 0.51
 6 -6 -5 8.43 0.59
 -6 6 5 8.65 0.59
 -6 6 5 8.59 0.54
 -6 6 5 8.28 0.56
 -6 6 5 8.63 0.52
 -6 6 5 8.64 0.58
 -6 6 5 9.29 0.55
 5 -6 -5 6.09 0.55
 -5 -6 5 5.62 0.31
 5 -6 -5 5.77 0.51
 5 -6 -5 5.72 0.6
 -5 -6 5 5.73 0.44
 -5 -6 5 5.27 0.51
 5 -6 -5 6.09 0.34
 -5 -6 5 4.45 1.21
 5 -6 -5 5.83 0.41
 5 -6 -5 5.52 0.44
 5 -6 -5 5.85 0.51
 -5 -6 5 5.94 0.38
 5 -6 -5 5.56 0.47
 -5 6 5 6.18 0.51
 -5 6 5 5.61 0.45
 -5 6 5 6.27 0.47
 -5 6 5 6.06 0.47
 -5 6 5 6.16 0.48
 -5 6 5 5.84 0.37
 -4 -6 5 19.94 0.65
 -4 -6 5 22.11 2.18
 -4 -6 5 20.83 0.76
 -4 -6 5 20.14 0.83
 -4 -6 5 19.69 0.67
 -4 -6 5 20.51 1.07
 4 -6 -5 20.34 0.84
 4 -6 -5 20.59 0.65
 4 -6 -5 19.71 0.95
 4 -6 -5 20.21 1.1
 4 -6 -5 22.17 0.98
 4 -6 -5 19.37 0.9
 4 -6 -5 20.73 0.8
 4 -6 -5 22.26 0.9
 -4 6 5 21.04 0.77
 -4 6 5 20.98 0.86
 -4 6 5 22.53 0.9
 -4 6 5 21.91 0.91
 -4 6 5 21.8 0.9
 -3 -6 5 0.4 0.18
 -3 6 5 -0.06 0.16
 -3 6 5 0.19 0.14
 -3 6 5 0.39 0.2
 -3 6 5 0.44 0.22
 -3 6 5 0.31 0.23
 -3 6 5 0.27 0.17
 -3 6 5 0.26 0.19
 2 -6 -5 6.16 0.38
 2 -6 -5 5.81 0.54
 2 -6 -5 6.94 0.46
 -2 -6 5 6.52 0.44
 2 -6 -5 6.01 0.48
 -2 -6 5 6.49 0.41
 -2 -6 5 6.74 0.49
 2 -6 -5 6.72 0.45
 -2 -6 5 6.55 0.59
 -2 6 5 6.4 0.46
 -2 6 5 6.33 0.47
 -2 6 5 5.35 0.46
 -2 6 5 6.53 0.41
 -2 6 5 6.44 0.51
 2 6 -5 6.31 0.5
 -2 6 5 6 0.43
 -2 6 5 5.7 0.49
 1 -6 -5 0.11 0.16
 -1 -6 5 0.25 0.17
 1 -6 -5 0.04 0.15
 -1 -6 5 0.2 0.15
 -1 -6 5 -0.15 0.12
 -1 -6 5 -0.1 0.17
 1 -6 -5 0.23 0.19
 1 -6 -5 0.29 0.17
 -1 6 5 0.19 0.18
 -1 6 5 0.12 0.15
 -1 6 5 0.17 0.21
 1 6 -5 0.25 0.19
 0 -6 5 0.13 0.16
 0 -6 5 0.28 0.21
 0 -6 5 0.12 0.16
 0 -6 5 0.38 0.16
 0 6 5 0.1 0.17
 0 6 5 0.47 0.23
 0 6 -5 0.16 0.18
 0 6 -5 0.28 0.19
 0 6 5 0.25 0.17
 0 6 5 0.24 0.16
 1 -6 5 2.31 0.35
 1 -6 5 2.18 0.3
 1 -6 5 2.15 0.32
 1 -6 5 2.26 0.33
 -1 6 -5 2 0.44
 1 6 5 2.37 0.31
 1 6 5 2.37 0.36
 -1 6 -5 2.34 0.34
 1 6 5 2.18 0.39
 -1 6 -5 2.43 0.31
 -1 6 -5 1.9 0.27
 1 6 5 2.31 0.33
 2 -6 5 5.37 0.47
 2 -6 5 5.7 0.45
 2 -6 5 4.66 0.35
 2 -6 5 4.92 0.41
 2 -6 5 5.24 0.41
 -2 -6 -5 5.27 0.35
 2 6 5 5.52 0.46
 2 6 5 5.22 0.54
 2 6 5 5.29 0.43
 -2 6 -5 6.47 0.49
 -2 6 -5 5.32 0.44
 -2 6 -5 5.26 0.55
 -2 6 -5 5.03 0.49
 -2 6 -5 5.4 0.43
 3 -6 5 40.95 1.31
 3 -6 5 40.48 1.37
 3 -6 5 42.4 1.53
 -3 -6 -5 39.47 1.29
 3 -6 5 43.04 1.35
 3 -6 5 39.73 1.46
 3 -6 5 41.2 1.19
 -3 -6 -5 38.93 1.05
 -3 -6 -5 49.82 3.09
 -3 6 -5 44.72 1.44
 -3 6 -5 41.1 1.33
 -3 6 -5 41.96 1.31
 -3 6 -5 40.99 1.73
 3 6 5 41.65 1.34
 3 6 5 41.92 1.41
 -3 6 -5 42.18 1.35
 3 6 5 42.69 1.85
 -3 6 -5 41.29 1.53
 4 -6 5 20.4 0.99
 -4 -6 -5 20.65 0.84
 -4 -6 -5 21.2 2.11
 4 -6 5 21.24 0.88
 -4 -6 -5 19.94 0.83
 4 -6 5 21.21 0.79
 4 -6 5 21.31 0.88
 4 -6 5 20.73 0.94
 -4 -6 -5 19.7 0.85
 4 -6 5 19.6 0.88
 4 -6 5 21.23 0.99
 -4 6 -5 19.61 0.86
 4 6 5 22 0.91
 4 6 5 19.88 1.16
 -4 6 -5 22.08 0.94
 -4 6 -5 21.68 0.84
 5 -6 5 2.67 0.41
 5 -6 5 2.52 0.34
 5 -6 5 2.54 0.41
 5 -6 5 2.31 0.34
 5 -6 5 2.87 0.44
 -5 -6 -5 2.19 0.33
 5 -6 5 2.39 0.34
 -5 -6 -5 2.52 0.35
 -5 -6 -5 2.76 0.34
 5 6 5 2 0.37
 -5 6 -5 2.41 0.31
 -5 6 -5 2.92 0.39
 -5 6 -5 2.14 0.33
 5 6 5 2.47 0.47
 -5 6 -5 2.83 0.38
 6 -6 5 0.84 0.25
 6 -6 5 0.94 0.21
 6 -6 5 0.41 0.24
 -6 -6 -5 0.34 0.19
 6 -6 5 0.81 0.25
 6 -6 5 0.66 0.26
 6 -6 5 0.72 0.27
 -6 -6 -5 0.23 0.19
 -6 -6 -5 0.67 0.22
 -6 -6 -5 0.85 0.21
 6 6 5 0.59 0.25
 -6 6 -5 0.65 0.16
 -6 6 -5 0.98 0.27
 6 6 5 0.71 0.23
 -6 6 -5 0.47 0.22
 7 -6 5 4.3 0.36
 -7 -6 -5 4.73 0.35
 7 -6 5 3.66 0.43
 -7 -6 -5 3.79 0.94
 7 -6 5 4.62 0.46
 -7 -6 -5 5.06 0.4
 7 -6 5 3.81 0.41
 -7 -6 -5 4 0.41
 7 6 5 3.99 0.4
 -7 6 -5 3.94 0.32
 7 6 5 4.33 0.51
 -7 6 -5 4.6 0.43
 -8 -6 -5 2.8 0.74
 -8 -6 -5 3.74 0.34
 -8 -6 -5 3.86 0.27
 8 -6 5 3.44 0.32
 -8 -6 -5 3.87 0.33
 8 6 5 3.77 0.35
 8 6 5 3.76 0.44
 -8 6 -5 3.2 0.33
 -9 -6 -5 1.1 0.18
 9 -6 5 0.89 0.16
 9 6 5 0.98 0.18
 9 6 5 0.87 0.18
 9 6 5 0.96 0.16
 -9 6 -5 1.26 0.2
 -9 6 -5 0.96 0.16
 8 -7 -5 0.36 0.11
 -8 -7 5 0.13 0.12
 8 -7 -5 0.56 0.19
 -8 -7 5 0.21 0.13
 -8 -7 5 0.36 0.12
 8 -7 -5 0.51 0.1
 -8 7 5 0.52 0.15
 -8 7 5 0.52 0.11
 -8 7 5 0.51 0.13
 -7 -7 5 0.22 0.15
 7 -7 -5 -0.05 0.16
 7 -7 -5 0 0.1
 7 -7 -5 0.05 0.12
 -7 -7 5 0.08 0.11
 -7 7 5 0.1 0.16
 -7 7 5 0.13 0.13
 -7 7 5 -0.01 0.13
 -7 7 5 -0.05 0.15
 -7 7 5 0.02 0.14
 -6 -7 5 14.64 0.66
 -6 -7 5 14.95 0.85
 6 -7 -5 14.81 0.68
 6 -7 -5 14.63 0.75
 6 -7 -5 14.37 0.6
 -6 -7 5 15.48 1.66
 6 -7 -5 15.01 0.8
 -6 7 5 15.11 0.73
 -6 7 5 14.52 0.7
 -6 7 5 15.94 0.67
 -6 7 5 14.95 0.65
 5 -7 -5 21.65 0.97
 5 -7 -5 21.75 0.87
 -5 -7 5 22.65 0.62
 -5 -7 5 22.07 1.13
 -5 -7 5 22.7 0.87
 5 -7 -5 22.1 1.06
 -5 -7 5 20.57 2.1
 -5 7 5 22.48 0.89
 -5 7 5 22.85 0.91
 -5 7 5 23.4 0.67
 -5 7 5 22.32 0.87
 -5 7 5 22.63 0.87
 -4 -7 5 6.72 0.61
 -4 -7 5 6.3 0.48
 4 -7 -5 6.84 0.49
 -4 -7 5 6.93 0.37
 -4 -7 5 6.14 1.34
 4 -7 -5 6.97 0.5
 4 -7 -5 6.42 0.53
 4 -7 -5 6.83 0.54
 4 -7 -5 6.24 0.51
 -4 7 5 6.54 0.49
 -4 7 5 7 0.42
 -4 7 5 7.05 0.53
 -4 7 5 6.9 0.49
 -4 7 5 7.55 0.51
 -3 -7 5 1.82 0.26
 3 -7 -5 1.39 0.27
 3 -7 -5 1.56 0.28
 -3 -7 5 1.78 0.27
 3 -7 -5 1.47 0.34
 -3 -7 5 1.32 0.27
 3 -7 -5 1.34 0.29
 3 -7 -5 1.7 0.31
 -3 -7 5 0.99 0.4
 -3 -7 5 1.77 0.4
 -3 7 5 1.32 0.28
 -3 7 5 1.83 0.21
 -3 7 5 1.24 0.3
 -3 7 5 1.15 0.28
 -3 7 5 1.57 0.28
 2 -7 -5 26.16 1.09
 2 -7 -5 24.65 0.95
 2 -7 -5 26.05 0.93
 2 -7 -5 24.28 0.99
 2 -7 -5 26.51 1.11
 -2 -7 5 26.5 1.33
 -2 -7 5 26.24 0.89
 -2 -7 5 25.66 0.93
 -2 -7 5 23.51 0.93
 -2 -7 5 24.82 0.78
 -2 7 5 26.96 1.01
 -2 7 5 29.36 1.04
 -2 7 5 26.48 1.02
 -2 7 5 28.35 1.06
 -2 7 5 26.55 0.87
 2 7 -5 28.56 1.46
 2 7 -5 27.79 1.12
 -1 7 5 0.24 0.21
 1 7 -5 0.18 0.23
 1 7 -5 0.27 0.21
 1 7 -5 0.2 0.19
 -1 7 5 -0.12 0.24
 -1 7 5 0.12 0.21
 -1 7 5 0.02 0.17
 -1 7 5 0.1 0.17
 0 -7 5 13.43 0.65
 0 -7 5 14.37 0.74
 0 -7 5 13.44 0.7
 0 -7 5 13.09 0.67
 0 -7 5 14.64 0.78
 0 -7 5 13.41 0.53
 0 -7 -5 13.65 0.6
 0 -7 5 13.27 0.63
 0 7 -5 14.84 0.73
 0 7 -5 14.18 0.73
 0 7 5 16.91 0.78
 0 7 5 15.58 0.72
 0 7 5 15.57 0.75
 0 7 5 14.41 0.67
 0 7 -5 15 0.97
 1 7 5 2.82 0.36
 -1 7 -5 3.2 0.47
 1 7 5 3.71 0.43
 1 7 5 3.12 0.38
 -1 7 -5 3.45 0.38
 1 7 5 2.77 0.38
 1 7 5 3.09 0.41
 -1 7 -5 2.69 0.39
 1 7 5 2.66 0.32
 2 7 5 0.18 0.18
 2 7 5 0.09 0.16
 -2 7 -5 0.35 0.2
 -2 7 -5 0.23 0.16
 2 7 5 0.25 0.22
 2 7 5 0.27 0.2
 -2 7 -5 0.27 0.19
 -2 7 -5 0.19 0.2
 2 7 5 0.24 0.19
 3 -7 5 10.79 0.46
 -3 -7 -5 11.95 1.56
 -3 -7 -5 11.35 0.6
 3 -7 5 10.45 0.68
 3 -7 5 11.72 0.72
 3 -7 5 11.31 0.64
 3 -7 5 11 0.62
 3 -7 5 10.47 0.57
 3 7 5 11.29 0.78
 -3 7 -5 11.52 0.7
 3 7 5 10.89 0.6
 -3 7 -5 11.22 0.63
 -3 7 -5 11.44 0.59
 3 7 5 11.12 0.64
 -3 7 -5 11.05 0.65
 3 7 5 11.87 0.64
 -3 7 -5 11.48 0.55
 4 -7 5 11.35 0.63
 4 -7 5 11.47 0.71
 4 -7 5 11.76 0.5
 -4 -7 -5 12.27 1.57
 4 -7 5 11.35 0.66
 -4 -7 -5 11.22 0.62
 -4 -7 -5 11.84 0.62
 4 -7 5 11.43 0.6
 -4 7 -5 12.3 0.67
 -4 7 -5 12.1 0.7
 4 7 5 12.53 0.63
 -4 7 -5 12.23 0.58
 4 7 5 12.33 0.66
 4 7 5 12.45 0.82
 4 7 5 12.64 0.66
 -5 -7 -5 0.35 0.22
 5 -7 5 0.89 0.25
 -5 -7 -5 0.5 0.21
 5 -7 5 0.62 0.24
 5 -7 5 0.86 0.24
 5 -7 5 1.1 0.26
 -5 -7 -5 0.63 0.2
 5 -7 5 0.97 0.19
 -5 7 -5 0.89 0.25
 -5 7 -5 0.93 0.26
 -5 7 -5 0.9 0.2
 5 7 5 0.93 0.25
 5 7 5 0.91 0.24
 5 7 5 1.01 0.23
 6 -7 5 3.81 0.41
 6 -7 5 3.24 0.39
 -6 -7 -5 3.13 0.87
 6 -7 5 3.63 0.39
 6 -7 5 3.66 0.31
 -6 -7 -5 3.74 0.33
 -6 7 -5 3.88 0.38
 6 7 5 3.94 0.45
 -6 7 -5 3.5 0.33
 6 7 5 3.81 0.36
 6 7 5 4.31 0.37
 7 -7 5 4.62 0.4
 7 -7 5 4.64 0.42
 -7 -7 -5 5.19 0.3
 -7 -7 -5 5.27 0.89
 7 -7 5 5.59 0.3
 -7 7 -5 5.22 0.25
 -7 7 -5 4.74 0.37
 7 7 5 5.5 0.37
 7 7 5 5.11 0.45
 7 7 5 5.21 0.37
 8 -7 5 1.77 0.26
 8 -7 5 2.14 0.18
 -8 7 -5 2.27 0.23
 8 7 5 2.76 0.27
 8 7 5 1.9 0.22
 8 7 5 1.68 0.23
 8 7 5 2.03 0.2
 6 -8 -5 0.08 0.15
 -6 -8 5 -0.05 0.13
 -6 -8 5 0.27 0.13
 6 -8 -5 0.21 0.14
 -6 -8 5 0.28 0.13
 6 8 -5 0.19 0.14
 -6 8 5 0.2 0.15
 6 8 -5 0 0.14
 -6 8 5 0.31 0.14
 -6 8 5 0.12 0.17
 -6 8 5 0.16 0.13
 6 8 -5 0.26 0.14
 -5 -8 5 13.26 0.58
 5 -8 -5 14.29 0.68
 -5 -8 5 13.72 0.79
 -5 -8 5 12.64 1.43
 5 -8 -5 13.76 0.56
 -5 8 5 12.87 0.56
 -5 8 5 14.26 0.6
 5 8 -5 13.98 0.62
 5 8 -5 14.74 0.85
 -5 8 5 14.08 0.61
 -5 8 5 14.38 0.63
 5 8 -5 14.57 0.66
 -4 -8 5 2.3 0.39
 4 -8 -5 3.19 0.32
 -4 -8 5 2.5 0.22
 -4 -8 5 2.69 0.32
 4 -8 -5 2.58 0.35
 4 -8 -5 2.8 0.38
 4 8 -5 2.87 0.35
 4 8 -5 2.83 0.36
 -4 8 5 2.29 0.32
 4 8 -5 2.61 0.45
 -4 8 5 2.99 0.26
 -4 8 5 2.3 0.34
 -4 8 5 2.82 0.34
 -3 -8 5 35.13 0.98
 -3 -8 5 36.31 2.78
 -3 -8 5 34.53 1.57
 3 -8 -5 31.03 1.11
 -3 -8 5 33.8 1.11
 3 -8 -5 32.35 1.24
 3 -8 -5 36.06 1.05
 -3 -8 5 35.78 0.89
 3 8 -5 37.63 1.23
 3 8 -5 38.8 1.69
 -3 8 5 38.5 1.12
 -3 8 5 36.76 1.18
 -3 8 5 36.88 1.18
 3 8 -5 38.56 1.3
 -3 8 5 38.43 1.24
 2 8 -5 0.65 0.2
 -2 8 5 0.8 0.22
 2 8 -5 0.68 0.21
 -2 8 5 0.32 0.2
 -2 8 5 0.48 0.21
 -2 8 5 0.49 0.22
 2 8 -5 0.57 0.22
 -2 8 5 0.6 0.15
 -1 -8 5 8.09 0.4
 -1 -8 5 8.21 0.5
 1 -8 -5 7.15 0.5
 1 -8 -5 7.62 0.41
 -1 -8 5 7.63 0.47
 1 8 -5 7.63 0.5
 1 8 -5 7.93 0.65
 -1 8 5 8.72 0.53
 -1 8 5 8.21 0.54
 -1 8 5 7.85 0.54
 -1 8 5 7.95 0.44
 -1 8 5 8.38 0.53
 1 8 -5 8.15 0.53
 0 -8 5 6.36 0.41
 0 -8 5 5.81 0.47
 0 -8 -5 5.94 0.34
 0 -8 5 6.88 0.47
 0 -8 -5 5.99 0.45
 0 8 -5 7.53 0.48
 0 8 5 6.3 0.43
 0 8 5 6.39 0.48
 0 8 5 6.91 0.5
 0 8 5 6.26 0.48
 0 8 -5 6.19 0.49
 0 8 -5 6.3 0.58
 0 8 5 6.66 0.55
 -1 -8 -5 2.87 0.33
 1 -8 5 2.99 0.38
 1 -8 5 3.15 0.4
 1 -8 5 2.87 0.35
 1 -8 5 2.39 0.41
 1 -8 5 2.96 0.42
 1 -8 5 3.43 0.26
 -1 8 -5 3.62 0.4
 -1 8 -5 3.39 0.33
 1 8 5 3.67 0.39
 1 8 5 3.25 0.41
 1 8 5 3.28 0.36
 -1 8 -5 3.34 0.42
 1 8 5 2.26 0.34
 2 -8 5 10.88 0.67
 2 -8 5 11.66 0.5
 2 -8 5 12.07 0.6
 2 -8 5 10.73 0.6
 2 -8 5 10.84 0.67
 -2 -8 -5 11.95 0.5
 2 -8 5 10.17 0.62
 2 8 5 12.26 0.62
 -2 8 -5 12.94 0.66
 2 8 5 13.14 0.65
 2 8 5 12.89 0.64
 -2 8 -5 11.32 0.58
 2 8 5 12.24 0.64
 3 -8 5 3.52 0.32
 3 -8 5 3.93 0.43
 -3 -8 -5 3.53 0.23
 -3 -8 -5 3.52 0.38
 3 -8 5 3.63 0.4
 3 -8 5 3 0.43
 3 -8 5 2.9 0.36
 -3 -8 -5 3.64 1.11
 3 8 5 3.12 0.39
 3 8 5 3.3 0.37
 -3 8 -5 3.3 0.38
 -3 8 -5 3.23 0.33
 3 8 5 3.54 0.38
 3 8 5 3.88 0.38
 3 8 5 3.87 0.3
 3 8 5 3.48 0.38
 -4 -8 -5 2.54 0.32
 4 -8 5 2.32 0.29
 4 -8 5 1.83 0.3
 4 -8 5 1.2 0.26
 4 -8 5 2.02 0.31
 4 8 5 1.75 0.28
 -4 8 -5 2.24 0.34
 4 8 5 2.04 0.25
 4 8 5 2.2 0.33
 4 8 5 1.81 0.3
 4 8 5 1.54 0.26
 -4 8 -5 2.55 0.36
 4 8 5 2.23 0.32
 -4 8 -5 2.49 0.26
 5 -8 5 1.08 0.27
 5 -8 5 0.89 0.19
 5 -8 5 0.81 0.23
 -5 -8 -5 1.08 0.2
 5 8 5 0.9 0.2
 -5 8 -5 0.84 0.2
 5 8 5 0.63 0.16
 -5 8 -5 1.03 0.22
 5 8 5 0.88 0.2
 5 8 5 1.18 0.2
 6 -8 5 0.77 0.16
 -6 -8 -5 0.15 0.13
 -6 -8 -5 0.33 0.11
 6 8 5 0.36 0.1
 6 8 5 0.84 0.18
 6 8 5 0.51 0.13
 -6 8 -5 0.78 0.13
 -6 8 -5 0.66 0.17
 6 8 5 0.51 0.15
 4 -9 -5 2.81 0.29
 4 -9 -5 2.85 0.18
 -4 -9 5 2.78 0.68
 4 9 -5 2.84 0.26
 4 9 -5 2.98 0.32
 4 9 -5 3.64 0.29
 -4 9 5 3.12 0.26
 3 -9 -5 -0.02 0.16
 -3 -9 5 0.25 0.09
 3 -9 -5 0.22 0.09
 -3 -9 5 0.03 0.17
 -3 9 5 0.25 0.15
 -3 9 5 0.22 0.13
 -3 9 5 0.19 0.1
 3 9 -5 0.21 0.15
 3 9 -5 0.17 0.13
 3 9 -5 0.17 0.13
 2 -9 -5 30.14 0.91
 -2 -9 5 30.14 0.83
 -2 9 5 31.77 0.94
 2 9 -5 32.03 1
 -2 9 5 30.17 0.97
 2 9 -5 31.12 1.3
 -2 9 5 33.28 0.97
 -2 9 5 31.46 0.91
 2 9 -5 31.51 1.01
 -1 -9 5 6.27 0.35
 1 -9 -5 6.67 0.38
 -1 -9 5 6.23 0.33
 1 9 -5 6.28 0.43
 -1 9 5 6.86 0.41
 -1 9 5 6.99 0.42
 -1 9 5 6.03 0.41
 -1 9 5 6.5 0.41
 1 9 -5 6.44 0.36
 -1 9 5 6.09 0.25
 1 9 -5 6.17 0.46
 0 -9 5 4.24 0.34
 0 -9 -5 4.15 0.29
 0 -9 5 4.11 0.23
 0 -9 -5 3.94 0.43
 0 -9 5 3.76 0.31
 0 9 -5 3.58 0.34
 0 9 -5 3.63 0.32
 0 9 -5 3.78 0.25
 0 9 5 4.02 0.34
 0 9 5 3.27 0.34
 0 9 5 4.11 0.38
 0 9 5 3.99 0.33
 0 9 -5 4.01 0.35
 0 9 5 3.76 0.26
 1 -9 5 4.11 0.35
 1 -9 5 3.9 0.28
 -1 -9 -5 4.38 0.42
 1 -9 5 4.19 0.35
 -1 -9 -5 4.17 0.24
 -1 9 -5 4.04 0.36
 1 9 5 5.27 0.43
 1 9 5 3.71 0.29
 1 9 5 4.27 0.35
 -1 9 -5 4.67 0.33
 1 9 5 4.75 0.36
 1 9 5 4.05 0.35
 2 -9 5 15.19 0.76
 -2 -9 -5 16.04 0.67
 2 -9 5 14.81 0.55
 2 -9 5 15.66 0.66
 -2 9 -5 15.77 0.65
 2 9 5 16.34 0.59
 2 9 5 16.45 0.63
 -2 9 -5 16.96 0.6
 2 9 5 16.67 0.64
 3 -9 5 8.67 0.49
 -3 -9 -5 8.22 0.42
 -3 -9 -5 9.13 1.1
 3 -9 5 8.34 0.4
 -3 -9 -5 7.95 0.42
 -3 9 -5 8.72 0.36
 3 9 5 9.32 0.44
 -3 9 -5 8.72 0.46
 -3 9 -5 7.6 0.45
 3 9 5 8.84 0.41
 3 9 5 9.16 0.44
 4 -9 5 8.17 0.38
 4 -9 5 8.07 0.47
 -4 -9 -5 7.7 0.36
 -4 -9 -5 8.18 0.99
 -4 -9 -5 8.3 0.31
 4 9 5 8.98 0.4
 4 9 5 8.22 0.38
 -4 9 -5 8.42 0.4
 -4 9 -5 8.48 0.41
 4 9 5 9.15 0.41
 -11 0 6 0.03 0.09
 -11 0 6 0.28 0.16
 -11 0 6 0.03 0.15
 -11 0 6 0.22 0.15
 -11 0 6 0.07 0.07
 -10 0 6 6.08 0.46
 -10 0 6 5.93 0.48
 -10 0 6 6.18 0.32
 -10 0 6 7.31 0.49
 -10 0 6 6.34 0.49
 -9 0 6 266.06 5.79
 -9 0 6 260.97 8.39
 -9 0 6 257.25 5.56
 -9 0 6 256.42 5.74
 -9 0 6 263.44 5.75
 -8 0 6 221.36 7.15
 -8 0 6 226.07 4.97
 -8 0 6 212.52 4.98
 -8 0 6 222.1 4.76
 -8 0 6 220.47 4.95
 8 0 -6 227.63 5.6
 7 0 -6 15.62 0.62
 7 0 -6 16.67 0.58
 -7 0 6 14.69 0.76
 6 0 -6 22.02 0.65
 6 0 -6 22.41 0.87
 6 0 -6 23.29 0.73
 -5 0 6 1.76 0.23
 5 0 -6 1.98 0.13
 -4 0 6 7.82 0.4
 -3 0 6 0.24 0.1
 -2 0 6 35.26 0.99
 0 0 -6 360.47 8.89
 -1 0 -6 145.51 3.69
 -2 0 -6 248.19 6.23
 3 0 6 70.76 1.91
 -3 0 -6 70.75 1.94
 4 0 6 63.03 1.77
 5 0 6 3.48 0.3
 5 0 6 3.05 0.22
 5 0 6 3.19 0.29
 6 0 6 0.32 0.13
 7 0 6 71.07 1.72
 7 0 6 72.29 2.12
 -7 0 -6 72.14 1.78
 -8 0 -6 19.25 0.62
 -8 0 -6 21.99 0.88
 8 0 6 22.89 1.27
 -8 0 -6 26.57 1.2
 8 0 6 21.93 0.73
 8 0 6 20.86 0.96
 -8 0 -6 21.94 0.86
 -8 0 -6 20.5 0.84
 9 0 6 0.45 0.26
 -9 0 -6 0.41 0.21
 -9 0 -6 0.77 0.24
 9 0 6 0.61 0.22
 -9 0 -6 0.58 0.19
 9 0 6 0.37 0.23
 10 0 6 8.23 0.7
 10 0 6 8.37 0.6
 -10 0 -6 8.49 0.46
 -10 0 -6 7.85 0.5
 10 0 6 8.62 0.54
 11 0 6 2.33 0.29
 11 0 6 2.37 0.37
 -11 0 -6 2.27 0.19
 11 0 6 2.11 0.35
 -11 0 -6 2.47 0.3
 -11 0 -6 2.44 0.28
 -11 -1 6 10.22 0.58
 -11 -1 6 9.72 0.5
 -11 -1 6 10.41 0.52
 -11 -1 6 9.54 0.31
 -11 -1 6 10.67 0.51
 -11 1 6 9.57 0.37
 -11 1 6 10.3 0.52
 -11 1 6 10.02 0.52
 -11 1 6 10.56 0.5
 -11 1 6 9.29 0.59
 -10 -1 6 5.72 0.46
 -10 -1 6 5.73 0.46
 -10 -1 6 6.15 0.3
 -10 -1 6 6.21 0.45
 -10 -1 6 6.19 0.47
 -10 1 6 6.71 0.48
 -10 1 6 6.07 0.47
 -10 1 6 5.72 0.5
 -10 1 6 6.03 0.34
 -10 1 6 6.33 0.47
 -9 -1 6 16.87 0.57
 -9 -1 6 16.41 0.77
 -9 -1 6 17.65 0.77
 -9 -1 6 16.68 0.86
 -9 -1 6 15.79 0.75
 -9 1 6 17.65 0.63
 -9 1 6 18.2 0.82
 -9 1 6 16.27 0.79
 -9 1 6 16.71 0.9
 -9 1 6 17.89 0.78
 -8 -1 6 31.61 1.12
 -8 -1 6 30.7 0.86
 -8 -1 6 30.61 1.08
 -8 -1 6 32.48 1.29
 8 -1 -6 31.22 1.06
 -8 -1 6 29.64 1.06
 -8 1 6 32.13 1.1
 -8 1 6 31.21 1.11
 -8 1 6 32.29 1.13
 -8 1 6 29.57 1.32
 -8 1 6 30.19 0.9
 -8 1 6 32.78 1.11
 7 -1 -6 46.61 1.58
 7 -1 -6 46.33 1.45
 7 -1 -6 47.14 1.37
 7 1 -6 44.94 1.23
 -7 1 6 42.23 1.42
 7 1 -6 42.81 1.29
 -7 1 6 42.69 1.34
 6 -1 -6 -0.03 0.12
 6 -1 -6 0.02 0.07
 6 -1 -6 0.02 0.08
 6 1 -6 0.09 0.06
 -6 1 6 0.04 0.09
 5 -1 -6 41.64 1.18
 5 -1 -6 40.99 1.11
 -5 1 6 40.88 1.33
 5 1 -6 41.04 1.06
 -5 1 6 41.29 1.19
 -4 -1 6 3.03 0.25
 4 -1 -6 3.37 0.18
 -4 1 6 3.05 0.24
 -4 1 6 3.41 0.24
 -4 1 6 2.64 0.25
 -3 -1 6 0.15 0.1
 3 -1 -6 0.1 0.05
 -3 1 6 -0.02 0.1
 -3 1 6 0.01 0.08
 -3 1 6 0.21 0.1
 2 -1 -6 11.15 0.36
 -2 1 6 10.39 0.44
 -2 1 6 10.46 0.39
 -2 1 6 11.46 0.43
 1 -1 -6 24.06 0.69
 -1 1 6 25.96 0.76
 -1 1 6 24.9 0.71
 0 -1 -6 307.82 7.63
 0 1 6 346.63 8.08
 -1 -1 -6 0.73 0.13
 -1 1 -6 0.87 0.13
 1 1 6 0.86 0.11
 2 -1 6 -0.01 0.09
 -2 -1 -6 -0.07 0.07
 2 -1 6 -0.07 0.07
 -2 1 -6 -0.05 0.08
 2 1 6 0.03 0.06
 3 -1 6 18.03 0.66
 3 -1 6 17.22 0.66
 -3 1 -6 18.15 0.67
 -3 1 -6 19.28 0.62
 4 -1 6 24.64 0.91
 4 -1 6 24.7 0.87
 4 -1 6 24.1 0.87
 -4 1 -6 26.36 0.82
 5 -1 6 6.86 0.43
 5 -1 6 6.03 0.29
 5 -1 6 5.65 0.4
 5 -1 6 6.03 0.41
 -5 1 -6 5.58 0.34
 5 1 6 6.3 0.31
 6 -1 6 1.36 0.26
 6 -1 6 1.45 0.18
 6 -1 6 1.38 0.25
 6 1 6 1.33 0.19
 7 -1 6 20.63 0.88
 7 -1 6 21.79 0.92
 -7 -1 -6 19.4 0.67
 7 -1 6 19.76 0.67
 -7 1 -6 20.36 0.73
 -7 1 -6 19.42 0.82
 7 1 6 20.65 0.91
 -8 -1 -6 1.39 0.28
 -8 -1 -6 1.26 0.26
 -8 -1 -6 1.4 0.26
 8 -1 6 0.88 0.25
 8 -1 6 1.34 0.31
 8 -1 6 1.25 0.33
 8 -1 6 1.51 0.23
 -8 -1 -6 1.11 0.25
 -8 1 -6 1.28 0.27
 -8 1 -6 1.49 0.22
 -8 1 -6 0.91 0.27
 8 1 6 1.08 0.29
 8 1 6 2.35 0.49
 8 1 6 1.19 0.3
 -9 -1 -6 38.16 1.21
 9 -1 6 38.85 1.79
 9 -1 6 39.04 1.4
 -9 -1 -6 38.4 1.24
 -9 -1 -6 40.12 1.75
 -9 -1 -6 38.11 1.24
 -9 -1 -6 37.9 1.22
 -9 -1 -6 37.52 1.16
 9 -1 6 38.08 1.36
 9 1 6 38.2 1.8
 -9 1 -6 37.2 1.24
 9 1 6 38.4 1.38
 -9 1 -6 37.85 1.19
 10 -1 6 0.25 0.22
 10 -1 6 0.07 0.15
 -10 -1 -6 0.32 0.15
 10 -1 6 0.08 0.18
 -10 -1 -6 0.21 0.18
 -10 -1 -6 0.1 0.16
 -10 -1 -6 0.24 0.17
 10 1 6 -0.05 0.16
 -10 1 -6 0.34 0.18
 -10 1 -6 0.17 0.15
 10 1 6 0.02 0.19
 11 -1 6 9.95 0.49
 -11 -1 -6 10.52 0.49
 11 -1 6 9.6 0.62
 -11 -1 -6 10.42 0.32
 11 -1 6 10.57 0.55
 11 1 6 10.15 0.66
 11 1 6 10.28 0.51
 -11 1 -6 10.53 0.48
 -11 1 -6 10.34 0.39
 -11 -2 6 2.19 0.29
 -11 -2 6 2.55 0.28
 -11 -2 6 2.71 0.29
 -11 -2 6 2.57 0.27
 -11 2 6 2.41 0.29
 -11 2 6 2.87 0.29
 -11 2 6 2.64 0.28
 -11 2 6 2.54 0.21
 -11 2 6 2.47 0.3
 -10 -2 6 -0.04 0.09
 -10 -2 6 -0.2 0.15
 -10 -2 6 0.11 0.16
 -10 -2 6 0.05 0.08
 -10 -2 6 -0.05 0.16
 10 -2 -6 0 0.12
 10 -2 -6 0 0.17
 -10 2 6 -0.01 0.11
 -10 2 6 -0.24 0.16
 -10 2 6 -0.02 0.1
 -10 2 6 -0.15 0.17
 -10 2 6 -0.01 0.15
 -9 -2 6 2.76 0.22
 -9 -2 6 2.8 0.39
 -9 -2 6 2.62 0.36
 -9 -2 6 2.88 0.38
 -9 -2 6 2.66 0.33
 9 -2 -6 1.9 0.34
 9 -2 -6 2.48 0.28
 -9 2 6 2.65 0.39
 -9 2 6 2.12 0.24
 -9 2 6 2.28 0.37
 -9 2 6 2.47 0.37
 -9 2 6 2.87 0.37
 -9 2 6 2.2 0.34
 -8 -2 6 1.58 0.3
 8 -2 -6 1.96 0.33
 8 -2 -6 1.65 0.27
 -8 -2 6 1.45 0.27
 -8 -2 6 1.27 0.28
 -8 -2 6 1.53 0.18
 -8 -2 6 1.26 0.25
 8 -2 -6 1.39 0.31
 -8 2 6 1.69 0.31
 -8 2 6 1.72 0.3
 -8 2 6 1.51 0.18
 -8 2 6 1.51 0.29
 -8 2 6 1.39 0.32
 -8 2 6 1.63 0.22
 -7 -2 6 0.96 0.24
 7 -2 -6 0.5 0.17
 7 -2 -6 0.77 0.26
 7 -2 -6 0.75 0.2
 -7 2 6 0.69 0.17
 -7 2 6 0.85 0.23
 -7 2 6 0.73 0.15
 -7 2 6 0.55 0.18
 -7 2 6 1.25 0.29
 -7 2 6 0.73 0.21
 -7 2 6 0.67 0.22
 -7 2 6 1.16 0.2
 -7 2 6 0.39 0.19
 6 -2 -6 11.53 0.54
 6 -2 -6 11.57 0.55
 6 -2 -6 11.02 0.53
 6 -2 -6 12.75 0.66
 6 -2 -6 11.81 0.5
 -6 2 6 11.49 0.56
 5 -2 -6 3.78 0.24
 5 -2 -6 3.64 0.27
 5 -2 -6 3.83 0.33
 5 -2 -6 3.97 0.29
 -5 2 6 3.58 0.29
 5 2 -6 3.62 0.19
 -5 2 6 3.99 0.31
 4 -2 -6 2.02 0.17
 4 -2 -6 1.65 0.17
 -4 2 6 1.97 0.23
 -4 2 6 1.79 0.24
 -4 2 6 1.98 0.21
 4 2 -6 1.72 0.1
 3 -2 -6 45.21 1.27
 3 -2 -6 44.52 1.21
 3 2 -6 44.33 1.14
 -3 2 6 44.94 1.23
 -3 2 6 43.37 1.36
 -3 2 6 47.4 1.31
 2 -2 -6 0.5 0.1
 2 -2 -6 0.42 0.1
 -2 2 6 0.42 0.12
 2 2 -6 0.3 0.06
 -2 2 6 0.39 0.12
 -2 2 6 0.41 0.11
 1 -2 -6 32.72 0.96
 -1 2 6 33.25 0.97
 -1 2 6 31.49 0.97
 -1 2 6 32.52 0.89
 0 -2 6 91.65 2.44
 0 -2 -6 95.16 2.46
 0 2 6 97.43 2.3
 0 2 6 98.92 2.45
 1 -2 6 1.37 0.18
 -1 -2 -6 1.34 0.15
 -1 -2 -6 1.34 0.16
 1 2 6 1.5 0.15
 2 -2 6 2.56 0.23
 -2 -2 -6 2.66 0.23
 2 -2 6 2.86 0.25
 -2 2 -6 2.79 0.23
 2 2 6 2.7 0.19
 -2 2 -6 2.84 0.23
 3 -2 6 1.29 0.19
 3 -2 6 1.36 0.2
 -3 2 -6 1.65 0.19
 4 -2 6 7.97 0.45
 4 -2 6 7.34 0.39
 4 -2 6 8.23 0.39
 4 -2 6 8.05 0.46
 -4 2 -6 8.28 0.42
 5 -2 6 0.25 0.15
 5 -2 6 0.13 0.13
 5 -2 6 0.2 0.11
 -5 2 -6 0.32 0.14
 6 -2 6 0.18 0.15
 6 -2 6 0.37 0.17
 6 -2 6 0.33 0.13
 -6 2 -6 0.22 0.14
 -7 -2 -6 0.04 0.17
 -7 -2 -6 0.06 0.16
 7 -2 6 -0.18 0.17
 7 -2 6 0.06 0.13
 7 -2 6 -0.02 0.15
 7 -2 6 -0.03 0.21
 7 -2 6 0.13 0.18
 -7 -2 -6 0.04 0.17
 -7 2 -6 -0.1 0.11
 -7 2 -6 0.13 0.19
 -7 2 -6 0.22 0.18
 -8 -2 -6 77.06 1.99
 -8 -2 -6 77.32 2.04
 8 -2 6 76.73 2.29
 -8 -2 -6 80.98 3
 -8 -2 -6 76.88 2.08
 -8 -2 -6 78.04 2.05
 8 -2 6 77.5 2.3
 8 -2 6 78.15 2.32
 8 -2 6 76.51 3
 -8 -2 -6 76.44 2.06
 8 -2 6 76.85 1.85
 -8 2 -6 75.7 1.88
 -8 2 -6 74.31 2.05
 -8 2 -6 79.03 2.13
 8 2 6 81.8 2.4
 8 2 6 79.88 3.12
 -9 -2 -6 5.41 0.56
 9 -2 6 4 0.46
 -9 -2 -6 3.97 0.39
 -9 -2 -6 3.81 0.42
 9 -2 6 4.86 0.43
 -9 -2 -6 4.91 0.41
 9 -2 6 4.73 0.55
 -9 -2 -6 4.77 0.37
 9 2 6 4.55 0.48
 -9 2 -6 4.14 0.41
 9 2 6 4.36 0.58
 -9 2 -6 4.18 0.42
 -9 2 -6 4.79 0.43
 10 -2 6 9.85 0.62
 10 -2 6 10.29 0.69
 -10 -2 -6 10.13 0.44
 10 -2 6 10.33 0.55
 -10 -2 -6 10.37 0.54
 -10 -2 -6 9.15 0.51
 -10 -2 -6 9.79 0.51
 -10 2 -6 9.8 0.54
 -10 2 -6 10.57 0.51
 10 2 6 10.27 0.59
 10 2 6 10.37 0.76
 11 -2 6 1.31 0.27
 -11 -2 -6 1.89 0.23
 -11 -2 -6 1.86 0.23
 11 -2 6 1.15 0.22
 11 -2 6 1.7 0.21
 11 2 6 1.5 0.23
 -11 2 -6 1.86 0.24
 -11 2 -6 1.48 0.18
 11 2 6 1.55 0.3
 -11 -3 6 0.02 0.07
 -11 -3 6 0.06 0.11
 11 -3 -6 -0.09 0.13
 11 -3 -6 0.08 0.14
 -11 -3 6 0.22 0.13
 -11 3 6 0.01 0.08
 -11 3 6 0.03 0.11
 -11 3 6 -0.13 0.07
 -11 3 6 -0.05 0.11
 -11 3 6 0.08 0.12
 10 -3 -6 0.29 0.13
 -10 -3 6 0.19 0.08
 -10 -3 6 0.46 0.19
 -10 -3 6 0.63 0.2
 10 -3 -6 0.34 0.16
 -10 -3 6 0.27 0.12
 -10 3 6 0.3 0.17
 -10 3 6 0.02 0.16
 -10 3 6 0.25 0.13
 -10 3 6 0.22 0.18
 -10 3 6 0.23 0.13
 -9 -3 6 0.53 0.22
 9 -3 -6 0.36 0.22
 -9 -3 6 0.63 0.22
 9 -3 -6 0.47 0.16
 -9 -3 6 0.13 0.2
 -9 -3 6 0.4 0.15
 -9 -3 6 0.48 0.12
 9 -3 -6 0.3 0.19
 -9 3 6 0.51 0.2
 -9 3 6 0.25 0.15
 -9 3 6 0.39 0.08
 -9 3 6 0.33 0.14
 -9 3 6 0.32 0.2
 -9 3 6 0.68 0.24
 8 -3 -6 2.71 0.42
 8 -3 -6 2.09 0.38
 8 -3 -6 2.16 0.33
 -8 -3 6 1.86 0.2
 -8 -3 6 1.91 0.3
 -8 -3 6 2.75 0.37
 -8 -3 6 2.4 0.35
 8 -3 -6 2.44 0.26
 -8 -3 6 2.23 0.33
 -8 3 6 1.62 0.25
 -8 3 6 2.16 0.35
 -8 3 6 1.97 0.37
 -8 3 6 2.77 0.35
 -8 3 6 2.43 0.38
 -8 3 6 2.28 0.34
 -8 3 6 1.96 0.23
 -7 -3 6 2.13 0.32
 -7 -3 6 2.61 0.35
 -7 -3 6 2.24 0.34
 -7 -3 6 2.13 0.3
 7 -3 -6 2.3 0.35
 7 -3 -6 2.46 0.33
 7 -3 -6 2.27 0.36
 -7 -3 6 2.34 0.21
 7 -3 -6 2.28 0.32
 7 -3 -6 2.19 0.25
 7 -3 -6 2.03 0.28
 -7 3 6 2.42 0.31
 -7 3 6 2.22 0.37
 -7 3 6 2.54 0.26
 -7 3 6 2.18 0.34
 -7 3 6 2.71 0.33
 -7 3 6 2.14 0.36
 -7 3 6 2.29 0.27
 -7 3 6 2.13 0.33
 -7 3 6 2.08 0.33
 6 -3 -6 0.4 0.16
 6 -3 -6 0.35 0.13
 6 -3 -6 0.2 0.2
 6 -3 -6 0.18 0.15
 6 -3 -6 0.53 0.17
 6 -3 -6 -0.03 0.12
 -6 3 6 0.23 0.18
 -6 3 6 0.3 0.17
 -6 3 6 0.32 0.24
 5 -3 -6 33.69 1.2
 5 -3 -6 30.35 1.02
 5 -3 -6 30.68 0.85
 5 -3 -6 32.38 1.04
 5 -3 -6 32.71 1.11
 5 -3 -6 32.67 1.02
 -5 3 6 35.34 1.14
 -5 3 6 34 1.17
 4 -3 -6 15.96 0.71
 4 -3 -6 16.95 0.65
 4 -3 -6 16.1 0.61
 4 -3 -6 16.52 0.66
 -4 3 6 18.83 0.74
 -4 3 6 18.01 0.7
 3 -3 -6 5.22 0.32
 3 -3 -6 5.02 0.31
 3 -3 -6 5.36 0.3
 -3 3 6 5.15 0.37
 -3 3 6 5.63 0.33
 -3 3 6 5.44 0.35
 -2 -3 6 24.41 0.78
 2 -3 -6 26.12 0.81
 2 -3 -6 26.1 0.86
 -2 3 6 25.9 0.87
 -2 3 6 24.68 0.88
 -2 3 6 25.39 0.8
 -1 -3 6 30.94 0.95
 1 -3 -6 33.32 1
 1 -3 -6 34.59 1.05
 -1 -3 6 33.97 1.03
 -1 3 6 35.84 1.11
 -1 3 6 36.28 1.11
 -1 3 6 36.04 1.01
 0 -3 -6 2.63 0.21
 0 -3 -6 3.06 0.24
 0 -3 6 2.54 0.23
 0 -3 6 2.36 0.22
 0 3 6 2.71 0.19
 0 3 6 2.45 0.21
 0 3 6 2.24 0.22
 -1 -3 -6 2.39 0.2
 1 -3 6 2.38 0.24
 1 -3 6 2.56 0.23
 -1 -3 -6 2.35 0.23
 -1 3 -6 2.24 0.22
 1 3 6 2.55 0.21
 2 -3 6 6.4 0.39
 2 -3 6 5.79 0.33
 2 -3 6 6.28 0.35
 2 -3 6 6.5 0.43
 2 3 6 6.81 0.34
 -2 3 -6 6.47 0.38
 -2 3 -6 6.01 0.36
 3 -3 6 3.31 0.27
 3 -3 6 3.59 0.33
 3 -3 6 3.69 0.27
 3 -3 6 3.57 0.32
 -3 3 -6 3.97 0.3
 -3 3 -6 3.83 0.3
 4 -3 6 0.03 0.09
 4 -3 6 -0.1 0.11
 4 -3 6 0.07 0.1
 4 -3 6 0.09 0.11
 4 -3 6 0.03 0.12
 -4 3 -6 0.17 0.13
 -4 3 -6 0.16 0.12
 5 -3 6 3.93 0.33
 5 -3 6 3.61 0.38
 5 -3 6 3.72 0.25
 5 -3 6 3.57 0.31
 5 -3 6 4.01 0.38
 5 -3 6 3.89 0.36
 -5 3 -6 4.35 0.35
 6 -3 6 6.8 0.53
 6 -3 6 6.64 0.34
 6 -3 6 7.64 0.65
 6 -3 6 6.38 0.49
 -6 3 -6 7.73 0.5
 -6 3 -6 7.31 0.53
 7 -3 6 0.46 0.23
 7 -3 6 0.31 0.2
 -7 -3 -6 0.49 0.22
 7 -3 6 0.38 0.15
 7 -3 6 0.39 0.22
 -7 -3 -6 0.59 0.19
 7 -3 6 0.26 0.18
 7 3 6 0.26 0.24
 -7 3 -6 0.26 0.2
 -7 3 -6 0.5 0.24
 -7 3 -6 0.6 0.14
 -7 3 -6 0.52 0.2
 8 -3 6 0.23 0.24
 8 -3 6 0.48 0.16
 -8 -3 -6 0.64 0.24
 8 -3 6 0.37 0.24
 -8 -3 -6 0.5 0.21
 8 -3 6 0.52 0.2
 8 -3 6 0.63 0.24
 8 -3 6 0.53 0.24
 -8 -3 -6 0.63 0.22
 -8 -3 -6 0.13 0.16
 -8 -3 -6 0.53 0.22
 -8 3 -6 0.52 0.16
 -8 3 -6 0.44 0.23
 8 3 6 0.57 0.27
 8 3 6 0.67 0.25
 -8 3 -6 0.9 0.25
 -9 -3 -6 0.02 0.15
 -9 -3 -6 0.17 0.15
 -9 -3 -6 0.2 0.18
 9 -3 6 0.16 0.2
 9 -3 6 -0.08 0.19
 -9 -3 -6 0.16 0.18
 9 -3 6 -0.03 0.13
 9 -3 6 0.04 0.16
 -9 -3 -6 -0.03 0.13
 9 3 6 -0.16 0.18
 9 3 6 -0.13 0.16
 -9 3 -6 0.02 0.18
 -9 3 -6 0.42 0.21
 -10 -3 -6 1.58 0.25
 10 -3 6 1.67 0.32
 -10 -3 -6 1.41 0.23
 10 -3 6 1.04 0.24
 -10 -3 -6 1.59 0.19
 10 -3 6 1.63 0.26
 -10 3 -6 1.71 0.24
 10 3 6 2.03 0.31
 10 3 6 2.03 0.4
 -10 3 -6 2.29 0.31
 11 -3 6 0.1 0.14
 11 -3 6 -0.16 0.15
 -11 -3 -6 0.1 0.11
 11 3 6 0.11 0.1
 -11 3 -6 -0.01 0.11
 10 -4 -6 17.09 0.92
 -10 -4 6 17.49 0.64
 10 -4 -6 17.42 0.71
 -10 -4 6 17.44 0.8
 -10 -4 6 16.69 0.66
 10 -4 -6 16.42 0.56
 -10 -4 6 16.57 0.43
 -10 4 6 16.95 0.66
 -10 4 6 17.56 0.89
 -10 4 6 17.1 0.59
 -10 4 6 16.58 0.64
 -10 4 6 16.8 0.65
 -9 -4 6 20.89 0.78
 -9 -4 6 19.44 0.93
 -9 -4 6 19.56 0.79
 -9 -4 6 19.58 0.59
 9 -4 -6 17.7 0.63
 9 -4 -6 20.07 0.8
 9 -4 -6 19.5 0.91
 -9 4 6 19.03 0.78
 -9 4 6 20.42 0.78
 -9 4 6 19.35 0.7
 -9 4 6 18.99 0.8
 -9 4 6 19.68 0.53
 -9 4 6 19.61 1.03
 8 -4 -6 0.01 0.21
 8 -4 -6 0.05 0.15
 -8 -4 6 -0.04 0.18
 -8 -4 6 0.1 0.1
 8 -4 -6 0.07 0.19
 8 -4 -6 0.09 0.22
 -8 -4 6 0.04 0.1
 -8 -4 6 0.26 0.19
 8 -4 -6 0.15 0.12
 -8 4 6 0.11 0.12
 -8 4 6 0.12 0.21
 -8 4 6 0.08 0.18
 -8 4 6 0.12 0.19
 -8 4 6 0.08 0.14
 -8 4 6 0.25 0.18
 -8 4 6 -0.09 0.14
 -8 4 6 0.18 0.16
 7 -4 -6 1.47 0.33
 7 -4 -6 1.53 0.27
 7 -4 -6 1.42 0.3
 -7 -4 6 1.92 0.3
 7 -4 -6 2.07 0.34
 -7 -4 6 1.2 0.25
 -7 -4 6 1.74 0.31
 -7 -4 6 1.41 0.27
 7 -4 -6 1.47 0.22
 -7 -4 6 1.67 0.2
 7 -4 -6 1.21 0.23
 7 -4 -6 1.34 0.29
 7 -4 -6 1.99 0.34
 -7 4 6 1.9 0.26
 -7 4 6 1.67 0.32
 -7 4 6 1.61 0.27
 -7 4 6 1.43 0.27
 -7 4 6 1.64 0.32
 -7 4 6 1.93 0.34
 -7 4 6 1.84 0.3
 -7 4 6 1.67 0.27
 -6 -4 6 15.81 0.71
 6 -4 -6 16.68 0.59
 6 -4 -6 16.17 0.72
 -6 -4 6 16.63 0.57
 -6 -4 6 15.61 0.81
 6 -4 -6 16.34 0.85
 -6 -4 6 16.11 0.7
 6 -4 -6 16.41 0.73
 6 -4 -6 16.56 0.73
 6 -4 -6 15.55 0.79
 6 -4 -6 16.97 0.75
 -6 4 6 16.18 0.73
 -6 4 6 16.59 0.66
 -6 4 6 16.2 0.77
 -6 4 6 15.66 0.76
 -6 4 6 16.56 0.68
 -6 4 6 17.75 0.77
 -6 4 6 16.69 0.8
 -6 4 6 16.42 0.75
 -6 4 6 17 0.97
 5 -4 -6 6.04 0.42
 5 -4 -6 6.85 0.34
 5 -4 -6 5.86 0.48
 5 -4 -6 5.1 0.42
 5 -4 -6 6.68 0.43
 5 -4 -6 6.21 0.42
 5 -4 -6 6.29 0.41
 -5 4 6 6.36 0.46
 -5 4 6 6.45 0.45
 -5 4 6 6.38 0.47
 4 -4 -6 6.91 0.48
 4 -4 -6 6.57 0.32
 4 -4 -6 6.73 0.42
 4 -4 -6 7.64 0.43
 4 -4 -6 6.66 0.45
 4 -4 -6 7.43 0.44
 -4 4 6 7.1 0.43
 -4 4 6 7.53 0.5
 3 -4 -6 0.71 0.17
 3 -4 -6 0.9 0.19
 3 -4 -6 0.62 0.17
 3 -4 -6 0.9 0.14
 3 -4 -6 0.79 0.18
 3 -4 -6 0.81 0.2
 -3 4 6 1 0.21
 -3 4 6 0.65 0.17
 2 -4 -6 4.89 0.35
 2 -4 -6 5.5 0.26
 2 -4 -6 4.96 0.33
 2 -4 -6 4.68 0.34
 2 -4 -6 4.89 0.33
 -2 -4 6 4.54 0.31
 -2 4 6 4.59 0.36
 -2 4 6 5.08 0.32
 1 -4 -6 115.99 3.03
 -1 -4 6 113.83 2.67
 1 -4 -6 115.53 2.75
 -1 -4 6 114.44 2.75
 1 -4 -6 117.29 3.01
 1 -4 -6 113.42 2.45
 1 -4 -6 110.77 3.11
 1 4 -6 120.65 2.96
 -1 4 6 123.99 3.2
 -1 4 6 124.29 2.97
 0 -4 6 69 1.83
 0 -4 -6 68.89 1.73
 0 -4 6 72.04 2.01
 0 -4 6 68.76 1.78
 0 -4 -6 75 1.8
 0 4 6 78.4 2.12
 0 4 -6 79.15 2
 0 4 6 73.74 1.92
 1 -4 6 11.99 0.52
 1 -4 6 12.05 0.55
 1 -4 6 12.4 0.55
 1 -4 6 12.96 0.6
 -1 4 -6 13.6 0.57
 -1 4 -6 13.91 0.63
 1 4 6 12.9 0.57
 2 -4 6 3.72 0.33
 2 -4 6 3.38 0.28
 2 -4 6 3.17 0.32
 2 -4 6 3.2 0.27
 -2 4 -6 3.27 0.29
 2 4 6 3.12 0.27
 -2 4 -6 3.3 0.32
 3 -4 6 2.71 0.28
 3 -4 6 3.16 0.29
 3 -4 6 2.85 0.31
 3 -4 6 3.1 0.32
 -3 4 -6 2.39 0.27
 -3 4 -6 3.22 0.32
 4 -4 6 13.15 0.6
 4 -4 6 12.54 0.67
 4 -4 6 13.06 0.61
 4 -4 6 12.78 0.67
 4 -4 6 14.62 0.73
 -4 4 -6 14.37 0.67
 -4 4 -6 14.2 0.69
 5 -4 6 8.63 0.51
 5 -4 6 8.49 0.58
 5 -4 6 8.68 0.52
 5 -4 6 9.76 0.75
 5 -4 6 9.61 0.61
 5 -4 6 8.77 0.57
 -5 4 -6 8.67 0.55
 -5 4 -6 9.55 0.57
 6 -4 6 13.53 0.76
 6 -4 6 13.9 0.75
 -6 -4 -6 13.37 0.64
 6 -4 6 13.64 0.75
 6 -4 6 13.23 0.77
 -6 -4 -6 13.42 0.64
 6 -4 6 12.89 0.65
 -6 -4 -6 13.58 1.61
 6 -4 6 13.15 0.64
 6 -4 6 13.21 0.83
 6 -4 6 13.77 0.68
 -6 4 -6 15.55 0.73
 -6 4 -6 14.44 0.72
 -6 4 -6 13.26 0.68
 6 4 6 14.83 1.01
 -6 4 -6 13.66 0.58
 6 4 6 14.2 0.78
 -7 -4 -6 6.91 0.46
 -7 -4 -6 6.71 1.25
 7 -4 6 7.27 0.58
 -7 -4 -6 7.51 0.5
 -7 -4 -6 9.11 0.71
 7 -4 6 6.98 0.59
 7 -4 6 7.18 0.62
 7 -4 6 7.03 0.47
 -7 4 -6 7.28 0.52
 -7 4 -6 7.82 0.55
 7 4 6 7.23 0.73
 -7 4 -6 7.69 0.47
 7 4 6 7.6 0.58
 -7 4 -6 7.44 0.32
 8 -4 6 6.07 0.57
 8 -4 6 6.34 0.55
 8 -4 6 7.18 0.55
 8 -4 6 5.83 0.55
 -8 -4 -6 6.17 0.42
 -8 -4 -6 6.91 0.49
 -8 -4 -6 6 0.45
 8 -4 6 6.06 0.43
 -8 -4 -6 6.33 0.65
 -8 4 -6 6.13 0.36
 -8 4 -6 6.56 0.49
 8 4 6 6.63 0.67
 8 4 6 6.65 0.52
 9 -4 6 0.62 0.16
 -9 -4 -6 0.58 0.19
 -9 -4 -6 0.92 0.22
 9 -4 6 0.64 0.19
 9 -4 6 0.85 0.25
 9 -4 6 0.9 0.26
 -9 -4 -6 0.89 0.17
 -9 4 -6 0.73 0.21
 9 4 6 0.68 0.2
 -9 4 -6 0.71 0.22
 9 4 6 0.74 0.25
 -10 -4 -6 15.27 0.59
 -10 -4 -6 15.43 0.38
 -10 -4 -6 14.46 0.56
 10 -4 6 15.19 0.61
 10 -4 6 15.01 0.67
 -10 4 -6 15.52 0.57
 10 4 6 14.61 0.62
 10 4 6 14.51 0.79
 -10 4 -6 15.6 0.59
 10 -5 -6 1.38 0.21
 -10 -5 6 1.8 0.21
 -10 -5 6 1.28 0.2
 10 -5 -6 1.17 0.24
 -10 -5 6 1.32 0.19
 -10 5 6 1.59 0.21
 -10 5 6 1.13 0.18
 -10 5 6 1.32 0.18
 -10 5 6 1.32 0.18
 -10 5 6 1.28 0.28
 -9 -5 6 7.68 0.44
 9 -5 -6 7.16 0.44
 -9 -5 6 7.09 0.29
 9 -5 -6 6.76 0.58
 -9 -5 6 6.42 0.47
 -9 -5 6 6.07 0.38
 9 -5 -6 6.72 0.4
 9 -5 -6 6.66 0.33
 -9 5 6 6.66 0.42
 -9 5 6 7.47 0.45
 -9 5 6 6.79 0.39
 -9 5 6 6.42 0.24
 -9 5 6 6.64 0.55
 -9 5 6 6.71 0.41
 8 -5 -6 0.62 0.16
 -8 -5 6 0.76 0.15
 8 -5 -6 0.35 0.25
 -8 -5 6 0.71 0.23
 8 -5 -6 0.43 0.22
 -8 -5 6 0.72 0.21
 8 -5 -6 0.39 0.17
 -8 -5 6 0.51 0.16
 8 -5 -6 0.61 0.21
 8 -5 -6 0.64 0.25
 -8 5 6 0.6 0.23
 -8 5 6 0.6 0.15
 -8 5 6 0.57 0.19
 -8 5 6 0.54 0.18
 -8 5 6 0.41 0.19
 -8 5 6 0.41 0.19
 -8 5 6 0.67 0.2
 7 -5 -6 18.17 0.94
 7 -5 -6 19.06 0.65
 7 -5 -6 20.3 0.93
 -7 -5 6 18.76 0.65
 -7 -5 6 19.09 0.79
 7 -5 -6 19.43 1.14
 7 -5 -6 20.5 0.85
 -7 -5 6 18.89 0.97
 -7 -5 6 18.81 0.81
 7 -5 -6 20.3 0.86
 -7 -5 6 18.85 1.98
 7 -5 -6 19.37 0.8
 7 -5 -6 20.01 0.94
 -7 5 6 20.05 0.82
 -7 5 6 19.32 0.83
 -7 5 6 20.19 0.74
 -7 5 6 19.96 0.8
 -7 5 6 22.01 1.18
 -7 5 6 18.84 0.88
 -7 5 6 19.62 0.83
 -7 5 6 19.7 0.86
 6 -5 -6 1.49 0.34
 6 -5 -6 2.05 0.28
 6 -5 -6 2.89 0.36
 6 -5 -6 1.63 0.22
 6 -5 -6 2.17 0.39
 -6 -5 6 1.49 0.21
 6 -5 -6 1.72 0.32
 -6 -5 6 1.49 0.3
 6 -5 -6 2.5 0.31
 6 -5 -6 1.58 0.33
 -6 -5 6 1.2 0.28
 -6 5 6 2.01 0.31
 -6 5 6 1.83 0.34
 -6 5 6 1.71 0.33
 -6 5 6 1.99 0.33
 -6 5 6 1.5 0.33
 -6 5 6 1.36 0.25
 -6 5 6 1.24 0.28
 5 -5 -6 21.59 0.97
 -5 -5 6 24.24 2.16
 5 -5 -6 22.43 1.01
 5 -5 -6 21.9 0.7
 -5 -5 6 21.4 1.05
 5 -5 -6 20.95 0.9
 5 -5 -6 22.63 0.9
 -5 -5 6 20.44 0.61
 5 -5 -6 22.76 0.88
 -5 -5 6 22.82 0.74
 -5 -5 6 22.38 0.87
 5 -5 -6 21.71 0.85
 -5 5 6 22.92 0.95
 -5 5 6 21.74 0.68
 -5 5 6 22.98 0.95
 -5 5 6 23.82 0.93
 -5 5 6 21.83 0.99
 -5 5 6 23.61 0.95
 -5 5 6 23.72 0.93
 -5 5 6 24.26 0.88
 -5 5 6 23.89 0.93
 -4 -5 6 0.11 0.11
 4 -5 -6 0.25 0.19
 4 -5 -6 0.19 0.17
 4 -5 -6 0.14 0.12
 4 -5 -6 0.17 0.15
 4 -5 -6 0.18 0.17
 4 -5 -6 0.14 0.18
 -4 -5 6 0.17 0.09
 4 -5 -6 0.13 0.14
 -4 5 6 0.19 0.2
 -4 5 6 0.33 0.16
 -4 5 6 -0.03 0.2
 -4 5 6 0.22 0.14
 -4 5 6 0.1 0.16
 3 -5 -6 9.07 0.52
 3 -5 -6 10.41 0.6
 3 -5 -6 8.98 0.39
 3 -5 -6 9.61 0.49
 3 -5 -6 9.56 0.51
 -3 5 6 10.02 0.53
 -3 5 6 9.54 0.59
 3 5 -6 9.95 0.57
 2 -5 -6 2.31 0.3
 2 -5 -6 2.19 0.27
 2 -5 -6 2.38 0.26
 2 -5 -6 2.25 0.2
 2 -5 -6 2.74 0.31
 -2 5 6 2.65 0.27
 2 5 -6 2.56 0.31
 -2 5 6 2.09 0.29
 1 -5 -6 8.01 0.45
 1 -5 -6 7.58 0.33
 1 -5 -6 8.02 0.44
 1 -5 -6 7.35 0.41
 -1 -5 6 7.84 0.45
 -1 -5 6 8.37 0.46
 1 5 -6 8.42 0.53
 -1 5 6 7.44 0.48
 -1 5 6 7.82 0.44
 0 -5 6 0.14 0.13
 0 -5 6 -0.05 0.12
 0 -5 -6 0.04 0.12
 0 -5 6 0.11 0.16
 0 5 6 -0.01 0.12
 0 5 -6 -0.1 0.12
 0 5 -6 -0.01 0.13
 1 -5 6 14.56 0.65
 1 -5 6 13.65 0.71
 1 -5 6 14.5 0.63
 1 -5 6 14.17 0.69
 -1 5 -6 15.18 0.73
 -1 5 -6 15.7 0.67
 1 5 6 15.37 0.7
 2 -5 6 0 0.13
 2 -5 6 0.05 0.15
 2 -5 6 0.33 0.17
 2 -5 6 -0.23 0.1
 2 -5 6 0.08 0.15
 -2 5 -6 0.39 0.15
 2 5 6 0.14 0.13
 -2 5 -6 0.15 0.15
 3 -5 6 12.78 0.68
 3 -5 6 12.18 0.62
 3 -5 6 12.01 0.69
 3 -5 6 13.89 0.73
 3 -5 6 12.6 0.63
 -3 5 -6 12.98 0.71
 -3 5 -6 12.84 0.65
 4 -5 6 35.75 1.22
 4 -5 6 35.82 1.3
 -4 -5 -6 33.74 1.13
 4 -5 6 34.2 1.16
 4 -5 6 33.19 1.29
 -4 -5 -6 40.23 2.78
 4 -5 6 35.45 1.36
 -4 5 -6 35.49 1.32
 4 5 6 35.16 1.63
 -4 5 -6 35.59 1.18
 -4 5 -6 35.25 1.24
 -4 5 -6 32.15 1.47
 5 -5 6 2.97 0.41
 5 -5 6 3.27 0.41
 5 -5 6 3.7 0.46
 -5 -5 -6 3.05 0.37
 -5 -5 -6 3.68 1.06
 -5 -5 -6 3.42 0.34
 5 -5 6 3.39 0.4
 5 -5 6 3.23 0.32
 5 -5 6 3.05 0.39
 5 -5 6 3.44 0.38
 5 -5 6 3.75 0.43
 5 5 6 3.34 0.44
 5 5 6 3.56 0.54
 -5 5 -6 3.82 0.42
 -5 5 -6 2.94 0.37
 -5 5 -6 3.36 0.37
 -5 5 -6 3.07 0.43
 6 -5 6 1.54 0.28
 6 -5 6 1.21 0.27
 6 -5 6 1.49 0.33
 6 -5 6 1.51 0.33
 6 -5 6 1.55 0.34
 6 -5 6 1.05 0.26
 -6 -5 -6 1.29 0.24
 -6 -5 -6 1.7 0.29
 6 -5 6 1.48 0.28
 6 -5 6 1.34 0.32
 -6 5 -6 1.25 0.23
 -6 5 -6 0.94 0.28
 -6 5 -6 1.82 0.33
 6 5 6 1.42 0.34
 6 5 6 1.53 0.3
 -6 5 -6 1.1 0.29
 7 -5 6 4.08 0.43
 7 -5 6 5.52 0.37
 7 -5 6 5 0.5
 -7 -5 -6 4.61 0.4
 7 -5 6 5.16 0.49
 7 -5 6 4.84 0.48
 -7 -5 -6 4.81 1.04
 7 -5 6 5.04 0.46
 7 -5 6 5.24 0.53
 7 -5 6 5.96 0.45
 -7 -5 -6 4.6 0.41
 7 5 6 4.88 0.47
 -7 5 -6 4.79 0.39
 -7 5 -6 4.93 0.44
 7 5 6 5.19 0.61
 -7 5 -6 5.24 0.46
 8 -5 6 2.34 0.38
 8 -5 6 1.77 0.29
 8 -5 6 1.43 0.31
 8 -5 6 1.89 0.29
 -8 -5 -6 1.43 0.29
 -8 -5 -6 2.31 0.3
 8 -5 6 1.92 0.23
 -8 5 -6 2 0.22
 8 5 6 2.25 0.42
 8 5 6 2.03 0.33
 -8 5 -6 2.6 0.32
 -9 -5 -6 19.47 0.69
 9 -5 6 18.68 0.69
 -9 -5 -6 18.47 0.7
 9 -5 6 17.33 0.75
 -9 -5 -6 18.89 0.57
 9 5 6 18.54 0.95
 -9 5 -6 18.54 0.7
 -9 5 -6 18.6 0.71
 9 5 6 19.02 0.75
 -9 -6 6 2.33 0.26
 -9 -6 6 2.05 0.24
 9 -6 -6 1.88 0.22
 9 -6 -6 2.14 0.28
 -9 6 6 2.72 0.25
 -9 6 6 2.34 0.23
 -9 6 6 1.87 0.24
 -9 6 6 2.37 0.24
 8 -6 -6 4.49 0.41
 8 -6 -6 4.87 0.47
 8 -6 -6 5.07 0.36
 8 -6 -6 4.02 0.28
 -8 -6 6 4.88 0.26
 -8 -6 6 4.85 0.36
 -8 -6 6 4.27 0.4
 -8 -6 6 3.41 0.82
 -8 6 6 4.74 0.35
 -8 6 6 4.56 0.39
 -8 6 6 5.05 0.36
 -8 6 6 4.65 0.29
 -8 6 6 4.66 0.37
 7 -6 -6 3.82 0.45
 7 -6 -6 4.7 0.31
 7 -6 -6 4.86 0.41
 7 -6 -6 5.02 0.51
 7 -6 -6 4.5 0.43
 -7 -6 6 4.75 0.31
 -7 -6 6 4.07 1
 7 -6 -6 4.59 0.36
 -7 -6 6 4.21 0.39
 7 -6 -6 5.18 0.47
 -7 -6 6 4.61 0.44
 -7 6 6 5.33 0.43
 -7 6 6 4.78 0.42
 -7 6 6 5.02 0.37
 -7 6 6 5.38 0.43
 -7 6 6 4.58 0.43
 -6 -6 6 68.3 1.87
 -6 -6 6 69.98 1.75
 6 -6 -6 69.16 1.94
 6 -6 -6 70.26 2.69
 -6 -6 6 71 2.6
 -6 -6 6 74.64 4.66
 6 -6 -6 70.28 2
 6 -6 -6 70.5 2.15
 6 -6 -6 63.91 2.2
 6 -6 -6 71.08 2.01
 6 -6 -6 65.75 2.08
 6 -6 -6 70.46 1.66
 -6 6 6 72.35 2.06
 -6 6 6 73.64 1.98
 -6 6 6 74.96 2.05
 -6 6 6 71.42 1.96
 -6 6 6 74.1 1.9
 -6 6 6 74.04 2.3
 5 -6 -6 14.57 0.79
 -5 -6 6 16.23 0.51
 -5 -6 6 17.02 0.65
 5 -6 -6 16.13 0.77
 5 -6 -6 16.38 0.84
 5 -6 -6 16.92 0.76
 5 -6 -6 16.25 0.98
 5 -6 -6 16.54 0.7
 -5 -6 6 14.84 0.7
 -5 -6 6 14.83 1.9
 -5 -6 6 16.31 0.91
 5 -6 -6 16.22 0.57
 5 -6 -6 17.55 0.88
 -5 6 6 16.07 0.74
 -5 6 6 16.84 0.83
 -5 6 6 17.25 0.8
 -5 6 6 17.49 0.77
 -5 6 6 17.27 0.56
 -5 6 6 17.5 0.81
 -5 6 6 17.5 0.79
 4 -6 -6 80.28 1.84
 4 -6 -6 80.96 2.21
 4 -6 -6 76.12 2.42
 -4 -6 6 78.35 1.83
 4 -6 -6 80.31 2.37
 4 -6 -6 80.05 2.23
 -4 -6 6 84.17 5.16
 -4 -6 6 77.23 2.91
 4 -6 -6 78.95 2.98
 -4 -6 6 75.11 1.83
 4 -6 -6 78.01 2.29
 4 -6 -6 78.24 2.12
 -4 -6 6 75.1 2.06
 -4 -6 6 79.51 1.99
 -4 6 6 82.7 2.33
 -4 6 6 86.81 2.22
 -4 6 6 82.33 2.18
 -4 6 6 78.91 2.02
 -4 6 6 83.76 2.25
 -3 -6 6 16.94 0.45
 3 -6 -6 15.95 0.93
 3 -6 -6 16.18 0.75
 3 -6 -6 18.15 0.75
 3 -6 -6 16.77 0.68
 3 -6 -6 17.21 0.83
 -3 -6 6 16.05 0.67
 -3 -6 6 16.25 0.94
 -3 -6 6 15.3 0.73
 -3 -6 6 16.99 0.63
 3 -6 -6 15.22 0.81
 3 -6 -6 17.85 0.57
 -3 -6 6 16.33 0.63
 -3 6 6 17.91 0.8
 -3 6 6 18.56 0.81
 -3 6 6 18.33 0.9
 -3 6 6 16.87 0.77
 -3 6 6 16.6 0.57
 -3 6 6 17.18 0.7
 -3 6 6 16.51 0.76
 -3 6 6 16.71 0.91
 -2 -6 6 6.15 0.47
 -2 -6 6 7.36 0.38
 2 -6 -6 7.56 0.47
 2 -6 -6 6.96 0.58
 -2 -6 6 6.84 0.61
 -2 -6 6 7.17 0.42
 2 -6 -6 7.31 0.53
 2 -6 -6 7.77 0.49
 -2 -6 6 7.58 0.46
 2 -6 -6 7.36 0.41
 -2 6 6 8.5 0.52
 -2 6 6 7.43 0.54
 2 6 -6 7.33 0.54
 -2 6 6 7.67 0.43
 -2 6 6 8.04 0.5
 -2 6 6 8.1 0.52
 -2 6 6 8.56 0.55
 -2 6 6 6.83 0.5
 1 -6 -6 0.7 0.21
 1 -6 -6 0.58 0.21
 -1 -6 6 0.76 0.22
 -1 -6 6 0.87 0.22
 -1 -6 6 1.21 0.27
 1 -6 -6 0.92 0.26
 -1 -6 6 0.96 0.14
 -1 -6 6 0.61 0.19
 1 -6 -6 0.88 0.22
 -1 -6 6 0.8 0.23
 -1 6 6 0.88 0.23
 1 6 -6 0.93 0.26
 -1 6 6 1.16 0.26
 -1 6 6 1.28 0.28
 -1 6 6 0.97 0.23
 -1 6 6 0.38 0.22
 -1 6 6 1.09 0.28
 0 -6 6 22.23 0.75
 0 -6 6 25.06 1
 0 -6 6 23.16 0.95
 0 -6 6 25.18 0.93
 0 -6 6 24.93 0.91
 0 -6 6 22.69 0.87
 0 -6 -6 20.88 1.02
 0 6 -6 26.57 0.97
 0 6 6 23.23 1
 0 6 -6 24.96 1.06
 0 6 -6 27.51 1.37
 0 6 6 23.25 1.08
 0 6 6 25.73 0.96
 1 -6 6 5.31 0.49
 1 -6 6 5.84 0.28
 1 -6 6 5.39 0.5
 1 -6 6 5.95 0.44
 1 -6 6 6.51 0.45
 1 -6 6 5.66 0.4
 1 6 6 5.73 0.52
 1 6 6 6.67 0.47
 -1 6 -6 6.6 0.46
 -1 6 -6 5.36 0.5
 1 6 6 6.51 0.49
 1 6 6 6.09 0.47
 -1 6 -6 7.05 0.65
 -1 6 -6 6.13 0.45
 -1 6 -6 6.08 0.51
 1 6 6 6 0.41
 -2 6 -6 0.29 0.22
 -2 6 -6 0.55 0.23
 -2 6 -6 0.67 0.21
 -2 6 -6 0.38 0.19
 2 6 6 0.49 0.22
 2 6 6 0.31 0.18
 2 6 6 0.27 0.21
 2 6 6 0.33 0.2
 -2 6 -6 0.47 0.24
 3 -6 6 35.43 1.04
 3 -6 6 33.11 1.33
 3 -6 6 35.28 1.24
 3 -6 6 33.79 1.15
 3 -6 6 36.07 1.21
 -3 -6 -6 34.18 0.95
 3 -6 6 32.7 1.31
 -3 -6 -6 39.53 2.82
 -3 6 -6 34.48 1.37
 3 6 6 36.74 1.21
 -3 6 -6 35.87 1.22
 -3 6 -6 33.96 1.55
 -3 6 -6 34.44 1.2
 3 6 6 36.75 1.63
 -3 6 -6 38.04 1.3
 -3 6 -6 35.13 1.2
 -4 -6 -6 0.09 0.22
 4 -6 6 0.42 0.19
 4 -6 6 0.38 0.21
 4 -6 6 0.23 0.22
 4 -6 6 0.33 0.24
 4 -6 6 0.15 0.21
 4 -6 6 0.31 0.19
 4 -6 6 0.22 0.2
 4 6 6 0.28 0.17
 4 6 6 0.09 0.19
 -4 6 -6 0.08 0.18
 -4 6 -6 0.35 0.2
 -4 6 -6 0.32 0.2
 5 -6 6 10.83 0.65
 5 -6 6 10.86 0.71
 -5 -6 -6 9.91 0.6
 5 -6 6 9.82 0.52
 5 -6 6 10.78 0.64
 5 -6 6 11.76 0.65
 5 -6 6 11.79 0.71
 -5 -6 -6 9.9 1.44
 -5 -6 -6 10.16 0.58
 5 -6 6 10.1 0.62
 -5 6 -6 10.64 0.54
 -5 6 -6 10.89 0.64
 5 6 6 11.42 0.81
 -5 6 -6 10.37 0.66
 5 6 6 10.4 0.61
 -5 6 -6 10.76 0.63
 6 -6 6 0.33 0.22
 -6 -6 -6 0.28 0.18
 6 -6 6 0.61 0.19
 -6 -6 -6 0.49 0.2
 6 -6 6 0.16 0.19
 6 -6 6 0.4 0.26
 6 -6 6 0.76 0.24
 6 -6 6 0.34 0.21
 -6 -6 -6 0.11 0.16
 -6 6 -6 0.31 0.18
 -6 6 -6 0.52 0.21
 6 6 6 0.24 0.18
 -6 6 -6 0.68 0.16
 6 6 6 0.46 0.22
 -7 -6 -6 5.97 0.41
 7 -6 6 6.58 0.52
 -7 -6 -6 5.4 1
 7 -6 6 5.54 0.45
 7 -6 6 6.44 0.52
 7 -6 6 6.53 0.42
 -7 -6 -6 6.32 0.44
 -7 6 -6 6.44 0.47
 7 6 6 6.48 0.45
 7 6 6 6.3 0.57
 -7 6 -6 6.19 0.38
 -8 -6 -6 2.38 0.24
 8 -6 6 2.56 0.27
 8 6 6 3.16 0.31
 8 6 6 2.56 0.37
 -8 6 -6 2.78 0.3
 -9 -6 -6 1.12 0.18
 9 -6 6 1.33 0.18
 9 6 6 0.92 0.22
 9 6 6 1 0.17
 -9 6 -6 0.89 0.17
 9 6 6 1.03 0.18
 -8 -7 6 3 0.58
 8 -7 -6 3.06 0.2
 -8 -7 6 2.84 0.25
 -8 -7 6 3.63 0.31
 8 -7 -6 3.04 0.25
 -8 7 6 3.47 0.2
 -8 7 6 3.02 0.25
 -7 -7 6 13.73 0.75
 7 -7 -6 14.8 0.55
 7 -7 -6 13.17 0.66
 -7 -7 6 14.38 0.6
 7 -7 -6 14.13 0.71
 -7 -7 6 12.75 1.41
 -7 7 6 13.25 0.59
 -7 7 6 13.96 0.58
 -7 7 6 14.69 0.58
 -7 7 6 13.66 0.53
 -7 7 6 14.45 0.6
 -6 -7 6 0.06 0.12
 -6 -7 6 -0.23 0.12
 6 -7 -6 -0.06 0.17
 6 -7 -6 0.09 0.17
 -6 -7 6 -0.11 0.13
 6 -7 -6 0.07 0.15
 -6 7 6 0.08 0.15
 -6 7 6 -0.06 0.14
 -6 7 6 0.24 0.16
 -6 7 6 -0.02 0.17
 -6 7 6 0.19 0.21
 5 -7 -6 56.93 1.79
 -5 -7 6 55.62 3.83
 5 -7 -6 52.47 1.65
 -5 -7 6 55.85 1.57
 -5 -7 6 54.97 2.18
 5 -7 -6 54.73 2.12
 -5 -7 6 56.81 1.22
 -5 7 6 57.72 1.64
 -5 7 6 58.27 1.64
 -5 7 6 60.42 1.7
 -4 -7 6 8.67 0.54
 4 -7 -6 8.36 0.62
 -4 -7 6 8.59 0.39
 -4 -7 6 8.13 0.66
 4 -7 -6 9.24 0.62
 4 -7 -6 8.89 0.57
 -4 -7 6 8.92 1.42
 4 -7 -6 8.94 0.54
 -4 7 6 8.62 0.45
 -4 7 6 9.03 0.54
 -4 7 6 9.57 0.59
 -4 7 6 9.58 0.57
 3 -7 -6 0.38 0.24
 3 -7 -6 0.13 0.21
 -3 -7 6 0.08 0.25
 -3 -7 6 0.23 0.15
 3 -7 -6 0.16 0.15
 3 -7 -6 0.52 0.21
 -3 -7 6 0.36 0.15
 -3 -7 6 0.06 0.17
 3 -7 -6 0.55 0.21
 -3 -7 6 0.25 0.17
 -3 7 6 0.58 0.26
 -3 7 6 0.22 0.17
 -3 7 6 0.67 0.25
 -3 7 6 0.11 0.17
 -3 7 6 0.44 0.12
 -2 -7 6 1.34 0.23
 -2 -7 6 1.54 0.27
 2 -7 -6 1.36 0.32
 -2 -7 6 1.86 0.22
 2 -7 -6 1.46 0.3
 2 -7 -6 1.82 0.35
 -2 -7 6 1.94 0.41
 2 -7 -6 1.27 0.28
 2 -7 -6 1.47 0.29
 -2 -7 6 1.69 0.29
 -2 7 6 1.71 0.29
 2 7 -6 1.1 0.33
 2 7 -6 1.43 0.27
 -2 7 6 1.31 0.31
 2 7 -6 1.62 0.32
 -2 7 6 1.56 0.3
 -2 7 6 1.28 0.21
 -2 7 6 1.91 0.34
 1 7 -6 1.11 0.27
 -1 7 6 0.78 0.22
 1 7 -6 1.08 0.32
 -1 7 6 0.72 0.24
 -1 7 6 0.57 0.28
 -1 7 6 1.34 0.3
 -1 7 6 0.57 0.22
 1 7 -6 1.39 0.29
 0 -7 -6 16.02 0.66
 0 -7 6 15.68 0.72
 0 -7 6 16.01 0.74
 0 -7 6 16.3 0.69
 0 -7 6 15.7 0.55
 0 -7 6 15.9 0.78
 0 -7 6 18.08 0.87
 0 7 -6 17.49 0.81
 0 7 -6 17.75 1.06
 0 7 6 17.66 0.71
 0 7 6 17.09 0.77
 0 7 6 16.54 0.77
 0 7 6 18.07 0.82
 0 7 -6 17.28 0.79
 -1 7 -6 0.29 0.18
 1 7 6 0.21 0.13
 -1 7 -6 0.16 0.21
 1 7 6 0.1 0.15
 -1 7 -6 0.25 0.2
 1 7 6 0.29 0.22
 1 7 6 0.16 0.19
 1 7 6 0.23 0.19
 1 7 6 -0.16 0.16
 -2 -7 -6 1.91 0.23
 2 -7 6 2.62 0.34
 2 -7 6 1.86 0.27
 2 -7 6 1.76 0.3
 2 -7 6 1.96 0.16
 2 -7 6 2.2 0.38
 2 -7 6 1.62 0.38
 2 -7 6 2.38 0.37
 2 7 6 2.69 0.39
 -2 7 -6 2.1 0.32
 2 7 6 2.1 0.34
 2 7 6 1.97 0.29
 2 7 6 1.97 0.37
 -2 7 -6 2.69 0.33
 -2 7 -6 2.2 0.4
 2 7 6 1.44 0.28
 -2 7 -6 2.15 0.36
 3 -7 6 4.45 0.28
 3 -7 6 4.69 0.44
 -3 -7 -6 3.61 1.17
 3 -7 6 4.22 0.48
 3 -7 6 4.12 0.4
 3 -7 6 4.73 0.39
 3 -7 6 4.06 0.44
 3 7 6 3.92 0.43
 3 7 6 4.29 0.49
 -3 7 -6 5.38 0.52
 -3 7 -6 5.15 0.44
 3 7 6 4.15 0.39
 -3 7 -6 5.08 0.41
 -3 7 -6 5.47 0.49
 3 7 6 4.93 0.43
 -3 7 -6 4.91 0.43
 4 -7 6 19.99 0.79
 -4 -7 -6 20.21 1.99
 4 -7 6 19.28 0.84
 4 -7 6 19.68 0.65
 4 -7 6 18.7 0.85
 4 -7 6 18.8 0.92
 -4 -7 -6 19.62 0.83
 4 7 6 21.78 0.88
 4 7 6 20.59 0.85
 -4 7 -6 20.54 0.87
 -4 7 -6 20.69 0.79
 4 7 6 20.96 0.84
 4 7 6 21.24 1.09
 5 -7 6 1.3 0.26
 5 -7 6 1 0.19
 -5 -7 -6 0.61 0.22
 5 -7 6 1.01 0.26
 5 -7 6 1.11 0.27
 5 -7 6 0.66 0.22
 5 7 6 0.84 0.2
 -5 7 -6 0.61 0.23
 -5 7 -6 1.26 0.29
 5 7 6 0.78 0.23
 5 7 6 0.7 0.22
 -5 7 -6 0.91 0.21
 6 -7 6 3.13 0.36
 6 -7 6 3.74 0.28
 6 -7 6 3.74 0.41
 -6 -7 -6 3.67 0.34
 -6 -7 -6 3.55 0.86
 6 -7 6 3.33 0.38
 6 7 6 4.24 0.36
 -6 7 -6 4 0.39
 -6 7 -6 4.04 0.35
 6 7 6 4.12 0.37
 6 7 6 3.9 0.44
 -7 -7 -6 0.07 0.1
 -7 -7 -6 -0.11 0.1
 7 -7 6 0.05 0.1
 7 -7 6 -0.06 0.16
 7 -7 6 0.07 0.16
 7 7 6 0.19 0.14
 7 7 6 -0.03 0.13
 7 7 6 0.1 0.15
 -7 7 -6 0.1 0.15
 -7 7 -6 0.13 0.1
 7 7 6 0.1 0.11
 -6 -8 6 0.16 0.12
 -6 -8 6 -0.01 0.13
 6 -8 -6 0.54 0.2
 -6 -8 6 0.3 0.13
 6 -8 -6 0.37 0.15
 -6 8 6 0.5 0.17
 6 8 -6 0.17 0.15
 6 8 -6 0.03 0.14
 -6 8 6 0.33 0.14
 6 8 -6 0.34 0.14
 -6 8 6 0.31 0.14
 -6 8 6 0.47 0.16
 -6 8 6 0.51 0.14
 5 -8 -6 -0.03 0.16
 -5 -8 6 -0.06 0.11
 5 -8 -6 0.2 0.14
 -5 -8 6 -0.16 0.12
 -5 -8 6 0.05 0.13
 -5 8 6 0.04 0.13
 -5 8 6 -0.1 0.15
 5 8 -6 -0.01 0.14
 -5 8 6 0.15 0.14
 5 8 -6 0.1 0.16
 -5 8 6 0.01 0.15
 5 8 -6 -0.11 0.15
 4 -8 -6 0.72 0.19
 -4 -8 6 0.62 0.11
 -4 -8 6 0.54 0.18
 -4 -8 6 0.47 0.18
 -4 -8 6 0.14 0.19
 4 -8 -6 0.44 0.22
 4 8 -6 0.51 0.22
 -4 8 6 0.87 0.23
 4 8 -6 0.61 0.19
 -4 8 6 0.57 0.19
 -4 8 6 0.66 0.13
 -4 8 6 0.53 0.19
 4 8 -6 0.28 0.18
 3 -8 -6 5.46 0.38
 -3 -8 6 4.89 1.19
 -3 -8 6 5.6 0.43
 3 -8 -6 5.18 0.43
 -3 -8 6 5.36 0.32
 -3 -8 6 5.18 0.52
 3 -8 -6 4.98 0.47
 -3 8 6 5.67 0.45
 -3 8 6 5.69 0.43
 3 8 -6 6.21 0.46
 3 8 -6 4.87 0.43
 -3 8 6 5.57 0.44
 3 8 -6 6.02 0.58
 -3 8 6 5.45 0.37
 -2 8 6 0.38 0.11
 2 8 -6 0.26 0.16
 2 8 -6 0.71 0.21
 -2 8 6 0.16 0.2
 2 8 -6 0.02 0.17
 -2 8 6 0.18 0.18
 -2 8 6 0.04 0.16
 -2 8 6 -0.16 0.17
 1 8 -6 3.77 0.39
 -1 8 6 3.09 0.36
 1 8 -6 3.35 0.39
 1 8 -6 3.68 0.48
 -1 8 6 3.33 0.41
 -1 8 6 4.04 0.4
 -1 8 6 3.54 0.4
 -1 8 6 3.51 0.31
 0 -8 6 3.03 0.38
 0 -8 -6 3.48 0.38
 0 -8 6 3.29 0.31
 0 -8 6 3.11 0.36
 0 -8 -6 3.26 0.28
 0 8 -6 3.57 0.46
 0 8 6 3.08 0.39
 0 8 6 3.06 0.39
 0 8 6 3.68 0.34
 0 8 6 3.68 0.39
 0 8 -6 3.64 0.4
 0 8 6 3.52 0.43
 0 8 -6 3.44 0.36
 1 -8 6 2.46 0.41
 1 -8 6 2.35 0.34
 1 -8 6 2.48 0.38
 1 -8 6 2.71 0.21
 1 -8 6 2.58 0.31
 1 -8 6 2.39 0.38
 1 -8 6 2.98 0.37
 -1 -8 -6 2.6 0.32
 -1 -8 -6 2.72 0.19
 1 8 6 2.26 0.34
 -1 8 -6 3.02 0.36
 1 8 6 2.46 0.32
 -1 8 -6 2.98 0.32
 -1 8 -6 3.12 0.41
 1 8 6 2.54 0.36
 1 8 6 3.08 0.38
 -2 -8 -6 2.31 0.28
 2 -8 6 1.81 0.28
 2 -8 6 1.37 0.3
 2 -8 6 1.66 0.29
 2 -8 6 1.65 0.31
 2 -8 6 2.02 0.25
 2 -8 6 1.38 0.3
 -2 8 -6 2 0.29
 2 8 6 2.09 0.3
 -2 8 -6 1.7 0.34
 2 8 6 1.89 0.3
 -2 8 -6 1.89 0.31
 -2 8 -6 1.68 0.27
 2 8 6 2.32 0.32
 3 -8 6 4.59 0.47
 3 -8 6 5.26 0.34
 -3 -8 -6 4.03 1.1
 3 -8 6 4.28 0.42
 -3 -8 -6 5.43 0.29
 3 -8 6 5.41 0.42
 3 -8 6 5 0.49
 -3 8 -6 5.54 0.4
 3 8 6 5.58 0.43
 3 8 6 5.23 0.43
 3 8 6 5.25 0.43
 -3 8 -6 5.62 0.45
 4 -8 6 0.13 0.2
 -4 -8 -6 0.33 0.18
 4 -8 6 0.54 0.23
 4 -8 6 0.36 0.19
 4 -8 6 0.36 0.16
 -4 -8 -6 0.04 0.17
 -4 8 -6 0.33 0.21
 4 8 6 0.3 0.11
 4 8 6 0.1 0.18
 4 8 6 0.18 0.18
 -4 8 -6 0.21 0.19
 4 8 6 0.29 0.18
 -4 8 -6 0.01 0.14
 4 8 6 0.15 0.12
 5 -8 6 0.03 0.16
 -5 -8 -6 0.2 0.14
 5 -8 6 -0.13 0.18
 5 -8 6 0.13 0.13
 -5 -8 -6 -0.02 0.12
 5 8 6 0.21 0.15
 5 8 6 -0.03 0.1
 -5 8 -6 0.08 0.16
 5 8 6 0.02 0.09
 -5 8 -6 0.1 0.15
 5 8 6 -0.12 0.14
 5 8 6 0.18 0.18
 6 -8 6 1.42 0.21
 6 -8 6 1.47 0.24
 -6 -8 -6 1.24 0.19
 6 8 6 0.98 0.18
 -6 8 -6 1.09 0.2
 -6 8 -6 1.79 0.19
 6 8 6 1.47 0.21
 6 8 6 0.99 0.18
 4 -9 -6 2.26 0.27
 -4 -9 6 1.74 0.58
 4 -9 -6 1.91 0.16
 4 9 -6 2.45 0.24
 4 9 -6 2.66 0.26
 -4 9 6 2.14 0.23
 4 9 -6 2.39 0.29
 -3 -9 6 3.8 0.77
 -3 -9 6 3.85 0.18
 3 -9 -6 3.91 0.33
 3 -9 -6 3.68 0.2
 3 9 -6 4.13 0.37
 -3 9 6 3.81 0.29
 -3 9 6 4.08 0.29
 3 9 -6 4.16 0.33
 3 9 -6 3.44 0.29
 -2 9 6 0.35 0.14
 2 9 -6 0.15 0.13
 -2 9 6 -0.02 0.13
 2 9 -6 0.27 0.12
 -2 9 6 0.32 0.14
 2 9 -6 0.3 0.16
 -1 -9 6 0.27 0.12
 1 -9 -6 0.07 0.14
 -1 -9 6 0.06 0.1
 1 9 -6 -0.08 0.12
 1 9 -6 0.04 0.14
 -1 9 6 0.07 0.15
 -1 9 6 -0.05 0.12
 1 9 -6 0.15 0.12
 -1 9 6 0.2 0.15
 0 -9 6 0.89 0.17
 0 -9 6 0.77 0.16
 0 -9 -6 0.67 0.16
 0 9 6 0.8 0.13
 0 9 6 0.67 0.18
 0 9 -6 0.66 0.16
 0 9 6 0.64 0.2
 0 9 -6 1.28 0.23
 0 9 6 0.53 0.19
 0 9 -6 0.79 0.19
 0 9 -6 0.66 0.13
 1 -9 6 2.16 0.2
 1 -9 6 2.34 0.27
 -1 -9 -6 2.09 0.35
 -1 -9 -6 2.4 0.21
 1 -9 6 1.79 0.24
 1 -9 6 1.92 0.3
 -1 9 -6 2.57 0.29
 1 9 6 1.97 0.23
 1 9 6 2.26 0.29
 -1 9 -6 2.17 0.29
 1 9 6 2.26 0.28
 1 9 6 2.65 0.35
 2 -9 6 0.21 0.15
 -2 -9 -6 0.63 0.2
 2 -9 6 0.23 0.17
 2 -9 6 0.18 0.12
 2 9 6 0.32 0.14
 2 9 6 0.29 0.16
 2 9 6 0.17 0.2
 2 9 6 0.17 0.13
 -2 9 -6 0.22 0.15
 -2 9 -6 0.14 0.14
 -3 -9 -6 3.23 0.3
 3 -9 6 3.18 0.26
 -3 -9 -6 3.76 0.71
 -3 -9 -6 3.41 0.3
 3 -9 6 2.9 0.31
 -3 9 -6 3.03 0.33
 -3 9 -6 3.52 0.24
 3 9 6 3.13 0.27
 -3 9 -6 3.46 0.3
 3 9 6 3.38 0.3
 3 9 6 3.55 0.3
 -11 0 7 -0.01 0.12
 -11 0 7 0.2 0.16
 -11 0 7 0.01 0.15
 -11 0 7 0.03 0.08
 -11 0 7 0.03 0.06
 -10 0 7 0.01 0.09
 -10 0 7 0.09 0.08
 -10 0 7 0.24 0.19
 -10 0 7 0.07 0.18
 -10 0 7 -0.07 0.17
 -9 0 7 0.08 0.09
 -9 0 7 0.19 0.2
 -9 0 7 0.05 0.11
 -9 0 7 0.52 0.22
 -9 0 7 0.42 0.21
 -8 0 7 0.08 0.18
 -8 0 7 0.05 0.09
 -8 0 7 0.21 0.19
 8 0 -7 -0.05 0.13
 -8 0 7 0.04 0.11
 -8 0 7 0.02 0.19
 -7 0 7 0.06 0.18
 7 0 -7 0.05 0.09
 7 0 -7 0.03 0.09
 -6 0 7 0.36 0.18
 5 0 -7 -0.01 0.04
 -5 0 7 0.1 0.13
 -4 0 7 0.02 0.11
 -3 0 7 0.05 0.08
 -2 0 7 -0.02 0.07
 -1 0 7 0.28 0.12
 0 0 -7 -0.03 0.06
 -1 0 -7 0.08 0.07
 2 0 7 -0.05 0.07
 -2 0 -7 -0.03 0.07
 -3 0 -7 0.05 0.09
 3 0 7 -0.13 0.07
 4 0 7 0 0.09
 5 0 7 0 0.11
 5 0 7 0.15 0.12
 5 0 7 0.02 0.14
 6 0 7 0.01 0.1
 7 0 7 -0.04 0.19
 7 0 7 0.12 0.12
 -7 0 -7 -0.02 0.14
 8 0 7 -0.24 0.18
 8 0 7 0.07 0.2
 8 0 7 -0.03 0.21
 -8 0 -7 -0.07 0.12
 -8 0 -7 -0.36 0.16
 -9 0 -7 0.05 0.15
 9 0 7 -0.09 0.16
 -9 0 -7 -0.1 0.18
 9 0 7 0.05 0.21
 9 0 7 0.09 0.19
 10 0 7 0.03 0.15
 10 0 7 -0.02 0.19
 -10 0 -7 -0.06 0.14
 -10 0 -7 -0.03 0.16
 10 0 7 0.04 0.18
 11 0 7 0.09 0.13
 11 0 7 -0.08 0.11
 -11 0 -7 -0.05 0.08
 -11 -1 7 0.85 0.2
 -11 -1 7 0.72 0.18
 -11 -1 7 1.15 0.21
 -11 -1 7 0.78 0.2
 -11 1 7 0.74 0.16
 -11 1 7 0.99 0.13
 -11 1 7 0.87 0.2
 -11 1 7 0.78 0.18
 -11 1 7 0.72 0.18
 -10 -1 7 -0.01 0.07
 -10 -1 7 0.04 0.18
 -10 -1 7 0.14 0.11
 -10 -1 7 0.06 0.15
 -10 -1 7 -0.13 0.17
 -10 1 7 -0.01 0.1
 -10 1 7 0.1 0.17
 -10 1 7 -0.06 0.18
 -10 1 7 0.11 0.18
 -10 1 7 0.08 0.1
 -9 -1 7 11.88 0.68
 -9 -1 7 11.57 0.62
 -9 -1 7 12.43 0.67
 -9 -1 7 12.27 0.64
 -9 -1 7 11.62 0.44
 -9 1 7 11.17 0.7
 -9 1 7 11.06 0.62
 -9 1 7 12.53 0.67
 -9 1 7 11.36 0.48
 -9 1 7 12.93 0.68
 -8 -1 7 1.79 0.3
 8 -1 -7 2.37 0.27
 -8 -1 7 2.43 0.36
 -8 -1 7 1.92 0.2
 -8 -1 7 2.47 0.31
 -8 -1 7 2.88 0.35
 -8 1 7 2.23 0.34
 -8 1 7 2.41 0.34
 -8 1 7 2.54 0.23
 -8 1 7 1.93 0.32
 -8 1 7 2.55 0.37
 -8 1 7 2.89 0.39
 7 -1 -7 0.34 0.13
 -7 -1 7 0.27 0.22
 7 -1 -7 0.29 0.13
 7 -1 -7 0.04 0.18
 7 1 -7 0.27 0.1
 -7 1 7 0.36 0.19
 -7 1 7 0.55 0.22
 -7 1 7 0.37 0.2
 6 -1 -7 13.34 0.66
 6 -1 -7 13.57 0.49
 6 -1 -7 13.28 0.53
 6 1 -7 13.56 0.45
 -6 1 7 12.28 0.57
 5 -1 -7 6.14 0.26
 5 -1 -7 6.86 0.3
 -5 1 7 6.33 0.39
 -5 1 7 6.35 0.44
 -5 1 7 7.3 0.39
 -4 -1 7 0.34 0.13
 4 -1 -7 0.44 0.08
 -4 1 7 0.39 0.14
 -4 1 7 0.34 0.15
 -4 1 7 0.47 0.14
 -4 1 7 0.46 0.13
 -3 -1 7 36.53 1.11
 3 -1 -7 37.91 1.01
 -3 1 7 40.08 1.14
 -3 1 7 36.67 1.17
 -3 1 7 38.18 1.06
 2 -1 -7 21.04 0.59
 -2 -1 7 18.61 0.67
 -2 1 7 20.17 0.71
 -2 1 7 20.36 0.64
 -2 1 7 21.83 0.69
 1 -1 -7 289.38 7.3
 -1 -1 7 300.59 7.2
 -1 1 7 321.36 7.36
 -1 1 7 303.94 7.61
 0 -1 -7 373.99 9.32
 0 -1 7 379.17 9.14
 0 1 7 398.77 9.29
 -1 -1 -7 53.93 1.54
 1 -1 7 58.81 1.59
 -1 1 -7 59.15 1.6
 1 1 7 57.41 1.51
 -2 -1 -7 0.84 0.15
 2 -1 7 0.7 0.15
 -2 1 -7 0.91 0.16
 3 -1 7 41.11 1.26
 3 1 7 39.15 1.18
 -3 1 -7 41.58 1.15
 -3 1 -7 43.17 1.27
 4 -1 7 94.24 2.65
 4 -1 7 101.54 2.56
 -4 1 -7 100.91 2.48
 5 -1 7 4.19 0.36
 5 -1 7 4.05 0.35
 5 -1 7 4.47 0.26
 -5 1 -7 4.54 0.32
 6 -1 7 75.06 2.15
 6 -1 7 77.89 2.25
 6 -1 7 73.5 1.75
 7 -1 7 31 1.18
 7 -1 7 33.07 1.52
 -7 -1 -7 28.89 1.01
 7 -1 7 30.87 1.15
 -7 -1 -7 30.39 0.94
 7 -1 7 30.51 0.89
 -7 -1 -7 30.45 1.05
 7 1 7 34.72 1.53
 -7 1 -7 28.46 0.82
 -7 1 -7 31.17 0.98
 7 1 7 30.61 1.17
 8 -1 7 8.24 0.72
 8 -1 7 8.93 0.43
 8 -1 7 8.04 0.59
 8 -1 7 8.32 0.57
 -8 -1 -7 8.3 0.53
 -8 -1 -7 8.51 0.52
 -8 1 -7 9.09 0.56
 8 1 7 8.51 0.63
 8 1 7 8.28 0.6
 -8 1 -7 7.62 0.55
 -8 1 -7 7.39 0.53
 -8 1 -7 8.31 0.41
 8 1 7 8 0.74
 9 -1 7 0 0.18
 9 -1 7 0.05 0.21
 -9 -1 -7 0.02 0.16
 -9 -1 -7 -0.03 0.18
 9 -1 7 -0.09 0.15
 9 1 7 -0.02 0.22
 9 1 7 -0.04 0.19
 -9 1 -7 0.02 0.18
 -9 1 -7 -0.03 0.17
 9 1 7 0.07 0.17
 10 -1 7 4.61 0.51
 10 -1 7 4.32 0.45
 10 -1 7 4.82 0.4
 -10 -1 -7 4.96 0.35
 -10 1 -7 4.32 0.38
 10 1 7 4.76 0.53
 -10 1 -7 4.83 0.38
 10 1 7 4.92 0.42
 11 -1 7 0.58 0.16
 -11 -1 -7 1.01 0.14
 11 -1 7 0.91 0.16
 -11 -1 -7 0.86 0.18
 11 -1 7 0.76 0.21
 11 1 7 0.94 0.18
 -11 1 -7 0.63 0.12
 11 1 7 0.61 0.18
 -11 -2 7 12.89 0.63
 -11 -2 7 13.45 0.55
 -11 -2 7 13.59 0.53
 -11 -2 7 12.82 0.55
 -11 2 7 12.54 0.67
 -11 2 7 12.6 0.53
 -11 2 7 13.16 0.54
 -11 2 7 13.1 0.55
 -11 2 7 12.11 0.41
 -10 -2 7 2.7 0.34
 -10 -2 7 2.76 0.33
 10 -2 -7 2.1 0.24
 -10 -2 7 3.07 0.32
 -10 -2 7 2.24 0.16
 -10 -2 7 2.73 0.34
 -10 2 7 2.76 0.34
 -10 2 7 2.31 0.34
 -10 2 7 2.53 0.35
 -10 2 7 2.49 0.24
 -10 2 7 2.76 0.36
 -9 -2 7 0.15 0.1
 -9 -2 7 0.06 0.2
 -9 -2 7 -0.08 0.17
 9 -2 -7 -0.02 0.21
 -9 -2 7 -0.08 0.16
 -9 -2 7 -0.13 0.07
 -9 2 7 -0.08 0.16
 -9 2 7 0.17 0.19
 -9 2 7 0.04 0.18
 -9 2 7 0.3 0.2
 -9 2 7 0.01 0.11
 -9 2 7 0.22 0.11
 8 -2 -7 0.29 0.23
 -8 -2 7 0.36 0.22
 -8 -2 7 1.9 0.31
 -8 -2 7 0.34 0.19
 8 -2 -7 0.23 0.16
 -8 -2 7 0.22 0.1
 -8 -2 7 0.02 0.1
 -8 2 7 0.2 0.07
 -8 2 7 0 0.19
 -8 2 7 -0.01 0.1
 -8 2 7 0.04 0.12
 -8 2 7 0.33 0.2
 -8 2 7 0.1 0.2
 7 -2 -7 4.72 0.45
 -7 -2 7 4.57 0.42
 7 -2 -7 4.88 0.34
 -7 -2 7 5.23 0.43
 -7 -2 7 4.43 0.24
 7 -2 -7 3.95 0.35
 -7 -2 7 4.12 0.4
 -7 2 7 4.67 0.43
 -7 2 7 4.7 0.46
 -7 2 7 4.27 0.42
 -7 2 7 4.65 0.4
 -7 2 7 4.13 0.3
 -7 2 7 4.43 0.31
 -7 2 7 4.31 0.43
 -7 2 7 4.3 0.25
 -7 2 7 3.97 0.38
 6 -2 -7 3.21 0.26
 6 -2 -7 3.78 0.33
 6 -2 -7 3.45 0.29
 6 -2 -7 3.9 0.38
 -6 2 7 3.55 0.32
 -6 2 7 3.7 0.42
 5 -2 -7 68.28 1.93
 5 -2 -7 67.3 1.79
 5 -2 -7 69.96 1.85
 -5 2 7 70.14 2.1
 -5 2 7 72.1 1.99
 5 2 -7 67.51 1.81
 -5 2 7 72.43 1.91
 4 -2 -7 1.23 0.14
 4 -2 -7 1.25 0.16
 -4 2 7 1.55 0.22
 -4 2 7 1.36 0.24
 -4 2 7 1.35 0.19
 3 -2 -7 6.9 0.32
 3 -2 -7 6.57 0.29
 -3 2 7 6.71 0.39
 3 2 -7 6.39 0.2
 -3 2 7 6.73 0.35
 -3 2 7 6.98 0.37
 -3 2 7 7.01 0.4
 2 -2 -7 74.98 1.98
 -2 -2 7 72.08 1.97
 -2 2 7 75.42 2.05
 -2 2 7 75.46 1.97
 -2 2 7 72.75 1.86
 -1 -2 7 5.58 0.32
 1 -2 -7 6.05 0.29
 -1 2 7 5.71 0.31
 -1 2 7 5.79 0.28
 -1 2 7 5.78 0.32
 0 -2 -7 49.2 1.35
 0 -2 7 45.11 1.36
 0 2 7 46.6 1.33
 0 2 7 48.4 1.31
 -1 -2 -7 31.06 0.93
 1 -2 7 28.83 0.85
 1 -2 7 28.3 0.95
 1 2 7 30.8 0.91
 -2 -2 -7 32.54 1.04
 2 -2 7 32.05 1.07
 2 -2 7 33.75 0.95
 -2 -2 -7 34.02 0.99
 -2 2 -7 35.56 1.1
 -2 2 -7 33.8 1.01
 2 2 7 34.17 0.98
 3 -2 7 11.86 0.56
 3 -2 7 12.1 0.49
 3 -2 7 12.72 0.57
 -3 2 -7 13.01 0.53
 4 -2 7 11.5 0.49
 4 -2 7 11.57 0.58
 4 -2 7 10.87 0.48
 4 -2 7 10.92 0.55
 -4 2 -7 11.63 0.52
 5 -2 7 81.44 2.25
 5 -2 7 77.71 1.8
 5 -2 7 80.56 2.35
 -5 2 -7 86.82 2.28
 6 -2 7 0.08 0.17
 6 -2 7 0.26 0.17
 6 -2 7 0.14 0.16
 6 -2 7 -0.09 0.1
 -6 2 -7 -0.24 0.13
 7 -2 7 56.54 1.38
 7 -2 7 54.73 2.25
 -7 -2 -7 53.14 1.55
 7 -2 7 53.11 1.75
 -7 -2 -7 54.68 1.55
 7 -2 7 53.89 1.72
 -7 -2 -7 56.68 1.56
 7 -2 7 53.71 1.75
 -7 2 -7 56.41 1.52
 -7 2 -7 54.67 1.6
 7 2 7 55.34 1.79
 7 2 7 56.95 2.34
 -7 2 -7 50.68 1.31
 8 -2 7 0.16 0.2
 8 -2 7 0.38 0.24
 8 -2 7 0.4 0.15
 8 -2 7 0.3 0.21
 -8 -2 -7 0.37 0.19
 8 -2 7 0.27 0.18
 -8 -2 -7 0.14 0.17
 8 2 7 0.22 0.23
 -8 2 -7 0.79 0.25
 -8 2 -7 0.28 0.2
 -8 2 -7 0.63 0.18
 8 2 7 0.27 0.21
 9 -2 7 4.29 0.4
 -9 -2 -7 4.68 0.37
 9 -2 7 4.41 0.47
 -9 -2 -7 4.05 0.39
 9 -2 7 3.76 0.5
 -9 2 -7 3.95 0.4
 9 2 7 4.84 0.56
 9 2 7 4.62 0.45
 -9 2 -7 5.03 0.45
 -9 2 -7 4.41 0.41
 10 -2 7 0.19 0.2
 -10 -2 -7 0.11 0.15
 -10 -2 -7 -0.06 0.15
 10 -2 7 0.04 0.14
 10 -2 7 -0.01 0.15
 -10 -2 -7 0.1 0.12
 10 2 7 0.15 0.15
 -10 2 -7 0.04 0.16
 10 2 7 0.29 0.19
 -10 2 -7 0.22 0.16
 -11 -2 -7 2.23 0.25
 11 -2 7 1.7 0.19
 11 -2 7 2.43 0.29
 11 -2 7 2.12 0.25
 -11 2 -7 1.93 0.19
 11 2 7 1.81 0.24
 11 2 7 2.19 0.31
 -11 -3 7 8.1 0.43
 -11 -3 7 8.15 0.38
 -11 -3 7 8.55 0.4
 -11 3 7 8.36 0.39
 -11 3 7 8.84 0.32
 -11 3 7 8.21 0.4
 -11 3 7 7.87 0.49
 -11 3 7 8.04 0.38
 -10 -3 7 5.26 0.39
 10 -3 -7 4.91 0.38
 10 -3 -7 4.86 0.3
 -10 -3 7 5.02 0.37
 -10 -3 7 5.46 0.41
 -10 -3 7 4.67 0.17
 -10 3 7 5.56 0.4
 -10 3 7 5.58 0.32
 -10 3 7 5.04 0.4
 -10 3 7 5.17 0.47
 -10 3 7 5.57 0.41
 -9 -3 7 1.01 0.25
 -9 -3 7 0.85 0.13
 -9 -3 7 0.7 0.21
 -9 -3 7 0.87 0.24
 -9 -3 7 0.8 0.18
 9 -3 -7 0.86 0.22
 9 -3 -7 0.55 0.25
 9 -3 -7 0.81 0.18
 -9 3 7 1.06 0.25
 -9 3 7 0.88 0.24
 -9 3 7 1.33 0.29
 -9 3 7 0.7 0.16
 -9 3 7 1.1 0.26
 -9 3 7 0.68 0.2
 8 -3 -7 0.01 0.22
 -8 -3 7 0.02 0.17
 -8 -3 7 0.27 0.1
 8 -3 -7 0.28 0.23
 -8 -3 7 0.1 0.17
 -8 -3 7 0.11 0.11
 8 -3 -7 0.22 0.15
 -8 -3 7 -0.14 0.16
 -8 3 7 0.23 0.11
 -8 3 7 0.05 0.18
 -8 3 7 0.36 0.24
 -8 3 7 0.18 0.12
 -8 3 7 0.04 0.13
 -8 3 7 0.04 0.17
 -7 -3 7 1.05 0.26
 -7 -3 7 -0.02 0.17
 -7 -3 7 0.26 0.2
 7 -3 -7 0.08 0.17
 -7 -3 7 0.05 0.09
 7 -3 -7 0.3 0.19
 7 -3 -7 0.23 0.15
 7 -3 -7 0.08 0.19
 7 -3 -7 0.36 0.15
 -7 3 7 0.22 0.13
 -7 3 7 0.24 0.18
 -7 3 7 -0.03 0.12
 -7 3 7 0.1 0.18
 -7 3 7 0.16 0.19
 -7 3 7 -0.02 0.12
 -7 3 7 0.09 0.14
 -7 3 7 -0.19 0.13
 -7 3 7 0.05 0.18
 6 -3 -7 20.67 0.79
 6 -3 -7 20.01 0.79
 6 -3 -7 20.94 0.85
 6 -3 -7 20.77 0.82
 6 -3 -7 21.56 0.95
 -6 3 7 20.54 0.77
 -6 3 7 21.71 0.87
 -6 3 7 20.21 0.88
 -6 3 7 21.11 0.69
 -6 3 7 21.94 0.87
 -6 3 7 19.99 0.85
 5 -3 -7 23.73 0.91
 5 -3 -7 25.38 0.9
 5 -3 -7 25.15 1
 5 -3 -7 25.19 0.86
 -5 3 7 26.12 0.98
 -5 3 7 26.02 0.94
 4 -3 -7 1.21 0.19
 4 -3 -7 0.86 0.16
 4 -3 -7 1.15 0.2
 -4 3 7 1.28 0.23
 -4 3 7 1.04 0.17
 -4 3 7 0.95 0.22
 3 -3 -7 4.95 0.29
 3 -3 -7 5.17 0.32
 -3 3 7 4.55 0.36
 -3 3 7 5.25 0.33
 -3 3 7 4.43 0.33
 2 -3 -7 6.41 0.33
 -2 -3 7 6.06 0.34
 2 -3 -7 6.21 0.35
 -2 3 7 6.34 0.38
 -2 3 7 6.25 0.38
 -2 3 7 6.48 0.35
 -2 3 7 6.01 0.38
 1 -3 -7 16.14 0.62
 -1 -3 7 16.33 0.62
 1 -3 -7 17.02 0.59
 -1 -3 7 14.63 0.57
 -1 3 7 17.35 0.59
 -1 3 7 16.93 0.65
 -1 3 7 15.39 0.63
 0 -3 -7 4.41 0.3
 0 -3 7 4.36 0.32
 0 -3 -7 4.99 0.29
 0 -3 7 4.31 0.29
 0 3 7 4.72 0.3
 0 3 7 4.46 0.28
 0 3 7 4.71 0.27
 -1 -3 -7 8.83 0.4
 1 -3 7 7.93 0.43
 -1 -3 -7 8.13 0.42
 1 -3 7 8.18 0.4
 1 -3 7 7.69 0.39
 -1 3 -7 8.93 0.43
 1 3 7 9.36 0.43
 2 -3 7 1.86 0.24
 2 -3 7 1.95 0.24
 2 -3 7 1.94 0.22
 2 -3 7 1.98 0.22
 2 3 7 2.08 0.2
 -2 3 -7 2.04 0.24
 -2 3 -7 2.1 0.22
 3 -3 7 153.62 3.57
 3 -3 7 151.5 4.02
 3 -3 7 149.9 3.8
 3 -3 7 151.74 3.46
 -3 3 -7 160.26 3.92
 -3 3 -7 166.67 4.11
 4 -3 7 26.6 0.89
 4 -3 7 25.52 0.86
 4 -3 7 26.23 1.02
 4 -3 7 25.12 0.97
 -4 3 -7 27.01 0.95
 5 -3 7 6.79 0.42
 5 -3 7 7.46 0.5
 5 -3 7 7.57 0.52
 5 -3 7 8.01 0.46
 5 -3 7 6.66 0.5
 -5 3 -7 7.25 0.46
 6 -3 7 30.34 1.19
 6 -3 7 28.58 1.15
 6 -3 7 34.46 1.22
 6 -3 7 31.98 1.27
 6 -3 7 31.86 1.47
 6 -3 7 33.61 0.89
 6 3 7 35.9 1.65
 -6 3 -7 32.84 1.14
 -6 3 -7 35.97 1.22
 -6 3 -7 31.75 1.15
 -6 3 -7 36.62 1.15
 7 -3 7 5.05 0.5
 -7 -3 -7 4.71 0.42
 7 -3 7 4.75 0.34
 7 -3 7 5.47 0.51
 -7 -3 -7 5.26 0.44
 7 -3 7 4.94 0.43
 7 -3 7 5.2 0.49
 7 -3 7 4.53 0.53
 -7 3 -7 4.7 0.45
 -7 3 -7 5.36 0.42
 -7 3 -7 5.39 0.45
 7 3 7 5.91 0.53
 7 3 7 4.86 0.63
 -7 3 -7 4.91 0.3
 8 -3 7 62.75 1.94
 -8 -3 -7 63.34 1.72
 8 -3 7 58.73 1.84
 8 -3 7 62.06 1.96
 -8 -3 -7 62.62 1.68
 8 -3 7 60.5 2.42
 8 -3 7 61.51 2.05
 -8 3 -7 60.85 1.62
 -8 3 -7 65.36 1.84
 8 3 7 64.07 2.63
 8 3 7 65.96 2.02
 9 -3 7 5.66 0.51
 9 -3 7 6.27 0.55
 -9 -3 -7 6.25 0.43
 9 -3 7 5.71 0.5
 -9 -3 -7 6.65 0.41
 9 -3 7 5.84 0.42
 9 3 7 5.57 0.47
 -9 3 -7 6.15 0.46
 9 3 7 6.29 0.61
 -9 3 -7 6.7 0.49
 10 -3 7 17.91 0.83
 10 -3 7 17.05 0.77
 -10 -3 -7 16.8 0.68
 10 -3 7 17.55 0.63
 -10 -3 -7 18.7 0.66
 -10 -3 -7 18 0.57
 -10 3 -7 17.7 0.68
 10 3 7 18.1 0.96
 10 3 7 18.39 0.74
 -10 3 -7 18.89 0.68
 10 -4 -7 5.99 0.54
 -10 -4 7 5.92 0.39
 -10 -4 7 6.05 0.41
 -10 -4 7 5.71 0.37
 10 -4 -7 6.12 0.42
 -10 4 7 5.96 0.48
 -10 4 7 6.12 0.33
 -10 4 7 5.32 0.37
 -10 4 7 6.15 0.38
 -10 4 7 6.19 0.39
 9 -4 -7 1.16 0.29
 -9 -4 7 1.36 0.25
 -9 -4 7 1.59 0.26
 -9 -4 7 1.05 0.23
 9 -4 -7 0.96 0.23
 9 -4 -7 1.47 0.21
 -9 -4 7 1.48 0.15
 -9 4 7 1.94 0.3
 -9 4 7 1.52 0.26
 -9 4 7 0.92 0.24
 -9 4 7 1.55 0.23
 -9 4 7 0.75 0.2
 -8 -4 7 0.06 0.09
 8 -4 -7 -0.02 0.21
 -8 -4 7 -0.05 0.09
 8 -4 -7 0.07 0.13
 -8 -4 7 0.11 0.17
 -8 -4 7 -0.21 0.18
 8 -4 -7 0.2 0.2
 8 -4 -7 0.16 0.21
 8 -4 -7 0.07 0.15
 -8 4 7 -0.12 0.16
 -8 4 7 0.04 0.12
 -8 4 7 -0.06 0.18
 -8 4 7 -0.03 0.14
 -8 4 7 -0.01 0.11
 -8 4 7 -0.01 0.2
 -8 4 7 0.22 0.16
 -7 -4 7 -0.01 0.09
 7 -4 -7 -0.05 0.12
 -7 -4 7 -0.14 0.16
 7 -4 -7 0.11 0.19
 -7 -4 7 0.05 0.09
 -7 -4 7 0.01 0.19
 7 -4 -7 0.12 0.16
 7 -4 -7 0.07 0.17
 7 -4 -7 0.02 0.17
 7 -4 -7 0 0.19
 7 -4 -7 0.11 0.22
 -7 4 7 0.1 0.13
 -7 4 7 -0.37 0.16
 -7 4 7 0.07 0.2
 -7 4 7 -0.08 0.15
 -7 4 7 0.04 0.14
 -7 4 7 -0.04 0.16
 -7 4 7 -0.05 0.13
 -7 4 7 -0.1 0.17
 -7 4 7 0 0.14
 6 -4 -7 0.21 0.16
 6 -4 -7 -0.06 0.19
 6 -4 -7 0.11 0.17
 -6 -4 7 0.17 0.12
 -6 -4 7 0.28 0.12
 -6 -4 7 0.28 0.19
 6 -4 -7 0.28 0.13
 6 -4 -7 0.29 0.17
 6 -4 -7 0.17 0.18
 -6 4 7 0.01 0.2
 -6 4 7 0.04 0.18
 -6 4 7 0.61 0.24
 -6 4 7 0.23 0.16
 -6 4 7 0.2 0.18
 -6 4 7 -0.1 0.16
 -6 4 7 0.29 0.16
 -6 4 7 0.34 0.19
 -6 4 7 0.02 0.13
 5 -4 -7 0.19 0.15
 5 -4 -7 0.15 0.16
 5 -4 -7 0.04 0.15
 5 -4 -7 0.04 0.14
 5 -4 -7 0.12 0.14
 5 -4 -7 0.06 0.15
 5 -4 -7 0.14 0.11
 -5 4 7 -0.01 0.13
 -5 4 7 0.32 0.2
 -5 4 7 0.13 0.17
 -5 4 7 -0.16 0.16
 -5 4 7 0.21 0.2
 4 -4 -7 2.57 0.28
 4 -4 -7 2.27 0.28
 4 -4 -7 2.05 0.26
 4 -4 -7 2.07 0.26
 4 -4 -7 2.77 0.32
 4 -4 -7 2.05 0.2
 4 -4 -7 2.72 0.3
 -4 4 7 2.65 0.33
 -4 4 7 2.11 0.27
 3 -4 -7 7.71 0.47
 3 -4 -7 7.58 0.33
 3 -4 -7 7.5 0.42
 3 -4 -7 7.5 0.44
 3 -4 -7 7.15 0.45
 -3 4 7 7.62 0.44
 -3 4 7 7.68 0.48
 2 -4 -7 21.74 0.78
 2 -4 -7 22.52 0.64
 2 -4 -7 21.01 0.84
 -2 -4 7 22.74 0.82
 -2 -4 7 23.89 0.8
 2 -4 -7 22.53 0.8
 -2 4 7 23.06 0.81
 -2 4 7 22.94 0.88
 -2 4 7 23.35 0.89
 1 -4 -7 4.65 0.34
 -1 -4 7 4.28 0.31
 1 -4 -7 4.56 0.31
 1 -4 -7 4.51 0.25
 1 -4 -7 4.59 0.31
 -1 -4 7 4.7 0.33
 1 4 -7 4.52 0.3
 -1 4 7 5.2 0.33
 -1 4 7 4.64 0.35
 -1 4 7 4.72 0.35
 0 -4 -7 12.35 0.52
 0 -4 7 12.79 0.55
 0 -4 7 12.7 0.59
 0 -4 7 12 0.53
 0 -4 -7 12.64 0.42
 0 4 7 13.21 0.52
 0 4 -7 14 0.57
 0 4 7 13.09 0.59
 1 -4 7 6.57 0.42
 1 -4 7 6.14 0.41
 1 -4 7 5.8 0.37
 1 -4 7 5.63 0.37
 -1 4 -7 6.52 0.39
 1 4 7 6.32 0.38
 2 -4 7 10.5 0.55
 2 -4 7 12 0.6
 2 -4 7 10.61 0.53
 2 -4 7 10.66 0.51
 2 4 7 11.57 0.53
 -2 4 -7 11.18 0.54
 -2 4 -7 11.51 0.59
 3 -4 7 4.95 0.37
 3 -4 7 6.1 0.45
 3 -4 7 5.09 0.42
 3 -4 7 5.22 0.42
 3 -4 7 4.58 0.36
 -3 4 -7 5.25 0.39
 -3 4 -7 5.64 0.43
 4 -4 7 65.72 1.77
 4 -4 7 63.22 1.81
 4 -4 7 64.38 1.96
 4 -4 7 66.23 1.96
 4 -4 7 65.14 2.06
 -4 4 -7 70.06 1.99
 -4 4 -7 68.54 2.04
 5 -4 7 70.44 2.66
 5 -4 7 73.03 2.11
 5 -4 7 72.37 2.17
 5 -4 7 73 2.01
 5 -4 7 74.06 2.3
 5 -4 7 72.65 2.17
 5 -4 7 71.55 1.95
 -5 4 -7 78.52 2.19
 5 4 7 74.58 2.97
 -5 4 -7 76.55 2.08
 6 -4 7 7.46 0.53
 6 -4 7 6.37 0.56
 6 -4 7 6.61 0.46
 -6 -4 -7 6.87 0.47
 6 -4 7 6.85 0.54
 6 -4 7 6.51 0.55
 6 -4 7 6.16 0.54
 6 -4 7 6.86 0.55
 6 -4 7 6.56 0.44
 -6 -4 -7 6.18 0.47
 6 -4 7 6.62 0.48
 -6 -4 -7 5.62 1.21
 6 4 7 6.49 0.67
 -6 4 -7 6.98 0.51
 6 4 7 6.93 0.54
 -6 4 -7 6.55 0.5
 -6 4 -7 6.8 0.43
 -6 4 -7 6.24 0.49
 7 -4 7 33.16 1.21
 -7 -4 -7 33.93 1.11
 -7 -4 -7 33.88 1.13
 7 -4 7 33.04 1.35
 -7 -4 -7 34.75 2.75
 7 -4 7 33.71 1.3
 7 -4 7 33.91 1.5
 7 -4 7 34.15 1.15
 7 -4 7 36.67 1.31
 7 4 7 35.75 1.3
 -7 4 -7 36.76 1.23
 -7 4 -7 34.57 0.92
 7 4 7 34.68 1.69
 -7 4 -7 34.93 1.12
 -7 4 -7 34.18 1.26
 8 -4 7 5.05 0.48
 -8 -4 -7 4.41 0.38
 8 -4 7 5.33 0.39
 8 -4 7 5.05 0.45
 8 -4 7 5.14 0.49
 8 -4 7 5.62 0.51
 -8 -4 -7 5.27 0.4
 8 4 7 5.4 0.45
 -8 4 -7 4.91 0.35
 8 4 7 4.72 0.55
 -8 4 -7 4.3 0.41
 9 -4 7 8 0.54
 9 -4 7 7.4 0.49
 9 -4 7 7.27 0.38
 -9 -4 -7 8.51 0.42
 -9 -4 -7 7.92 0.45
 9 -4 7 7.71 0.56
 9 -4 7 8.35 0.52
 9 4 7 8.93 0.52
 -9 4 -7 8.01 0.51
 -9 4 -7 7.74 0.48
 9 4 7 8.42 0.65
 10 -4 7 1.71 0.25
 10 -4 7 1.11 0.21
 -10 -4 -7 1.62 0.21
 -10 -4 -7 1.35 0.2
 -10 -4 -7 1.14 0.14
 10 4 7 1.18 0.27
 10 4 7 0.85 0.16
 -10 4 -7 1.21 0.2
 -10 4 -7 1.16 0.19
 9 -5 -7 0.13 0.17
 -9 -5 7 0.23 0.15
 9 -5 -7 0.14 0.13
 9 -5 -7 0.1 0.13
 -9 -5 7 0.11 0.09
 -9 -5 7 -0.03 0.14
 9 -5 -7 0.29 0.11
 -9 5 7 0.2 0.13
 -9 5 7 -0.03 0.11
 -9 5 7 0.03 0.13
 -9 5 7 0.16 0.16
 -9 5 7 0.03 0.15
 -8 -5 7 -0.06 0.09
 8 -5 -7 0.17 0.19
 -8 -5 7 0.2 0.16
 8 -5 -7 -0.11 0.14
 -8 -5 7 -0.01 0.08
 8 -5 -7 0.04 0.12
 8 -5 -7 -0.13 0.18
 8 -5 -7 0.13 0.21
 8 -5 -7 0.21 0.2
 -8 5 7 -0.05 0.14
 -8 5 7 -0.16 0.14
 -8 5 7 0.15 0.12
 -8 5 7 -0.1 0.11
 -8 5 7 -0.03 0.14
 -8 5 7 0.25 0.18
 -8 5 7 0.18 0.18
 7 -5 -7 0 0.18
 7 -5 -7 -0.16 0.11
 -7 -5 7 -0.03 0.09
 7 -5 -7 0.18 0.23
 7 -5 -7 -0.16 0.17
 -7 -5 7 -0.17 0.16
 -7 -5 7 0.13 0.17
 7 -5 -7 0.22 0.2
 -7 -5 7 0.03 0.1
 7 -5 -7 -0.09 0.19
 7 -5 -7 -0.09 0.19
 7 -5 -7 -0.06 0.14
 -7 5 7 0.09 0.2
 -7 5 7 0.14 0.18
 -7 5 7 0.16 0.17
 -7 5 7 -0.08 0.14
 -7 5 7 -0.04 0.17
 -7 5 7 0.05 0.19
 -7 5 7 0.01 0.19
 -7 5 7 0.07 0.14
 6 -5 -7 16.24 0.59
 6 -5 -7 15.98 0.73
 6 -5 -7 17.52 0.85
 -6 -5 7 16.48 0.6
 -6 -5 7 15.14 0.84
 -6 -5 7 14.54 0.7
 6 -5 -7 15.71 0.76
 -6 -5 7 17.06 1.95
 6 -5 -7 16.15 0.86
 6 -5 -7 15.88 0.7
 -6 5 7 18.17 0.82
 -6 5 7 16.74 0.76
 -6 5 7 16.24 0.82
 -6 5 7 17.16 0.81
 -6 5 7 16.26 0.76
 -6 5 7 16.46 0.72
 -6 5 7 17.41 0.79
 -6 5 7 16.2 0.68
 5 -5 -7 5.39 0.49
 5 -5 -7 4.59 0.48
 -5 -5 7 5.11 0.23
 -5 -5 7 5.04 0.45
 5 -5 -7 5.9 0.45
 5 -5 -7 4.8 0.39
 5 -5 -7 4.97 0.43
 -5 -5 7 5.18 0.33
 5 -5 -7 4.98 0.43
 -5 -5 7 5.08 1.23
 -5 -5 7 4.89 0.43
 5 -5 -7 4.9 0.32
 -5 5 7 4.85 0.45
 -5 5 7 5.39 0.25
 -5 5 7 4.73 0.47
 -5 5 7 4.84 0.42
 -5 5 7 4.89 0.42
 -5 5 7 5.76 0.47
 -5 5 7 5.65 0.47
 -5 5 7 5.36 0.42
 4 -5 -7 12.13 0.48
 -4 -5 7 11.9 0.61
 4 -5 -7 13.21 0.63
 4 -5 -7 12.07 0.59
 4 -5 -7 12.25 0.64
 4 -5 -7 12.02 0.62
 -4 -5 7 11.91 0.45
 -4 -5 7 11.96 0.72
 4 -5 -7 12.72 0.72
 -4 -5 7 12.51 0.52
 -4 5 7 13.78 0.66
 -4 5 7 13.23 0.66
 -4 5 7 12.94 0.64
 -4 5 7 12.12 0.51
 -4 5 7 11.88 0.7
 -4 5 7 12.28 0.69
 -4 5 7 12.91 0.67
 3 -5 -7 25.7 0.93
 3 -5 -7 26.64 1.06
 3 -5 -7 24.69 0.75
 3 -5 -7 28.69 0.95
 3 -5 -7 26.25 0.96
 3 -5 -7 24.48 0.97
 3 5 -7 27.28 1.06
 -3 5 7 28.64 1.01
 -3 5 7 25.77 1.07
 2 -5 -7 21.5 0.66
 2 -5 -7 23.08 0.93
 2 -5 -7 23.36 0.85
 2 -5 -7 21.77 0.8
 2 -5 -7 21.89 0.81
 2 5 -7 23.34 0.96
 -2 5 7 23.24 0.96
 -2 5 7 22.67 0.85
 1 -5 -7 17.42 0.71
 1 -5 -7 17.81 0.57
 -1 -5 7 19.48 0.75
 1 -5 -7 17.75 0.69
 1 -5 -7 17.79 0.69
 -1 -5 7 16.99 0.81
 -1 -5 7 18.38 0.71
 1 5 -7 17.83 0.81
 -1 5 7 18.05 0.8
 -1 5 7 18.74 0.72
 0 -5 7 0.64 0.22
 0 -5 7 0.65 0.18
 0 -5 7 0.64 0.19
 0 -5 -7 0.94 0.21
 0 5 7 0.54 0.17
 0 5 -7 0.8 0.24
 0 5 -7 0.58 0.18
 1 -5 7 1.14 0.23
 1 -5 7 1.24 0.24
 1 -5 7 1.58 0.28
 1 -5 7 1.3 0.29
 -1 5 -7 1.26 0.27
 1 5 7 1.39 0.24
 -1 5 -7 1.08 0.23
 2 -5 7 0.18 0.17
 2 -5 7 0.14 0.17
 2 -5 7 0.06 0.14
 2 -5 7 0.29 0.19
 2 -5 7 0.08 0.18
 -2 5 -7 0.24 0.19
 -2 5 -7 0.24 0.15
 3 -5 7 1.32 0.25
 3 -5 7 2.03 0.33
 3 -5 7 1.26 0.3
 3 -5 7 1.81 0.33
 3 -5 7 1.23 0.25
 -3 5 -7 1.59 0.26
 -3 5 -7 1.2 0.3
 4 -5 7 78.08 2.18
 4 -5 7 80.77 2.32
 -4 -5 -7 75.47 2.03
 4 -5 7 77.83 2.45
 4 -5 7 76.44 2.11
 4 -5 7 79.42 2.19
 4 -5 7 80.14 2.36
 4 -5 7 76.74 1.98
 -4 -5 -7 81.38 4.98
 -4 5 -7 82.39 2.26
 4 5 7 77.73 2.97
 4 5 7 77.6 2.28
 -4 5 -7 72.81 2.84
 -4 5 -7 76.56 2.38
 -4 5 -7 75.57 2.18
 -4 5 -7 80.27 2.11
 -4 5 -7 78.04 2.06
 -5 -5 -7 15.09 1.85
 -5 -5 -7 17.45 0.75
 5 -5 7 17.32 0.88
 5 -5 7 17.38 0.79
 5 -5 7 18.53 0.94
 5 -5 7 18.74 0.83
 5 -5 7 16.7 0.71
 5 -5 7 18.91 0.9
 -5 5 -7 19.73 0.94
 -5 5 -7 18.36 0.75
 -5 5 -7 16.58 0.82
 5 5 7 18.56 0.85
 -5 5 -7 18.05 0.81
 5 5 7 17.6 1.07
 6 -5 7 36.71 1.21
 6 -5 7 34.18 1.32
 6 -5 7 36.59 1.35
 6 -5 7 35.54 1.13
 6 -5 7 35.89 1.42
 -6 -5 -7 35.71 1.16
 -6 -5 -7 34.3 1.15
 -6 -5 -7 34.72 2.84
 6 5 7 36.51 1.7
 6 5 7 36.92 1.32
 -6 5 -7 37.23 1.25
 -6 5 -7 35.83 1.06
 -6 5 -7 36.42 1.21
 -6 5 -7 35.85 1.31
 7 -5 7 1.69 0.34
 7 -5 7 2.41 0.37
 7 -5 7 2.47 0.4
 -7 -5 -7 2.41 0.32
 7 -5 7 2.4 0.34
 7 -5 7 1.86 0.37
 -7 -5 -7 2.38 0.87
 -7 -5 -7 2.17 0.31
 7 5 7 2.42 0.37
 -7 5 -7 2.68 0.18
 7 5 7 3.01 0.49
 -7 5 -7 2.85 0.38
 -7 5 -7 2.17 0.32
 -8 -5 -7 0.38 0.17
 8 -5 7 0.18 0.21
 8 -5 7 -0.02 0.2
 -8 -5 -7 0.15 0.15
 -8 -5 -7 -0.01 0.15
 8 -5 7 0.6 0.2
 -8 5 -7 0.43 0.14
 -8 5 -7 0.27 0.18
 8 5 7 0.24 0.18
 8 5 7 0.25 0.17
 9 -5 7 3.84 0.37
 9 -5 7 3.81 0.34
 -9 -5 -7 3.81 0.26
 -9 -5 -7 3.53 0.3
 -9 5 -7 3.92 0.33
 9 5 7 3.27 0.38
 -9 5 -7 3.92 0.35
 9 5 7 3.46 0.31
 9 -6 -7 1.13 0.19
 -9 -6 7 1.44 0.21
 -9 -6 7 1.65 0.22
 9 -6 -7 1.23 0.24
 -9 6 7 1.78 0.22
 -9 6 7 1.33 0.2
 -9 6 7 1.47 0.21
 8 -6 -7 0.23 0.17
 8 -6 -7 0.04 0.13
 8 -6 -7 0.03 0.15
 8 -6 -7 0.25 0.14
 -8 -6 7 -0.04 0.13
 -8 -6 7 0.19 0.11
 -8 -6 7 0.07 0.15
 -8 6 7 -0.15 0.15
 -8 6 7 0.17 0.1
 -8 6 7 0.07 0.14
 -8 6 7 0.16 0.13
 -8 6 7 0.27 0.15
 7 -6 -7 0.31 0.21
 -7 -6 7 0.39 0.15
 7 -6 -7 0.92 0.24
 -7 -6 7 0.63 0.2
 -7 -6 7 0.41 0.12
 7 -6 -7 0.46 0.15
 7 -6 -7 0.36 0.23
 7 -6 -7 0.46 0.17
 7 -6 -7 0.57 0.23
 -7 6 7 0.45 0.2
 -7 6 7 0.81 0.22
 -7 6 7 0.7 0.18
 -7 6 7 0.65 0.22
 -7 6 7 0.69 0.21
 6 -6 -7 0.57 0.22
 6 -6 -7 0.54 0.16
 6 -6 -7 0.5 0.24
 6 -6 -7 0.57 0.21
 -6 -6 7 0.59 0.15
 6 -6 -7 0.74 0.19
 6 -6 -7 0.44 0.24
 6 -6 -7 0.28 0.23
 -6 -6 7 0.06 0.2
 -6 -6 7 0.51 0.18
 -6 -6 7 0.28 0.18
 6 -6 -7 0.45 0.22
 -6 6 7 0.69 0.22
 -6 6 7 0.92 0.25
 -6 6 7 0.47 0.25
 -6 6 7 0.58 0.19
 -6 6 7 0.39 0.23
 5 -6 -7 8.42 0.61
 5 -6 -7 8.82 0.73
 -5 -6 7 9 0.65
 5 -6 -7 9.27 0.42
 -5 -6 7 9.93 0.57
 5 -6 -7 8.32 0.54
 5 -6 -7 9.57 0.64
 -5 -6 7 8.58 0.44
 -5 -6 7 8.58 1.45
 5 -6 -7 9.13 0.51
 -5 -6 7 9.15 0.31
 5 -6 -7 9.08 0.58
 5 -6 -7 8.46 0.63
 -5 6 7 8.31 0.55
 -5 6 7 9.88 0.63
 -5 6 7 9.31 0.31
 -5 6 7 9.26 0.59
 -5 6 7 10.15 0.6
 -5 6 7 10.01 0.56
 -5 6 7 10.81 0.61
 -4 -6 7 9.35 0.47
 4 -6 -7 9.34 0.41
 4 -6 -7 7.79 0.58
 -4 -6 7 9.16 1.54
 -4 -6 7 8.69 0.53
 4 -6 -7 9.11 0.49
 4 -6 -7 8.57 0.61
 4 -6 -7 9.26 0.55
 4 -6 -7 8.87 0.77
 -4 -6 7 8.78 0.39
 4 -6 -7 7.98 0.58
 4 -6 -7 8.66 0.55
 -4 -6 7 8.66 0.65
 -4 6 7 9.03 0.45
 -4 6 7 9.96 0.59
 -4 6 7 10.04 0.62
 -4 6 7 9.47 0.59
 -4 6 7 8.97 0.59
 -4 6 7 9.69 0.57
 3 -6 -7 14.4 0.7
 3 -6 -7 13.18 0.73
 3 -6 -7 13.87 0.61
 -3 -6 7 14.2 0.55
 3 -6 -7 14.39 0.67
 3 -6 -7 13.75 0.51
 3 -6 -7 13.52 0.86
 -3 -6 7 13.12 0.65
 -3 -6 7 13.99 0.85
 -3 -6 7 13.31 0.53
 -3 6 7 14.23 0.61
 -3 6 7 13.83 0.44
 -3 6 7 13.99 0.7
 -3 6 7 13.84 0.81
 -3 6 7 13.5 0.68
 -3 6 7 14.33 0.68
 2 6 -7 0.69 0.23
 -2 6 7 0.78 0.24
 -2 6 7 0.8 0.25
 -2 6 7 0.43 0.22
 -2 6 7 0.74 0.18
 -2 6 7 0.71 0.23
 -2 6 7 0.55 0.18
 1 6 -7 0.61 0.24
 -1 6 7 1.05 0.27
 -1 6 7 0.52 0.21
 -1 6 7 0.9 0.21
 -1 6 7 0.72 0.23
 -1 6 7 0.51 0.2
 0 -6 7 0.17 0.2
 0 -6 7 0.51 0.23
 0 -6 -7 -0.02 0.14
 0 -6 7 0.03 0.19
 0 -6 7 -0.01 0.19
 0 -6 7 0.13 0.17
 0 -6 7 -0.15 0.13
 0 -6 7 0.21 0.18
 0 -6 7 0.21 0.13
 0 6 7 0.13 0.19
 0 6 7 0.45 0.21
 0 6 7 0.1 0.15
 0 6 -7 0.1 0.17
 0 6 7 0.34 0.19
 0 6 -7 0.2 0.21
 -1 6 -7 0.52 0.22
 1 6 7 0.49 0.27
 1 6 7 0.76 0.24
 1 6 7 0.89 0.25
 -1 6 -7 0.64 0.25
 -1 6 -7 0.63 0.24
 1 6 7 0.55 0.21
 -1 6 -7 0.3 0.23
 -1 6 -7 0.43 0.22
 1 6 7 0.51 0.17
 1 6 7 0.44 0.19
 2 -6 7 3.52 0.51
 2 -6 7 3.23 0.36
 2 -6 7 2.93 0.44
 2 -6 7 3.17 0.43
 2 -6 7 3.93 0.36
 2 -6 7 3.45 0.36
 2 -6 7 3.48 0.26
 -2 6 -7 3.66 0.43
 -2 6 -7 4.58 0.41
 -2 6 -7 2.81 0.35
 -2 6 -7 3.76 0.39
 2 6 7 3.48 0.43
 2 6 7 3.38 0.44
 2 6 7 2.98 0.46
 2 6 7 3.5 0.35
 -2 6 -7 4.25 0.52
 2 6 7 3.09 0.4
 3 -6 7 7.76 0.41
 -3 -6 -7 10.62 1.36
 -3 -6 -7 7.95 0.39
 3 -6 7 7.93 0.55
 3 -6 7 7.12 0.48
 3 -6 7 8.58 0.55
 3 -6 7 7.45 0.58
 3 -6 7 8.14 0.61
 3 -6 7 7.51 0.59
 -3 6 -7 7.95 0.5
 3 6 7 7.98 0.65
 -3 6 -7 8.12 0.65
 -3 6 -7 8.45 0.56
 3 6 7 7.83 0.51
 -3 6 -7 8.46 0.56
 3 6 7 8.35 0.54
 4 -6 7 1.41 0.29
 4 -6 7 1.21 0.32
 4 -6 7 1.04 0.27
 -4 -6 -7 0.6 0.28
 4 -6 7 1.18 0.28
 4 -6 7 1.32 0.22
 4 -6 7 1.18 0.31
 4 -6 7 1.43 0.3
 -4 6 -7 1.76 0.32
 -4 6 -7 1.86 0.33
 -4 6 -7 1.33 0.27
 4 6 7 1.81 0.31
 4 6 7 1.37 0.31
 -4 6 -7 1.33 0.3
 4 6 7 1.02 0.26
 -4 6 -7 1.32 0.34
 5 -6 7 2.08 0.37
 -5 -6 -7 2.44 0.37
 5 -6 7 1.77 0.3
 5 -6 7 2.41 0.41
 5 -6 7 1.49 0.24
 5 -6 7 1.6 0.33
 5 -6 7 1.41 0.3
 5 -6 7 1.62 0.29
 -5 6 -7 2.2 0.38
 -5 6 -7 2.07 0.33
 5 6 7 1.52 0.26
 -5 6 -7 1.69 0.28
 -5 6 -7 2.01 0.35
 5 6 7 1.96 0.42
 6 -6 7 2.3 0.38
 -6 -6 -7 1.8 0.28
 -6 -6 -7 2.33 0.34
 6 -6 7 1.98 0.34
 6 -6 7 2.99 0.37
 6 -6 7 2.01 0.31
 6 -6 7 2.58 0.4
 6 -6 7 1.79 0.34
 -6 6 -7 1.77 0.29
 6 6 7 1.93 0.32
 -6 6 -7 2.88 0.35
 -6 6 -7 2.94 0.28
 6 6 7 2.16 0.41
 7 -6 7 0.18 0.15
 7 -6 7 0.15 0.22
 -7 -6 -7 0.02 0.15
 -7 -6 -7 0.04 0.13
 7 -6 7 -0.05 0.18
 7 -6 7 0 0.17
 7 -6 7 -0.32 0.18
 7 6 7 -0.03 0.13
 -7 6 -7 0.26 0.19
 7 6 7 -0.02 0.15
 -7 6 -7 0.09 0.15
 8 -6 7 7.11 0.47
 8 -6 7 7.46 0.38
 -8 -6 -7 7.68 0.37
 -8 -6 -7 6.51 0.95
 8 6 7 7.28 0.4
 8 6 7 8.3 0.44
 8 6 7 7.74 0.53
 -8 6 -7 7.49 0.43
 7 -7 -7 0.11 0.1
 7 -7 -7 0 0.16
 -7 -7 7 0.01 0.1
 7 -7 -7 0.01 0.12
 -7 -7 7 0.04 0.13
 -7 -7 7 -0.15 0.12
 -7 7 7 0.16 0.14
 -7 7 7 0.02 0.14
 -7 7 7 -0.19 0.11
 -7 7 7 -0.02 0.1
 -7 7 7 0.24 0.16
 -6 -7 7 0.23 0.13
 -6 -7 7 -0.2 0.13
 6 -7 -7 0.07 0.18
 -6 -7 7 -0.13 0.15
 6 -7 -7 0.08 0.15
 6 -7 -7 0.16 0.17
 -6 7 7 0.32 0.16
 -6 7 7 -0.13 0.17
 -6 7 7 0.07 0.16
 -6 7 7 0.11 0.17
 -6 7 7 -0.14 0.16
 5 -7 -7 24.97 0.94
 5 -7 -7 24.01 1.14
 -5 -7 7 24.44 2.22
 5 -7 -7 24.23 0.96
 -5 -7 7 24.83 0.9
 -5 -7 7 24.6 1.18
 5 -7 -7 22.53 1
 -5 7 7 25.96 0.94
 -5 7 7 27.22 0.97
 -5 7 7 25.76 0.96
 -5 7 7 26.41 1.05
 -5 7 7 26.57 0.95
 -4 -7 7 9.12 0.69
 -4 -7 7 9.86 0.56
 -4 -7 7 9.19 1.42
 4 -7 -7 9.08 0.58
 4 -7 -7 9.6 0.58
 4 -7 -7 9.62 0.64
 4 -7 -7 9.31 0.64
 -4 -7 7 9.69 0.39
 -4 7 7 9.99 0.68
 -4 7 7 10.03 0.61
 -4 7 7 9.76 0.44
 -4 7 7 9.51 0.57
 -4 7 7 9.47 0.57
 -3 -7 7 12.84 0.43
 -3 -7 7 12.29 0.82
 -3 -7 7 13.16 0.64
 3 -7 -7 11.84 0.67
 3 -7 -7 11.36 0.63
 3 -7 -7 11.95 0.73
 -3 -7 7 12.3 0.51
 3 -7 -7 12.04 0.72
 -3 -7 7 13.1 1.68
 3 -7 -7 11.6 0.66
 -3 7 7 14.26 0.68
 -3 7 7 13.35 0.59
 -3 7 7 12.91 0.7
 -3 7 7 13.06 0.7
 -2 -7 7 0.38 0.2
 -2 7 7 -0.13 0.16
 -2 7 7 0.14 0.19
 -2 7 7 0.15 0.14
 2 7 -7 0.12 0.2
 -2 7 7 0.13 0.19
 1 7 -7 4.66 0.45
 1 7 -7 3.98 0.46
 -1 7 7 4.14 0.44
 -1 7 7 4.55 0.45
 -1 7 7 4 0.34
 1 7 -7 4.56 0.59
 -1 7 7 4.39 0.43
 0 -7 7 0.29 0.19
 0 -7 7 0.03 0.16
 0 -7 7 -0.07 0.2
 0 -7 7 0.15 0.1
 0 -7 7 0.04 0.18
 0 -7 7 0.19 0.18
 0 -7 -7 -0.09 0.18
 0 -7 7 -0.05 0.2
 0 7 -7 0.2 0.18
 0 7 -7 0.12 0.2
 0 7 -7 -0.01 0.18
 0 7 7 0.11 0.16
 0 7 7 0.28 0.2
 0 7 7 0.06 0.16
 0 7 7 0.28 0.23
 -1 -7 -7 19.21 0.7
 1 -7 7 19.54 0.86
 1 -7 7 18.52 0.76
 1 -7 7 18.78 0.82
 1 -7 7 18.43 0.65
 1 -7 7 20.18 0.91
 1 -7 7 20.07 0.94
 1 -7 7 19.23 0.83
 1 7 7 18.74 0.84
 1 7 7 21.8 0.82
 1 7 7 20.09 0.86
 -1 7 -7 20.38 1.13
 -1 7 -7 21.05 0.88
 -1 7 -7 19.76 0.86
 2 -7 7 42.68 1.34
 2 -7 7 42.15 1.42
 2 -7 7 43.43 1.23
 -2 -7 -7 41.5 1.13
 2 -7 7 44.79 1.4
 2 -7 7 43.73 1.54
 2 -7 7 43.25 1.51
 -2 7 -7 45.96 1.51
 -2 7 -7 46.31 1.44
 2 7 7 46.66 1.36
 -2 7 -7 44.45 1.89
 2 7 7 45.08 1.75
 2 7 7 44.45 1.42
 2 7 7 46.74 1.39
 -2 7 -7 44.54 1.45
 2 7 7 44.33 1.41
 3 -7 7 5.52 0.41
 3 -7 7 4.99 0.47
 3 -7 7 5.58 0.52
 3 -7 7 5.06 0.46
 -3 -7 -7 4.59 1.25
 3 -7 7 5.37 0.48
 3 -7 7 6.65 0.63
 3 -7 7 5.46 0.25
 -3 7 -7 6.38 0.57
 -3 7 -7 6.69 0.46
 3 7 7 5.29 0.47
 3 7 7 6.36 0.42
 3 7 7 5.92 0.51
 -3 7 -7 6.12 0.48
 -3 7 -7 5.16 0.46
 -3 7 -7 5.9 0.51
 3 7 7 4.84 0.49
 3 7 7 6.1 0.48
 4 -7 7 14.22 0.48
 -4 -7 -7 13.12 1.58
 4 -7 7 13.55 0.76
 4 -7 7 14.22 0.64
 4 -7 7 14.23 0.73
 4 -7 7 14.2 0.7
 4 -7 7 11.96 0.67
 -4 7 -7 14.06 0.7
 4 7 7 14.74 0.65
 4 7 7 14.28 0.71
 4 7 7 14.1 0.82
 -4 7 -7 14.3 0.65
 4 7 7 12.81 0.77
 4 7 7 13.97 0.7
 5 -7 7 0.23 0.2
 -5 -7 -7 -0.1 0.17
 5 -7 7 -0.03 0.17
 -5 -7 -7 0.08 0.15
 5 -7 7 -0.07 0.18
 5 -7 7 0.29 0.12
 5 -7 7 0.07 0.2
 5 7 7 0.17 0.14
 -5 7 -7 0.09 0.22
 5 7 7 0.08 0.15
 -5 7 -7 0.16 0.19
 -5 7 -7 0.03 0.14
 5 7 7 -0.09 0.16
 5 7 7 0.16 0.18
 -6 -7 -7 16.03 0.64
 6 -7 7 14.7 0.75
 -6 -7 -7 14.72 1.55
 6 -7 7 17.68 0.68
 6 -7 7 15.33 0.51
 -6 7 -7 16.29 0.65
 6 7 7 16.52 0.69
 6 7 7 16.45 0.64
 6 7 7 17.01 0.7
 -6 7 -7 16.33 0.7
 6 7 7 16.05 0.83
 7 -7 7 3.71 0.38
 -7 -7 -7 4 0.27
 7 -7 7 3.69 0.32
 7 -7 7 3.89 0.21
 -7 -7 -7 2.71 0.69
 7 7 7 3.14 0.32
 -7 7 -7 4.29 0.33
 7 7 7 3.97 0.34
 7 7 7 3.75 0.26
 7 7 7 3.33 0.31
 -7 7 -7 3.89 0.23
 6 -8 -7 -0.16 0.12
 -6 -8 7 0.07 0.1
 -6 -8 7 -0.18 0.09
 -6 -8 7 0.05 0.11
 -6 8 7 0.16 0.12
 -6 8 7 0.13 0.12
 6 8 -7 -0.11 0.12
 -6 8 7 -0.11 0.11
 -6 8 7 0.06 0.14
 6 8 -7 0.1 0.13
 6 8 -7 0.07 0.12
 5 -8 -7 6.29 0.37
 5 -8 -7 6.35 0.46
 -5 -8 7 5.97 0.38
 -5 -8 7 6.39 0.5
 -5 -8 7 4.91 0.92
 5 8 -7 5.99 0.42
 -5 8 7 6.33 0.38
 5 8 -7 6.27 0.42
 -5 8 7 6.2 0.39
 -5 8 7 6.65 0.41
 -5 8 7 6.01 0.46
 5 8 -7 5.92 0.53
 -4 -8 7 11.19 1.39
 -4 -8 7 11.52 0.73
 4 -8 -7 10.98 0.63
 -4 -8 7 12.08 0.56
 4 -8 -7 11.16 0.52
 4 8 -7 12.3 0.61
 -4 8 7 12.87 0.59
 -4 8 7 12.63 0.59
 4 8 -7 12.65 0.79
 4 8 -7 12.52 0.6
 3 -8 -7 3.02 0.33
 -3 -8 7 2.89 0.33
 3 -8 -7 2.48 0.37
 -3 -8 7 2.8 0.41
 -3 -8 7 3.34 0.26
 3 -8 -7 2.94 0.4
 -3 8 7 3.54 0.36
 -3 8 7 3.52 0.29
 3 8 -7 3.32 0.39
 -3 8 7 3.14 0.35
 3 8 -7 3.04 0.46
 3 8 -7 3.32 0.37
 -2 -8 7 4 0.25
 -2 -8 7 3.74 0.32
 2 -8 -7 4.69 0.36
 2 8 -7 4.71 0.41
 -2 8 7 3.84 0.36
 -2 8 7 3.72 0.42
 -2 8 7 3.84 0.38
 2 8 -7 4.97 0.54
 2 8 -7 5.14 0.42
 1 8 -7 3.08 0.37
 1 8 -7 2.86 0.37
 -1 8 7 4.06 0.4
 1 8 -7 3.86 0.49
 -1 8 7 4.17 0.4
 -1 8 7 3.84 0.28
 -1 8 7 3.67 0.38
 0 -8 7 5.65 0.42
 0 -8 7 5.22 0.42
 0 -8 7 6.13 0.35
 0 -8 -7 5.8 0.35
 0 8 -7 6.68 0.45
 0 8 -7 6.61 0.48
 0 8 7 6.26 0.47
 0 8 7 6.53 0.39
 0 8 7 5.94 0.48
 0 8 -7 6.45 0.57
 0 8 7 5.41 0.47
 1 -8 7 4.83 0.43
 1 -8 7 3.97 0.46
 1 -8 7 5.17 0.42
 -1 -8 -7 4.88 0.27
 1 -8 7 5.19 0.37
 1 -8 7 4.92 0.47
 1 -8 7 5.46 0.44
 1 8 7 5.43 0.44
 -1 8 -7 5.63 0.51
 -1 8 -7 4.81 0.44
 1 8 7 5.06 0.49
 1 8 7 5.96 0.46
 1 8 7 5.49 0.4
 -1 8 -7 5.98 0.41
 2 -8 7 10.9 0.62
 -2 -8 -7 12.24 0.53
 2 -8 7 11.63 0.41
 2 -8 7 11.83 0.56
 2 -8 7 11.02 0.67
 2 -8 7 11.18 0.6
 -2 8 -7 12.43 0.55
 2 8 7 12.45 0.62
 2 8 7 12.55 0.56
 2 8 7 11.58 0.62
 -2 8 -7 12.43 0.7
 -2 8 -7 13.05 0.65
 -2 8 -7 12.68 0.61
 -3 -8 -7 16.31 1.76
 3 -8 7 17.09 0.8
 3 -8 7 17.39 0.58
 3 -8 7 16.64 0.8
 3 -8 7 17.21 0.7
 -3 -8 -7 17.02 0.55
 3 -8 7 16.52 0.72
 3 8 7 17.7 0.71
 -3 8 -7 19.18 0.77
 -3 8 -7 17.83 0.7
 3 8 7 18.18 0.75
 3 8 7 17.4 0.74
 4 -8 7 2.51 0.34
 4 -8 7 1.81 0.3
 4 -8 7 2.32 0.25
 -4 -8 -7 1.87 0.27
 4 -8 7 2.5 0.37
 4 8 7 1.99 0.29
 -4 8 -7 2.33 0.35
 -4 8 -7 2.09 0.31
 4 8 7 2.36 0.32
 4 8 7 2.62 0.31
 -4 8 -7 2.44 0.26
 5 -8 7 9.78 0.51
 -5 -8 -7 10.09 0.47
 5 -8 7 9.27 0.55
 -5 -8 -7 8.73 1.12
 5 -8 7 9.29 0.4
 -5 8 -7 10.4 0.48
 5 8 7 9.74 0.5
 5 8 7 10.66 0.49
 5 8 7 9.42 0.48
 -5 8 -7 9.96 0.48
 6 -8 7 1.58 0.23
 6 -8 7 1.27 0.17
 -6 -8 -7 0.93 0.14
 -6 8 -7 1.22 0.17
 -6 8 -7 1.06 0.2
 6 8 7 1.08 0.19
 6 8 7 1.2 0.19
 6 8 7 1.06 0.17
 3 -9 -7 0.04 0.14
 -3 -9 7 0.25 0.09
 3 -9 -7 -0.03 0.08
 -3 -9 7 0.04 0.15
 -3 9 7 0.09 0.12
 3 9 -7 0.02 0.1
 3 9 -7 -0.04 0.1
 3 9 -7 0.02 0.13
 -3 9 7 0.2 0.13
 2 9 -7 0.06 0.12
 2 9 -7 0.22 0.15
 -2 9 7 0.05 0.12
 2 9 -7 0.07 0.11
 -2 9 7 0.23 0.11
 -2 9 7 0.15 0.14
 1 -9 -7 3.1 0.29
 -1 -9 7 3.11 0.24
 -1 9 7 3.1 0.28
 -1 9 7 3.5 0.32
 1 9 -7 3.45 0.32
 1 9 -7 3 0.33
 1 9 -7 3.01 0.26
 -1 9 7 3.23 0.3
 0 -9 7 8.59 0.41
 0 -9 -7 8.04 0.4
 0 -9 7 8.87 0.37
 0 -9 7 9.42 0.49
 0 9 7 8.78 0.45
 0 9 -7 8.44 0.38
 0 9 7 7.93 0.46
 0 9 7 9.25 0.46
 0 9 -7 8.84 0.47
 0 9 -7 8.36 0.49
 -1 -9 -7 1.69 0.2
 1 -9 7 1.63 0.24
 1 -9 7 2.01 0.29
 1 -9 7 2.04 0.27
 -1 -9 -7 2.3 0.35
 1 9 7 2.49 0.3
 -1 9 -7 2.18 0.29
 1 9 7 1.97 0.19
 1 9 7 2.21 0.29
 1 9 7 2.06 0.28
 -1 9 -7 2.67 0.3
 2 -9 7 3.72 0.33
 2 -9 7 4.18 0.33
 2 -9 7 4.5 0.25
 -2 -9 -7 4.4 0.37
 2 9 7 4.59 0.38
 -2 9 -7 3.94 0.29
 2 9 7 3.97 0.33
 -2 9 -7 4.57 0.35
 2 9 7 4.33 0.26
 2 9 7 3.83 0.3
 3 -9 7 3.09 0.24
 -3 -9 -7 3.41 0.29
 3 -9 7 3.32 0.31
 -3 -9 -7 3.22 0.3
 3 9 7 3.26 0.24
 -3 9 -7 3.05 0.23
 3 9 7 2.94 0.28
 3 9 7 3.25 0.33
 -3 9 -7 3.37 0.33
 3 9 7 3.54 0.29
 -3 9 -7 3.54 0.28
 -11 0 8 9.66 0.49
 -11 0 8 9.26 0.49
 -11 0 8 10.09 0.55
 -11 0 8 10.39 0.49
 -10 0 8 10.45 0.62
 -10 0 8 10.56 0.38
 -10 0 8 11.09 0.57
 -10 0 8 10.45 0.58
 -10 0 8 10.95 0.58
 -9 0 8 10.78 0.62
 -9 0 8 11.26 0.63
 -9 0 8 11.22 0.66
 -9 0 8 11.99 0.62
 -9 0 8 11.2 0.43
 -8 0 8 3.35 0.4
 -8 0 8 2.76 0.39
 -8 0 8 2.68 0.33
 8 0 -8 2.5 0.26
 -8 0 8 2.82 0.4
 -8 0 8 2.79 0.22
 -7 0 8 7.23 0.5
 7 0 -8 8.68 0.41
 7 0 -8 8.61 0.37
 -7 0 8 7.48 0.54
 -6 0 8 21.85 0.91
 6 0 -8 23.28 0.71
 5 0 -8 84.76 2.17
 -5 0 8 86.94 2.42
 -5 0 8 85.36 2.31
 -4 0 8 1.35 0.21
 -4 0 8 1.32 0.21
 -3 0 8 31.42 1.01
 -2 0 8 3.55 0.26
 -1 0 8 770.88 18.37
 1 0 -8 761.03 18.75
 0 0 8 457.5 11.03
 0 0 -8 454.33 11.25
 -1 0 -8 310.89 7.69
 1 0 8 304.46 7.53
 2 0 8 4.05 0.28
 -2 0 -8 4.49 0.27
 3 0 8 3.39 0.27
 4 0 8 7.48 0.42
 4 0 8 8.38 0.45
 5 0 8 0.41 0.17
 7 0 8 15.82 0.77
 -7 0 -8 14.98 0.63
 7 0 8 15.91 0.99
 7 0 8 14.31 0.76
 8 0 8 8.41 0.57
 -8 0 -8 8.97 0.55
 8 0 8 8.69 0.74
 8 0 8 8.68 0.62
 -8 0 -8 7.87 0.41
 9 0 8 3.98 0.47
 -9 0 -8 3.66 0.38
 9 0 8 4.03 0.41
 9 0 8 4.19 0.53
 10 0 8 21.57 0.91
 10 0 8 22.3 0.87
 -10 0 -8 23.07 0.79
 10 0 8 21.6 1.11
 11 0 8 21.53 0.93
 11 0 8 20.97 0.71
 -11 0 -8 21.22 0.61
 -11 -1 8 0.18 0.15
 -11 -1 8 0.25 0.15
 -11 -1 8 0.18 0.09
 -11 -1 8 0.22 0.15
 -11 1 8 0.25 0.15
 -11 1 8 0.24 0.15
 -11 1 8 0.47 0.17
 -11 1 8 0.24 0.07
 -11 1 8 0.11 0.09
 -10 -1 8 2.48 0.33
 -10 -1 8 2.65 0.3
 -10 -1 8 2.53 0.16
 -10 -1 8 2.71 0.35
 -10 -1 8 2.5 0.34
 -10 1 8 2.52 0.36
 -10 1 8 2.17 0.32
 -10 1 8 2.85 0.35
 -10 1 8 2.85 0.35
 -10 1 8 2.47 0.21
 -9 -1 8 10.12 0.37
 -9 -1 8 10.69 0.62
 -9 -1 8 10.72 0.6
 -9 -1 8 9.58 0.57
 -9 -1 8 10.53 0.61
 -9 1 8 10.09 0.6
 -9 1 8 9.98 0.64
 -9 1 8 11.11 0.64
 -9 1 8 9.61 0.43
 -9 1 8 11.07 0.61
 8 -1 -8 0.42 0.18
 -8 -1 8 0.57 0.11
 -8 -1 8 0.45 0.23
 -8 -1 8 0.27 0.19
 -8 -1 8 0.45 0.25
 -8 1 8 0.68 0.27
 -8 1 8 0.38 0.12
 -8 1 8 0.22 0.19
 -8 1 8 0.41 0.15
 -8 1 8 0.32 0.2
 -8 1 8 0.37 0.26
 7 -1 -8 5.39 0.46
 7 -1 -8 4.68 0.34
 7 -1 -8 5.27 0.31
 -7 -1 8 4.67 0.44
 -7 1 8 4.51 0.42
 -7 1 8 4.59 0.44
 -7 1 8 5.11 0.29
 7 1 -8 4.76 0.27
 -7 1 8 5.3 0.46
 -7 1 8 3.95 0.38
 6 -1 -8 55.29 1.58
 6 -1 -8 55.04 1.49
 -6 1 8 55.31 1.78
 6 1 -8 55.36 1.47
 5 -1 -8 1.14 0.11
 5 -1 -8 1.28 0.14
 -5 1 8 1.35 0.24
 -4 -1 8 195.21 5.11
 4 -1 -8 211.29 5.1
 -4 1 8 197.08 4.87
 -4 1 8 207.57 4.95
 -4 1 8 197.8 5.15
 -4 1 8 204.3 4.69
 3 -1 -8 4.84 0.21
 -3 -1 8 4.52 0.3
 -3 1 8 5.01 0.31
 -3 1 8 4.55 0.32
 2 -1 -8 3.11 0.17
 -2 -1 8 2.98 0.25
 -2 1 8 3.47 0.24
 -2 1 8 3.11 0.25
 -1 -1 8 2.85 0.24
 1 -1 -8 3.95 0.2
 -1 1 8 3.64 0.25
 -1 1 8 3.87 0.25
 0 -1 -8 219.61 5.62
 0 -1 8 228.14 5.56
 0 1 8 222.48 5.7
 0 1 -8 238.99 5.79
 0 1 8 231.9 5.5
 -1 -1 -8 215.26 5.51
 1 -1 8 220.52 5.44
 1 1 8 233.05 5.4
 1 1 8 216.97 5.6
 -1 1 -8 232.04 5.75
 2 -1 8 11.31 0.51
 -2 -1 -8 12.4 0.5
 2 1 8 10.68 0.46
 -2 1 -8 12.56 0.5
 3 -1 8 52.38 1.55
 3 -1 8 51.61 1.34
 -3 1 -8 53.11 1.55
 3 1 8 50.25 1.46
 4 -1 8 21.15 0.8
 4 -1 8 22.14 0.84
 -4 1 -8 23.25 0.79
 5 -1 8 1.36 0.18
 5 -1 8 1.8 0.25
 5 -1 8 1.46 0.26
 -5 1 -8 1.38 0.22
 6 -1 8 10.91 0.62
 6 -1 8 11.26 0.62
 6 -1 8 11.56 0.45
 6 -1 8 11 0.62
 7 -1 8 32.64 1.18
 7 -1 8 32.52 1.23
 7 -1 8 32.32 1.54
 -7 -1 -8 32.75 1.2
 7 -1 8 31.25 1.2
 -7 -1 -8 33.39 1.01
 -7 1 -8 32.42 1.04
 7 1 8 34.21 1.59
 -7 1 -8 30.49 0.87
 7 1 8 33.14 1.22
 7 1 8 34.02 1.24
 8 -1 8 3.12 0.49
 -8 -1 -8 3.51 0.39
 8 -1 8 3.51 0.4
 8 -1 8 3.21 0.43
 8 1 8 3.21 0.53
 -8 1 -8 3.33 0.4
 8 1 8 3.7 0.46
 -8 1 -8 3.29 0.31
 8 1 8 3.49 0.42
 9 -1 8 0.17 0.18
 9 -1 8 0.12 0.19
 -9 -1 -8 0.07 0.17
 9 -1 8 0.34 0.2
 9 1 8 0.22 0.21
 -9 1 -8 0.13 0.19
 9 1 8 0.36 0.24
 9 1 8 0.21 0.19
 10 -1 8 9.87 0.61
 10 -1 8 10.5 0.69
 -10 -1 -8 10.42 0.49
 10 -1 8 9.42 0.52
 -10 1 -8 9.55 0.51
 10 1 8 10.59 0.71
 10 1 8 10.63 0.56
 11 -1 8 3.61 0.32
 11 -1 8 3.72 0.24
 11 -1 8 3.33 0.34
 -11 -1 -8 3.59 0.2
 11 1 8 3.53 0.34
 11 1 8 3.54 0.27
 -11 1 -8 3.33 0.24
 -11 -2 8 3.95 0.29
 -11 -2 8 3.92 0.31
 -11 -2 8 4.06 0.29
 -11 2 8 4 0.31
 -11 2 8 3.7 0.33
 -11 2 8 4.27 0.2
 -11 2 8 3.78 0.31
 -11 2 8 4.11 0.31
 10 -2 -8 -0.04 0.14
 -10 -2 8 0.05 0.16
 -10 -2 8 0.01 0.17
 -10 -2 8 0.03 0.08
 -10 -2 8 -0.1 0.15
 -10 2 8 0.06 0.1
 -10 2 8 0.11 0.1
 -10 2 8 -0.07 0.16
 -10 2 8 -0.03 0.16
 -10 2 8 0.2 0.18
 -9 -2 8 2.41 0.34
 -9 -2 8 2.14 0.17
 9 -2 -8 1.49 0.33
 -9 -2 8 1.98 0.31
 -9 -2 8 2.13 0.28
 -9 -2 8 3.18 0.38
 -9 2 8 2.5 0.36
 -9 2 8 2.07 0.23
 -9 2 8 2.82 0.34
 -9 2 8 2.11 0.34
 -9 2 8 2.05 0.32
 -8 -2 8 12.73 0.64
 -8 -2 8 12.76 0.66
 8 -2 -8 10.85 0.58
 -8 -2 8 12.03 0.41
 -8 -2 8 11.7 0.65
 8 -2 -8 13.29 0.77
 -8 2 8 12.81 0.68
 -8 2 8 10.84 0.61
 -8 2 8 13.18 0.68
 -8 2 8 13.13 0.67
 -8 2 8 11.69 0.5
 -8 2 8 10.95 0.71
 -8 2 8 12.94 0.75
 -7 -2 8 22.07 0.84
 -7 -2 8 23.48 0.87
 -7 -2 8 21.71 0.61
 -7 -2 8 21.61 0.87
 7 -2 -8 23.92 1.03
 7 -2 -8 21.88 0.82
 -7 2 8 23 0.9
 -7 2 8 22.82 0.88
 -7 2 8 22.35 0.7
 -7 2 8 23.22 0.89
 -7 2 8 20.8 0.92
 -7 2 8 20.54 1.01
 -7 2 8 21.23 0.59
 -7 2 8 22.22 0.72
 6 -2 -8 9.73 0.45
 6 -2 -8 10.17 0.62
 6 -2 -8 9.72 0.49
 6 -2 -8 10.44 0.54
 -6 2 8 9.58 0.58
 -6 2 8 10.02 0.53
 5 -2 -8 25.52 0.79
 5 -2 -8 23.35 0.83
 -5 2 8 25.69 1.02
 -5 2 8 25.78 0.91
 -5 2 8 26.51 0.96
 4 -2 -8 2.4 0.18
 4 -2 -8 2.45 0.21
 -4 2 8 2.42 0.24
 -4 2 8 2.57 0.29
 -4 2 8 1.97 0.24
 -4 2 8 2.45 0.28
 3 -2 -8 58.96 1.6
 -3 -2 8 55.35 1.61
 -3 2 8 59.44 1.66
 -3 2 8 58.83 1.57
 -3 2 8 57.99 1.65
 -3 2 8 57.28 1.72
 2 -2 -8 1.59 0.17
 -2 -2 8 1.25 0.18
 -2 2 8 1.35 0.17
 -2 2 8 1.31 0.2
 -2 2 8 1.4 0.19
 1 -2 -8 36.2 1.06
 -1 -2 8 36.14 1.01
 -1 -2 8 34 1.08
 -1 2 8 35.58 1.1
 -1 2 8 36.03 1.08
 0 -2 8 5.98 0.32
 0 -2 -8 5.82 0.31
 0 -2 8 5.42 0.33
 0 2 8 5.56 0.31
 0 2 8 5.3 0.31
 -1 -2 -8 0.63 0.14
 1 -2 8 0.33 0.13
 1 -2 8 0.31 0.12
 -1 2 -8 0.41 0.13
 1 2 8 0.37 0.12
 1 2 8 0.52 0.13
 2 -2 8 10.15 0.44
 2 -2 8 10.23 0.51
 -2 -2 -8 11.15 0.49
 -2 -2 -8 10.41 0.44
 2 2 8 10.73 0.44
 -2 2 -8 11.46 0.51
 3 -2 8 3.26 0.26
 3 -2 8 3.14 0.29
 3 -2 8 3.26 0.3
 3 -2 8 2.89 0.25
 -3 2 -8 3.52 0.27
 4 -2 8 1.91 0.22
 4 -2 8 2.78 0.29
 4 -2 8 2.05 0.27
 4 -2 8 1.66 0.22
 -4 2 -8 2.21 0.24
 5 -2 8 2.26 0.3
 5 -2 8 2.52 0.31
 5 -2 8 2.3 0.22
 -5 2 -8 3.11 0.29
 6 -2 8 12.49 0.47
 6 -2 8 11.88 0.67
 6 -2 8 11.64 0.68
 6 -2 8 12.28 0.68
 -6 2 -8 12.33 0.62
 7 -2 8 0.24 0.2
 -7 -2 -8 0.38 0.16
 7 -2 8 0.34 0.21
 7 -2 8 0.21 0.18
 -7 -2 -8 0.29 0.21
 7 -2 8 0.31 0.22
 -7 -2 -8 0.6 0.22
 7 -2 8 0.57 0.24
 -7 2 -8 0.27 0.15
 -7 2 -8 0.36 0.2
 7 2 8 0.2 0.23
 7 2 8 0.07 0.2
 8 -2 8 0.22 0.23
 8 -2 8 -0.01 0.18
 8 -2 8 0.1 0.22
 -8 -2 -8 0.35 0.19
 -8 -2 -8 -0.05 0.19
 8 -2 8 0 0.16
 -8 2 -8 0.11 0.15
 8 2 8 0 0.19
 8 2 8 0.18 0.18
 -9 -2 -8 0.91 0.21
 9 -2 8 1.34 0.29
 9 -2 8 0.6 0.22
 9 -2 8 0.71 0.2
 -9 -2 -8 1.19 0.25
 -9 2 -8 0.52 0.23
 9 2 8 0.86 0.23
 -9 2 -8 0.97 0.24
 9 2 8 0.84 0.27
 10 -2 8 0.18 0.16
 -10 -2 -8 0.19 0.13
 10 -2 8 0.43 0.22
 10 -2 8 0.28 0.14
 10 2 8 0.37 0.16
 -10 2 -8 0.51 0.18
 10 2 8 0.31 0.19
 11 -2 8 2.44 0.29
 -11 -2 -8 2.24 0.26
 11 -2 8 2.87 0.29
 11 2 8 2.94 0.23
 11 2 8 2.24 0.28
 -11 2 -8 2.47 0.21
 10 -3 -8 1.41 0.2
 -10 -3 8 1.34 0.22
 -10 -3 8 1.86 0.26
 -10 -3 8 1.01 0.23
 10 -3 -8 1.63 0.27
 -10 3 8 1.43 0.2
 -10 3 8 1.24 0.24
 -10 3 8 1.84 0.3
 -10 3 8 1.33 0.23
 -10 3 8 1.45 0.25
 -9 -3 8 0.12 0.1
 -9 -3 8 0.02 0.17
 9 -3 -8 0 0.15
 9 -3 -8 0.03 0.13
 -9 -3 8 -0.04 0.16
 -9 -3 8 0.01 0.06
 -9 -3 8 -0.02 0.16
 9 -3 -8 0.03 0.21
 -9 3 8 -0.02 0.17
 -9 3 8 -0.04 0.1
 -9 3 8 0 0.1
 -9 3 8 -0.14 0.17
 -9 3 8 -0.09 0.18
 -9 3 8 0.11 0.18
 8 -3 -8 2.78 0.42
 -8 -3 8 2.41 0.34
 -8 -3 8 2.63 0.31
 -8 -3 8 2.52 0.36
 -8 -3 8 2.66 0.19
 8 -3 -8 2.29 0.26
 -8 -3 8 2.21 0.34
 -8 3 8 1.81 0.3
 -8 3 8 2.38 0.26
 -8 3 8 2.38 0.18
 -8 3 8 2.86 0.38
 -8 3 8 2.8 0.38
 -8 3 8 2.46 0.38
 7 -3 -8 -0.11 0.13
 7 -3 -8 0.1 0.16
 -7 -3 8 0.09 0.08
 7 -3 -8 0.15 0.18
 7 -3 -8 -0.09 0.17
 7 -3 -8 0.21 0.19
 -7 -3 8 0.07 0.18
 -7 -3 8 -0.02 0.17
 -7 3 8 0.04 0.12
 -7 3 8 0.26 0.15
 -7 3 8 0.09 0.21
 -7 3 8 0.27 0.21
 -7 3 8 -0.03 0.18
 -7 3 8 0.03 0.17
 -7 3 8 -0.07 0.09
 -7 3 8 0.1 0.19
 -7 3 8 0.01 0.11
 6 -3 -8 3.67 0.34
 6 -3 -8 4.04 0.42
 6 -3 -8 3.91 0.32
 6 -3 -8 4.22 0.36
 6 -3 -8 4.32 0.38
 -6 3 8 3.82 0.29
 -6 3 8 3.37 0.38
 -6 3 8 4.04 0.37
 -6 3 8 3.69 0.42
 -6 3 8 4.16 0.41
 -6 3 8 3.62 0.33
 -6 3 8 4.4 0.46
 5 -3 -8 13.59 0.59
 5 -3 -8 13.99 0.72
 5 -3 -8 14.56 0.64
 5 -3 -8 15.14 0.65
 -5 3 8 14.4 0.69
 -5 3 8 14.69 0.67
 4 -3 -8 11.3 0.49
 4 -3 -8 11.2 0.52
 4 -3 -8 11.45 0.53
 -4 3 8 11.55 0.62
 -4 3 8 12.49 0.6
 -4 3 8 11.32 0.55
 3 -3 -8 2.6 0.24
 3 -3 -8 2.86 0.23
 -3 3 8 2.86 0.3
 -3 3 8 2.96 0.26
 -3 3 8 3.32 0.31
 -3 3 8 2.92 0.31
 2 -3 -8 0.44 0.13
 2 -3 -8 0.76 0.16
 -2 -3 8 0.48 0.14
 -2 3 8 0.65 0.17
 -2 3 8 0.45 0.15
 -2 3 8 0.41 0.13
 -2 3 8 0.37 0.15
 -1 -3 8 0.4 0.14
 1 -3 -8 0.6 0.14
 -1 -3 8 0.39 0.15
 1 -3 -8 0.58 0.15
 -1 -3 8 0.9 0.17
 -1 3 8 0.54 0.14
 -1 3 8 0.51 0.13
 -1 3 8 0.5 0.15
 0 -3 -8 19.27 0.65
 0 -3 8 17 0.64
 0 -3 8 16.82 0.62
 0 -3 8 17.33 0.7
 0 -3 -8 17.17 0.67
 0 3 8 16.67 0.65
 0 3 8 18.59 0.68
 -1 -3 -8 6.93 0.36
 1 -3 8 7.01 0.38
 1 -3 8 7.36 0.38
 1 -3 8 6.57 0.39
 -1 -3 -8 6.84 0.4
 1 -3 8 7 0.42
 1 3 8 7.74 0.4
 -1 3 -8 7.27 0.4
 2 -3 8 0.21 0.12
 2 -3 8 0.28 0.13
 2 -3 8 0.26 0.14
 2 -3 8 0.1 0.13
 -2 3 -8 0.18 0.12
 -2 3 -8 0.37 0.14
 2 3 8 0.21 0.11
 3 -3 8 71.28 2.03
 3 -3 8 72.59 1.85
 3 -3 8 73.8 2.16
 3 -3 8 72.53 1.89
 -3 3 -8 78.78 2.1
 4 -3 8 0.55 0.17
 4 -3 8 0.29 0.15
 4 -3 8 0.62 0.2
 4 -3 8 0.69 0.2
 -4 3 -8 0.36 0.16
 5 -3 8 2.91 0.32
 5 -3 8 3.52 0.38
 5 -3 8 4.01 0.39
 5 -3 8 3.84 0.32
 5 -3 8 3.79 0.46
 5 -3 8 3.59 0.4
 -5 3 -8 4.59 0.38
 6 -3 8 4.83 0.48
 6 -3 8 5.75 0.48
 6 -3 8 5.3 0.42
 -6 -3 -8 6.05 0.45
 6 -3 8 5.82 0.5
 6 -3 8 5.33 0.53
 -6 3 -8 6.14 0.46
 -6 3 -8 5.88 0.42
 -6 3 -8 6.15 0.49
 6 3 8 5.52 0.64
 6 3 8 5.32 0.5
 7 -3 8 1.68 0.38
 7 -3 8 1.58 0.33
 7 -3 8 1.61 0.33
 -7 -3 -8 1.55 0.29
 7 -3 8 2.49 0.39
 7 -3 8 1.93 0.31
 -7 -3 -8 1.49 0.3
 7 3 8 1.7 0.32
 7 3 8 2.17 0.49
 -7 3 -8 1.51 0.23
 -7 3 -8 1.59 0.28
 8 -3 8 9.62 0.69
 8 -3 8 9 0.63
 8 -3 8 9.8 0.67
 8 -3 8 9.61 0.65
 -8 -3 -8 9.29 0.55
 8 -3 8 9.62 0.53
 -8 -3 -8 9.79 0.55
 -8 3 -8 9.49 0.49
 8 3 8 9.8 0.78
 8 3 8 9.95 0.61
 -8 3 -8 8.86 0.59
 -9 -3 -8 2.61 0.29
 -9 -3 -8 2.35 0.3
 9 -3 8 1.56 0.27
 9 -3 8 2.2 0.36
 9 -3 8 2.34 0.38
 9 -3 8 1.71 0.32
 9 3 8 2.31 0.33
 9 3 8 2.45 0.43
 -9 3 -8 2.22 0.32
 10 -3 8 0.09 0.1
 -10 -3 -8 0.26 0.11
 10 -3 8 0.22 0.12
 10 -3 8 -0.11 0.17
 -10 -3 -8 0.37 0.15
 10 -3 8 0.17 0.17
 10 3 8 0.18 0.14
 -10 3 -8 0.06 0.15
 10 3 8 0.08 0.13
 10 -4 -8 0.51 0.16
 -10 -4 8 0.47 0.12
 -10 -4 8 0.52 0.15
 10 -4 -8 0.25 0.19
 -10 -4 8 0.66 0.16
 -10 4 8 0.49 0.16
 -10 4 8 0.66 0.17
 -10 4 8 0.55 0.16
 -10 4 8 0.61 0.16
 -10 4 8 0.39 0.12
 -9 -4 8 8.01 0.5
 9 -4 -8 7.07 0.37
 -9 -4 8 7.82 0.45
 9 -4 -8 7.64 0.46
 -9 -4 8 7.58 0.26
 9 -4 -8 7.63 0.56
 -9 -4 8 7.69 0.48
 -9 4 8 7.6 0.48
 -9 4 8 7.46 0.58
 -9 4 8 7 0.46
 -9 4 8 7.64 0.47
 -9 4 8 7.68 0.49
 -9 4 8 7.51 0.4
 -8 -4 8 2.54 0.37
 8 -4 -8 3.33 0.36
 8 -4 -8 2.94 0.39
 -8 -4 8 2.95 0.2
 8 -4 -8 2.92 0.4
 8 -4 -8 3.32 0.28
 8 -4 -8 2.6 0.42
 8 -4 -8 2.56 0.43
 -8 -4 8 2.79 0.36
 -8 -4 8 3.06 0.34
 -8 4 8 3.18 0.23
 -8 4 8 3.7 0.47
 -8 4 8 3.69 0.31
 -8 4 8 2.73 0.37
 -8 4 8 3.3 0.37
 -8 4 8 2.87 0.39
 7 -4 -8 21.48 0.87
 7 -4 -8 20.92 0.7
 -7 -4 8 20.87 0.63
 7 -4 -8 21.26 0.86
 7 -4 -8 19.97 1
 7 -4 -8 20.1 0.94
 7 -4 -8 20.78 0.89
 -7 -4 8 20.89 0.96
 -7 -4 8 20.45 0.85
 -7 4 8 22.99 0.9
 -7 4 8 20.86 0.78
 -7 4 8 19.85 0.89
 -7 4 8 20.24 0.77
 -7 4 8 20.96 0.7
 -7 4 8 20.05 1.1
 -7 4 8 22.13 0.88
 -7 4 8 20.2 0.86
 -7 4 8 19.82 0.93
 -6 -4 8 6.31 0.46
 -6 -4 8 5.72 0.3
 6 -4 -8 7.24 0.48
 -6 -4 8 5.51 0.46
 6 -4 -8 6.57 0.56
 6 -4 -8 7.23 0.5
 6 -4 -8 5.65 0.42
 6 -4 -8 6.52 0.36
 6 -4 -8 5.96 0.45
 -6 4 8 6.39 0.44
 -6 4 8 6.24 0.47
 -6 4 8 6.19 0.48
 -6 4 8 6.06 0.57
 -6 4 8 6.02 0.48
 -6 4 8 6.5 0.41
 -6 4 8 6.35 0.39
 -6 4 8 5.79 0.45
 -6 4 8 6.16 0.51
 5 -4 -8 25.27 0.95
 5 -4 -8 26.42 0.97
 5 -4 -8 25.87 0.93
 5 -4 -8 25.35 0.94
 5 -4 -8 24.56 1.01
 5 -4 -8 25.5 1.08
 5 -4 -8 26.1 0.77
 -5 4 8 26.78 1.07
 -5 4 8 27.72 0.88
 -5 4 8 27.08 0.99
 -5 4 8 26.21 1
 -5 4 8 25.71 1.04
 -5 4 8 26.44 0.95
 4 -4 -8 6.58 0.46
 4 -4 -8 8.05 0.46
 4 -4 -8 7.2 0.44
 4 -4 -8 7.56 0.47
 4 -4 -8 7.92 0.45
 4 -4 -8 7.94 0.36
 4 -4 -8 7.56 0.52
 -4 4 8 7.47 0.46
 -4 4 8 7.27 0.5
 3 -4 -8 21.49 0.81
 3 -4 -8 21.55 0.65
 3 -4 -8 22.97 0.91
 3 -4 -8 21.61 0.81
 3 -4 -8 21.52 0.86
 -3 4 8 22.77 0.84
 -3 4 8 21.33 0.89
 -2 -4 8 4.3 0.32
 2 -4 -8 4.36 0.35
 2 -4 -8 4.22 0.25
 2 -4 -8 4.53 0.31
 2 -4 -8 4.09 0.32
 -2 -4 8 4.61 0.33
 -2 4 8 4.14 0.35
 -2 4 8 4.38 0.32
 -2 4 8 4 0.36
 1 -4 -8 0.4 0.13
 1 -4 -8 0.51 0.17
 1 -4 -8 0.12 0.12
 1 -4 -8 0.49 0.12
 -1 -4 8 0.44 0.15
 -1 -4 8 0.4 0.14
 1 4 -8 0.09 0.12
 -1 4 8 0.71 0.18
 -1 4 8 0.19 0.11
 -1 4 8 0.65 0.17
 0 -4 8 1.67 0.23
 0 -4 -8 1.97 0.18
 0 -4 -8 1.89 0.23
 0 -4 8 1.96 0.26
 0 -4 8 1.8 0.24
 0 4 -8 1.87 0.23
 0 4 8 1.87 0.24
 1 -4 8 0.24 0.15
 1 -4 8 0.16 0.13
 1 -4 8 0.44 0.17
 -1 -4 -8 0.43 0.11
 1 -4 8 0.45 0.17
 -1 4 -8 0.63 0.17
 1 4 8 0.37 0.15
 2 -4 8 -0.01 0.13
 2 -4 8 0.12 0.15
 2 -4 8 0.03 0.12
 2 -4 8 0.13 0.12
 2 -4 8 0.12 0.15
 2 4 8 0.05 0.1
 -2 4 -8 0.49 0.16
 -2 4 -8 0.16 0.17
 3 -4 8 8.04 0.47
 3 -4 8 8.5 0.55
 3 -4 8 7.84 0.53
 3 -4 8 8.69 0.52
 3 -4 8 7.97 0.46
 -3 4 -8 9.01 0.51
 -3 4 -8 8.83 0.53
 4 -4 8 8.75 0.58
 4 -4 8 8.31 0.55
 4 -4 8 8.67 0.5
 4 -4 8 8.2 0.49
 4 -4 8 7.91 0.56
 -4 4 -8 8.06 0.51
 5 -4 8 0.86 0.25
 5 -4 8 0.83 0.23
 5 -4 8 0.93 0.2
 5 -4 8 1.21 0.3
 5 -4 8 1.09 0.23
 -5 -4 -8 0.67 0.22
 5 -4 8 1.03 0.27
 5 -4 8 0.77 0.22
 5 -4 8 1.18 0.28
 5 -4 8 1.49 0.31
 -5 4 -8 1.04 0.28
 -5 4 -8 0.86 0.26
 5 4 8 0.72 0.24
 -5 4 -8 0.97 0.24
 5 4 8 0.78 0.29
 6 -4 8 9.83 0.64
 6 -4 8 10.11 0.58
 6 -4 8 10.26 0.67
 6 -4 8 10.19 0.69
 -6 -4 -8 10.92 0.57
 6 -4 8 10.27 0.66
 6 -4 8 10.13 0.59
 6 -4 8 8.72 0.55
 6 -4 8 10.38 0.65
 -6 -4 -8 9.73 0.57
 -6 -4 -8 10.48 1.5
 6 -4 8 9.79 0.52
 -6 4 -8 9.41 0.6
 -6 4 -8 10.28 0.52
 6 4 8 9.83 0.79
 -6 4 -8 10.48 0.63
 -6 4 -8 10.1 0.62
 6 4 8 10.52 0.63
 7 -4 8 11.93 0.72
 -7 -4 -8 11.85 1.51
 -7 -4 -8 10.86 0.58
 7 -4 8 12.13 0.74
 7 -4 8 10.74 0.73
 7 -4 8 12.38 0.72
 7 -4 8 12.11 0.56
 7 -4 8 12.29 0.63
 -7 -4 -8 11.82 0.61
 -7 4 -8 12.25 0.61
 7 4 8 12.08 0.86
 -7 4 -8 10.57 0.65
 7 4 8 12.74 0.68
 -7 4 -8 11.86 0.65
 -7 4 -8 12.41 0.47
 -8 -4 -8 3.61 0.36
 8 -4 8 3.58 0.43
 -8 -4 -8 3.5 0.37
 8 -4 8 3.32 0.38
 8 -4 8 3.85 0.45
 8 -4 8 3.82 0.39
 8 -4 8 3.84 0.32
 8 4 8 3.4 0.49
 -8 4 -8 3.79 0.32
 -8 4 -8 3.56 0.38
 8 4 8 3.41 0.4
 9 -4 8 11.96 0.66
 -9 -4 -8 12.1 0.55
 9 -4 8 12.91 0.6
 -9 -4 -8 13.1 0.53
 -9 4 -8 11.43 0.6
 9 4 8 11.97 0.75
 9 4 8 12.4 0.6
 -10 -4 -8 0.51 0.1
 10 -4 8 0.51 0.18
 -10 -4 -8 0.57 0.14
 10 -4 8 0.75 0.17
 10 4 8 0.63 0.16
 -10 4 -8 0.65 0.16
 10 4 8 0.54 0.13
 -9 -5 8 1.32 0.22
 -9 -5 8 1.65 0.25
 9 -5 -8 1.3 0.19
 9 -5 -8 1.81 0.28
 9 -5 -8 1.58 0.37
 9 -5 -8 1.59 0.24
 -9 5 8 1.71 0.26
 -9 5 8 1.31 0.22
 -9 5 8 1.41 0.31
 -9 5 8 1.44 0.21
 -9 5 8 1.35 0.23
 -8 -5 8 15.08 0.66
 8 -5 -8 15.38 0.94
 8 -5 -8 14.43 0.53
 8 -5 -8 15.35 0.77
 8 -5 -8 14.22 0.69
 -8 -5 8 15.05 0.48
 -8 -5 8 16.14 0.79
 8 -5 -8 14.94 0.66
 8 -5 -8 14.08 0.75
 -8 5 8 14.86 0.66
 -8 5 8 15.33 0.6
 -8 5 8 15.53 0.68
 -8 5 8 15.2 0.9
 -8 5 8 15.42 0.5
 -8 5 8 14.64 0.62
 -8 5 8 14.68 0.68
 7 -5 -8 0.5 0.26
 -7 -5 8 0.42 0.12
 7 -5 -8 0.22 0.24
 7 -5 -8 0.14 0.2
 -7 -5 8 0.82 0.24
 7 -5 -8 0.47 0.21
 7 -5 -8 0.24 0.17
 7 -5 -8 0.56 0.16
 -7 -5 8 0.03 0.2
 -7 -5 8 0.39 0.15
 7 -5 -8 0.62 0.25
 7 -5 -8 0.64 0.26
 -7 5 8 0.63 0.23
 -7 5 8 0.57 0.19
 -7 5 8 0.79 0.25
 -7 5 8 0.71 0.22
 -7 5 8 0.29 0.17
 -7 5 8 0.44 0.23
 -7 5 8 0.45 0.16
 -6 -5 8 17.37 0.9
 6 -5 -8 17.28 0.75
 -6 -5 8 18.74 2.01
 -6 -5 8 17.95 0.76
 6 -5 -8 18.19 0.63
 -6 -5 8 17.34 0.61
 6 -5 -8 16.81 0.78
 6 -5 -8 18.06 0.8
 6 -5 -8 17.69 0.88
 -6 5 8 17.5 0.77
 -6 5 8 18.9 0.84
 -6 5 8 17.98 0.85
 -6 5 8 22.86 1.13
 -6 5 8 16.56 0.77
 -6 5 8 16.76 0.85
 -6 5 8 17.92 0.71
 -6 5 8 18.69 0.76
 -6 5 8 17.65 0.81
 -5 -5 8 15.46 1.82
 -5 -5 8 15.28 0.57
 -5 -5 8 15.07 0.7
 5 -5 -8 14.55 0.73
 -5 -5 8 14.63 0.81
 5 -5 -8 15.6 0.8
 5 -5 -8 16.5 0.76
 5 -5 -8 15.02 0.69
 5 -5 -8 15.87 0.57
 5 -5 -8 16 0.74
 5 -5 -8 15.66 0.84
 -5 5 8 16.12 0.75
 -5 5 8 15.51 0.77
 -5 5 8 15.81 0.71
 -5 5 8 15.97 0.69
 -5 5 8 15.74 0.75
 -5 5 8 16.81 0.76
 -5 5 8 16.95 0.78
 -4 5 8 5.26 0.41
 -4 5 8 4.82 0.43
 -4 5 8 4.34 0.39
 -4 5 8 5.27 0.44
 -4 5 8 4.86 0.31
 -4 5 8 4.21 0.43
 -4 5 8 4.61 0.46
 3 -5 -8 5.37 0.42
 3 -5 -8 5.81 0.39
 3 -5 -8 6.04 0.43
 3 -5 -8 6.06 0.42
 -3 -5 8 5.96 0.33
 3 -5 -8 5.99 0.48
 -3 -5 8 6.07 0.31
 3 -5 -8 6.09 0.33
 3 5 -8 6.86 0.49
 -3 5 8 6.23 0.46
 -3 5 8 6.08 0.43
 -3 5 8 6.49 0.39
 -3 5 8 5.64 0.47
 2 -5 -8 43.55 1.17
 2 -5 -8 48.29 1.43
 -2 -5 8 48.29 1.43
 2 -5 -8 47.34 1.56
 2 -5 -8 49.41 1.4
 2 -5 -8 47.7 1.45
 -2 5 8 47.47 1.6
 2 5 -8 48.27 1.6
 -2 5 8 49.58 1.47
 -1 -5 8 105.72 2.57
 1 -5 -8 98.73 2.45
 1 -5 -8 92.78 2.65
 -1 -5 8 96.45 2.73
 1 -5 -8 102.38 2.54
 -1 -5 8 101.23 2.47
 1 -5 -8 99.41 2.21
 -1 5 8 99.19 2.8
 1 5 -8 100.36 2.84
 -1 5 8 103.34 2.59
 0 -5 -8 0.19 0.11
 0 -5 -8 0.14 0.13
 0 -5 8 0.16 0.16
 0 -5 -8 0.27 0.14
 0 -5 8 0.15 0.19
 0 -5 8 0.1 0.16
 0 5 -8 0.26 0.18
 0 5 -8 0.14 0.13
 0 5 8 0.52 0.19
 1 -5 8 48.32 1.58
 1 -5 8 46.97 1.39
 1 -5 8 47.81 1.44
 1 -5 8 45.29 1.54
 -1 5 -8 46.16 1.58
 1 5 8 47.04 1.53
 -1 5 -8 49.89 1.48
 2 -5 8 21.99 0.9
 2 -5 8 20.56 0.93
 2 -5 8 21.31 0.94
 2 -5 8 21.85 0.85
 2 -5 8 20.86 0.85
 -2 5 -8 23.1 0.9
 -2 5 -8 20.54 0.93
 3 -5 8 4.23 0.4
 3 -5 8 3.99 0.39
 3 -5 8 3.85 0.42
 3 -5 8 3.47 0.42
 3 -5 8 4.26 0.38
 3 -5 8 4.52 0.43
 -3 5 -8 3.31 0.39
 3 5 8 3.79 0.48
 -3 5 -8 3.53 0.36
 -3 5 -8 3.66 0.43
 -3 5 -8 4.11 0.51
 4 -5 8 71.79 1.84
 4 -5 8 75.51 2.21
 4 -5 8 76.95 2.09
 -4 -5 -8 73.75 1.95
 4 -5 8 75.17 2.02
 -4 -5 -8 73.48 4.76
 4 -5 8 69.32 1.96
 4 -5 8 70.88 2.22
 4 -5 8 72.51 2.32
 4 5 8 73.96 2.83
 4 5 8 75.03 2.17
 -4 5 -8 75.25 2.03
 -4 5 -8 74.86 2.16
 -4 5 -8 72.11 2.76
 -4 5 -8 74.12 1.99
 -4 5 -8 71.1 2.1
 5 -5 8 36.29 1.45
 -5 -5 -8 35.3 2.94
 5 -5 8 37.02 1.39
 5 -5 8 38.43 1.29
 5 -5 8 39.72 1.28
 -5 -5 -8 37.19 1.2
 5 -5 8 37.39 1.14
 5 -5 8 39.8 1.41
 5 5 8 38.39 1.35
 -5 5 -8 39.12 1.3
 -5 5 -8 40.96 1.25
 5 5 8 39.48 1.77
 -5 5 -8 39.32 1.39
 6 -5 8 0.38 0.24
 6 -5 8 0.07 0.19
 -6 -5 -8 0.41 0.18
 6 -5 8 0.54 0.22
 6 -5 8 0.21 0.19
 6 -5 8 0.16 0.23
 6 -5 8 0.42 0.21
 -6 -5 -8 0.2 0.2
 -6 -5 -8 0.15 0.21
 -6 5 -8 0.36 0.22
 -6 5 -8 0.09 0.21
 6 5 8 0.18 0.18
 6 5 8 0.16 0.2
 -6 5 -8 0.16 0.16
 -6 5 -8 0.31 0.23
 7 -5 8 0.06 0.22
 7 -5 8 0.13 0.2
 -7 -5 -8 0.02 0.16
 7 -5 8 -0.15 0.21
 -7 -5 -8 0.08 0.17
 7 -5 8 0.27 0.17
 -7 -5 -8 0.47 0.19
 -7 5 -8 0.25 0.12
 -7 5 -8 0.25 0.2
 7 5 8 0.34 0.21
 7 5 8 0.09 0.17
 -7 5 -8 0.43 0.2
 8 -5 8 31.28 0.97
 8 -5 8 28.54 1.08
 -8 -5 -8 31.48 0.99
 -8 -5 -8 32.99 0.97
 -8 -5 -8 28.44 2.35
 8 5 8 29.8 1.36
 8 5 8 31.55 1.07
 -8 5 -8 31.18 0.86
 -8 5 -8 30.14 1
 9 -5 8 -0.11 0.11
 -9 -5 -8 0.09 0.1
 9 -5 8 -0.05 0.14
 -9 5 -8 -0.13 0.15
 9 5 8 0.06 0.12
 9 5 8 0 0.1
 8 -6 -8 1.22 0.19
 8 -6 -8 1.01 0.23
 -8 -6 8 1.16 0.23
 -8 -6 8 0.91 0.19
 8 -6 -8 1.4 0.32
 -8 6 8 1.19 0.2
 -8 6 8 1.39 0.16
 -8 6 8 1.28 0.22
 -8 6 8 1.12 0.2
 7 -6 -8 7.07 0.49
 -7 -6 8 5.89 1.11
 -7 -6 8 7.36 0.53
 -7 -6 8 7.67 0.47
 7 -6 -8 6.8 0.53
 7 -6 -8 7.64 0.61
 7 -6 -8 6.6 0.53
 7 -6 -8 6.78 0.42
 7 -6 -8 6.79 0.35
 -7 6 8 6.87 0.46
 -7 6 8 7.03 0.45
 -7 6 8 6 0.45
 -7 6 8 6.79 0.38
 -7 6 8 6.94 0.46
 -7 6 8 6.24 0.43
 -6 -6 8 0.8 0.19
 6 -6 -8 1.05 0.22
 6 -6 -8 1.45 0.28
 -6 -6 8 0.3 0.23
 6 -6 -8 1.6 0.3
 -6 -6 8 0.77 0.23
 6 -6 -8 0.99 0.26
 6 -6 -8 0.81 0.26
 6 -6 -8 1.59 0.22
 6 -6 -8 1.28 0.3
 -6 6 8 0.75 0.24
 -6 6 8 0.85 0.25
 -6 6 8 1.34 0.24
 -6 6 8 0.9 0.27
 -6 6 8 0.91 0.26
 5 -6 -8 2.65 0.35
 5 -6 -8 2.69 0.36
 -5 -6 8 2.72 0.37
 -5 -6 8 2.36 0.37
 5 -6 -8 2.65 0.37
 5 -6 -8 3.04 0.53
 5 -6 -8 1.75 0.35
 5 -6 -8 2.28 0.37
 5 -6 -8 2.74 0.25
 5 -6 -8 2.52 0.3
 -5 6 8 2.8 0.42
 -5 6 8 3.16 0.37
 -5 6 8 2.63 0.36
 -5 6 8 3.24 0.39
 -5 6 8 3.33 0.39
 4 -6 -8 14.61 0.66
 -4 -6 8 15.7 1.9
 -4 -6 8 15.24 0.89
 4 -6 -8 15.88 0.75
 4 -6 -8 15.45 0.8
 4 -6 -8 16.34 0.58
 4 -6 -8 16.48 0.74
 4 -6 -8 17.11 1.07
 -4 -6 8 15.67 0.72
 4 -6 -8 15.56 0.83
 -4 -6 8 15.65 0.51
 -4 6 8 17.07 0.77
 -4 6 8 16.04 0.58
 -4 6 8 17.36 0.78
 -4 6 8 17.4 0.77
 -4 6 8 15.52 0.76
 3 -6 -8 1.42 0.24
 -3 -6 8 0.96 0.23
 3 -6 -8 1.08 0.3
 3 -6 -8 1.38 0.31
 3 -6 -8 1.38 0.2
 3 -6 -8 1.18 0.25
 -3 -6 8 1.12 0.18
 -3 -6 8 1.21 0.27
 3 -6 -8 1.57 0.3
 -3 -6 8 1.2 0.17
 -3 6 8 1.72 0.42
 -3 6 8 1.27 0.22
 -3 6 8 1.26 0.26
 -3 6 8 1.62 0.32
 -3 6 8 1.29 0.27
 2 -6 -8 9.53 0.41
 2 -6 -8 9.09 0.68
 -2 -6 8 9.91 0.49
 2 -6 -8 9.69 0.54
 2 -6 -8 9.6 0.56
 2 -6 -8 10.12 0.64
 -2 -6 8 8.93 0.69
 -2 -6 8 9.77 0.47
 2 -6 -8 9.77 0.5
 -2 -6 8 8.97 0.53
 -2 -6 8 8.84 0.35
 -2 6 8 10.15 0.6
 -2 6 8 10.4 0.55
 -2 6 8 10.27 0.59
 -2 6 8 9.55 0.63
 -2 6 8 10.05 0.44
 2 6 -8 9.92 0.64
 -1 -6 8 9.71 0.54
 1 -6 -8 9.45 0.66
 -1 -6 8 9.8 0.55
 1 -6 -8 9.95 0.55
 1 -6 -8 10.48 0.64
 -1 -6 8 9.47 0.72
 1 -6 -8 9.83 0.57
 -1 -6 8 10.01 0.46
 -1 -6 8 9.06 0.49
 -1 -6 8 9.69 0.54
 -1 -6 8 9.62 0.57
 1 6 -8 10.56 0.67
 1 6 -8 10.87 0.61
 -1 6 8 10.86 0.59
 -1 6 8 10.42 0.61
 -1 6 8 10.25 0.6
 -1 6 8 9.83 0.49
 -1 6 8 9.83 0.63
 0 -6 8 117.85 2.74
 0 -6 -8 105.37 3.95
 0 -6 8 120.67 3.21
 0 -6 8 111.62 2.57
 0 -6 8 116.68 3.04
 0 -6 8 116.76 4.12
 0 -6 8 121.45 2.9
 0 -6 8 118.68 2.98
 0 -6 8 113.4 2.75
 0 6 8 117.27 3.33
 0 6 8 117.59 2.99
 0 6 8 119.4 2.84
 0 6 -8 119.87 3.4
 0 6 8 122.91 2.96
 0 6 8 123.44 2.97
 0 6 -8 127.33 3.01
 0 6 -8 112.51 3.4
 0 6 -8 129.44 4.43
 1 -6 8 21.09 0.73
 1 -6 8 21.9 0.9
 1 -6 8 22.17 0.89
 1 -6 8 23.72 1.01
 1 -6 8 21.14 0.83
 1 -6 8 21.9 0.95
 1 -6 8 20.72 0.85
 -1 6 -8 24.64 0.95
 -1 6 -8 22.71 0.97
 1 6 8 22.35 0.87
 -1 6 -8 23.79 1.26
 1 6 8 22.75 0.91
 1 6 8 22.54 0.9
 1 6 8 22.57 0.98
 -1 6 -8 21.67 0.89
 -1 6 -8 22.71 1.02
 2 -6 8 47.29 1.5
 2 -6 8 47.34 1.62
 2 -6 8 48.12 1.61
 2 -6 8 45.73 1.12
 2 -6 8 45.04 1.63
 2 -6 8 46.93 1.33
 2 -6 8 49.5 1.48
 2 -6 8 47.5 1.43
 2 6 8 49.8 1.49
 -2 6 -8 51.98 1.53
 2 6 8 47.82 1.49
 -2 6 -8 50.39 2.1
 -2 6 -8 48.4 1.58
 -2 6 -8 50.32 1.6
 2 6 8 49.11 1.95
 2 6 8 50.72 1.53
 2 6 8 49.57 1.5
 3 -6 8 46.55 1.49
 -3 -6 -8 48.47 3.47
 3 -6 8 46.01 1.36
 3 -6 8 43.88 1.18
 3 -6 8 44.78 1.44
 3 -6 8 46.11 1.61
 3 -6 8 47.21 1.46
 3 -6 8 44.67 1.63
 3 6 8 45.71 1.91
 3 6 8 45.82 1.44
 -3 6 -8 48.32 1.48
 -3 6 -8 48.16 1.51
 -3 6 -8 48.99 1.57
 -3 6 -8 45.69 1.95
 3 6 8 45.26 1.46
 3 6 8 49.6 1.51
 4 -6 8 23.52 0.89
 -4 -6 -8 25.34 0.64
 4 -6 8 23.12 0.77
 -4 -6 -8 21.99 2.21
 4 -6 8 23.55 1.02
 4 -6 8 23.66 0.97
 4 -6 8 22.61 1.06
 4 -6 8 24.33 1.06
 4 -6 8 24.36 0.95
 4 6 8 23.18 1.19
 -4 6 -8 24.94 0.93
 -4 6 -8 23.62 1.01
 -4 6 -8 26.2 1.21
 4 6 8 22.97 0.91
 -4 6 -8 23.95 0.91
 -4 6 -8 24.78 0.97
 4 6 8 22.88 0.93
 -5 -6 -8 12.52 1.59
 5 -6 8 12.81 0.68
 5 -6 8 14.17 0.58
 5 -6 8 13.65 0.68
 5 -6 8 13.17 0.72
 5 -6 8 13.6 0.76
 5 -6 8 13.52 0.75
 5 -6 8 13.35 0.79
 5 6 8 13.89 0.85
 5 6 8 12.84 0.67
 -5 6 -8 13.19 0.68
 -5 6 -8 13 0.73
 -5 6 -8 13 0.73
 -5 6 -8 13.05 0.62
 5 6 8 13.5 0.65
 6 -6 8 0.89 0.18
 6 -6 8 1.09 0.27
 6 -6 8 1.1 0.29
 6 -6 8 0.53 0.21
 6 -6 8 1.5 0.31
 6 -6 8 1.19 0.27
 -6 -6 -8 1.28 0.28
 -6 6 -8 1.11 0.2
 6 6 8 0.94 0.23
 6 6 8 0.99 0.25
 -6 6 -8 0.8 0.25
 -6 6 -8 1.04 0.26
 6 6 8 1.85 0.31
 7 -6 8 5.51 0.46
 -7 -6 -8 4.57 0.38
 7 -6 8 5.09 0.43
 7 -6 8 4.98 0.45
 -7 -6 -8 3.98 0.86
 7 -6 8 5.29 0.34
 7 6 8 4.58 0.46
 -7 6 -8 4.95 0.39
 7 6 8 4.33 0.36
 -7 6 -8 4.86 0.35
 7 6 8 4.92 0.38
 -8 -6 -8 2.87 0.67
 8 -6 8 3.36 0.25
 8 -6 8 3.65 0.34
 -8 -6 -8 3.83 0.27
 8 6 8 4.2 0.37
 8 6 8 3.69 0.31
 8 6 8 4.11 0.28
 -8 6 -8 3.88 0.32
 -7 -7 8 0.4 0.13
 7 -7 -8 0.16 0.16
 7 -7 -8 0.1 0.13
 7 -7 -8 0.45 0.12
 -7 -7 8 -0.13 0.11
 -7 -7 8 0.11 0.12
 -7 7 8 0.33 0.14
 -7 7 8 0.1 0.13
 -7 7 8 0.16 0.14
 -7 7 8 0.42 0.12
 6 -7 -8 8.57 0.56
 -6 -7 8 9.62 0.5
 6 -7 -8 9.1 0.59
 -6 -7 8 9.37 0.61
 -6 -7 8 7.73 1.2
 -6 7 8 10.9 0.49
 -6 7 8 9.27 0.51
 -6 7 8 9.9 0.52
 -6 7 8 8.88 0.52
 -5 -7 8 3.48 0.96
 -5 -7 8 3.76 0.43
 5 -7 -8 4.13 0.44
 5 -7 -8 3.96 0.44
 -5 -7 8 4.02 0.37
 5 -7 -8 4.18 0.42
 5 -7 -8 3.7 0.4
 -5 7 8 4.55 0.47
 -5 7 8 4.27 0.4
 -5 7 8 4.21 0.39
 -5 7 8 4.47 0.41
 4 -7 -8 17.32 0.93
 -4 -7 8 18.76 1.01
 4 -7 -8 18.12 0.88
 -4 -7 8 18.75 0.53
 -4 -7 8 19.42 0.78
 -4 -7 8 18 1.93
 4 -7 -8 18.4 0.83
 4 -7 -8 17.59 0.78
 -4 7 8 19.97 0.82
 -4 7 8 18.99 0.82
 -4 7 8 20.35 0.6
 -4 7 8 19.61 0.83
 -3 -7 8 0.13 0.17
 -3 -7 8 0.08 0.13
 -3 -7 8 -0.03 0.22
 -3 -7 8 0.14 0.14
 3 -7 -8 0.05 0.16
 3 -7 -8 0.04 0.17
 3 -7 -8 0.21 0.19
 3 -7 -8 0.13 0.2
 -3 7 8 0.03 0.18
 -3 7 8 0.33 0.19
 -3 7 8 0.19 0.16
 2 -7 -8 2.2 0.36
 -2 -7 8 2.79 0.27
 -2 -7 8 2.46 0.42
 -2 -7 8 2.1 0.27
 2 -7 -8 2.44 0.37
 -2 -7 8 2.28 0.34
 2 -7 -8 2.43 0.37
 2 -7 -8 2.43 0.36
 2 -7 -8 2.25 0.38
 -2 7 8 2.66 0.39
 -2 7 8 2.45 0.22
 -2 7 8 2.67 0.38
 2 7 -8 2.77 0.38
 -2 7 8 2.81 0.34
 -1 -7 8 22.72 0.7
 -1 -7 8 22.85 0.82
 -1 -7 8 23.61 1.23
 1 -7 -8 23.75 1.05
 1 -7 -8 21.45 0.85
 -1 -7 8 21.85 0.84
 -1 7 8 23.87 0.95
 -1 7 8 24.39 0.96
 1 7 -8 23.42 1.3
 1 7 -8 23.77 1.01
 -1 7 8 23.75 0.77
 1 7 -8 24.06 0.94
 0 -7 8 16.77 0.72
 0 -7 8 16.66 0.66
 0 -7 8 18.45 0.88
 0 -7 8 17.79 0.8
 0 -7 -8 17.7 0.72
 0 -7 8 17.73 0.78
 0 -7 8 16.46 0.76
 0 7 8 18.61 0.82
 0 7 -8 19.08 0.88
 0 7 -8 18.12 1.1
 0 7 8 19.36 0.72
 0 7 8 18.45 0.83
 0 7 -8 19.19 0.84
 0 7 8 19.34 0.83
 1 -7 8 26.61 0.78
 1 -7 8 26.44 1.03
 1 -7 8 26.86 1.06
 1 -7 8 28.04 1.14
 -1 -7 -8 27.66 0.89
 1 -7 8 27.1 1.01
 1 -7 8 27.24 0.93
 1 -7 8 26.53 0.97
 -1 7 -8 27.83 1.07
 -1 7 -8 28.48 1.4
 1 7 8 28.28 1.05
 -1 7 -8 28.08 1.05
 1 7 8 27.35 0.95
 1 7 8 28.88 1.05
 2 -7 8 10.48 0.58
 2 -7 8 11.22 0.69
 -2 -7 -8 9.93 0.46
 2 -7 8 10.71 0.5
 2 -7 8 11 0.64
 2 -7 8 10.44 0.66
 2 -7 8 11.78 0.63
 -2 7 -8 10.8 0.76
 2 7 8 10.27 0.6
 -2 7 -8 10.43 0.58
 -2 7 -8 10.56 0.64
 2 7 8 10.73 0.59
 -2 7 -8 11.35 0.62
 2 7 8 10.6 0.62
 3 -7 8 26.61 1.12
 3 -7 8 27.61 1.13
 3 -7 8 25.86 0.98
 3 -7 8 26.42 1.04
 -3 -7 -8 25.61 2.38
 -3 -7 -8 27.02 0.68
 3 -7 8 27.8 1.03
 3 -7 8 26.82 0.88
 -3 7 -8 28.89 0.98
 3 7 8 27.51 1.02
 -3 7 -8 27.4 1.26
 -3 7 -8 27.91 1
 3 7 8 26.84 0.99
 -3 7 -8 26.28 1
 3 7 8 27.43 1.01
 3 7 8 26.66 1.16
 3 7 8 27 0.89
 4 -7 8 0.55 0.23
 4 -7 8 0.68 0.12
 4 -7 8 0.39 0.26
 4 -7 8 1.07 0.27
 -4 -7 -8 0.19 0.19
 4 -7 8 0.47 0.2
 4 -7 8 0.38 0.23
 4 7 8 0.68 0.16
 4 7 8 0.84 0.25
 -4 7 -8 0.72 0.25
 -4 7 -8 0.67 0.22
 4 7 8 0.61 0.25
 4 7 8 0.72 0.23
 4 7 8 0.73 0.2
 5 -7 8 5.19 0.48
 5 -7 8 3.63 0.44
 -5 -7 -8 3.25 0.84
 5 -7 8 4.2 0.37
 -5 -7 -8 3.96 0.4
 5 -7 8 4.16 0.4
 5 -7 8 3.9 0.23
 5 7 8 4.2 0.42
 5 7 8 4.28 0.41
 -5 7 -8 4.09 0.44
 5 7 8 4.7 0.41
 -5 7 -8 4.16 0.39
 5 7 8 4.67 0.44
 5 7 8 4.1 0.32
 -5 7 -8 4.25 0.33
 6 -7 8 0.88 0.2
 -6 -7 -8 0.6 0.19
 6 -7 8 0.58 0.23
 -6 -7 -8 0.21 0.16
 6 -7 8 0.38 0.1
 6 7 8 0.47 0.19
 -6 7 -8 0.9 0.21
 6 7 8 0.62 0.22
 6 7 8 0.41 0.17
 -6 7 -8 0.22 0.17
 6 7 8 0.38 0.14
 6 7 8 0.57 0.14
 7 -7 8 0.45 0.16
 -7 -7 -8 0.64 0.14
 7 7 8 0.78 0.19
 -7 7 -8 0.68 0.12
 7 7 8 0.67 0.18
 -7 7 -8 0.57 0.16
 7 7 8 0.61 0.17
 6 -8 -8 2.93 0.26
 -6 -8 8 2.48 0.24
 -6 -8 8 2.8 0.29
 -6 8 8 2.73 0.22
 6 8 -8 3.12 0.34
 6 8 -8 2.47 0.28
 -6 8 8 2.51 0.25
 6 8 -8 2.68 0.25
 -6 8 8 2.89 0.25
 -6 8 8 2.36 0.27
 -5 -8 8 2.22 0.32
 5 -8 -8 1.59 0.27
 -5 -8 8 1.87 0.26
 5 -8 -8 2.17 0.26
 -5 8 8 2.13 0.26
 -5 8 8 2.44 0.26
 -5 8 8 2.06 0.32
 -5 8 8 2.86 0.29
 5 8 -8 2.44 0.32
 5 8 -8 2.36 0.3
 5 8 -8 1.85 0.35
 -4 -8 8 0.06 0.12
 4 -8 -8 0.07 0.16
 -4 -8 8 -0.19 0.13
 -4 -8 8 0 0.13
 4 -8 -8 -0.03 0.17
 4 8 -8 0.25 0.17
 4 8 -8 -0.05 0.15
 -4 8 8 0.01 0.14
 -4 8 8 0.23 0.16
 -4 8 8 0.02 0.17
 4 8 -8 -0.09 0.15
 -3 -8 8 0.35 0.27
 3 -8 -8 0.83 0.21
 3 -8 -8 0.8 0.25
 -3 -8 8 0.51 0.18
 -3 -8 8 0.82 0.13
 -3 8 8 0.92 0.16
 3 8 -8 0.92 0.22
 3 8 -8 0.81 0.27
 -3 8 8 0.95 0.22
 -3 8 8 0.87 0.21
 3 8 -8 1.34 0.26
 2 -8 -8 1.94 0.29
 -2 -8 8 1.89 0.24
 2 8 -8 2.3 0.34
 -2 8 8 2.1 0.31
 -2 8 8 2.09 0.33
 -2 8 8 2.12 0.29
 2 8 -8 2.12 0.33
 2 8 -8 2.32 0.42
 1 8 -8 3.08 0.36
 1 8 -8 3.05 0.38
 -1 8 8 2.44 0.35
 -1 8 8 2.87 0.22
 -1 8 8 3.03 0.34
 1 8 -8 2.92 0.44
 -1 8 8 3.13 0.38
 0 -8 8 21.79 0.81
 0 -8 -8 21.62 0.71
 0 -8 8 21.76 0.65
 0 -8 8 21.46 0.77
 0 8 -8 22.73 0.88
 0 8 8 22.69 0.87
 0 8 8 22.68 0.86
 0 8 8 22.03 0.72
 0 8 8 23.04 0.89
 0 8 -8 22.36 0.87
 0 8 -8 23.04 1.15
 -1 -8 -8 4 0.26
 1 -8 8 3.53 0.41
 1 -8 8 4.2 0.45
 1 -8 8 4.44 0.39
 1 -8 8 3.57 0.32
 1 -8 8 4.61 0.39
 1 8 8 4.81 0.43
 1 8 8 4.71 0.42
 1 8 8 3.73 0.42
 -1 8 -8 4.43 0.37
 1 8 8 4.86 0.35
 -1 8 -8 4.6 0.41
 -1 8 -8 3.85 0.45
 2 8 8 -0.06 0.16
 -2 8 -8 0.11 0.16
 2 8 8 0.15 0.15
 -2 8 -8 -0.11 0.18
 2 8 8 0.03 0.18
 2 8 8 0.35 0.24
 -2 8 -8 0.08 0.18
 -2 8 -8 0.07 0.17
 -3 -8 -8 0.16 0.22
 3 -8 8 0.34 0.19
 -3 -8 -8 0.37 0.14
 3 -8 8 0.77 0.25
 3 -8 8 0.44 0.18
 3 -8 8 0.21 0.11
 3 -8 8 0.7 0.21
 3 8 8 0.45 0.19
 3 8 8 0.31 0.2
 -3 8 -8 0.75 0.22
 -3 8 -8 0.66 0.19
 3 8 8 0.4 0.19
 4 -8 8 3.7 0.36
 4 -8 8 3.39 0.24
 -4 -8 -8 4.22 0.38
 4 -8 8 2.85 0.36
 4 -8 8 3.56 0.42
 -4 -8 -8 2.81 0.9
 4 8 8 3.11 0.33
 -4 8 -8 4.41 0.37
 -4 8 -8 3.76 0.39
 -4 8 -8 3.73 0.31
 4 8 8 3.79 0.33
 4 8 8 3.61 0.36
 5 -8 8 0.81 0.13
 5 -8 8 1.43 0.24
 5 -8 8 0.95 0.25
 -5 -8 -8 1.15 0.19
 5 -8 8 1.19 0.23
 5 8 8 0.89 0.19
 5 8 8 1.16 0.19
 -5 8 -8 0.88 0.2
 5 8 8 0.98 0.19
 -5 8 -8 1.16 0.21
 3 -9 -8 4.38 0.21
 3 -9 -8 4.53 0.33
 -3 -9 8 4.75 0.67
 3 9 -8 4.16 0.28
 -3 9 8 4.32 0.3
 3 9 -8 4.1 0.36
 -3 9 8 4.74 0.31
 3 9 -8 4.57 0.32
 -2 -9 8 7.51 0.34
 -2 -9 8 7.67 0.26
 2 -9 -8 7.6 0.41
 2 -9 -8 7.8 0.27
 2 9 -8 7.94 0.39
 -2 9 8 7.88 0.4
 2 9 -8 8.12 0.42
 2 9 -8 7.24 0.49
 -2 9 8 7.9 0.41
 -2 9 8 7.61 0.26
 1 -9 -8 0.08 0.14
 -1 -9 8 -0.06 0.09
 -1 -9 8 0.11 0.12
 1 9 -8 -0.06 0.11
 -1 9 8 0.24 0.12
 -1 9 8 0.23 0.13
 1 9 -8 -0.2 0.13
 -1 9 8 -0.01 0.13
 1 9 -8 0.14 0.11
 0 -9 8 10.19 0.48
 0 -9 8 11.35 0.44
 0 -9 -8 11.31 0.45
 0 9 -8 11.23 0.51
 0 9 8 11.89 0.51
 0 9 -8 11.29 0.45
 0 9 8 11.23 0.48
 0 9 -8 11.01 0.57
 0 9 8 11.61 0.52
 0 9 -8 11.86 0.54
 1 -9 8 2.69 0.24
 1 -9 8 2.65 0.27
 -1 -9 -8 2.9 0.23
 1 -9 8 3.2 0.32
 -1 -9 -8 2.88 0.37
 1 9 8 2.77 0.15
 -1 9 -8 3.14 0.29
 1 9 8 3.15 0.31
 1 9 8 2.94 0.29
 1 9 8 2.59 0.28
 -1 9 -8 3.03 0.3
 2 -9 8 1.97 0.28
 -2 -9 -8 2.22 0.31
 2 -9 8 2.01 0.23
 2 -9 8 2.31 0.28
 -2 9 -8 1.93 0.25
 2 9 8 1.73 0.25
 2 9 8 1.95 0.18
 2 9 8 1.98 0.28
 2 9 8 2.55 0.27
 -2 9 -8 2.1 0.28
 -3 9 -8 1.17 0.17
 3 9 8 1.07 0.18
 -3 9 -8 1.66 0.24
 3 9 8 1.33 0.16
 3 9 8 1.55 0.22
 3 9 8 1.2 0.21
 -11 0 9 0.05 0.14
 -11 0 9 0.04 0.07
 -11 0 9 -0.05 0.12
 -11 0 9 0.17 0.13
 -10 0 9 0.14 0.16
 -10 0 9 0.01 0.06
 -10 0 9 -0.01 0.08
 -10 0 9 0.36 0.18
 -10 0 9 0.25 0.17
 -9 0 9 0.1 0.18
 -9 0 9 0 0.08
 -9 0 9 0.15 0.21
 -9 0 9 0.11 0.1
 -9 0 9 0.19 0.21
 -8 0 9 -0.07 0.17
 -8 0 9 -0.02 0.18
 8 0 -9 -0.03 0.12
 -8 0 9 0 0.2
 -8 0 9 0.06 0.08
 -8 0 9 -0.05 0.1
 -7 0 9 0.01 0.16
 7 0 -9 -0.01 0.09
 -7 0 9 -0.04 0.07
 -7 0 9 0.04 0.2
 -7 0 9 -0.11 0.16
 -6 0 9 -0.05 0.16
 6 0 -9 0.04 0.06
 5 0 -9 0 0.04
 -5 0 9 -0.1 0.15
 -5 0 9 0.07 0.12
 -4 0 9 -0.13 0.1
 -4 0 9 0.05 0.12
 -3 0 9 -0.08 0.1
 -2 0 9 0.09 0.09
 2 0 -9 0.06 0.04
 1 0 -9 -0.02 0.05
 -1 0 9 -0.01 0.09
 0 0 -9 -0.02 0.07
 0 0 9 0.09 0.1
 1 0 9 0.05 0.09
 -1 0 -9 0.14 0.09
 -2 0 -9 0.03 0.09
 2 0 9 -0.06 0.08
 3 0 9 0.13 0.1
 4 0 9 0.15 0.15
 4 0 9 -0.03 0.09
 5 0 9 0.05 0.15
 6 0 9 -0.03 0.2
 7 0 9 -0.05 0.16
 7 0 9 -0.05 0.16
 -7 0 -9 0.02 0.16
 7 0 9 0.03 0.19
 8 0 9 0.18 0.19
 -8 0 -9 -0.13 0.2
 8 0 9 0.06 0.17
 8 0 9 0.1 0.22
 -8 0 -9 -0.05 0.14
 9 0 9 0.08 0.2
 9 0 9 -0.05 0.17
 9 0 9 0.09 0.16
 -9 0 -9 -0.02 0.17
 10 0 9 0.01 0.13
 -10 0 -9 -0.02 0.15
 10 0 9 0.33 0.21
 10 0 9 0.14 0.15
 -11 0 -9 0.04 0.09
 11 0 9 0.02 0.08
 11 0 9 0.04 0.1
 -11 -1 9 2.77 0.3
 -11 -1 9 2.82 0.28
 -11 -1 9 3.08 0.28
 -11 -1 9 2.6 0.24
 -11 1 9 2.89 0.29
 -11 1 9 3.05 0.29
 -11 1 9 2.88 0.27
 -11 1 9 2.5 0.28
 -10 -1 9 0.35 0.12
 -10 -1 9 0.28 0.18
 -10 -1 9 0.45 0.19
 -10 -1 9 0.17 0.17
 -10 1 9 0.33 0.13
 -10 1 9 0.54 0.2
 -10 1 9 0.32 0.18
 -10 1 9 0.27 0.1
 -10 1 9 0.19 0.18
 -9 -1 9 8.97 0.53
 -9 -1 9 8.01 0.52
 -9 -1 9 8.86 0.55
 -9 -1 9 8.87 0.56
 -9 -1 9 8.18 0.3
 -9 1 9 8.33 0.37
 -9 1 9 8.61 0.54
 -9 1 9 8.02 0.53
 -9 1 9 7.76 0.55
 -9 1 9 7.99 0.56
 -8 -1 9 2.2 0.35
 -8 -1 9 2.51 0.38
 -8 -1 9 2.12 0.17
 8 -1 -9 2.28 0.27
 -8 -1 9 2.53 0.36
 -8 1 9 1.83 0.2
 -8 1 9 2.14 0.37
 -8 1 9 2.4 0.37
 -8 1 9 2.64 0.37
 -8 1 9 2.19 0.35
 -8 1 9 2.35 0.32
 7 -1 -9 21.67 0.73
 -7 -1 9 19.81 0.84
 7 -1 -9 20.7 0.78
 -7 -1 9 19.65 0.55
 7 -1 -9 22.28 0.97
 -7 -1 9 20.59 0.83
 -7 -1 9 20.59 0.84
 -7 1 9 18.66 0.87
 -7 1 9 19.23 0.81
 -7 1 9 19.3 0.61
 -7 1 9 19.94 0.82
 7 1 -9 19.91 0.65
 -7 1 9 19.21 0.86
 6 -1 -9 1.28 0.18
 6 -1 -9 1.26 0.15
 6 1 -9 1.1 0.1
 -6 1 9 1.16 0.28
 -6 1 9 1.59 0.28
 5 -1 -9 16.01 0.55
 -5 1 9 15.9 0.73
 -5 1 9 14.88 0.7
 -4 -1 9 4.87 0.34
 4 -1 -9 5.09 0.24
 -4 -1 9 4.71 0.33
 -4 1 9 5 0.36
 -4 1 9 4.87 0.37
 -4 1 9 5 0.35
 3 -1 -9 24.88 0.72
 -3 -1 9 22.87 0.83
 -3 1 9 22.96 0.82
 -3 1 9 25.52 0.84
 -3 1 9 22.48 0.85
 -2 -1 9 24.47 0.84
 2 -1 -9 24.52 0.73
 -2 1 9 25.43 0.89
 -2 1 9 26.89 0.87
 1 -1 -9 126.54 3.24
 -1 -1 9 126.06 3.28
 -1 1 9 134.97 3.31
 -1 1 9 130.78 3.43
 0 -1 9 0.74 0.16
 0 -1 -9 1.05 0.14
 0 1 9 0.85 0.15
 0 1 9 1 0.15
 0 1 -9 1.14 0.14
 1 -1 9 26.67 0.8
 -1 -1 -9 25.96 0.84
 1 -1 9 25.75 0.89
 1 1 9 26.93 0.82
 -1 1 -9 25.81 0.84
 1 1 9 25.22 0.85
 2 -1 9 9.25 0.41
 -2 -1 -9 9.89 0.45
 2 -1 9 9.54 0.48
 2 1 9 9.58 0.44
 -2 1 -9 9.71 0.45
 3 -1 9 0.69 0.18
 3 -1 9 0.45 0.16
 3 -1 9 0.38 0.13
 -3 1 -9 0.36 0.14
 3 1 9 0.43 0.14
 4 -1 9 5.23 0.38
 4 -1 9 5.24 0.39
 -4 1 -9 5.72 0.35
 5 -1 9 16.2 0.73
 5 -1 9 17.15 0.76
 -5 1 -9 16.97 0.67
 6 -1 9 0.65 0.2
 6 -1 9 1.04 0.25
 6 -1 9 0.91 0.25
 6 1 9 1.02 0.29
 -7 -1 -9 41.08 1.21
 7 -1 9 41.13 1.81
 7 -1 9 43.58 1.46
 7 -1 9 40.28 1.45
 7 -1 9 41.99 1.4
 7 1 9 41.06 1.44
 7 1 9 42.59 1.43
 -7 1 -9 41.95 1.11
 -7 1 -9 41.42 1.26
 7 1 9 41.26 1.85
 -8 -1 -9 -0.05 0.19
 8 -1 9 -0.08 0.16
 -8 -1 -9 0.04 0.13
 8 -1 9 -0.22 0.19
 8 -1 9 0.04 0.16
 8 1 9 0 0.16
 -8 1 -9 0.04 0.14
 8 1 9 -0.02 0.18
 8 1 9 0.13 0.23
 9 -1 9 38.25 1.7
 9 -1 9 40.53 1.42
 -9 -1 -9 40.45 1.24
 9 -1 9 39.75 1.31
 9 1 9 40.08 1.72
 9 1 9 39.19 1.32
 -9 1 -9 38.74 1.23
 9 1 9 36.03 1.32
 10 -1 9 0.61 0.18
 10 -1 9 0.96 0.24
 10 -1 9 0.62 0.17
 -10 -1 -9 0.58 0.17
 10 1 9 0.7 0.21
 -10 1 -9 0.79 0.21
 10 1 9 0.53 0.17
 11 -1 9 4.64 0.35
 -11 -1 -9 4.5 0.23
 11 -1 9 4 0.37
 -11 1 -9 4.38 0.25
 11 1 9 4.2 0.24
 11 1 9 4.21 0.32
 -11 -2 9 0.32 0.08
 -11 -2 9 0.51 0.15
 -11 -2 9 0.52 0.14
 -11 2 9 0.28 0.14
 -11 2 9 0.46 0.12
 -11 2 9 0.78 0.16
 -11 2 9 0.63 0.08
 -10 -2 9 16.6 0.67
 -10 -2 9 16.9 0.67
 10 -2 -9 15.56 0.58
 -10 -2 9 15.21 0.66
 -10 -2 9 16.05 0.73
 -10 2 9 16.08 0.83
 -10 2 9 16.94 0.71
 -10 2 9 18.52 0.71
 -10 2 9 17 0.55
 -10 2 9 15.57 0.66
 9 -2 -9 1.18 0.3
 -9 -2 9 2.16 0.32
 -9 -2 9 1.17 0.22
 -9 -2 9 0.93 0.23
 -9 -2 9 1.52 0.28
 -9 -2 9 1.07 0.1
 -9 2 9 0.9 0.26
 -9 2 9 1.34 0.2
 -9 2 9 0.98 0.27
 -9 2 9 0.95 0.24
 -9 2 9 1.3 0.29
 8 -2 -9 19.38 0.97
 -8 -2 9 18.94 0.81
 -8 -2 9 20 0.81
 -8 -2 9 18.76 0.52
 -8 -2 9 18.74 0.81
 -8 2 9 19.59 0.9
 -8 2 9 18.02 0.82
 -8 2 9 18.9 0.81
 -8 2 9 18.51 0.65
 -8 2 9 19.33 0.82
 -8 2 9 17.24 0.93
 -7 -2 9 0.37 0.22
 7 -2 -9 0.3 0.2
 -7 -2 9 0.39 0.09
 7 -2 -9 0.31 0.17
 7 -2 -9 0.45 0.16
 -7 2 9 0.33 0.13
 -7 2 9 0.22 0.18
 -7 2 9 0.15 0.13
 -7 2 9 0.56 0.23
 -7 2 9 0.16 0.2
 -7 2 9 0.52 0.08
 6 -2 -9 5.93 0.41
 6 -2 -9 6.04 0.47
 6 -2 -9 5.95 0.38
 6 -2 -9 5.42 0.33
 -6 2 9 6.04 0.48
 5 -2 -9 43.49 1.25
 5 -2 -9 42.26 1.3
 -5 2 9 43.92 1.35
 -5 2 9 45.14 1.52
 -5 2 9 44.02 1.42
 4 -2 -9 8.78 0.37
 4 -2 -9 8.58 0.4
 -4 2 9 8.38 0.45
 -4 2 9 8.57 0.51
 -4 2 9 8.66 0.48
 -4 2 9 8.66 0.5
 -3 -2 9 1.14 0.19
 3 -2 -9 1.24 0.16
 -3 2 9 1.07 0.21
 -3 2 9 1.16 0.18
 -3 2 9 1.75 0.22
 -3 2 9 0.9 0.2
 -2 -2 9 3.95 0.3
 2 -2 -9 4.04 0.26
 -2 2 9 3.66 0.31
 -2 2 9 3.88 0.29
 -2 2 9 3.78 0.3
 1 -2 -9 21.25 0.71
 -1 -2 9 20.32 0.75
 -1 2 9 22.36 0.75
 -1 2 9 19.3 0.74
 0 -2 9 12.38 0.56
 0 -2 9 13.76 0.53
 0 -2 -9 13.13 0.52
 0 2 9 13.24 0.54
 0 2 9 13.18 0.54
 1 -2 9 0.2 0.13
 -1 -2 -9 0.35 0.12
 1 -2 9 0.06 0.09
 1 2 9 0.16 0.09
 1 2 9 0.03 0.09
 -1 2 -9 0.26 0.11
 2 -2 9 31.63 0.92
 -2 -2 -9 30.74 1.08
 2 -2 9 31.79 1.03
 2 -2 9 30.46 1.06
 2 -2 9 30.33 0.93
 -2 2 -9 32.63 1.08
 2 2 9 32.15 0.98
 3 -2 9 5.03 0.32
 3 -2 9 4.55 0.36
 3 -2 9 5.57 0.38
 3 -2 9 4.77 0.31
 -3 2 -9 5.24 0.34
 4 -2 9 85.2 2.43
 4 -2 9 83.07 2.05
 4 -2 9 82.1 2.3
 -4 2 -9 89.19 2.33
 5 -2 9 2.99 0.34
 5 -2 9 3.06 0.33
 -5 2 -9 2.65 0.29
 -6 -2 -9 65.6 1.73
 6 -2 9 63.88 2.5
 6 -2 9 65.67 2.07
 6 -2 9 64.4 1.97
 6 -2 9 64.61 1.98
 6 2 9 64.42 2.56
 -6 2 -9 64.18 1.85
 -7 -2 -9 11.64 0.52
 7 -2 9 11.47 0.79
 7 -2 9 11.56 0.71
 7 -2 9 11.65 0.61
 7 -2 9 11.89 0.71
 7 -2 9 11.28 0.69
 -7 2 -9 11.99 0.61
 7 2 9 11.57 0.85
 -7 2 -9 11.14 0.49
 7 2 9 12.94 0.68
 8 -2 9 53.58 1.67
 8 -2 9 54.81 1.78
 8 -2 9 56.28 1.79
 8 -2 9 51.71 2.16
 -8 -2 -9 57.33 1.6
 8 2 9 56.61 1.79
 -8 2 -9 56.64 1.51
 8 2 9 55.26 2.32
 9 -2 9 2.02 0.35
 9 -2 9 2.04 0.3
 -9 -2 -9 2.08 0.31
 9 -2 9 1.99 0.38
 9 2 9 1.8 0.4
 -9 2 -9 2.11 0.33
 -9 2 -9 1.79 0.14
 9 2 9 1.91 0.33
 10 -2 9 9.41 0.41
 -10 -2 -9 10.06 0.44
 10 -2 9 9.09 0.52
 10 -2 9 9.14 0.53
 10 -2 9 9.01 0.56
 10 2 9 9.33 0.64
 10 2 9 10.54 0.51
 -10 2 -9 10.7 0.51
 10 -3 -9 -0.07 0.14
 10 -3 -9 -0.17 0.11
 -10 -3 9 -0.27 0.13
 -10 -3 9 -0.01 0.15
 -10 -3 9 0.08 0.08
 -10 3 9 0.15 0.09
 -10 3 9 0 0.14
 -10 3 9 0.01 0.14
 -10 3 9 0 0.09
 -9 -3 9 14.07 0.69
 9 -3 -9 14.23 0.53
 -9 -3 9 13.51 0.62
 9 -3 -9 14.22 0.66
 9 -3 -9 12.97 0.75
 -9 -3 9 14.83 0.67
 -9 3 9 13.42 0.79
 -9 3 9 14.14 0.65
 -9 3 9 15.27 0.69
 -9 3 9 13.59 0.66
 -9 3 9 13.85 0.53
 -8 -3 9 0.15 0.18
 -8 -3 9 0.04 0.07
 8 -3 -9 0.12 0.23
 -8 -3 9 -0.24 0.17
 -8 -3 9 0 0.09
 8 -3 -9 0.14 0.14
 -8 3 9 -0.1 0.18
 -8 3 9 0.16 0.19
 -8 3 9 -0.03 0.11
 -8 3 9 -0.16 0.16
 -8 3 9 -0.08 0.1
 -8 3 9 -0.11 0.18
 -7 -3 9 17.34 0.51
 7 -3 -9 17.25 0.78
 7 -3 -9 18.84 0.78
 7 -3 -9 16.14 0.72
 -7 -3 9 17.28 0.76
 7 -3 -9 18.26 0.93
 -7 3 9 17.67 0.77
 -7 3 9 15.95 0.52
 -7 3 9 15.17 0.78
 -7 3 9 15.92 0.76
 -7 3 9 16.76 0.63
 -7 3 9 15.69 0.89
 -7 3 9 16.96 0.62
 6 -3 -9 5.16 0.37
 6 -3 -9 4.74 0.39
 -6 -3 9 5.39 0.44
 6 -3 -9 6.03 0.45
 -6 -3 9 5.01 0.25
 6 -3 -9 5.94 0.51
 6 -3 -9 5.64 0.41
 -6 3 9 5.14 0.46
 -6 3 9 4.73 0.34
 -6 3 9 5.44 0.32
 -6 3 9 5.84 0.45
 -6 3 9 5.61 0.38
 -6 3 9 5.14 0.42
 -6 3 9 4.58 0.46
 -6 3 9 4.69 0.44
 5 -3 -9 9.71 0.52
 5 -3 -9 10.23 0.52
 5 -3 -9 9.11 0.46
 5 -3 -9 10.29 0.6
 -5 3 9 10.25 0.59
 -5 3 9 10.76 0.61
 -5 3 9 9.98 0.55
 4 -3 -9 11.57 0.54
 4 -3 -9 10.59 0.53
 4 -3 -9 11.6 0.5
 -4 3 9 11.78 0.57
 -4 3 9 11.39 0.6
 -4 3 9 11.48 0.63
 3 -3 -9 8.72 0.45
 3 -3 -9 8.73 0.42
 -3 3 9 8.48 0.49
 -3 3 9 8.39 0.5
 -3 3 9 8.02 0.49
 -3 3 9 8.35 0.44
 2 -3 -9 1.49 0.19
 -2 -3 9 1.7 0.23
 -2 -3 9 1.32 0.2
 2 -3 -9 1.28 0.2
 -2 3 9 1.72 0.24
 -2 3 9 1.82 0.25
 -2 3 9 1.78 0.21
 -2 3 9 2.1 0.25
 1 -3 -9 75.81 2.11
 -1 -3 9 75.15 2.09
 -1 -3 9 70.35 1.9
 1 -3 -9 77.77 2.04
 -1 -3 9 72.15 1.85
 -1 3 9 74.27 2.01
 -1 3 9 73.83 2.11
 -1 3 9 77.19 2.08
 0 -3 9 3.49 0.31
 0 -3 9 3.53 0.28
 0 -3 9 2.75 0.28
 0 -3 -9 3.11 0.28
 0 -3 9 3.8 0.28
 0 -3 -9 3.51 0.27
 0 3 9 3.14 0.28
 0 3 9 3.68 0.29
 1 -3 9 66.76 1.96
 1 -3 9 63.88 1.84
 -1 -3 -9 70.34 1.88
 -1 -3 -9 66.49 1.97
 1 -3 9 65.36 1.7
 1 -3 9 65.75 1.75
 -1 3 -9 71.68 2.03
 1 3 9 68.01 1.91
 2 -3 9 15.48 0.69
 2 -3 9 16.36 0.63
 2 -3 9 16.22 0.64
 2 -3 9 16.45 0.72
 2 3 9 16.41 0.64
 -2 3 -9 16.52 0.71
 -2 3 -9 17.09 0.68
 3 -3 9 14.13 0.6
 3 -3 9 13.95 0.67
 3 -3 9 15.99 0.73
 3 -3 9 15.81 0.64
 -3 3 -9 17.41 0.72
 4 -3 9 0.87 0.22
 4 -3 9 1.21 0.21
 4 -3 9 0.93 0.23
 4 -3 9 0.9 0.18
 4 -3 9 1.77 0.29
 -4 3 -9 0.79 0.2
 5 -3 9 50.53 1.42
 5 -3 9 49.87 1.69
 5 -3 9 46.14 1.55
 5 -3 9 48.03 1.45
 5 -3 9 47.85 1.57
 5 -3 9 50.91 1.62
 -5 3 -9 54.5 1.66
 6 -3 9 14.02 0.75
 6 -3 9 14.38 0.64
 6 -3 9 13.83 0.76
 6 -3 9 13.53 0.82
 6 -3 9 13.08 0.67
 6 -3 9 15.01 0.8
 -6 -3 -9 13.99 0.66
 -6 3 -9 14.76 0.64
 -6 3 -9 13.77 0.7
 6 3 9 14.32 0.73
 6 3 9 14.7 0.95
 -6 3 -9 14.76 0.74
 -7 -3 -9 28.86 1.03
 7 -3 9 27.19 1.01
 7 -3 9 30.94 1.19
 7 -3 9 29.52 1.16
 7 -3 9 26.41 0.99
 -7 -3 -9 29.13 1
 7 -3 9 27.61 1.3
 7 -3 9 28.76 1.21
 7 3 9 29.36 1.45
 7 3 9 29.12 1.12
 -7 3 -9 28.17 1
 -7 3 -9 27.64 0.85
 8 -3 9 14.55 0.78
 8 -3 9 14.25 0.63
 8 -3 9 14.57 0.78
 8 -3 9 12.48 0.78
 -8 -3 -9 14.79 0.65
 8 -3 9 14.85 0.82
 -8 -3 -9 13.18 0.66
 8 -3 9 13.24 0.71
 8 3 9 13.95 0.71
 8 3 9 15.02 0.94
 -8 3 -9 15.19 0.62
 -9 -3 -9 13.47 0.59
 9 -3 9 12.87 0.69
 9 -3 9 13.14 0.7
 9 -3 9 12.88 0.53
 9 -3 9 13.88 0.73
 -9 -3 -9 14.36 0.6
 9 -3 9 13.85 0.65
 -9 3 -9 14.47 0.69
 9 3 9 13.43 0.65
 9 3 9 14.17 0.86
 10 -3 9 0.59 0.2
 10 -3 9 0.11 0.17
 -10 -3 -9 0.56 0.13
 10 3 9 0.73 0.18
 10 3 9 0.44 0.14
 -10 3 -9 0.52 0.16
 -10 -4 9 0.09 0.07
 10 -4 -9 0.16 0.14
 10 -4 -9 0.09 0.12
 -10 -4 9 0.03 0.11
 -10 4 9 0.17 0.09
 -10 4 9 0.09 0.1
 -10 4 9 0.08 0.13
 -10 4 9 0.21 0.14
 -9 -4 9 0.34 0.18
 -9 -4 9 0.25 0.11
 9 -4 -9 0.28 0.16
 9 -4 -9 0.27 0.13
 9 -4 -9 0.41 0.21
 -9 4 9 0.15 0.16
 -9 4 9 0.26 0.14
 -9 4 9 0.42 0.14
 -9 4 9 0.33 0.18
 -9 4 9 0.22 0.18
 -8 -4 9 2.31 0.35
 8 -4 -9 1.47 0.3
 8 -4 -9 1.87 0.29
 -8 -4 9 1.96 0.28
 8 -4 -9 1.97 0.33
 -8 -4 9 2.15 0.16
 8 -4 -9 1.47 0.32
 8 -4 -9 2.46 0.24
 -8 4 9 2.07 0.38
 -8 4 9 2.08 0.3
 -8 4 9 1.91 0.16
 -8 4 9 1.73 0.31
 -8 4 9 2.01 0.32
 -8 4 9 1.77 0.26
 -7 -4 9 2.3 0.35
 7 -4 -9 2.31 0.38
 7 -4 -9 2.5 0.42
 7 -4 -9 2.32 0.26
 7 -4 -9 1.9 0.32
 -7 -4 9 2.39 0.31
 7 -4 -9 2.31 0.34
 -7 -4 9 1.84 0.18
 7 -4 -9 2.64 0.35
 -7 4 9 1.92 0.39
 -7 4 9 1.86 0.31
 -7 4 9 2.35 0.24
 -7 4 9 2.02 0.27
 -7 4 9 2.19 0.36
 -7 4 9 2.12 0.28
 -7 4 9 2.47 0.34
 -6 -4 9 21.47 0.85
 6 -4 -9 21.16 0.86
 -6 -4 9 25.55 2.14
 -6 -4 9 19.47 0.92
 6 -4 -9 21.56 0.86
 -6 -4 9 19.29 0.62
 6 -4 -9 20.99 0.7
 6 -4 -9 20.6 0.99
 6 -4 -9 19.96 0.85
 6 -4 -9 23.01 0.9
 -6 4 9 20.58 0.87
 -6 4 9 20.55 0.88
 -6 4 9 19.99 0.78
 -6 4 9 20.99 1.08
 -6 4 9 20.97 0.86
 -6 4 9 19.97 0.7
 -6 4 9 20.48 0.76
 -6 4 9 18.86 0.88
 5 -4 -9 42.37 1.33
 5 -4 -9 41.36 1.33
 5 -4 -9 39.74 1.07
 5 -4 -9 41.81 1.5
 -5 -4 9 40.13 1.58
 5 -4 -9 41.61 1.29
 -5 -4 9 37.7 1.23
 -5 -4 9 39.94 1.05
 5 -4 -9 39.35 1.41
 5 -4 -9 40.36 1.33
 -5 4 9 41.6 1.31
 -5 4 9 41.42 1.28
 -5 4 9 41.05 1.22
 -5 4 9 40.21 1.39
 -5 4 9 40.21 1.71
 -5 4 9 42.35 1.33
 -5 4 9 41.3 1.17
 -5 4 9 41.59 1.37
 4 -4 -9 13.22 0.69
 4 -4 -9 12.97 0.6
 4 -4 -9 11.26 0.62
 4 -4 -9 12.52 0.47
 4 -4 -9 12.3 0.61
 -4 4 9 12.06 0.67
 -4 4 9 13.14 0.63
 -4 4 9 12.9 0.68
 3 -4 -9 3.9 0.25
 3 -4 -9 4.34 0.32
 3 -4 -9 3.96 0.33
 3 -4 -9 3.9 0.34
 3 -4 -9 3.98 0.33
 -3 4 9 3.55 0.36
 -3 4 9 4.32 0.34
 -3 4 9 4.1 0.39
 2 -4 -9 56.62 1.64
 2 -4 -9 51.75 1.7
 2 -4 -9 55.96 1.55
 -2 -4 9 57.91 1.52
 -2 4 9 61.39 1.65
 -2 4 9 56.57 1.77
 -2 4 9 57.07 1.8
 1 -4 -9 0.76 0.18
 -1 -4 9 0.55 0.17
 1 -4 -9 0.67 0.18
 -1 -4 9 0.52 0.18
 1 -4 -9 1.04 0.21
 -1 4 9 0.54 0.16
 -1 4 9 0.94 0.22
 1 4 -9 0.81 0.18
 -1 4 9 0.58 0.18
 -1 4 9 0.68 0.19
 0 -4 -9 49.39 1.37
 0 -4 -9 48.92 1.19
 0 -4 9 50.01 1.44
 0 -4 9 47.24 1.38
 0 -4 -9 49.29 1.58
 0 -4 9 53.09 1.59
 0 4 9 51.16 1.58
 0 4 -9 52.65 1.5
 1 -4 9 4.96 0.37
 1 -4 9 5.06 0.44
 -1 -4 -9 4.98 0.27
 1 -4 9 5.82 0.42
 1 -4 9 5.2 0.36
 1 -4 9 4.91 0.38
 1 4 9 5.74 0.4
 -1 4 -9 6.08 0.4
 2 -4 9 0.65 0.18
 2 -4 9 0.53 0.21
 2 -4 9 0.68 0.2
 2 -4 9 0.61 0.19
 2 -4 9 0.64 0.2
 -2 4 -9 0.58 0.19
 -2 4 -9 0.79 0.22
 3 -4 9 5.45 0.4
 3 -4 9 5.53 0.47
 3 -4 9 5.97 0.46
 3 -4 9 5.15 0.43
 3 -4 9 5.17 0.39
 -3 4 -9 5.7 0.45
 -3 4 -9 5.35 0.4
 4 -4 9 4.32 0.43
 4 -4 9 4.28 0.42
 4 -4 9 4.12 0.43
 4 -4 9 4.33 0.39
 4 -4 9 5.02 0.39
 -4 4 -9 4.41 0.39
 -4 4 -9 3.46 0.6
 5 -4 9 0.54 0.2
 5 -4 9 0.87 0.26
 5 -4 9 0.36 0.25
 5 -4 9 0.41 0.23
 5 -4 9 0.46 0.23
 -5 -4 -9 0.95 0.23
 -5 -4 -9 0.38 0.24
 5 -4 9 0.61 0.24
 5 -4 9 0.6 0.2
 -5 4 -9 0.89 0.23
 5 4 9 0.53 0.25
 -5 4 -9 0.55 0.27
 5 4 9 0.51 0.22
 -5 4 -9 -0.49 0.35
 6 -4 9 37.44 1.36
 6 -4 9 37.32 1.22
 -6 -4 -9 35.85 1.18
 6 -4 9 39.75 1.38
 6 -4 9 35.71 1.16
 6 -4 9 39.29 1.51
 6 -4 9 37.65 1.46
 -6 -4 -9 37.85 3.01
 6 -4 9 35.55 1.37
 6 4 9 38.23 1.73
 -6 4 -9 39.8 1.16
 6 4 9 37.21 1.32
 -6 4 -9 38.56 1.29
 -6 4 -9 36.52 1.33
 7 -4 9 0.27 0.21
 -7 -4 -9 -0.04 0.15
 7 -4 9 0.01 0.2
 7 -4 9 0.46 0.21
 -7 -4 -9 0.07 0.15
 7 -4 9 -0.01 0.15
 7 -4 9 0.06 0.21
 -7 -4 -9 0.1 0.18
 -7 4 -9 0.09 0.19
 -7 4 -9 0.19 0.14
 7 4 9 -0.13 0.16
 -7 4 -9 0.04 0.18
 7 4 9 0.1 0.2
 8 -4 9 15.06 0.77
 8 -4 9 15.8 0.68
 8 -4 9 13.95 0.76
 -8 -4 -9 15.18 0.67
 -8 -4 -9 14.83 0.65
 8 4 9 15.69 0.72
 -8 4 -9 15.85 0.61
 8 4 9 15.02 0.91
 -9 -4 -9 1.98 0.26
 9 -4 9 1.6 0.28
 -9 -4 -9 1.22 0.21
 9 -4 9 1.09 0.22
 9 4 9 1.52 0.27
 -9 4 -9 1.68 0.29
 9 4 9 1.32 0.32
 10 -4 9 5.06 0.3
 -10 -4 -9 5.58 0.23
 10 -4 9 4.58 0.35
 10 4 9 5.04 0.25
 10 4 9 5.05 0.34
 -10 4 -9 5.13 0.32
 9 -5 -9 2.13 0.37
 9 -5 -9 2.39 0.26
 -9 -5 9 2.21 0.25
 -9 -5 9 2.44 0.27
 -9 5 9 1.62 0.23
 -9 5 9 2.26 0.21
 -9 5 9 2.17 0.32
 -9 5 9 2.2 0.26
 -8 -5 9 1.32 0.24
 8 -5 -9 1 0.27
 8 -5 -9 0.89 0.26
 -8 -5 9 1.04 0.23
 8 -5 -9 1.14 0.21
 8 -5 -9 1.23 0.29
 8 -5 -9 0.98 0.24
 8 -5 -9 1.17 0.19
 -8 5 9 0.76 0.21
 -8 5 9 0.95 0.23
 -8 5 9 1.06 0.23
 -8 5 9 1 0.2
 -8 5 9 1.13 0.15
 7 -5 -9 4.6 0.6
 -7 -5 9 3.35 0.99
 -7 -5 9 4.31 0.4
 7 -5 -9 4.85 0.49
 -7 -5 9 4.86 0.42
 7 -5 -9 4.22 0.37
 7 -5 -9 3.58 0.45
 7 -5 -9 5.28 0.44
 7 -5 -9 4.71 0.44
 7 -5 -9 4.27 0.3
 -7 -5 9 4.03 0.25
 -7 5 9 4.28 0.6
 -7 5 9 5.02 0.43
 -7 5 9 4.25 0.41
 -7 5 9 4.56 0.38
 -7 5 9 5.07 0.38
 -7 5 9 4.52 0.31
 -6 -5 9 0.02 0.09
 6 -5 -9 0.03 0.16
 -6 -5 9 0.07 0.1
 -6 -5 9 0 0.17
 6 -5 -9 -0.04 0.15
 -6 -5 9 -0.23 0.19
 6 -5 -9 0.01 0.17
 6 -5 -9 0.16 0.13
 6 -5 -9 -0.02 0.16
 6 -5 -9 0.12 0.21
 -6 5 9 -0.16 0.13
 -6 5 9 -0.1 0.15
 -6 5 9 0.17 0.15
 -6 5 9 0.03 0.18
 -6 5 9 0.12 0.19
 -6 5 9 0.37 0.21
 -6 5 9 0.24 0.18
 -6 5 9 -0.18 0.15
 -5 -5 9 2.22 0.23
 5 -5 -9 2.36 0.31
 5 -5 -9 2.59 0.33
 5 -5 -9 2.54 0.25
 5 -5 -9 2.81 0.38
 5 -5 -9 2.06 0.34
 5 -5 -9 2.23 0.33
 -5 -5 9 2.63 0.36
 -5 -5 9 2.34 0.33
 -5 5 9 2.83 0.32
 -5 5 9 2.64 0.34
 -5 5 9 2.19 0.33
 -5 5 9 2.77 0.35
 -5 5 9 2.88 0.39
 -5 5 9 2.57 0.35
 -5 5 9 2.57 0.35
 4 -5 -9 -0.12 0.16
 4 -5 -9 0.11 0.16
 4 -5 -9 0.03 0.14
 -4 -5 9 0.2 0.12
 4 -5 -9 0.05 0.18
 -4 -5 9 0.3 0.19
 4 -5 -9 0.1 0.13
 -4 -5 9 0.1 0.12
 -4 -5 9 0.16 0.09
 4 -5 -9 0.29 0.17
 -4 5 9 0.19 0.18
 -4 5 9 0.09 0.2
 -4 5 9 0.13 0.11
 -4 5 9 0.19 0.17
 -4 5 9 0.15 0.22
 -4 5 9 0.18 0.21
 -4 5 9 0.32 0.19
 -4 5 9 0.21 0.15
 -3 5 9 0.2 0.19
 -3 5 9 0.21 0.24
 -3 5 9 0.22 0.2
 -3 5 9 0.1 0.13
 -3 5 9 0.4 0.25
 -3 5 9 0.13 0.19
 -3 5 9 0.2 0.18
 3 5 -9 0.43 0.2
 -3 5 9 0.16 0.15
 2 -5 -9 4.11 0.4
 2 -5 -9 4.38 0.28
 2 -5 -9 4.78 0.39
 2 -5 -9 4.24 0.36
 2 -5 -9 4.77 0.36
 2 5 -9 4.87 0.43
 -2 5 9 4.84 0.43
 -2 5 9 4.69 0.36
 1 -5 -9 17.68 0.72
 1 -5 -9 16.97 0.56
 1 -5 -9 16.74 0.69
 -1 -5 9 17.36 0.82
 -1 -5 9 18.17 0.76
 -1 -5 9 16.83 0.72
 1 -5 -9 17.06 0.71
 -1 5 9 16.92 0.81
 1 5 -9 18.47 0.85
 0 -5 9 7.67 0.55
 0 -5 -9 8.05 0.35
 0 -5 9 7.61 0.48
 0 -5 9 8.21 0.49
 0 -5 -9 8.03 0.47
 0 -5 -9 8.25 0.44
 0 5 9 8.03 0.52
 0 5 -9 7.93 0.47
 0 5 -9 8.16 0.54
 1 -5 9 4.42 0.45
 1 -5 9 4.74 0.44
 1 -5 9 4.43 0.38
 1 -5 9 4.23 0.37
 -1 5 -9 4.12 0.42
 1 5 9 4.82 0.4
 -1 5 -9 5.46 0.41
 2 -5 9 0.18 0.18
 2 -5 9 0.28 0.2
 2 -5 9 0.32 0.18
 2 -5 9 0.34 0.19
 2 -5 9 0.37 0.18
 2 -5 9 0.25 0.19
 -2 5 -9 0.24 0.18
 2 5 9 0.23 0.19
 -2 5 -9 0.18 0.16
 3 -5 9 0.85 0.26
 -3 5 -9 0.78 0.22
 -3 5 -9 0.59 0.24
 -3 5 -9 0.4 0.21
 3 5 9 0.43 0.21
 -3 5 -9 0.44 0.21
 3 5 9 0.4 0.22
 3 5 9 0.57 0.18
 4 -5 9 0.03 0.18
 -4 -5 -9 -0.09 0.16
 4 -5 9 0.01 0.18
 4 -5 9 0.22 0.2
 4 -5 9 0.3 0.2
 -4 -5 -9 0 0.16
 4 -5 9 0.28 0.21
 4 -5 9 0.09 0.16
 4 -5 9 0.21 0.23
 -4 5 -9 0.26 0.19
 -4 5 -9 0.09 0.23
 4 5 9 0.09 0.17
 -4 5 -9 0.32 0.28
 4 5 9 0.12 0.16
 -4 5 -9 0.15 0.23
 5 -5 9 6.55 0.43
 5 -5 9 7.22 0.55
 -5 -5 -9 6.25 0.47
 -5 -5 -9 6.77 1.26
 5 -5 9 6.46 0.52
 5 -5 9 6.64 0.55
 5 -5 9 7.46 0.6
 5 -5 9 6.58 0.51
 5 -5 9 7.84 0.55
 5 5 9 7.88 0.64
 -5 5 -9 7.33 0.51
 5 5 9 6.66 0.49
 -5 5 -9 7.21 0.53
 -5 5 -9 7.18 0.53
 6 -5 9 -0.36 0.2
 -6 -5 -9 -0.29 0.2
 6 -5 9 0.08 0.2
 6 -5 9 0.01 0.19
 6 -5 9 -0.05 0.15
 6 -5 9 0.19 0.19
 -6 -5 -9 0.03 0.16
 6 -5 9 -0.17 0.2
 -6 -5 -9 -0.01 0.14
 6 -5 9 0.02 0.2
 -6 5 -9 -0.09 0.21
 -6 5 -9 0.08 0.2
 6 5 9 -0.01 0.17
 -6 5 -9 -0.16 0.14
 6 5 9 0.21 0.16
 -6 5 -9 -0.2 0.19
 7 -5 9 5.71 0.39
 7 -5 9 5.15 0.5
 -7 -5 -9 4.5 0.39
 -7 -5 -9 5.45 1.04
 -7 -5 -9 4.94 0.43
 7 5 9 5.24 0.42
 -7 5 -9 5.55 0.28
 7 5 9 5.08 0.53
 -7 5 -9 4.45 0.38
 8 -5 9 4.46 0.35
 -8 -5 -9 4.58 0.85
 8 -5 9 4.47 0.43
 8 -5 9 4.3 0.47
 -8 -5 -9 5.27 0.38
 -8 -5 -9 5.11 0.37
 8 5 9 4.48 0.35
 -8 5 -9 4.72 0.3
 8 5 9 4.76 0.45
 9 -5 9 10.55 0.53
 9 -5 9 10.67 0.42
 -9 -5 -9 10.8 0.41
 9 -5 9 10.05 0.51
 9 5 9 10.77 0.46
 9 5 9 11.01 0.42
 9 5 9 10.87 0.55
 8 -6 -9 1.45 0.22
 8 -6 -9 0.76 0.21
 -8 -6 9 1.14 0.2
 8 -6 -9 1.53 0.3
 -8 -6 9 1.41 0.23
 -8 6 9 1.59 0.12
 -8 6 9 1.52 0.23
 -8 6 9 1.01 0.19
 -8 6 9 1.36 0.2
 7 -6 -9 8.84 0.65
 -7 -6 9 7.16 1.13
 7 -6 -9 8.39 0.46
 7 -6 -9 8.78 0.38
 7 -6 -9 8.22 0.56
 -7 -6 9 8.56 0.55
 7 -6 -9 8.13 0.52
 7 -6 -9 8.08 0.55
 -7 -6 9 8.34 0.48
 -7 6 9 9.24 0.51
 -7 6 9 9.45 0.48
 -7 6 9 9.14 0.5
 -7 6 9 8.77 0.51
 -7 6 9 8.58 0.4
 6 -6 -9 14.52 0.69
 6 -6 -9 14.19 0.76
 6 -6 -9 13.69 0.86
 6 -6 -9 13.54 0.51
 6 -6 -9 14.21 0.76
 -6 -6 9 13.74 0.65
 6 -6 -9 13.4 0.62
 -6 -6 9 13.14 1.64
 6 -6 -9 12.92 0.67
 -6 -6 9 13.92 0.78
 -6 6 9 13.91 0.67
 -6 6 9 14.18 0.68
 -6 6 9 14.49 0.67
 -6 6 9 14.83 0.6
 -6 6 9 13.71 0.67
 5 -6 -9 20.16 1.11
 5 -6 -9 18.71 0.81
 5 -6 -9 18.4 0.83
 -5 -6 9 21.3 0.82
 -5 -6 9 19.3 0.99
 5 -6 -9 20.1 0.65
 5 -6 -9 17.68 0.88
 5 -6 -9 19.38 0.77
 5 -6 -9 19.85 0.92
 -5 -6 9 19.38 2.06
 5 -6 -9 16.62 0.91
 -5 6 9 20.35 0.87
 -5 6 9 20.74 0.9
 -5 6 9 20.01 0.84
 -5 6 9 20.02 0.79
 -5 6 9 20.5 0.85
 4 -6 -9 2.5 0.34
 4 -6 -9 2.54 0.37
 4 -6 -9 1.51 0.23
 4 -6 -9 1.35 0.32
 4 -6 -9 2.33 0.29
 4 -6 -9 1.77 0.36
 -4 -6 9 1.99 0.17
 -4 -6 9 1.63 0.29
 -4 -6 9 1.66 0.34
 4 -6 -9 1.84 0.37
 -4 6 9 1.81 0.3
 -4 6 9 1.98 0.32
 -4 6 9 1.93 0.21
 -4 6 9 2.34 0.36
 -4 6 9 2.15 0.36
 -4 6 9 1.65 0.3
 -3 -6 9 2.2 0.25
 -3 -6 9 2.65 0.39
 3 -6 -9 2.25 0.3
 -3 -6 9 2.43 0.34
 3 -6 -9 3.25 0.27
 3 -6 -9 2.55 0.33
 3 -6 -9 2.86 0.37
 3 -6 -9 2.82 0.53
 3 -6 -9 2.93 0.35
 -3 6 9 2.44 0.29
 -3 6 9 2.52 0.38
 -3 6 9 2.88 0.46
 -3 6 9 2.67 0.33
 -3 6 9 2.93 0.4
 -3 6 9 2.26 0.35
 -2 6 9 0.06 0.19
 -2 6 9 -0.1 0.11
 -2 6 9 0.17 0.17
 -2 6 9 0.12 0.19
 -2 6 9 0.15 0.27
 -1 6 9 0.15 0.18
 -1 6 9 0.29 0.16
 -1 6 9 0.02 0.19
 1 6 -9 0 0.2
 -1 6 9 0.23 0.19
 1 6 -9 0 0.16
 -1 6 9 0.22 0.19
 0 6 9 5.24 0.39
 0 6 9 5.8 0.47
 0 6 9 4.58 0.47
 0 6 9 5.07 0.44
 0 6 9 5.57 0.47
 0 6 -9 4.7 0.46
 0 6 -9 5.86 0.46
 1 -6 9 8.36 0.59
 1 -6 9 8.86 0.55
 1 -6 9 8.33 0.56
 1 -6 9 8.6 0.41
 1 -6 9 7.56 0.51
 1 -6 9 8.73 0.5
 1 -6 9 8.15 0.52
 -1 6 -9 9.16 0.6
 1 6 9 9.18 0.53
 1 6 9 7.88 0.55
 1 6 9 7.71 0.58
 -1 6 -9 8.49 0.54
 -1 6 -9 9.62 0.58
 -1 6 -9 9.22 0.76
 1 6 9 8.11 0.57
 2 6 9 -0.05 0.13
 2 6 9 0.17 0.21
 2 6 9 0.22 0.19
 -2 6 -9 0.21 0.21
 -2 6 -9 -0.15 0.19
 -2 6 -9 0.08 0.16
 2 6 9 -0.06 0.2
 -2 6 -9 0.13 0.19
 2 6 9 0.07 0.15
 3 -6 9 7.4 0.53
 3 -6 9 8.36 0.55
 3 -6 9 7.74 0.53
 -3 -6 -9 6.86 1.33
 3 -6 9 6.4 0.55
 3 -6 9 7.71 0.34
 3 -6 9 7.35 0.47
 3 -6 9 8.58 0.63
 3 -6 9 7.95 0.61
 -3 6 -9 7.15 0.64
 3 6 9 7.25 0.51
 3 6 9 7.76 0.58
 3 6 9 7 0.54
 -3 6 -9 7.18 0.52
 3 6 9 8.12 0.54
 -3 6 -9 7.46 0.5
 3 6 9 7.71 0.46
 -3 6 -9 7.7 0.55
 4 -6 9 2.04 0.37
 4 -6 9 1.91 0.32
 -4 -6 -9 1.7 0.2
 4 -6 9 2.23 0.36
 4 -6 9 1.75 0.23
 4 -6 9 1.65 0.32
 4 -6 9 1.74 0.29
 4 -6 9 1.84 0.39
 4 -6 9 1.93 0.35
 4 6 9 1.63 0.3
 4 6 9 1.99 0.38
 -4 6 -9 2.02 0.34
 -4 6 -9 3.92 0.65
 -4 6 -9 3.47 0.5
 4 6 9 1.23 0.31
 -4 6 -9 1.89 0.32
 -4 6 -9 1.85 0.35
 4 6 9 1.87 0.31
 5 -6 9 1.79 0.25
 5 -6 9 1.57 0.34
 5 -6 9 1.22 0.31
 5 -6 9 1.47 0.3
 5 -6 9 1.35 0.27
 5 -6 9 1.36 0.33
 5 -6 9 1.48 0.29
 5 6 9 1.21 0.27
 5 6 9 1.37 0.23
 5 6 9 1.52 0.28
 -5 6 -9 1.8 0.31
 -5 6 -9 1.64 0.38
 -5 6 -9 1.95 0.31
 6 -6 9 3.22 0.46
 6 -6 9 4.01 0.39
 6 -6 9 3.01 0.43
 6 -6 9 4.25 0.4
 6 -6 9 3.07 0.42
 -6 -6 -9 3.43 0.4
 -6 -6 -9 2.56 0.81
 6 -6 9 3.58 0.3
 -6 6 -9 3.53 0.3
 -6 6 -9 4.24 0.4
 -6 6 -9 3.84 0.41
 6 6 9 3.7 0.33
 6 6 9 4.11 0.39
 6 6 9 3.26 0.42
 -7 -6 -9 -0.02 0.12
 7 -6 9 0.2 0.19
 7 -6 9 0.09 0.13
 -7 -6 -9 -0.08 0.16
 7 -6 9 0.31 0.21
 7 6 9 0.15 0.13
 7 6 9 0.18 0.16
 7 6 9 0.17 0.15
 -7 6 -9 0.22 0.15
 -8 -6 -9 2.45 0.62
 -8 -6 -9 2.98 0.25
 8 -6 9 2.98 0.3
 8 -6 9 2.82 0.2
 8 6 9 3.04 0.21
 8 6 9 2.82 0.28
 8 6 9 2.81 0.26
 8 6 9 3.72 0.32
 7 -7 -9 5.06 0.29
 -7 -7 9 4.52 0.37
 7 -7 -9 4.35 0.37
 -7 -7 9 4.75 0.31
 7 -7 -9 4.92 0.38
 -7 -7 9 3.25 0.73
 -7 7 9 4.44 0.33
 -7 7 9 4.43 0.31
 -7 7 9 4.62 0.3
 -7 7 9 4.66 0.25
 -6 -7 9 2.81 0.8
 -6 -7 9 3.84 0.39
 6 -7 -9 4.12 0.4
 6 -7 -9 3.48 0.38
 -6 -7 9 3.7 0.34
 -6 7 9 3.69 0.3
 -6 7 9 4.24 0.37
 -6 7 9 3.74 0.34
 -6 7 9 3.81 0.36
 5 -7 -9 19.3 0.96
 5 -7 -9 18.3 0.86
 5 -7 -9 20.02 0.82
 -5 -7 9 19.68 0.99
 -5 -7 9 18.66 0.74
 -5 -7 9 19.24 1.89
 -5 7 9 20.66 0.81
 -5 7 9 20.52 0.81
 -5 7 9 19.85 0.85
 -5 7 9 20.25 0.77
 4 -7 -9 1.1 0.28
 4 -7 -9 0.82 0.23
 4 -7 -9 1.03 0.26
 -4 -7 9 1.49 0.27
 -4 -7 9 0.34 0.24
 4 -7 -9 0.75 0.22
 -4 -7 9 0.47 0.18
 -4 7 9 1.05 0.24
 -4 7 9 0.99 0.3
 -4 7 9 0.92 0.25
 -4 7 9 1.66 0.3
 -3 -7 9 9.97 1.57
 -3 -7 9 9.69 0.4
 -3 -7 9 9.05 0.69
 -3 -7 9 10.47 0.56
 3 -7 -9 9.48 0.62
 3 -7 -9 9.46 0.58
 3 -7 -9 8.74 0.54
 3 -7 -9 9.36 0.64
 3 7 -9 10.66 0.6
 -3 7 9 10.42 0.47
 -3 7 9 10.47 0.62
 -3 7 9 10.13 0.58
 -2 -7 9 0.21 0.18
 2 -7 -9 0.2 0.2
 2 -7 -9 0.06 0.17
 -2 -7 9 0.14 0.12
 2 -7 -9 0.09 0.22
 -2 -7 9 -0.02 0.13
 2 -7 -9 0.37 0.17
 2 -7 -9 0.35 0.2
 -2 -7 9 0.32 0.14
 -2 7 9 0.13 0.3
 -2 7 9 0.23 0.19
 2 7 -9 0.11 0.19
 -2 7 9 0.03 0.15
 -2 7 9 0.13 0.19
 -1 7 9 3.14 0.4
 1 7 -9 3.48 0.43
 -1 7 9 3.1 0.36
 -1 7 9 2.79 0.27
 1 7 -9 2.48 0.36
 1 7 -9 2.71 0.52
 -1 7 9 2.39 0.35
 0 -7 -9 0.51 0.2
 0 -7 9 0.17 0.19
 0 -7 9 0.34 0.2
 0 -7 9 0.56 0.19
 0 -7 9 0.59 0.19
 0 -7 9 0.23 0.2
 0 -7 9 0.23 0.21
 0 7 9 0.17 0.18
 0 7 -9 0.31 0.21
 0 7 9 0.32 0.22
 0 7 -9 0.41 0.23
 0 7 9 0.36 0.18
 0 7 9 0.36 0.2
 0 7 -9 0.54 0.23
 -1 -7 -9 6.31 0.42
 1 -7 9 6.72 0.44
 1 -7 9 5.87 0.48
 1 -7 9 6.35 0.28
 1 -7 9 6.49 0.51
 1 -7 9 6.52 0.46
 1 -7 9 6.27 0.48
 1 -7 9 6.68 0.55
 -1 7 -9 6.58 0.62
 1 7 9 6.38 0.51
 -1 7 -9 5.83 0.47
 1 7 9 6.18 0.49
 1 7 9 5.59 0.49
 -1 7 -9 6.48 0.48
 1 7 9 5.67 0.42
 2 -7 9 1.17 0.19
 2 -7 9 0.86 0.27
 2 -7 9 1.4 0.32
 2 -7 9 1.06 0.27
 -2 -7 -9 1.2 0.21
 2 -7 9 1.51 0.28
 2 -7 9 1.19 0.26
 2 -7 9 1.13 0.27
 2 7 9 1.11 0.26
 -2 7 -9 0.97 0.26
 2 7 9 1.18 0.28
 -2 7 -9 0.84 0.22
 -2 7 -9 1.54 0.31
 2 7 9 1.09 0.27
 -3 -7 -9 0.9 0.14
 -3 -7 -9 0.27 0.25
 3 -7 9 1 0.26
 3 -7 9 1.21 0.3
 3 -7 9 0.63 0.22
 3 -7 9 0.41 0.26
 3 -7 9 0.75 0.19
 3 -7 9 0.36 0.23
 3 7 9 0.92 0.25
 3 7 9 0.53 0.23
 -3 7 -9 1.33 0.28
 3 7 9 0.74 0.22
 -3 7 -9 2.08 0.5
 -3 7 -9 0.91 0.26
 -3 7 -9 2.34 0.41
 4 -7 9 1.57 0.29
 4 -7 9 1.36 0.29
 4 -7 9 2.04 0.32
 4 -7 9 1.82 0.37
 4 -7 9 2.01 0.28
 4 -7 9 1.64 0.33
 4 7 9 1.64 0.3
 -4 7 -9 1.06 0.26
 4 7 9 1.67 0.3
 4 7 9 1.66 0.29
 -4 7 -9 1.71 0.28
 5 -7 9 11.78 0.64
 -5 -7 -9 12.78 1.42
 -5 -7 -9 12.79 0.64
 5 -7 9 13.21 0.56
 5 -7 9 12.52 0.69
 -5 7 -9 12.89 0.54
 5 7 9 12.64 0.61
 -5 7 -9 13.14 0.62
 5 7 9 13.32 0.63
 5 7 9 12.69 0.63
 -5 7 -9 13.76 0.65
 6 -7 9 0.84 0.19
 -6 -7 -9 0.47 0.19
 6 -7 9 1.41 0.27
 -6 -7 -9 0.85 0.2
 6 -7 9 1.05 0.23
 6 7 9 1.54 0.26
 6 7 9 1.37 0.24
 -6 7 -9 1.21 0.23
 -6 7 -9 1.11 0.22
 6 7 9 1.21 0.22
 -7 -7 -9 11.18 1.14
 7 -7 9 12.02 0.45
 -7 -7 -9 11.63 0.45
 7 -7 9 12.24 0.56
 7 7 9 12.59 0.5
 7 7 9 12.3 0.51
 -7 7 -9 12.45 0.4
 7 7 9 12.19 0.51
 -5 -8 9 0.01 0.09
 5 -8 -9 -0.1 0.15
 -5 -8 9 -0.11 0.11
 5 -8 -9 0.03 0.14
 5 8 -9 -0.03 0.13
 -5 8 9 -0.02 0.12
 5 8 -9 -0.07 0.12
 -5 8 9 0.11 0.11
 -5 8 9 -0.1 0.12
 5 8 -9 0.05 0.14
 -5 8 9 -0.11 0.14
 -4 -8 9 13.55 0.76
 4 -8 -9 13.79 0.56
 4 -8 -9 12.99 0.66
 -4 -8 9 12.87 1.43
 4 8 -9 14.24 0.84
 -4 8 9 14.02 0.61
 -4 8 9 14.33 0.61
 4 8 -9 15.06 0.66
 4 8 -9 14.34 0.61
 -4 8 9 14.65 0.62
 -3 -8 9 1.5 0.15
 3 -8 -9 1.43 0.27
 3 -8 -9 1.42 0.25
 -3 8 9 1.66 0.27
 3 8 -9 1.2 0.23
 3 8 -9 1.05 0.28
 -3 8 9 1.45 0.14
 3 8 -9 1.26 0.24
 -3 8 9 1.51 0.26
 2 -8 -9 35.11 1.06
 -2 -8 9 34.7 0.94
 -2 -8 9 38.34 2.68
 2 8 -9 36.69 1.16
 2 8 -9 37.05 1.63
 -2 8 9 37.13 1.16
 -2 8 9 36.42 1.02
 -2 8 9 36.58 1.17
 2 8 -9 38.45 1.27
 -1 8 9 5.88 0.45
 1 8 -9 6.7 0.47
 -1 8 9 6.81 0.49
 1 8 -9 6.54 0.47
 -1 8 9 7.15 0.43
 1 8 -9 6.69 0.6
 0 -8 9 27.47 0.87
 0 -8 9 26.58 0.89
 0 -8 -9 27.06 0.82
 0 8 9 28.14 0.78
 0 8 9 28.71 1
 0 8 -9 27.49 0.97
 0 8 -9 27.89 1.32
 0 8 -9 27.69 1.01
 0 8 9 27.91 1
 0 8 9 29.2 0.97
 1 -8 9 9.19 0.4
 1 -8 9 8.84 0.56
 1 -8 9 8.13 0.53
 1 -8 9 8.03 0.57
 1 -8 9 9.72 0.51
 1 -8 9 8.28 0.5
 -1 -8 -9 8.52 0.37
 -1 8 -9 9.27 0.64
 1 8 9 8.74 0.55
 1 8 9 9.13 0.43
 1 8 9 9.22 0.55
 1 8 9 8.45 0.53
 -1 8 -9 9.1 0.54
 -1 8 -9 9.01 0.5
 2 -8 9 0.99 0.23
 2 -8 9 0.43 0.21
 2 -8 9 1.1 0.21
 2 -8 9 1.2 0.28
 2 -8 9 0.98 0.25
 2 8 9 1.1 0.24
 2 8 9 0.77 0.25
 2 8 9 0.88 0.19
 -2 8 -9 0.58 0.22
 2 8 9 0.42 0.2
 -2 8 -9 0.86 0.23
 -2 8 -9 2.2 0.32
 -2 8 -9 2.05 0.42
 3 -8 9 3.03 0.38
 -3 -8 -9 2.58 0.85
 3 -8 9 2.92 0.39
 -3 -8 -9 3.68 0.26
 3 -8 9 3.71 0.33
 3 8 9 3.04 0.29
 3 8 9 3.49 0.34
 3 8 9 3.29 0.36
 -3 8 -9 3.71 0.37
 -3 8 -9 3.84 0.35
 4 -8 9 15.8 0.71
 4 -8 9 15.36 0.6
 -4 -8 -9 15.55 1.52
 4 -8 9 14.16 0.69
 -4 8 -9 14.77 0.61
 -4 8 -9 15.78 0.56
 4 8 9 15.14 0.62
 4 8 9 15.9 0.59
 -4 8 -9 15.13 0.67
 4 8 9 15.79 0.65
 -5 -8 -9 5.07 0.33
 5 -8 9 3.95 0.38
 5 -8 9 4.66 0.34
 -5 -8 -9 3.5 0.74
 5 8 9 4.4 0.3
 5 8 9 4.1 0.3
 5 8 9 4.82 0.33
 -5 8 -9 3.98 0.33
 2 9 -9 1.08 0.23
 2 9 -9 0.79 0.14
 -2 9 9 0.88 0.17
 2 9 -9 0.96 0.18
 -2 9 9 0.72 0.16
 1 -9 -9 16.21 0.59
 -1 -9 9 17.23 0.57
 -1 -9 9 16.26 0.48
 -1 9 9 16.87 0.62
 1 9 -9 17.16 0.61
 -1 9 9 16.98 0.62
 1 9 -9 16.94 0.78
 -1 9 9 16.95 0.5
 1 9 -9 16.82 0.62
 0 -9 9 0.16 0.11
 0 -9 9 0.44 0.14
 0 -9 -9 0.14 0.13
 0 9 -9 0.17 0.11
 0 9 -9 -0.01 0.12
 0 9 9 0.04 0.14
 0 9 -9 0.12 0.15
 0 9 9 0.24 0.13
 0 9 9 0.23 0.14
 1 -9 9 14.85 0.46
 -1 -9 -9 14.78 0.47
 1 -9 9 14.58 0.52
 -1 -9 -9 14.39 0.68
 1 -9 9 15 0.59
 -1 9 -9 14.31 0.56
 -1 9 -9 15.52 0.57
 1 9 9 14.52 0.54
 1 9 9 14.84 0.58
 1 9 9 14.99 0.58
 2 -9 9 2.01 0.27
 -2 -9 -9 2.83 0.3
 2 -9 9 1.83 0.2
 2 -9 9 2.4 0.25
 2 9 9 2.78 0.27
 2 9 9 2.38 0.25
 2 9 9 2.24 0.27
 -2 9 -9 2.45 0.24
 -11 0 10 1.12 0.17
 -11 0 10 0.84 0.17
 -11 0 10 1.42 0.21
 -10 0 10 1.02 0.22
 -10 0 10 1.01 0.22
 -10 0 10 0.99 0.22
 -10 0 10 1.09 0.24
 -9 0 10 13.69 0.69
 -9 0 10 14.76 0.44
 -9 0 10 14.83 0.7
 -9 0 10 14.56 0.69
 -9 0 10 13.39 0.71
 -8 0 10 20.07 0.86
 -8 0 10 20.23 0.58
 -8 0 10 21.32 0.95
 -8 0 10 19.71 0.83
 -7 0 10 20.36 0.89
 -7 0 10 17.4 0.79
 -7 0 10 19.42 0.55
 -7 0 10 18.18 0.77
 -6 0 10 31.6 1.2
 6 0 -10 32.65 0.93
 -6 0 10 31.58 1.27
 -5 0 10 2.13 0.29
 -5 0 10 2.78 0.32
 5 0 -10 2.28 0.13
 4 0 -10 1.91 0.1
 -4 0 10 1.78 0.25
 -4 0 10 1.98 0.27
 -3 0 10 22.2 0.81
 3 0 -10 23.13 0.63
 -3 0 10 22.79 0.84
 -2 0 10 0.01 0.1
 2 0 -10 0.03 0.05
 1 0 -10 499.81 11.95
 -1 0 10 467.62 11.75
 0 0 -10 50.53 1.35
 0 0 10 43.31 1.38
 -1 0 -10 398.1 9.77
 1 0 10 383.38 9.56
 -2 0 -10 20.46 0.75
 2 0 10 20.64 0.77
 3 0 10 60.21 1.77
 3 0 10 61.07 1.71
 4 0 10 228.24 5.44
 4 0 10 222.13 5.72
 5 0 10 137.87 3.53
 6 0 10 14.87 0.77
 6 0 10 14.76 0.92
 7 0 10 10.51 0.68
 7 0 10 10.31 0.59
 -7 0 -10 10.9 0.56
 7 0 10 10.62 0.77
 -8 0 -10 0.77 0.2
 8 0 10 0.58 0.24
 8 0 10 0.52 0.21
 8 0 10 0.54 0.23
 9 0 10 0.57 0.21
 -9 0 -10 0.58 0.23
 9 0 10 0.55 0.25
 9 0 10 0.37 0.17
 -10 0 -10 3.85 0.35
 10 0 10 3.46 0.38
 10 0 10 3.67 0.3
 10 0 10 4.13 0.4
 -11 -1 10 0.22 0.14
 -11 -1 10 0.14 0.14
 -11 -1 10 0.11 0.06
 -11 -1 10 0.16 0.12
 -11 1 10 0.05 0.13
 -11 1 10 0.15 0.08
 -11 1 10 0.28 0.13
 -10 -1 10 2.47 0.33
 -10 -1 10 2.46 0.26
 -10 -1 10 2.82 0.32
 -10 -1 10 2.03 0.31
 -10 1 10 3.32 0.35
 -10 1 10 2.96 0.35
 -10 1 10 2.57 0.31
 -10 1 10 2.98 0.17
 -9 -1 10 16.25 0.76
 -9 -1 10 14.62 0.71
 -9 -1 10 16.66 0.73
 -9 -1 10 16.26 0.71
 -9 1 10 16.4 0.76
 -9 1 10 16.72 0.74
 -9 1 10 16.44 0.84
 -9 1 10 16.26 0.53
 -8 -1 10 17.95 0.79
 -8 -1 10 18.42 0.8
 -8 -1 10 17.9 0.48
 -8 -1 10 18.7 0.79
 -8 1 10 17.69 0.87
 -8 1 10 17.99 0.58
 -8 1 10 17.62 0.8
 -8 1 10 19.11 0.89
 -8 1 10 17.61 0.78
 -7 -1 10 12.06 0.64
 -7 -1 10 13.23 0.67
 7 -1 -10 12.47 0.52
 7 -1 -10 13.82 0.75
 -7 1 10 13.16 0.66
 -7 1 10 11.91 0.45
 -7 1 10 12.8 0.71
 -7 1 10 12.13 0.66
 -7 1 10 13.05 0.67
 6 -1 -10 6.58 0.34
 6 -1 -10 6.29 0.3
 -6 1 10 6.62 0.51
 -6 1 10 5.29 0.48
 5 -1 -10 17.05 0.59
 -5 -1 10 17.64 0.82
 -5 1 10 16.57 0.76
 -5 1 10 15.31 0.77
 -5 1 10 17.94 0.79
 -4 -1 10 3.11 0.3
 4 -1 -10 3.23 0.2
 -4 -1 10 2.29 0.29
 -4 1 10 3.19 0.32
 -4 1 10 2.68 0.3
 3 -1 -10 10.06 0.38
 -3 -1 10 8.81 0.45
 -3 -1 10 9.75 0.48
 -3 1 10 9.85 0.48
 -3 1 10 8.84 0.48
 -3 1 10 9.47 0.48
 -2 -1 10 104.82 2.81
 2 -1 -10 105.51 2.73
 -2 1 10 112.51 2.87
 -2 1 10 107.49 2.97
 -2 1 10 114.97 2.84
 1 -1 -10 19.42 0.63
 -1 -1 10 17.26 0.69
 -1 1 10 17.96 0.71
 1 1 -10 19.73 0.61
 -1 1 10 19.48 0.7
 0 -1 -10 138.63 3.58
 0 -1 10 136.99 3.58
 0 1 10 141.3 3.76
 0 1 10 153.25 3.65
 0 1 -10 146.21 3.78
 1 -1 10 3.49 0.28
 -1 1 -10 4.06 0.28
 1 1 10 4.05 0.29
 -2 -1 -10 55.25 1.62
 2 -1 10 54.27 1.63
 2 -1 10 54.4 1.57
 2 1 10 53.94 1.61
 -2 1 -10 57.84 1.66
 3 -1 10 59.48 1.54
 3 -1 10 58.41 1.5
 3 -1 10 57.99 1.69
 3 -1 10 59.57 1.78
 3 1 10 59.27 1.64
 3 1 10 57.22 1.68
 4 -1 10 135.69 3.67
 4 -1 10 137.97 3.5
 -4 1 -10 137.21 3.34
 5 -1 10 15.77 0.73
 5 -1 10 16.56 0.76
 -5 1 -10 16.89 0.71
 6 -1 10 8.32 0.56
 6 -1 10 9.26 0.59
 6 -1 10 8.73 0.56
 -6 -1 -10 8.37 0.5
 6 -1 10 8.36 0.66
 6 1 10 8.95 0.71
 6 1 10 9.27 0.59
 7 -1 10 22.27 1.17
 7 -1 10 23.81 0.92
 7 -1 10 22.61 1.01
 7 -1 10 22.27 0.98
 -7 -1 -10 23.24 0.83
 -7 1 -10 23.33 0.87
 7 1 10 22.29 1.21
 7 1 10 23.07 0.95
 -7 1 -10 23.48 0.75
 8 -1 10 3.16 0.41
 -8 -1 -10 3.2 0.42
 -8 -1 -10 3.31 0.3
 8 -1 10 2.98 0.45
 8 -1 10 3.12 0.35
 8 1 10 2.95 0.46
 8 1 10 2.98 0.45
 -8 1 -10 3.5 0.32
 8 1 10 3.5 0.38
 9 -1 10 3.18 0.42
 -9 -1 -10 2.62 0.36
 9 -1 10 2.95 0.33
 9 -1 10 2.79 0.41
 9 1 10 3.28 0.36
 -9 1 -10 3.4 0.41
 9 1 10 3.02 0.43
 9 1 10 3.3 0.46
 10 -1 10 16.68 0.68
 10 -1 10 15.48 0.76
 -10 -1 -10 16.68 0.63
 10 -1 10 16.26 0.59
 10 -1 10 17.87 0.77
 10 1 10 17.42 0.66
 -10 1 -10 17.14 0.67
 10 1 10 17.01 0.85
 -11 2 10 2.31 0.24
 -11 2 10 1.64 0.24
 -11 2 10 2.1 0.23
 -10 -2 10 0.26 0.18
 -10 -2 10 0.15 0.09
 -10 -2 10 0.58 0.18
 -10 -2 10 0.25 0.16
 -10 2 10 0.45 0.18
 -10 2 10 0.13 0.1
 -10 2 10 -0.05 0.15
 -10 2 10 0.3 0.09
 -9 -2 10 6.76 0.47
 -9 -2 10 6.98 0.48
 9 -2 -10 6.66 0.55
 -9 -2 10 6.19 0.41
 -9 -2 10 7.04 0.47
 -9 2 10 5.51 0.45
 -9 2 10 6.68 0.49
 -9 2 10 6.91 0.52
 -9 2 10 6.14 0.32
 8 -2 -10 2.4 0.44
 -8 -2 10 3.02 0.38
 -8 -2 10 3.2 0.37
 -8 2 10 2.75 0.36
 -8 2 10 2.07 0.23
 -8 2 10 2.97 0.42
 -8 2 10 1.86 0.31
 -8 2 10 2.09 0.33
 7 -2 -10 7.28 0.42
 7 -2 -10 6.89 0.48
 7 -2 -10 7.42 0.59
 -7 2 10 7.09 0.53
 -7 2 10 7.55 0.51
 -7 2 10 6.66 0.49
 -7 2 10 6.38 0.5
 -7 2 10 7.45 0.37
 6 -2 -10 2.96 0.28
 6 -2 -10 3.51 0.35
 6 -2 -10 3.23 0.26
 -6 2 10 3.33 0.38
 -6 2 10 3.04 0.41
 -6 2 10 3.54 0.4
 -6 2 10 3 0.19
 -6 2 10 3.55 0.25
 5 -2 -10 6.56 0.34
 5 -2 -10 6.66 0.37
 -5 2 10 6.51 0.48
 -5 2 10 5.61 0.44
 4 -2 -10 25.34 0.79
 4 -2 -10 24.72 0.84
 -4 2 10 25.69 1
 -4 2 10 24.19 0.95
 -4 2 10 25.73 0.95
 3 -2 -10 1.35 0.18
 -3 -2 10 1.49 0.22
 -3 2 10 1.56 0.25
 -3 2 10 1.49 0.24
 -3 2 10 1.66 0.24
 2 -2 -10 6.55 0.34
 -2 -2 10 6.33 0.38
 -2 2 10 6.7 0.4
 -2 2 10 6.21 0.39
 -2 2 10 6.32 0.39
 1 -2 -10 44.23 1.29
 -1 -2 10 42.52 1.18
 -1 -2 10 42.31 1.33
 -1 2 10 44.02 1.29
 -1 2 10 44.94 1.31
 -1 2 10 40.69 1.32
 0 -2 10 18.07 0.66
 0 -2 -10 18.81 0.68
 0 -2 10 18.79 0.7
 0 -2 10 17.44 0.72
 0 -2 10 18.13 0.64
 0 2 10 17.26 0.68
 0 2 10 19.01 0.69
 1 -2 10 22.97 0.82
 -1 -2 -10 23.34 0.81
 1 -2 10 21.75 0.73
 1 -2 10 21.86 0.76
 1 -2 10 21.02 0.83
 1 2 10 22.15 0.79
 -1 2 -10 22.92 0.81
 1 2 10 23.39 0.79
 2 -2 10 2.24 0.27
 2 -2 10 2.51 0.24
 2 -2 10 2.67 0.28
 2 -2 10 2.67 0.24
 2 2 10 2.51 0.23
 -2 2 -10 2.45 0.26
 3 -2 10 0.69 0.16
 3 -2 10 0.63 0.15
 3 -2 10 0.87 0.2
 3 -2 10 0.71 0.2
 -3 2 -10 0.71 0.18
 4 -2 10 1.71 0.27
 4 -2 10 1.44 0.22
 4 -2 10 1.56 0.23
 4 -2 10 1.09 0.24
 -4 2 -10 1.44 0.23
 5 -2 10 35 1.26
 5 -2 10 36.16 1.27
 5 -2 10 35.65 1.3
 -5 2 -10 36.96 1.21
 6 -2 10 0.09 0.18
 6 -2 10 0.08 0.2
 6 -2 10 0.02 0.15
 6 -2 10 0.15 0.18
 6 -2 10 0.13 0.18
 -6 -2 -10 0.1 0.19
 6 2 10 0.24 0.17
 -6 2 -10 0.18 0.2
 -6 2 -10 0.12 0.23
 6 2 10 0.15 0.2
 7 -2 10 1.72 0.34
 7 -2 10 2.28 0.36
 7 -2 10 2.18 0.38
 -7 -2 -10 1.38 0.24
 7 -2 10 1.21 0.23
 7 -2 10 1.73 0.37
 7 2 10 1.83 0.44
 7 2 10 1.51 0.27
 -7 2 -10 1.86 0.31
 -7 2 -10 1.64 0.24
 8 -2 10 26.14 1.01
 8 -2 10 26.08 0.95
 8 -2 10 26.64 1.11
 8 -2 10 25.42 1.08
 8 -2 10 27.01 1.25
 -8 -2 -10 25.71 0.98
 8 2 10 26.24 1.31
 8 2 10 25.86 1.01
 -8 2 -10 25.34 0.87
 -9 -2 -10 8.11 0.5
 9 -2 10 7.46 0.54
 9 -2 10 8.61 0.59
 9 -2 10 7.95 0.43
 9 -2 10 7.28 0.52
 -9 2 -10 8.47 0.31
 9 2 10 8.53 0.66
 -9 2 -10 8.34 0.55
 9 2 10 8.71 0.51
 10 -2 10 0.99 0.21
 10 -2 10 1.2 0.24
 -10 -2 -10 0.95 0.17
 -10 2 -10 1.16 0.21
 10 2 10 0.89 0.19
 10 2 10 1.25 0.22
 10 -3 -10 3.27 0.31
 -10 -3 10 3.26 0.25
 -10 -3 10 3.25 0.31
 -10 3 10 3.55 0.34
 -10 3 10 3.39 0.3
 -10 3 10 3.41 0.32
 -10 3 10 3.29 0.22
 -9 -3 10 0.53 0.21
 9 -3 -10 0.41 0.15
 -9 -3 10 0.28 0.1
 9 -3 -10 -0.01 0.21
 -9 3 10 0.47 0.2
 -9 3 10 0.18 0.13
 -9 3 10 0.15 0.11
 -9 3 10 0.01 0.16
 8 -3 -10 0.14 0.22
 8 -3 -10 0.08 0.14
 -8 -3 10 -0.1 0.17
 -8 3 10 0.22 0.2
 -8 3 10 0.04 0.11
 -8 3 10 -0.02 0.11
 -8 3 10 0 0.2
 -8 3 10 0 0.17
 7 -3 -10 7.66 0.47
 -7 -3 10 7.84 0.52
 7 -3 -10 8.22 0.61
 7 -3 -10 8.11 0.53
 -7 -3 10 7.8 0.28
 -7 3 10 8.58 0.59
 -7 3 10 7.91 0.51
 -7 3 10 7.06 0.57
 -7 3 10 7.8 0.31
 -7 3 10 7.02 0.37
 -7 3 10 7.74 0.55
 -7 3 10 7.48 0.4
 -6 -3 10 3.56 0.2
 6 -3 -10 3.28 0.41
 6 -3 -10 4.5 0.39
 6 -3 -10 3.61 0.32
 -6 3 10 2.98 0.28
 -6 3 10 4 0.27
 -6 3 10 3.69 0.42
 -6 3 10 3.66 0.31
 -6 3 10 3.88 0.4
 -6 3 10 3.85 0.42
 -6 3 10 3.76 0.41
 5 -3 -10 4.45 0.36
 5 -3 -10 4.63 0.32
 5 -3 -10 5.22 0.4
 -5 3 10 4.44 0.44
 -5 3 10 4.21 0.44
 -5 3 10 5.34 0.45
 -5 3 10 5.27 0.41
 4 -3 -10 10.44 0.52
 4 -3 -10 10.43 0.48
 -4 3 10 10.83 0.63
 -4 3 10 10.94 0.61
 -4 3 10 10.91 0.56
 3 -3 -10 -0.03 0.09
 3 -3 -10 0.02 0.1
 -3 3 10 -0.22 0.08
 -3 3 10 0.29 0.18
 -3 3 10 0.02 0.12
 -3 3 10 0.03 0.12
 -2 -3 10 1.96 0.25
 2 -3 -10 1.8 0.22
 -2 -3 10 1.53 0.22
 2 -3 -10 1.62 0.2
 -2 3 10 1.59 0.24
 -2 3 10 1.47 0.24
 -2 3 10 1.92 0.25
 1 -3 -10 12.04 0.51
 -1 -3 10 10.87 0.51
 -1 -3 10 10.85 0.53
 -1 -3 10 11.98 0.57
 1 -3 -10 11.91 0.55
 -1 -3 10 11.97 0.55
 -1 3 10 10.96 0.55
 -1 3 10 11.59 0.54
 -1 3 10 11.65 0.56
 0 -3 10 -0.01 0.1
 0 -3 10 0.14 0.12
 0 -3 -10 0.14 0.13
 0 -3 10 -0.05 0.12
 0 -3 -10 -0.01 0.11
 0 -3 10 -0.02 0.11
 0 3 10 0.03 0.1
 0 3 10 -0.03 0.12
 0 3 10 0.07 0.1
 1 -3 10 2.31 0.28
 1 -3 10 2.18 0.24
 1 -3 10 1.86 0.24
 1 -3 10 1.65 0.25
 -1 -3 -10 1.87 0.23
 -1 3 -10 2.5 0.26
 1 3 10 2.36 0.24
 2 -3 10 13.79 0.68
 2 -3 10 14.57 0.6
 2 -3 10 14.42 0.66
 2 -3 10 14.41 0.61
 -2 3 -10 13.84 0.66
 2 3 10 14.66 0.61
 -2 3 -10 14.75 0.64
 3 -3 10 45.69 1.32
 3 -3 10 48.19 1.55
 3 -3 10 45.13 1.46
 3 -3 10 44.46 1.34
 3 -3 10 44.79 1.47
 -3 3 -10 49.13 1.48
 4 -3 10 5.62 0.47
 4 -3 10 5.42 0.39
 4 -3 10 5.47 0.45
 4 -3 10 5.32 0.39
 4 -3 10 4.74 0.43
 -4 3 -10 5.32 0.4
 5 -3 10 0.3 0.18
 5 -3 10 0.69 0.23
 -5 -3 -10 0.42 0.23
 5 -3 10 0.32 0.22
 5 -3 10 0.32 0.17
 5 -3 10 0.3 0.17
 5 -3 10 0.32 0.21
 5 -3 10 0.42 0.23
 5 3 10 0.16 0.21
 -5 3 -10 0.3 0.18
 -5 3 -10 -0.61 0.33
 6 -3 10 3.71 0.4
 6 -3 10 2.99 0.42
 6 -3 10 3.17 0.39
 6 -3 10 3.12 0.4
 -6 -3 -10 3.05 1.04
 6 -3 10 2.73 0.32
 6 -3 10 4.26 0.46
 6 3 10 3.24 0.5
 -6 3 -10 3.58 0.45
 6 3 10 3.23 0.38
 -6 3 -10 3.33 0.37
 -6 3 -10 3.34 0.36
 7 -3 10 0.25 0.16
 7 -3 10 -0.01 0.2
 7 -3 10 0.06 0.19
 7 -3 10 0.31 0.24
 7 -3 10 0.34 0.21
 7 -3 10 0.19 0.17
 -7 3 -10 0.23 0.15
 -7 3 -10 0.87 0.25
 7 3 10 0.29 0.19
 7 3 10 0.19 0.2
 8 -3 10 1.35 0.21
 8 -3 10 1.31 0.29
 -8 -3 -10 1.42 0.29
 8 -3 10 1.01 0.29
 8 -3 10 1.18 0.3
 8 -3 10 1.08 0.22
 8 3 10 1.24 0.29
 8 3 10 1.19 0.24
 -8 3 -10 1.37 0.23
 9 -3 10 -0.08 0.17
 -9 -3 -10 0.01 0.16
 9 -3 10 0 0.18
 9 3 10 0.08 0.15
 9 3 10 0.11 0.14
 10 -3 10 3.1 0.34
 -10 -3 -10 3.45 0.25
 10 -3 10 2.82 0.27
 10 3 10 3.17 0.24
 10 3 10 3.53 0.31
 -10 3 -10 3.79 0.31
 -10 -4 10 0.25 0.07
 -10 -4 10 0.14 0.11
 -10 4 10 0.25 0.12
 -10 4 10 0.38 0.1
 -10 4 10 0.41 0.14
 -10 4 10 0.28 0.11
 9 -4 -10 8.01 0.45
 -9 -4 10 7.45 0.45
 -9 -4 10 7.69 0.44
 9 -4 -10 7.03 0.36
 -9 4 10 8.05 0.38
 -9 4 10 7.52 0.45
 -9 4 10 8.09 0.57
 -9 4 10 8 0.47
 -8 -4 10 0.08 0.09
 8 -4 -10 -0.1 0.15
 8 -4 -10 0.1 0.21
 8 -4 -10 0.09 0.16
 -8 -4 10 0.04 0.18
 8 -4 -10 -0.05 0.13
 8 -4 -10 0.26 0.21
 -8 4 10 0.03 0.13
 -8 4 10 -0.2 0.17
 -8 4 10 0.16 0.13
 -8 4 10 0.11 0.16
 7 -4 -10 17.71 0.8
 -7 -4 10 16.11 0.77
 7 -4 -10 15.64 0.72
 7 -4 -10 15.78 0.86
 7 -4 -10 16.65 0.75
 7 -4 -10 16.7 0.6
 7 -4 -10 17.09 0.84
 -7 -4 10 14.27 0.69
 -7 -4 10 15.52 0.49
 -7 4 10 15.4 0.61
 -7 4 10 15.72 0.8
 -7 4 10 15.69 0.53
 -7 4 10 14.74 0.72
 -7 4 10 15.36 0.92
 -7 4 10 16.32 0.76
 -7 4 10 16.05 0.64
 6 -4 -10 4.65 0.4
 6 -4 -10 4.67 0.43
 -6 -4 10 4.32 0.37
 -6 -4 10 3.81 0.24
 -6 -4 10 5.78 1.22
 6 -4 -10 4.38 0.41
 6 -4 -10 4.08 0.47
 -6 -4 10 4.4 0.42
 6 -4 -10 4.66 0.31
 6 -4 -10 4.04 0.37
 -6 4 10 3.78 0.35
 -6 4 10 4.4 0.42
 -6 4 10 4.38 0.43
 -6 4 10 4.51 0.46
 -6 4 10 4.42 0.35
 -6 4 10 4.6 0.33
 -6 4 10 4.33 0.49
 5 -4 -10 29.21 0.84
 -5 -4 10 27.42 1.15
 5 -4 -10 28.47 1.03
 5 -4 -10 27.96 1.17
 5 -4 -10 29.35 1.06
 -5 -4 10 26.1 0.78
 5 -4 -10 28.61 1.04
 -5 -4 10 26.82 0.98
 5 -4 -10 30.43 1.04
 -5 4 10 29.03 1.13
 -5 4 10 28.03 1.03
 -5 4 10 29.11 1.09
 -5 4 10 29.05 0.99
 -5 4 10 28.38 0.9
 -5 4 10 28.65 1.16
 -5 4 10 30.45 1.06
 -5 4 10 27.69 1.33
 -5 4 10 28.3 0.95
 4 -4 -10 32.03 0.9
 4 -4 -10 32.55 1.12
 4 -4 -10 33.1 1.24
 4 -4 -10 32.04 1.09
 4 -4 -10 33.52 1.12
 4 -4 -10 30.2 1.17
 -4 4 10 31.58 1.11
 -4 4 10 33.24 1.19
 -4 4 10 30.41 1.21
 -4 4 10 32.71 1.19
 -4 4 10 33.19 1.01
 -4 4 10 34.35 1.16
 3 -4 -10 17.04 0.71
 3 -4 -10 16.44 0.68
 3 -4 -10 16.43 0.68
 3 -4 -10 15.65 0.73
 -3 4 10 17.26 0.8
 -3 4 10 16.78 0.73
 -3 4 10 17.47 0.82
 2 -4 -10 34.24 1.12
 2 -4 -10 33.94 1.09
 -2 -4 10 33.49 1.21
 -2 -4 10 36.27 1.09
 2 -4 -10 32.16 1.19
 2 -4 -10 35.75 1.15
 -2 4 10 35.71 1.26
 -2 4 10 34.76 1.24
 1 -4 -10 15.51 0.67
 1 -4 -10 16.3 0.65
 -1 -4 10 15.98 0.65
 -1 -4 10 13.93 0.71
 -1 -4 10 15.28 0.67
 1 -4 -10 15.42 0.66
 -1 4 10 15.63 0.71
 1 4 -10 16.32 0.67
 -1 4 10 15.24 0.68
 -1 4 10 14.97 0.71
 0 -4 -10 11.36 0.58
 0 -4 10 11.8 0.61
 0 -4 10 10.99 0.54
 0 -4 10 12.52 0.65
 0 -4 10 12.59 0.59
 0 -4 -10 12.83 0.55
 0 4 -10 11.97 0.58
 0 4 10 12.22 0.61
 1 -4 10 1.67 0.27
 1 -4 10 1.71 0.27
 1 -4 10 2.15 0.27
 -1 -4 -10 1.54 0.26
 1 -4 10 1.35 0.25
 -1 -4 -10 1.5 0.18
 1 -4 10 1.83 0.32
 1 4 10 1.76 0.25
 -1 4 -10 1.43 0.25
 -1 4 -10 1.5 0.23
 2 -4 10 8.36 0.47
 2 -4 10 7.53 0.47
 2 -4 10 8.06 0.51
 2 -4 10 7.63 0.53
 2 -4 10 7.23 0.53
 -2 4 -10 8.3 0.5
 3 -4 10 0.93 0.23
 3 -4 10 1.27 0.24
 3 -4 10 1.14 0.27
 3 -4 10 1.37 0.28
 3 -4 10 1.02 0.24
 -3 4 -10 0.96 0.25
 -3 4 -10 0.83 0.22
 4 -4 10 6.48 0.51
 4 -4 10 6.87 0.47
 4 -4 10 6.43 0.45
 4 -4 10 7.35 0.54
 4 -4 10 6.26 0.47
 4 -4 10 5.74 0.49
 4 4 10 6.47 0.48
 -4 4 -10 5.52 0.66
 -4 4 -10 5.32 0.53
 -4 4 -10 6.72 0.49
 4 4 10 7.04 0.6
 -5 -4 -10 1.27 0.25
 5 -4 10 0.63 0.25
 5 -4 10 0.92 0.24
 5 -4 10 0.88 0.22
 5 -4 10 1.16 0.24
 5 -4 10 1.2 0.28
 5 -4 10 1.16 0.29
 -5 -4 -10 0.43 0.26
 5 -4 10 1.26 0.3
 5 -4 10 0.98 0.29
 5 4 10 1.19 0.28
 -5 4 -10 0.39 0.39
 -5 4 -10 1.32 0.31
 -5 4 -10 0.87 0.25
 5 4 10 1 0.23
 6 -4 10 1.03 0.24
 6 -4 10 1.58 0.28
 6 -4 10 1.42 0.33
 6 -4 10 1.3 0.31
 6 -4 10 0.88 0.27
 -6 -4 -10 1.03 0.23
 6 -4 10 1.33 0.31
 6 4 10 1.02 0.23
 6 4 10 1.07 0.28
 -6 4 -10 1.23 0.29
 -6 4 -10 1.23 0.31
 -6 4 -10 1.23 0.24
 7 -4 10 3.58 0.42
 7 -4 10 4.1 0.47
 -7 -4 -10 4.25 0.43
 -7 -4 -10 4.05 1.01
 7 -4 10 4.13 0.49
 7 -4 10 4.13 0.38
 -7 -4 -10 4.07 0.37
 7 4 10 4.87 0.53
 -7 4 -10 3.85 0.39
 -7 4 -10 4.07 0.31
 7 4 10 4.47 0.42
 8 -4 10 3.61 0.36
 -8 -4 -10 3.35 0.34
 8 -4 10 3.49 0.43
 -8 -4 -10 3.46 0.38
 8 -4 10 3.45 0.43
 8 4 10 3.45 0.44
 8 4 10 3.41 0.36
 -8 4 -10 3.77 0.33
 -9 -4 -10 11.44 0.49
 9 -4 10 10.67 0.58
 9 -4 10 11.23 0.49
 9 4 10 11.67 0.63
 9 4 10 10.83 0.48
 9 -5 -10 0.08 0.16
 -9 -5 10 -0.06 0.12
 -9 -5 10 0.02 0.06
 9 -5 -10 -0.07 0.11
 -9 5 10 -0.14 0.12
 -9 5 10 0.15 0.1
 -9 5 10 -0.13 0.1
 -9 5 10 0.09 0.11
 -8 -5 10 1.84 0.26
 8 -5 -10 2.08 0.27
 8 -5 -10 1.65 0.22
 8 -5 -10 1.98 0.34
 8 -5 -10 1.85 0.32
 -8 -5 10 2.2 0.3
 8 -5 -10 2.12 0.42
 -8 5 10 2.18 0.26
 -8 5 10 1.72 0.36
 -8 5 10 2.51 0.31
 -8 5 10 2.14 0.31
 -7 -5 10 14.38 0.74
 7 -5 -10 14.02 0.75
 7 -5 -10 14.23 0.68
 7 -5 -10 13.55 0.53
 7 -5 -10 13.17 0.69
 7 -5 -10 13.26 0.75
 7 -5 -10 15.23 0.66
 -7 -5 10 14.11 0.65
 -7 -5 10 13.87 1.57
 -7 5 10 14.88 0.94
 -7 5 10 13.99 0.68
 -7 5 10 14.68 0.6
 -7 5 10 14.16 0.62
 -7 5 10 15.79 0.71
 -7 5 10 14.38 0.52
 -6 -5 10 17.68 2
 6 -5 -10 19.15 0.9
 -6 -5 10 19.29 0.91
 6 -5 -10 18.95 0.79
 6 -5 -10 17.58 0.63
 -6 -5 10 17.94 0.76
 6 -5 -10 18.53 0.81
 6 -5 -10 18.39 0.94
 6 -5 -10 17.53 0.81
 -6 5 10 18.65 0.68
 -6 5 10 18.54 0.74
 -6 5 10 17.35 0.79
 -6 5 10 19.01 0.77
 -6 5 10 19.37 0.84
 -6 5 10 18.04 0.85
 -6 5 10 19.9 1.12
 5 -5 -10 33.82 1.29
 -5 -5 10 37.72 1.19
 5 -5 -10 38.71 1.25
 -5 -5 10 37.19 3.05
 5 -5 -10 38.11 1.29
 5 -5 -10 38.39 1.45
 5 -5 -10 37.55 1.03
 -5 -5 10 36.48 1.51
 5 -5 -10 36.62 1.26
 -5 5 10 38.21 1.34
 -5 5 10 37.97 1.35
 -5 5 10 35.68 1.23
 -5 5 10 38.15 1.27
 -5 5 10 37.86 1.21
 -5 5 10 38.74 1.27
 -5 5 10 38.64 1.15
 -5 5 10 43.83 1.77
 4 -5 -10 40.31 1.49
 4 -5 -10 39.19 1.32
 -4 -5 10 40.67 1.25
 -4 -5 10 41.08 0.89
 -4 -5 10 38 1.62
 4 -5 -10 40.97 1.3
 4 -5 -10 39.17 1.38
 -4 -5 10 43.04 3.21
 4 -5 -10 42.04 1.1
 4 -5 -10 39.72 1.32
 -4 5 10 40.38 1.22
 -4 5 10 39.58 1.26
 -4 5 10 40.27 1.37
 -4 5 10 41.26 1.33
 -4 5 10 40.26 1.3
 -4 5 10 41.16 1.34
 -4 5 10 40.76 1.39
 3 -5 -10 13.2 0.64
 -3 -5 10 12.59 0.68
 -3 -5 10 13.5 0.47
 3 -5 -10 12.77 0.67
 3 -5 -10 13.75 0.75
 3 -5 -10 13.1 0.62
 3 -5 -10 13.2 0.51
 -3 -5 10 14.01 0.78
 3 -5 -10 13.04 0.65
 -3 5 10 13.59 0.52
 -3 5 10 13.54 0.75
 -3 5 10 14.66 0.74
 -3 5 10 14.47 0.66
 -3 5 10 14.42 0.76
 -3 5 10 14.33 0.69
 -3 5 10 14.04 0.7
 -3 5 10 14 0.68
 3 5 -10 12.62 0.72
 2 -5 -10 13.98 0.52
 -2 -5 10 13.76 0.89
 -2 -5 10 13.92 0.52
 2 -5 -10 14.89 0.68
 -2 -5 10 13.89 0.54
 2 -5 -10 12.83 0.7
 2 -5 -10 14.25 0.66
 -2 -5 10 14.44 0.66
 2 -5 -10 14.42 0.64
 -2 5 10 13.12 0.72
 -2 5 10 14.31 0.6
 -2 5 10 13.95 0.68
 -2 5 10 14.31 0.77
 1 -5 -10 17.2 0.72
 1 -5 -10 16.75 0.72
 -1 -5 10 18.08 0.78
 -1 -5 10 18.31 0.75
 1 -5 -10 16.27 0.57
 -1 -5 10 18.33 0.85
 -1 -5 10 17.45 0.68
 -1 -5 10 17.85 0.69
 1 -5 -10 16.44 0.7
 -1 5 10 17.99 0.77
 -1 5 10 17.64 0.82
 1 5 -10 15.46 0.8
 0 -5 10 70.23 1.85
 0 -5 10 63.68 2.02
 0 -5 -10 68 1.57
 0 -5 -10 63.65 1.88
 0 -5 10 67.85 1.9
 0 5 -10 67.04 2.11
 0 5 -10 68.18 1.94
 0 5 10 68.9 2.07
 1 -5 10 17.2 0.82
 1 -5 10 17.01 0.74
 -1 -5 -10 15.95 0.88
 1 -5 10 16.89 0.6
 1 -5 10 18.57 0.78
 1 -5 10 16.41 0.82
 1 5 10 16.35 0.77
 -1 5 -10 16.58 0.84
 -1 5 -10 17.24 0.76
 1 5 10 17.97 0.79
 2 -5 10 43.57 1.54
 -2 -5 -10 41.45 1.66
 2 -5 10 43.64 1.52
 2 -5 10 43.75 1.36
 2 -5 10 44.42 1.47
 2 -5 10 44.78 1.41
 2 -5 10 41.06 1.43
 2 -5 10 42.92 1.22
 2 5 10 37.18 1.37
 2 5 10 42.75 1.65
 -2 5 -10 40.72 1.48
 -2 5 -10 45.15 1.91
 2 5 10 42.79 1.35
 -2 5 -10 45.15 1.43
 3 -5 10 3.92 0.28
 3 -5 10 3.22 0.43
 3 -5 10 3.31 0.37
 3 -5 10 2.97 0.41
 3 -5 10 2.97 0.35
 3 -5 10 3.48 0.41
 3 -5 10 3.91 0.37
 3 -5 10 3.57 0.43
 -3 5 -10 3.96 0.4
 -3 5 -10 3.11 0.43
 3 5 10 3.21 0.42
 3 5 10 3.01 0.4
 -3 5 -10 3.54 0.49
 -3 5 -10 3.22 0.38
 3 5 10 2.77 0.43
 3 5 10 3.25 0.34
 4 -5 10 1.86 0.35
 4 -5 10 1.42 0.3
 4 -5 10 2.86 0.42
 4 -5 10 2.34 0.34
 4 -5 10 2.15 0.35
 4 -5 10 2.17 0.26
 4 -5 10 1.86 0.32
 4 5 10 2.18 0.31
 4 5 10 2.03 0.34
 4 5 10 2.41 0.34
 -4 5 -10 1.88 0.33
 -4 5 -10 1.68 0.32
 4 5 10 2 0.39
 -4 5 -10 1.39 0.36
 -4 5 -10 1.92 0.35
 5 -5 10 3.73 0.4
 5 -5 10 3.58 0.43
 5 -5 10 4.16 0.33
 -5 -5 -10 4.09 1.07
 -5 -5 -10 4.07 0.4
 5 -5 10 4.12 0.48
 5 -5 10 4.67 0.45
 5 -5 10 4.36 0.42
 5 -5 10 3.42 0.46
 5 5 10 4.18 0.38
 5 5 10 3.27 0.45
 -5 5 -10 4.4 0.42
 -5 5 -10 3.92 0.42
 6 -5 10 17.58 0.78
 -6 -5 -10 18.28 0.75
 6 -5 10 16.1 0.9
 6 -5 10 18.26 0.89
 6 -5 10 16.95 0.79
 6 -5 10 17.35 0.76
 6 -5 10 18.3 0.88
 6 -5 10 17.61 0.67
 -6 -5 -10 17.6 1.86
 -6 5 -10 18.21 0.84
 6 5 10 18.31 0.76
 -6 5 -10 18.19 0.81
 6 5 10 17.16 0.96
 -6 5 -10 17.18 0.68
 -7 -5 -10 3.35 0.88
 7 -5 10 3.95 0.42
 -7 -5 -10 4.85 0.43
 7 -5 10 3.11 0.42
 -7 -5 -10 4.09 0.37
 7 -5 10 3.43 0.32
 -7 5 -10 4.12 0.26
 7 5 10 3.93 0.35
 -7 5 -10 3.78 0.37
 7 5 10 4.32 0.45
 8 -5 10 1.43 0.26
 -8 -5 -10 0.97 0.21
 8 -5 10 1.12 0.27
 8 -5 10 1.28 0.19
 8 5 10 1.48 0.22
 8 5 10 0.94 0.2
 -8 5 -10 1.13 0.17
 8 5 10 1.22 0.21
 -9 -5 -10 0.12 0.1
 9 -5 10 0.23 0.1
 9 -5 10 0.16 0.15
 9 5 10 -0.07 0.12
 9 5 10 -0.06 0.15
 -8 -6 10 12.82 0.63
 8 -6 -10 12.79 0.52
 8 -6 -10 13.65 0.72
 -8 -6 10 12.69 0.51
 8 -6 -10 12.2 0.65
 -8 6 10 12.71 0.51
 -8 6 10 13.03 0.54
 -8 6 10 13.41 0.53
 7 -6 -10 15.27 0.53
 7 -6 -10 17 0.77
 7 -6 -10 15.76 0.88
 -7 -6 10 14.4 1.51
 -7 -6 10 15.86 0.78
 7 -6 -10 15.94 0.64
 -7 -6 10 14.68 0.63
 -7 6 10 16.51 0.62
 -7 6 10 16.11 0.67
 -7 6 10 16.51 0.53
 -7 6 10 16.48 0.68
 -7 6 10 16.75 0.66
 6 -6 -10 37.85 1.38
 -6 -6 10 40.27 2.98
 -6 -6 10 39.63 1.59
 6 -6 -10 38.43 1.26
 6 -6 -10 39.88 1.71
 6 -6 -10 39.73 1.04
 6 -6 -10 36.84 1.36
 -6 -6 10 42.67 1.22
 6 -6 -10 36.47 1.27
 6 -6 -10 40.45 1.27
 -6 6 10 40.54 1.24
 -6 6 10 38.85 1.12
 -6 6 10 40.55 1.26
 -6 6 10 42.45 1.27
 -6 6 10 42.54 1.28
 5 -6 -10 4.47 0.47
 -5 -6 10 5.32 0.43
 5 -6 -10 5.22 0.57
 5 -6 -10 4.62 0.46
 -5 -6 10 3.87 1.17
 5 -6 -10 5.41 0.53
 5 -6 -10 4.94 0.38
 5 -6 -10 4.52 0.42
 5 -6 -10 4.9 0.32
 5 -6 -10 4.23 0.43
 -5 -6 10 4.13 0.44
 -5 6 10 5.25 0.41
 -5 6 10 4.82 0.44
 -5 6 10 5.43 0.47
 -5 6 10 5.26 0.45
 -4 -6 10 10.49 0.71
 4 -6 -10 9.98 0.6
 4 -6 -10 10.47 0.55
 -4 -6 10 10.39 1.6
 -4 -6 10 10.63 0.58
 4 -6 -10 11.66 0.63
 4 -6 -10 10.85 0.7
 4 -6 -10 11.15 0.69
 4 -6 -10 11.72 0.9
 -4 -6 10 11.08 0.28
 4 -6 -10 11.06 0.47
 -4 6 10 10.82 0.63
 -4 6 10 10.67 0.59
 -4 6 10 11.44 0.68
 -4 6 10 11.03 0.62
 -3 -6 10 2.75 0.23
 3 -6 -10 3.59 0.38
 3 -6 -10 3.19 0.37
 -3 -6 10 2.75 0.4
 3 -6 -10 2.73 0.32
 3 -6 -10 3.72 0.28
 3 -6 -10 2.95 0.57
 3 -6 -10 2.93 0.4
 -3 -6 10 2.82 0.35
 -3 6 10 3.04 0.28
 -3 6 10 3.06 0.41
 -3 6 10 3.16 0.39
 -3 6 10 4.09 0.55
 -3 6 10 2.49 0.36
 -3 6 10 3.09 0.45
 2 -6 -10 5.78 0.45
 2 -6 -10 5.6 0.47
 -2 -6 10 5.5 0.35
 -2 -6 10 5.52 0.31
 2 -6 -10 5.74 0.52
 -2 -6 10 4.82 0.43
 2 -6 -10 5.49 0.33
 -2 -6 10 6.09 0.56
 2 -6 -10 5.7 0.56
 2 -6 -10 6.27 0.41
 -2 6 10 5.5 0.55
 -2 6 10 5.91 0.46
 -2 6 10 5.56 0.49
 -2 6 10 5.96 0.4
 -1 -6 10 43.4 1.82
 -1 -6 10 42.93 1.34
 -1 -6 10 41.63 1.3
 -1 -6 10 42.46 1.38
 -1 -6 10 39.48 1.05
 -1 -6 10 42.46 1.49
 1 -6 -10 41.21 1.75
 -1 -6 10 41.01 1.25
 -1 -6 10 42.22 1.19
 1 -6 -10 42.5 1.3
 1 -6 -10 41.3 1.36
 1 -6 -10 41.22 1.31
 1 6 -10 43.77 1.37
 -1 6 10 42.44 1.37
 -1 6 10 43.88 1.29
 -1 6 10 42.28 1.13
 -1 6 10 42.03 1.36
 0 6 10 1.98 0.34
 0 6 10 1.65 0.25
 0 6 -10 2.68 0.37
 0 6 10 1.96 0.32
 0 6 10 3.08 0.38
 1 -6 10 22.09 0.92
 -1 -6 -10 22.57 1
 1 -6 10 22.06 0.68
 1 -6 10 22.85 0.91
 1 -6 10 23.09 1.02
 1 -6 10 23.63 0.96
 1 -6 10 22.7 0.83
 1 -6 10 22.68 0.85
 -1 6 -10 23.63 0.97
 -1 6 -10 22.83 0.98
 1 6 10 22.54 0.92
 -1 6 -10 22.16 0.93
 1 6 10 23.74 0.97
 -1 6 -10 24.44 1.3
 1 6 10 24.31 0.85
 1 6 10 22.87 0.94
 2 -6 10 15.41 0.61
 2 -6 10 15.8 0.74
 2 -6 10 16.24 0.75
 2 -6 10 15.62 0.84
 2 -6 10 16.36 0.73
 2 -6 10 17.07 0.79
 2 -6 10 15.47 0.78
 2 -6 10 16.33 0.85
 2 6 10 16.97 0.73
 -2 6 -10 16.89 1.02
 2 6 10 16.26 0.77
 2 6 10 16.29 0.76
 -2 6 -10 16.31 0.78
 -2 6 -10 16.4 0.79
 3 -6 10 37.59 1.25
 3 -6 10 38.53 1.39
 3 -6 10 39.11 1.44
 3 -6 10 37.14 1.45
 -3 -6 -10 38.73 3.08
 3 -6 10 39.15 1.28
 3 -6 10 37.64 1.32
 3 -6 10 37.12 1.13
 3 6 10 40.58 1.25
 -3 6 -10 40.61 1.77
 -3 6 -10 39.67 1.36
 3 6 10 40.37 1.28
 -3 6 -10 41.67 1.44
 3 6 10 43.18 1.34
 3 6 10 41.19 1.67
 3 6 10 39.26 1.32
 4 -6 10 7.94 0.61
 4 -6 10 7.27 0.47
 4 -6 10 7.2 0.52
 4 -6 10 7.32 0.52
 4 -6 10 7.06 0.58
 -4 -6 -10 8.6 0.35
 4 -6 10 8.49 0.58
 4 -6 10 7.55 0.58
 -4 -6 -10 6.61 1.3
 4 -6 10 7.63 0.35
 4 6 10 8.5 0.47
 -4 6 -10 8.08 0.56
 4 6 10 8.51 0.54
 4 6 10 8.46 0.59
 -4 6 -10 9.29 0.6
 -4 6 -10 10.54 0.66
 4 6 10 7.85 0.54
 4 6 10 8.96 0.57
 -4 6 -10 10.28 0.84
 5 -6 10 25.43 0.74
 5 -6 10 25.08 1.01
 5 -6 10 25.05 0.95
 5 -6 10 25.32 1.06
 5 -6 10 23.17 0.96
 -5 -6 -10 22.95 2.18
 5 -6 10 25.89 0.9
 5 -6 10 24.06 1.03
 5 6 10 25.26 0.97
 5 6 10 26.07 0.96
 -5 6 -10 26.16 0.91
 5 6 10 27.17 1.18
 5 6 10 26.01 0.9
 6 -6 10 1.94 0.33
 6 -6 10 2.47 0.24
 6 -6 10 2.73 0.4
 -6 -6 -10 2.75 0.39
 6 -6 10 2.59 0.34
 6 -6 10 2.94 0.35
 -6 -6 -10 2.18 0.75
 -6 6 -10 2.66 0.27
 6 6 10 2.5 0.34
 6 6 10 2.57 0.4
 6 6 10 2.47 0.28
 -6 6 -10 3.56 0.4
 6 6 10 3 0.34
 7 -6 10 6.97 0.42
 -7 -6 -10 6.31 0.41
 7 -6 10 6.22 0.29
 7 -6 10 6.1 0.47
 -7 -6 -10 5.76 0.92
 7 6 10 6.69 0.44
 7 6 10 6.36 0.41
 7 6 10 6.71 0.42
 7 6 10 6.28 0.32
 -7 6 -10 6.75 0.39
 8 -6 10 0.31 0.15
 -8 -6 -10 0.33 0.12
 8 6 10 0.44 0.15
 8 6 10 0.55 0.16
 8 6 10 0.19 0.13
 7 -7 -10 4.32 0.36
 7 -7 -10 4.27 0.27
 -7 -7 10 3.53 0.71
 -7 -7 10 4.19 0.28
 -7 -7 10 4.54 0.35
 -7 7 10 4.4 0.2
 -7 7 10 4.23 0.27
 -7 7 10 4.52 0.31
 -7 7 10 4.3 0.29
 6 -7 -10 35.02 1.43
 6 -7 -10 35.24 1.21
 -6 -7 10 35.25 2.54
 -6 -7 10 36.72 1.04
 -6 -7 10 35.54 1.43
 -6 7 10 37.49 1.12
 -6 7 10 38.03 1.12
 -6 7 10 38.02 1.11
 -6 7 10 36.72 1
 -5 -7 10 3.29 0.34
 5 -7 -10 2.73 0.36
 5 -7 -10 2.85 0.41
 -5 -7 10 2.54 0.84
 5 -7 -10 2.82 0.37
 -5 -7 10 2.99 0.37
 -5 7 10 3.86 0.42
 -5 7 10 3.26 0.36
 -5 7 10 3.35 0.34
 -5 7 10 3.22 0.35
 4 -7 -10 0.55 0.2
 4 -7 -10 0.4 0.23
 -4 -7 10 0.92 0.21
 -4 -7 10 0.54 0.11
 -4 -7 10 0.3 0.15
 4 -7 -10 0.37 0.22
 -4 -7 10 0.03 0.17
 4 -7 -10 0.39 0.19
 -4 7 10 0.47 0.2
 -4 7 10 0.58 0.21
 -4 7 10 0.56 0.25
 -4 7 10 0.61 0.23
 3 -7 -10 22.37 0.94
 -3 -7 10 24.22 0.67
 3 -7 -10 24.68 1.03
 3 -7 -10 24.66 1.14
 -3 -7 10 24.76 1.22
 -3 -7 10 26.77 2.36
 3 -7 -10 22.19 0.9
 -3 -7 10 24.44 0.89
 3 7 -10 26.94 0.99
 -3 7 10 26.76 0.76
 -3 7 10 26.94 0.99
 -3 7 10 27.13 1.01
 -3 7 10 26.33 1
 2 -7 -10 12.03 0.66
 2 -7 -10 12.6 0.73
 -2 -7 10 12.71 0.63
 -2 -7 10 13.09 0.51
 2 -7 -10 13.25 0.67
 2 -7 -10 12.14 0.63
 -2 -7 10 12.33 0.81
 2 -7 -10 11.65 0.7
 -2 7 10 13.27 0.67
 2 7 -10 12.98 0.66
 -2 7 10 13.67 0.57
 -2 7 10 12.55 0.8
 -2 7 10 13.31 0.69
 -1 -7 10 10.41 0.49
 1 -7 -10 9.78 0.56
 1 -7 -10 10.02 0.6
 -1 -7 10 10.51 0.48
 1 7 -10 11.73 0.86
 1 7 -10 10.85 0.6
 -1 7 10 9.94 0.55
 -1 7 10 10.61 0.62
 -1 7 10 10.76 0.39
 -1 7 10 11.03 0.64
 1 7 -10 10.38 0.65
 0 -7 10 1.54 0.23
 0 -7 -10 1.25 0.24
 0 -7 10 1.7 0.28
 0 -7 10 1.08 0.22
 0 -7 10 1.24 0.29
 0 -7 10 1.1 0.26
 0 -7 10 1.29 0.3
 0 7 -10 0.8 0.24
 0 7 10 1.05 0.28
 0 7 10 1.66 0.33
 0 7 10 1.21 0.2
 0 7 -10 1.22 0.32
 0 7 -10 1.03 0.25
 0 7 10 1.08 0.27
 -1 7 -10 0.29 0.21
 1 7 10 0.61 0.24
 1 7 10 0.36 0.22
 -1 7 -10 0.45 0.19
 1 7 10 0.15 0.17
 1 7 10 -0.02 0.19
 -1 7 -10 0.36 0.21
 2 -7 10 3.29 0.34
 2 -7 10 3.05 0.4
 2 -7 10 3.46 0.39
 2 -7 10 2.75 0.23
 -2 -7 -10 3.01 0.3
 2 -7 10 2.51 0.39
 2 -7 10 2.76 0.4
 2 -7 10 3.05 0.39
 2 7 10 2.84 0.38
 2 7 10 2.81 0.41
 -2 7 -10 2.9 0.45
 -2 7 -10 2.3 0.35
 2 7 10 3.45 0.41
 2 7 10 2.27 0.3
 -2 7 -10 2.07 0.32
 3 -7 10 20.19 0.79
 3 -7 10 20.67 0.91
 3 -7 10 19.59 0.66
 -3 -7 -10 20.18 2.02
 3 -7 10 18.54 0.85
 3 -7 10 19.7 0.93
 -3 -7 -10 20.63 0.57
 3 -7 10 19.55 0.83
 -3 7 -10 19.72 0.83
 -3 7 -10 21.8 1.11
 3 7 10 19.56 0.84
 3 7 10 20.65 0.85
 -3 7 -10 23.02 0.87
 3 7 10 20.36 0.78
 -3 7 -10 20.68 0.85
 4 -7 10 29.86 0.89
 4 -7 10 28.97 1.04
 4 -7 10 29.59 1.15
 4 -7 10 31.11 1.03
 -4 -7 -10 29.69 2.42
 4 -7 10 28.16 1.14
 4 -7 10 30.22 1.16
 -4 7 -10 30.56 1.16
 4 7 10 33.74 1.06
 4 7 10 32.13 1.08
 -4 7 -10 32.59 1.04
 4 7 10 32.59 1.09
 5 -7 10 0.76 0.25
 5 -7 10 0.82 0.18
 5 -7 10 0.48 0.21
 5 -7 10 0.9 0.28
 5 -7 10 0.35 0.19
 -5 7 -10 0.19 0.21
 5 7 10 0.35 0.18
 5 7 10 0.7 0.23
 5 7 10 0.62 0.2
 -5 7 -10 0.66 0.18
 6 -7 10 5.71 0.44
 6 -7 10 6.36 0.43
 6 -7 10 5.73 0.33
 -6 -7 -10 6.46 0.41
 -6 -7 -10 5.82 0.86
 6 7 10 6.49 0.4
 6 7 10 6.73 0.4
 -6 7 -10 6.95 0.41
 6 7 10 5.82 0.39
 7 -7 10 0.87 0.14
 7 7 10 0.4 0.15
 -7 7 -10 0.63 0.12
 5 -8 -10 2.48 0.27
 5 8 -10 2.39 0.26
 -5 8 10 2.09 0.24
 -5 8 10 1.92 0.28
 5 8 -10 1.7 0.31
 -5 8 10 1.64 0.24
 -5 8 10 1.57 0.22
 5 8 -10 1.9 0.25
 -4 -8 10 -0.16 0.13
 4 -8 -10 0.39 0.17
 4 -8 -10 0.12 0.17
 -4 8 10 0.55 0.23
 4 8 -10 0.39 0.16
 4 8 -10 0.25 0.16
 4 8 -10 0.43 0.16
 -4 8 10 0.22 0.14
 -4 8 10 0.31 0.16
 -4 8 10 0.23 0.14
 -3 -8 10 0.02 0.1
 -3 -8 10 -0.1 0.17
 3 -8 -10 0.15 0.16
 3 -8 -10 -0.07 0.17
 3 8 -10 -0.09 0.15
 3 8 -10 -0.18 0.13
 -3 8 10 0.12 0.15
 -3 8 10 0.19 0.19
 3 8 -10 -0.03 0.15
 -3 8 10 -0.06 0.15
 -2 -8 10 5.7 1.04
 -2 -8 10 4.47 0.26
 -2 -8 10 4.47 0.32
 2 -8 -10 4.3 0.35
 2 8 -10 3.88 0.38
 -2 8 10 4.87 0.28
 2 8 -10 4.3 0.49
 -2 8 10 4.68 0.4
 -2 8 10 4.46 0.38
 2 8 -10 5.15 0.41
 1 -8 -10 8.05 0.42
 -1 -8 10 6.86 0.44
 -1 -8 10 7.52 0.38
 1 8 -10 8.55 0.5
 -1 8 10 7.9 0.65
 -1 8 10 7.96 0.49
 -1 8 10 7.51 0.51
 1 8 -10 7.16 0.47
 1 8 -10 7.24 0.61
 -1 8 10 7.71 0.42
 0 -8 10 -0.15 0.15
 0 -8 -10 0.15 0.14
 0 -8 10 -0.13 0.12
 0 -8 10 0.02 0.13
 0 8 10 0.29 0.19
 0 8 -10 0.1 0.14
 0 8 10 0.09 0.16
 0 8 -10 0.11 0.16
 0 8 -10 -0.09 0.17
 0 8 10 0.24 0.18
 1 -8 10 0.35 0.18
 1 -8 10 0.43 0.19
 1 -8 10 0.43 0.22
 1 -8 10 0.56 0.23
 1 -8 10 0.55 0.12
 -1 -8 -10 0.6 0.14
 -1 8 -10 0.64 0.18
 1 8 10 0.96 0.24
 1 8 10 0.85 0.15
 -1 8 -10 0.65 0.22
 1 8 10 0.77 0.23
 -1 8 -10 0.6 0.2
 1 8 10 0.96 0.24
 2 -8 10 0.46 0.19
 2 -8 10 0.45 0.21
 2 -8 10 0.59 0.22
 2 8 10 0.51 0.2
 -2 8 -10 2.23 0.44
 2 8 10 0.36 0.21
 2 8 10 0.32 0.19
 -2 8 -10 0.67 0.21
 -2 8 -10 0.36 0.19
 2 8 10 0.5 0.16
 3 -8 10 0.84 0.18
 3 -8 10 0.93 0.24
 -3 -8 -10 0.43 0.24
 3 -8 10 0.89 0.22
 -3 -8 -10 0.64 0.14
 3 -8 10 0.81 0.24
 -3 8 -10 0.82 0.22
 3 8 10 0.79 0.21
 3 8 10 1.51 0.22
 -3 8 -10 0.72 0.19
 3 8 10 0.96 0.22
 3 8 10 0.92 0.23
 4 -8 10 0.49 0.15
 4 -8 10 0.23 0.18
 -4 -8 -10 0.05 0.15
 4 -8 10 0.37 0.19
 4 8 10 0.61 0.21
 4 8 10 0.12 0.16
 -4 8 -10 0.44 0.2
 4 8 10 0.56 0.15
 -4 8 -10 0.44 0.14
 4 8 10 0.37 0.15
 -5 -8 -10 1.71 0.23
 5 -8 10 1.14 0.22
 5 -8 10 1.41 0.22
 5 8 10 1.41 0.19
 5 8 10 1.63 0.22
 5 8 10 1.54 0.22
 -5 8 -10 1.17 0.19
 2 -9 -10 0.44 0.09
 2 -9 -10 0.3 0.16
 2 9 -10 0.25 0.1
 2 9 -10 0.11 0.11
 -1 -9 10 9 0.27
 -1 -9 10 8.82 0.36
 1 -9 -10 8.5 0.4
 -1 9 10 9.11 0.43
 1 9 -10 9.37 0.52
 1 9 -10 9.7 0.41
 -1 9 10 8.96 0.42
 0 -9 10 3.22 0.26
 0 -9 -10 3.14 0.26
 0 -9 10 3.44 0.21
 0 9 10 3.55 0.22
 0 9 -10 3.78 0.34
 0 9 10 3.85 0.29
 0 9 -10 3.38 0.26
 0 9 10 3.77 0.31
 1 -9 10 1.72 0.24
 -1 -9 -10 2.13 0.19
 1 -9 10 1.74 0.19
 1 9 10 2.34 0.22
 -1 9 -10 2.31 0.26
 1 9 10 2.05 0.24
 1 9 10 2.25 0.26
 -11 0 11 0.02 0.05
 -11 0 11 -0.02 0.12
 -11 0 11 -0.14 0.1
 -10 0 11 0.07 0.08
 -10 0 11 -0.03 0.16
 -10 0 11 0.05 0.15
 -9 0 11 0.06 0.09
 -9 0 11 -0.06 0.18
 -9 0 11 0.08 0.05
 -9 0 11 0.28 0.19
 -8 0 11 -0.02 0.06
 -8 0 11 0.23 0.22
 -8 0 11 -0.26 0.23
 -8 0 11 0.01 0.19
 -7 0 11 0.24 0.21
 -7 0 11 -0.05 0.07
 -7 0 11 -0.02 0.21
 -7 0 11 0.04 0.22
 -6 0 11 0.08 0.17
 -6 0 11 -0.05 0.17
 6 0 -11 0.01 0.06
 -5 0 11 0.02 0.13
 5 0 -11 0.17 0.06
 -5 0 11 -0.19 0.18
 -5 0 11 0.1 0.17
 4 0 -11 -0.01 0.04
 -4 0 11 0.1 0.14
 -4 0 11 0.03 0.13
 -3 0 11 -0.07 0.11
 -3 0 11 -0.05 0.1
 3 0 -11 0 0.04
 2 0 -11 0.03 0.06
 -2 0 11 0 0.11
 -2 0 11 -0.09 0.09
 -1 0 11 0.16 0.12
 1 0 -11 0.11 0.07
 -1 0 11 0.44 0.14
 0 0 -11 0.07 0.08
 0 0 11 0.01 0.1
 0 0 11 -0.04 0.1
 1 0 11 0.05 0.11
 1 0 11 -0.02 0.1
 -1 0 -11 -0.02 0.08
 2 0 11 0.15 0.11
 2 0 11 -0.02 0.1
 -2 0 -11 -0.06 0.09
 3 0 11 0.22 0.15
 3 0 11 0.02 0.1
 4 0 11 0.14 0.12
 4 0 11 0 0.13
 5 0 11 0.27 0.17
 -6 0 -11 0.15 0.23
 6 0 11 -0.1 0.14
 6 0 11 -0.08 0.17
 -6 0 -11 -0.06 0.17
 6 0 11 0.2 0.19
 -7 0 -11 -0.03 0.13
 -7 0 -11 0 0.17
 7 0 11 0.13 0.19
 7 0 11 0.12 0.2
 7 0 11 -0.15 0.15
 8 0 11 0.08 0.17
 -8 0 -11 -0.09 0.14
 8 0 11 -0.12 0.19
 8 0 11 -0.07 0.14
 9 0 11 -0.08 0.14
 -9 0 -11 0.08 0.2
 9 0 11 0.03 0.13
 9 0 11 -0.12 0.19
 10 0 11 0.12 0.18
 10 0 11 0.03 0.11
 -10 0 -11 0.01 0.15
 10 0 11 -0.05 0.09
 10 0 11 0.17 0.18
 -11 -1 11 0.11 0.11
 -11 1 11 -0.08 0.11
 -11 1 11 -0.03 0.05
 -11 1 11 0.08 0.11
 -10 -1 11 2.64 0.25
 -10 -1 11 3.16 0.33
 -10 -1 11 3.37 0.33
 -10 1 11 3.66 0.35
 -10 1 11 3.19 0.32
 -10 1 11 3.23 0.33
 -9 -1 11 26.23 0.96
 -9 -1 11 28.81 0.97
 -9 1 11 27.96 1.2
 -9 1 11 27.7 0.99
 -9 1 11 28.98 0.76
 -9 1 11 28.78 1.02
 -8 -1 11 0.38 0.21
 -8 -1 11 0.2 0.21
 -8 1 11 0.29 0.14
 -8 1 11 0.5 0.23
 -8 1 11 0.56 0.23
 -8 1 11 0.45 0.11
 -8 1 11 0.35 0.22
 7 -1 -11 1.82 0.21
 7 -1 -11 1.88 0.35
 -7 1 11 1.75 0.34
 -7 1 11 1.23 0.28
 -7 1 11 1.32 0.17
 -7 1 11 1.49 0.28
 -7 1 11 1.43 0.26
 6 -1 -11 14.81 0.53
 6 -1 -11 14.87 0.58
 -6 1 11 15.28 0.77
 -6 1 11 13.67 0.73
 -6 1 11 14.52 0.77
 5 -1 -11 27.9 0.88
 -5 -1 11 28.51 1.07
 -5 1 11 28.41 1.08
 -5 1 11 28.74 1.11
 -5 1 11 27.56 1.09
 -4 -1 11 19.61 0.77
 -4 -1 11 18.72 0.78
 4 -1 -11 19.16 0.63
 -4 1 11 18.22 0.79
 -4 1 11 20.4 0.85
 -3 -1 11 6.48 0.4
 3 -1 -11 6.28 0.3
 -3 -1 11 6.61 0.41
 -3 1 11 7.02 0.43
 -3 1 11 6.51 0.42
 2 -1 -11 9.92 0.4
 -2 -1 11 9.06 0.47
 -2 -1 11 10.87 0.52
 -2 1 11 10.12 0.51
 -2 1 11 9.61 0.49
 -2 1 11 10.85 0.51
 -1 -1 11 124.27 3.07
 1 -1 -11 123.14 3.19
 -1 -1 11 118.54 3.23
 -1 1 11 130.96 3.26
 -1 1 11 127.02 3.2
 1 1 -11 127.98 3.29
 -1 1 11 124.24 3.36
 0 -1 11 137.28 3.09
 0 -1 11 137.25 3.38
 0 -1 -11 134.26 3.54
 0 -1 11 132.69 3.56
 0 1 11 133.45 3.58
 0 1 -11 140.4 3.59
 0 1 11 138.57 3.41
 -1 -1 -11 2.94 0.25
 1 -1 11 2.45 0.26
 1 -1 11 2.86 0.24
 1 -1 11 2.88 0.28
 1 1 11 2.85 0.26
 -1 1 -11 2.81 0.25
 1 1 11 3.04 0.27
 2 -1 11 4.3 0.34
 -2 -1 -11 3.92 0.31
 2 -1 11 3.85 0.34
 2 -1 11 4.05 0.28
 -2 1 -11 4.05 0.31
 2 1 11 4.2 0.34
 2 1 11 4.11 0.32
 3 -1 11 8.54 0.5
 3 -1 11 8.46 0.49
 3 -1 11 7.68 0.4
 3 1 11 7.81 0.45
 3 1 11 8.09 0.45
 4 -1 11 65.98 1.99
 4 -1 11 64.77 1.91
 -4 1 -11 64.9 1.78
 5 -1 11 6.36 0.47
 5 -1 11 5.08 0.44
 5 -1 11 5.85 0.48
 6 -1 11 24.59 1.19
 6 -1 11 24.13 1.03
 6 -1 11 25.26 1.04
 -6 -1 -11 24.89 0.83
 6 -1 11 24.72 1.02
 -6 -1 -11 24.68 0.91
 6 -1 11 24.67 0.91
 6 1 11 25.47 1.04
 -6 1 -11 24.25 0.87
 6 1 11 24.73 0.95
 -6 1 -11 24.68 0.96
 6 1 11 25.95 1.25
 7 -1 11 19.63 0.93
 -7 -1 -11 21.48 0.79
 7 -1 11 19.57 0.81
 7 -1 11 18.8 0.89
 7 -1 11 20.67 1.06
 7 1 11 20.85 1.11
 -7 1 -11 21.55 0.84
 7 1 11 19.59 0.84
 -7 1 -11 20.29 0.7
 7 1 11 20.8 0.95
 8 -1 11 11.05 0.58
 8 -1 11 11.26 0.67
 8 -1 11 12.22 0.76
 -8 -1 -11 11.04 0.5
 8 -1 11 11.73 0.71
 -8 1 -11 10.64 0.52
 8 1 11 11.68 0.69
 8 1 11 11.66 0.61
 8 1 11 11.31 0.77
 9 -1 11 0.8 0.25
 9 -1 11 0.51 0.16
 -9 -1 -11 0.64 0.22
 9 -1 11 0.31 0.17
 9 -1 11 0.17 0.23
 9 1 11 0.45 0.17
 -9 1 -11 0.52 0.11
 9 1 11 0.41 0.19
 -9 1 -11 0.38 0.22
 9 1 11 0.57 0.24
 10 -1 11 6.77 0.44
 10 -1 11 6.43 0.46
 -10 -1 -11 7.1 0.4
 10 1 11 6.57 0.33
 -10 1 -11 7.34 0.43
 10 1 11 6.39 0.44
 10 1 11 6.49 0.43
 -10 -2 11 0.4 0.09
 -10 2 11 0.31 0.12
 -10 2 11 0.59 0.18
 -10 2 11 0.51 0.09
 -10 2 11 0.65 0.19
 9 -2 -11 14.21 0.78
 -9 -2 11 15.32 0.69
 -9 2 11 16.34 0.72
 -9 2 11 16.45 0.73
 -9 2 11 16.2 0.84
 -9 2 11 16.65 0.54
 8 -2 -11 5.16 0.54
 -8 2 11 4.59 0.3
 -8 2 11 4.29 0.42
 -8 2 11 5.13 0.46
 -8 2 11 4.81 0.48
 -8 2 11 4.45 0.43
 7 -2 -11 68.93 2.18
 7 -2 -11 65.12 1.89
 7 -2 -11 64.7 1.88
 -7 2 11 60.97 2.32
 -7 2 11 64.93 1.96
 -7 2 11 65.79 1.78
 -7 2 11 66.28 1.81
 -7 2 11 61.83 1.56
 6 -2 -11 42.71 1.41
 6 -2 -11 48.12 1.42
 6 -2 -11 46.26 1.36
 -6 2 11 43.78 1.13
 -6 2 11 45.88 1.19
 -6 2 11 47.51 1.63
 -6 2 11 44.68 0.97
 -6 2 11 46.48 1.53
 -6 2 11 44.95 1.37
 -6 2 11 44.71 1.38
 -6 2 11 42.29 1.71
 5 -2 -11 0.09 0.1
 5 -2 -11 0.18 0.11
 -5 2 11 0.17 0.19
 -5 2 11 0.75 0.23
 -5 2 11 0.04 0.15
 4 -2 -11 16.2 0.63
 4 -2 -11 16.56 0.59
 -4 2 11 16.55 0.75
 -4 2 11 16.53 0.78
 -4 2 11 16.29 0.77
 -4 2 11 16.92 0.76
 -3 -2 11 61.31 1.78
 3 -2 -11 57.68 1.7
 -3 2 11 59.2 1.76
 -3 2 11 61.98 1.87
 -3 2 11 59.74 1.78
 -2 -2 11 36.35 1.19
 -2 -2 11 36.48 1.14
 2 -2 -11 35.41 1.12
 -2 2 11 37.35 1.2
 -2 2 11 34.86 1.21
 -2 2 11 37.61 1.19
 -1 -2 11 80.86 2
 1 -2 -11 82.44 2.24
 -1 -2 11 80.99 2.28
 -1 -2 11 78.43 2.15
 -1 2 11 83.55 2.25
 -1 2 11 85.49 2.3
 -1 2 11 84.64 2.36
 0 -2 -11 2.8 0.25
 0 -2 11 2.43 0.27
 0 -2 11 2.09 0.25
 0 -2 11 2.18 0.24
 0 2 11 2.45 0.25
 0 2 11 2.27 0.25
 0 2 11 2.65 0.25
 0 2 -11 2.72 0.23
 1 -2 11 0.32 0.13
 1 -2 11 0.27 0.11
 1 -2 11 0.32 0.16
 1 -2 11 1.24 0.22
 -1 -2 -11 0.43 0.14
 1 2 11 0.47 0.16
 1 2 11 0.59 0.16
 1 2 11 0.09 0.1
 -1 2 -11 0.49 0.15
 2 -2 11 32.39 1
 2 -2 11 33.76 1.05
 2 -2 11 34.95 1.19
 2 -2 11 32.72 1.13
 -2 2 -11 35.09 1.2
 3 -2 11 29.4 0.94
 3 -2 11 30.25 1.12
 3 -2 11 30.37 1.07
 3 -2 11 28.36 0.96
 -3 2 -11 31.12 1.04
 4 -2 11 2.92 0.35
 4 -2 11 3.68 0.31
 4 -2 11 3.43 0.36
 4 -2 11 2.92 0.28
 -4 2 -11 3.12 0.31
 5 -2 11 12.81 0.71
 5 -2 11 13.7 0.71
 5 -2 11 14.45 0.76
 -5 2 -11 13.75 0.66
 5 2 11 13.22 0.71
 6 -2 11 3.88 0.45
 6 -2 11 4.29 0.43
 -6 -2 -11 3.82 0.4
 6 -2 11 3.14 0.43
 6 -2 11 4.54 0.37
 6 -2 11 4.63 0.49
 6 -2 11 4.48 0.45
 -6 2 -11 4.26 0.44
 -6 2 -11 3.88 0.37
 6 2 11 4.37 0.52
 6 2 11 3.86 0.45
 6 2 11 4.63 0.4
 7 -2 11 19.47 0.95
 7 -2 11 18.8 0.9
 7 -2 11 19.86 0.92
 7 -2 11 18.78 0.97
 -7 -2 -11 17.69 0.71
 7 -2 11 17.84 0.8
 7 -2 11 18.9 0.75
 -7 2 -11 17.97 0.78
 7 2 11 18.97 1.05
 7 2 11 17.64 0.79
 -7 2 -11 18.05 0.67
 8 -2 11 6.54 0.41
 8 -2 11 6.62 0.51
 8 -2 11 7.02 0.53
 -8 -2 -11 6.52 0.51
 8 -2 11 7 0.56
 8 -2 11 5.82 0.55
 8 2 11 6.35 0.58
 8 2 11 6.59 0.46
 -8 2 -11 5.9 0.41
 9 -2 11 23.09 0.86
 -9 -2 -11 23.86 0.86
 9 -2 11 24.3 0.98
 9 2 11 24.74 0.88
 9 2 11 25.38 1.15
 -9 2 -11 24.82 0.66
 -10 -2 -11 13.2 0.5
 10 -2 11 11.63 0.58
 10 -2 11 12.8 0.52
 10 2 11 12.15 0.57
 10 2 11 12 0.44
 10 2 11 12.48 0.56
 -10 2 -11 13.91 0.56
 10 -3 -11 10.28 0.48
 -10 3 11 10.53 0.6
 -10 3 11 10.59 0.37
 -10 3 11 12.2 0.51
 -10 3 11 11.65 0.52
 9 -3 -11 2.79 0.26
 -9 -3 11 2.72 0.33
 -9 -3 11 3.03 0.26
 9 -3 -11 2.33 0.36
 -9 3 11 3.17 0.35
 -9 3 11 3.14 0.36
 -9 3 11 2.67 0.35
 -9 3 11 3.05 0.24
 8 -3 -11 66.71 2.19
 -8 -3 11 63.13 1.75
 -8 3 11 63.29 2.43
 -8 3 11 64.73 1.98
 -8 3 11 69.04 1.81
 -8 3 11 65.53 1.64
 -8 3 11 63.02 1.79
 7 -3 -11 7.39 0.51
 7 -3 -11 6.65 0.48
 7 -3 -11 6.66 0.55
 -7 3 11 6.68 0.32
 -7 3 11 5.14 0.5
 -7 3 11 6.44 0.47
 -7 3 11 6.96 0.52
 -7 3 11 6.38 0.2
 -7 3 11 6.26 0.53
 -7 3 11 6.43 0.37
 -6 -3 11 57.02 1.3
 6 -3 -11 61.16 1.75
 6 -3 -11 56.14 1.72
 6 -3 -11 58.68 1.96
 -6 3 11 56.47 2.2
 -6 3 11 56.49 1.5
 -6 3 11 59.23 1.82
 -6 3 11 56.32 1.35
 -6 3 11 57.67 1.64
 -6 3 11 56.28 1.49
 -6 3 11 57.23 1.65
 5 -3 -11 47.35 1.4
 5 -3 -11 43.69 1.44
 5 -3 -11 42.42 1.35
 -5 3 11 44.97 1.92
 -5 3 11 46.37 1.52
 -5 3 11 44.77 1.54
 -5 3 11 45.15 1.17
 -5 3 11 45.95 1.41
 -5 3 11 45.23 1.61
 -5 3 11 47.04 1.3
 4 -3 -11 21.42 0.84
 4 -3 -11 22.31 0.8
 -4 3 11 22.1 0.91
 -4 3 11 20.49 0.9
 -4 3 11 23.47 1
 3 -3 -11 48.76 1.52
 3 -3 -11 49.08 1.45
 -3 3 11 49.02 1.63
 -3 3 11 49.59 1.56
 -3 3 11 51.05 1.6
 -3 3 11 48.83 1.57
 -2 -3 11 99.02 2.42
 2 -3 -11 98.18 2.76
 -2 -3 11 100.22 2.74
 2 -3 -11 99.45 2.66
 -2 3 11 102.3 2.77
 -2 3 11 101.63 2.85
 -2 3 11 100.7 2.71
 1 -3 -11 204.74 5.3
 1 -3 -11 207.65 5.14
 -1 -3 11 203.29 5.22
 -1 -3 11 205.74 4.93
 -1 -3 11 192.65 4.53
 -1 3 11 203.88 5.06
 -1 3 11 202.84 4.92
 -1 3 11 200.04 5.2
 0 -3 -11 9.92 0.53
 0 -3 11 9.5 0.51
 0 -3 11 10.84 0.53
 0 -3 11 10.59 0.51
 0 -3 -11 10.78 0.5
 0 -3 11 10.98 0.57
 0 3 11 10.9 0.53
 0 3 11 10.23 0.52
 0 3 11 10 0.53
 1 -3 11 6.1 0.43
 -1 -3 -11 6.43 0.4
 1 -3 11 6.48 0.39
 1 -3 11 5.67 0.39
 1 -3 11 6.51 0.45
 1 3 11 6.1 0.39
 -1 3 -11 6.46 0.41
 2 -3 11 0.05 0.15
 2 -3 11 0.01 0.12
 2 -3 11 0.11 0.14
 2 -3 11 -0.22 0.15
 2 -3 11 0.06 0.12
 2 3 11 0.09 0.13
 -2 3 -11 0.03 0.12
 -2 3 -11 0.15 0.12
 3 -3 11 4.27 0.35
 3 -3 11 4.47 0.41
 3 -3 11 4.24 0.33
 3 -3 11 3.87 0.38
 3 -3 11 3.78 0.39
 -3 3 -11 4.59 0.37
 4 -3 11 30.57 1.17
 4 -3 11 31.58 1.07
 4 -3 11 32.17 1.18
 4 -3 11 33.43 1.26
 4 -3 11 30.16 1.16
 4 -3 11 30.67 1.03
 -4 3 -11 33.19 1.15
 -5 -3 -11 17.49 0.75
 5 -3 11 17.27 0.73
 5 -3 11 16.15 0.7
 5 -3 11 17.25 0.75
 5 -3 11 16.8 0.85
 5 -3 11 17.77 0.84
 5 -3 11 18.54 0.92
 -5 -3 -11 20.4 1.87
 5 -3 11 19.21 0.87
 -5 3 -11 18.7 0.79
 -5 3 -11 13.36 1.02
 5 3 11 17.53 0.76
 5 3 11 17.47 0.97
 -5 3 -11 18.81 0.81
 6 -3 11 25.19 0.93
 6 -3 11 25.75 1.14
 6 -3 11 27.33 1.12
 6 -3 11 27.78 1.12
 -6 -3 -11 25.73 2.43
 6 3 11 26.25 0.99
 -6 3 -11 26.4 1.03
 -6 3 -11 26.98 1.04
 6 3 11 25.24 1.28
 -6 3 -11 25.58 0.92
 7 -3 11 1.92 0.37
 7 -3 11 2.23 0.36
 7 -3 11 1.72 0.32
 7 -3 11 2.29 0.35
 7 3 11 2.17 0.43
 -7 3 -11 2.02 0.32
 7 3 11 2.06 0.33
 -7 3 -11 1.95 0.27
 -8 -3 -11 19.96 0.82
 8 -3 11 21.72 0.94
 8 -3 11 18.88 0.91
 8 -3 11 20.61 0.79
 -8 3 -11 22.09 0.77
 8 3 11 20.54 0.82
 8 3 11 20.7 1.06
 -9 -3 -11 4.35 0.36
 9 -3 11 4.18 0.37
 9 -3 11 4.53 0.42
 -9 3 -11 4.41 0.18
 9 3 11 4.71 0.34
 9 3 11 4.28 0.41
 10 -3 11 24.3 0.84
 10 -3 11 24.81 0.72
 -10 -3 -11 24.48 0.69
 10 3 11 25.46 0.79
 -9 -4 11 22.46 0.76
 9 -4 -11 22.5 0.68
 -9 -4 11 22.99 0.9
 9 -4 -11 24.29 0.84
 -9 4 11 24.94 0.73
 -9 4 11 24.56 0.82
 -9 4 11 24.13 0.84
 -9 4 11 24.24 1.1
 8 -4 -11 0.08 0.14
 -8 -4 11 0.18 0.09
 -8 -4 11 -0.01 0.16
 8 -4 -11 0.28 0.16
 8 -4 -11 0.25 0.21
 8 -4 -11 0.12 0.21
 8 -4 -11 0.13 0.18
 -8 4 11 0.01 0.12
 -8 4 11 0.11 0.12
 -8 4 11 0.14 0.17
 -8 4 11 0.24 0.17
 -7 -4 11 19.64 0.87
 7 -4 -11 19.65 0.83
 -7 -4 11 19.83 0.81
 7 -4 -11 19.49 0.86
 7 -4 -11 19.37 0.82
 7 -4 -11 20.06 0.67
 7 -4 -11 19.23 0.97
 -7 4 11 19.76 0.89
 -7 4 11 19.5 1.04
 -7 4 11 19.33 0.67
 -7 4 11 19.41 0.71
 -7 4 11 19.68 0.56
 -7 4 11 18.12 0.81
 -7 4 11 20.57 0.83
 6 -4 -11 4.99 0.32
 -6 -4 11 4.28 0.36
 6 -4 -11 4.16 0.48
 6 -4 -11 3.9 0.41
 6 -4 -11 4.51 0.42
 -6 -4 11 4.95 1.18
 6 -4 -11 3.97 0.38
 6 -4 -11 3.85 0.38
 -6 4 11 3.84 0.44
 -6 4 11 4.83 0.31
 -6 4 11 4.61 0.45
 -6 4 11 3.87 0.33
 -6 4 11 4.64 0.5
 -6 4 11 4.32 0.36
 -6 4 11 4.01 0.39
 5 -4 -11 8.35 0.4
 -5 -4 11 8.59 0.52
 5 -4 -11 7.7 0.49
 5 -4 -11 8.54 0.52
 5 -4 -11 8.13 0.53
 5 -4 -11 8.7 0.52
 5 -4 -11 8.29 0.6
 -5 4 11 8.25 0.47
 -5 4 11 7.66 0.58
 -5 4 11 9.11 0.57
 -5 4 11 8.31 0.57
 -5 4 11 8.36 0.66
 -5 4 11 7.86 0.54
 -5 4 11 8.32 0.48
 -5 4 11 8.7 0.44
 -4 -4 11 10.93 0.32
 4 -4 -11 9.53 0.58
 4 -4 -11 10.56 0.55
 4 -4 -11 10 0.54
 4 -4 -11 10.62 0.58
 4 -4 -11 10.52 0.44
 -4 4 11 9.7 0.62
 -4 4 11 12.86 0.73
 -4 4 11 10.61 0.62
 -4 4 11 10.98 0.6
 -4 4 11 10.54 0.51
 -4 4 11 11.06 0.59
 -4 4 11 11.12 0.66
 3 -4 -11 2.13 0.3
 3 -4 -11 2.25 0.3
 3 -4 -11 2.45 0.29
 3 -4 -11 2.38 0.28
 -3 4 11 2.15 0.32
 -3 4 11 2.75 0.39
 -3 4 11 2.28 0.34
 2 -4 -11 42.79 1.33
 2 -4 -11 38.64 1.4
 -2 -4 11 42.57 1.26
 2 -4 -11 42.3 1.28
 -2 -4 11 42.46 1.42
 2 -4 -11 41.21 1.33
 -2 4 11 42 1.45
 -2 4 11 42.23 1.43
 -1 -4 11 18.03 0.72
 1 -4 -11 16.44 0.7
 -1 -4 11 14.37 0.74
 1 -4 -11 16.02 0.67
 -1 -4 11 17.66 0.73
 1 -4 -11 15.69 0.74
 -1 -4 11 15.95 0.74
 1 -4 -11 15.74 0.67
 -1 4 11 17.53 0.77
 -1 4 11 16.18 0.76
 1 4 -11 17.1 0.72
 -1 4 11 16.22 0.74
 0 -4 11 18.79 0.78
 0 -4 11 17.92 0.74
 0 -4 -11 18.48 0.71
 0 -4 11 18.07 0.82
 0 -4 -11 18.92 0.73
 0 -4 11 18.77 0.84
 0 -4 11 18.93 0.86
 0 4 11 18.19 0.8
 0 4 -11 19.25 0.78
 1 -4 11 7.27 0.46
 -1 -4 -11 7.37 0.33
 1 -4 11 6.88 0.51
 1 -4 11 6.96 0.5
 1 -4 11 7.69 0.5
 1 -4 11 7.23 0.46
 -1 -4 -11 6.98 0.4
 -1 4 -11 7.34 0.49
 -1 4 -11 7.52 0.47
 1 4 11 7.22 0.46
 2 -4 11 0.42 0.19
 2 -4 11 0.8 0.25
 2 -4 11 0.78 0.21
 2 -4 11 0.96 0.24
 2 -4 11 1.03 0.2
 -2 4 -11 0.81 0.21
 3 -4 11 20.18 0.87
 3 -4 11 19.66 0.92
 3 -4 11 17.26 0.75
 3 -4 11 17.74 0.85
 3 -4 11 17.99 0.78
 -3 4 -11 19.62 0.83
 -3 4 -11 19.09 0.88
 4 -4 11 25.76 1.12
 4 -4 11 25.74 0.83
 -4 -4 -11 25.54 2.33
 4 -4 11 24.86 1.05
 4 -4 11 24.7 0.93
 4 -4 11 25.55 1.07
 4 -4 11 25.5 0.98
 4 -4 11 24.78 0.92
 -4 -4 -11 24.77 0.92
 4 4 11 23.89 1.16
 -4 4 -11 24.69 1.01
 -4 4 -11 23.5 1.29
 4 4 11 24.95 0.95
 -4 4 -11 24.29 0.99
 4 4 11 25.33 0.91
 5 -4 11 50.89 1.39
 5 -4 11 51.1 1.65
 5 -4 11 50.16 1.68
 5 -4 11 50.73 1.71
 5 -4 11 50.99 1.57
 -5 -4 -11 48.85 3.64
 5 -4 11 48.69 1.49
 -5 -4 -11 53.49 1.48
 5 -4 11 51.91 1.53
 5 -4 11 48.68 1.77
 5 4 11 49.39 1.55
 -5 4 -11 51.02 1.63
 -5 4 -11 48.15 2.01
 -5 4 -11 52.55 1.51
 5 4 11 49.43 2.02
 6 -4 11 0.77 0.28
 6 -4 11 1.11 0.29
 -6 -4 -11 1.09 0.25
 6 -4 11 1.36 0.29
 6 -4 11 1.41 0.27
 6 -4 11 1.41 0.34
 6 -4 11 1.38 0.32
 6 -4 11 1.49 0.31
 6 4 11 1.11 0.24
 -6 4 -11 1.15 0.25
 6 4 11 0.79 0.26
 -6 4 -11 1.18 0.3
 -6 4 -11 1.15 0.31
 7 -4 11 26.84 1.22
 -7 -4 -11 28.87 2.43
 7 -4 11 27.89 1.16
 -7 -4 -11 31.38 1
 7 -4 11 29.56 0.96
 -7 -4 -11 28.46 1.12
 7 -4 11 29.77 1.15
 7 4 11 30.75 1.07
 7 4 11 29.75 1.37
 -7 4 -11 30.53 0.89
 -7 4 -11 31.18 1.05
 -8 -4 -11 4.38 0.39
 8 -4 11 3.04 0.41
 8 -4 11 3.4 0.32
 8 -4 11 2.88 0.41
 8 4 11 3.98 0.41
 8 4 11 3 0.3
 -8 4 -11 3.65 0.32
 -9 -4 -11 15.92 0.58
 9 -4 11 14.98 0.55
 9 -4 11 15.38 0.67
 9 -4 11 15.67 0.64
 9 4 11 14 0.48
 9 4 11 14.91 0.64
 9 4 11 14.93 0.6
 9 -5 -11 2.33 0.24
 9 -5 -11 2.41 0.36
 -9 -5 11 2.52 0.21
 -9 -5 11 2.11 0.24
 -9 5 11 2.35 0.3
 -9 5 11 2.68 0.26
 -9 5 11 2.45 0.2
 -9 5 11 2.86 0.27
 -8 -5 11 5.2 0.37
 8 -5 -11 6.36 0.56
 -8 -5 11 5.32 0.38
 8 -5 -11 5.16 0.3
 8 -5 -11 5.15 0.44
 8 -5 -11 4.39 0.35
 -8 5 11 5.49 0.38
 -8 5 11 5.12 0.34
 -8 5 11 4.84 0.37
 -8 5 11 5.62 0.5
 7 -5 -11 1.11 0.26
 -7 -5 11 0.62 0.16
 7 -5 -11 0.97 0.2
 7 -5 -11 0.97 0.26
 -7 -5 11 0.99 0.22
 7 -5 -11 0.84 0.26
 7 -5 -11 0.83 0.23
 7 -5 -11 0.63 0.17
 -7 5 11 0.52 0.21
 -7 5 11 1.19 0.2
 -7 5 11 0.65 0.13
 -7 5 11 0.84 0.23
 -7 5 11 0.7 0.23
 -7 5 11 0.87 0.19
 -6 -5 11 1.75 0.29
 6 -5 -11 1.64 0.36
 6 -5 -11 1.62 0.29
 -6 -5 11 1.31 0.25
 6 -5 -11 1.45 0.31
 6 -5 -11 1.41 0.22
 6 -5 -11 1.4 0.26
 6 -5 -11 1.52 0.28
 -6 5 11 1.46 0.27
 -6 5 11 1.08 0.29
 -6 5 11 0.88 0.22
 -6 5 11 1.69 0.26
 -6 5 11 2.22 0.34
 -6 5 11 1.57 0.22
 -6 5 11 1.53 0.3
 5 -5 -11 7.54 0.5
 5 -5 -11 7.58 0.61
 -5 -5 11 7.61 1.43
 5 -5 -11 7.05 0.48
 -5 -5 11 7.56 0.54
 5 -5 -11 6.96 0.53
 5 -5 -11 7.59 0.39
 -5 -5 11 7.14 0.49
 -5 5 11 6.73 0.5
 -5 5 11 8.27 0.51
 -5 5 11 6.8 0.51
 -5 5 11 7.94 0.57
 -5 5 11 9.66 0.73
 -5 5 11 7.12 0.48
 -5 5 11 7.93 0.45
 4 -5 -11 27.03 1.02
 -4 -5 11 27.57 0.72
 4 -5 -11 26.83 0.99
 4 -5 -11 26.71 1.15
 -4 -5 11 23.86 1.16
 4 -5 -11 25.7 1.04
 -4 -5 11 29.3 2.59
 4 -5 -11 25.82 0.99
 4 -5 -11 27.76 0.82
 -4 5 11 26.67 1.02
 -4 5 11 27.51 0.92
 -4 5 11 25.89 1.06
 -4 5 11 25.5 0.99
 -4 5 11 29.08 1.04
 -4 5 11 25.49 0.96
 3 -5 -11 0.53 0.23
 3 -5 -11 0.48 0.18
 -3 -5 11 0.18 0.11
 -3 -5 11 0.17 0.13
 3 -5 -11 0.26 0.18
 3 -5 -11 0.26 0.13
 3 -5 -11 0.29 0.2
 3 -5 -11 0.37 0.18
 -2 -5 11 1.99 0.2
 2 -5 -11 2.42 0.31
 -2 -5 11 2.51 0.38
 2 -5 -11 2.72 0.37
 2 -5 -11 2.33 0.29
 -2 -5 11 2.64 0.41
 2 -5 -11 2.77 0.33
 -2 -5 11 2.9 0.34
 -2 -5 11 2.53 0.24
 2 -5 -11 2.56 0.24
 -2 5 11 2.66 0.41
 -2 5 11 2.81 0.35
 -2 5 11 2.39 0.35
 -2 5 11 2.69 0.34
 -2 5 11 2.94 0.36
 -2 5 11 2.3 0.28
 1 -5 -11 1.83 0.29
 1 -5 -11 2.04 0.45
 -1 -5 11 1.58 0.35
 -1 -5 11 1.68 0.24
 -1 -5 11 1.59 0.26
 -1 -5 11 2.36 0.38
 1 -5 -11 2 0.22
 1 -5 -11 1.68 0.28
 -1 -5 11 1.84 0.21
 -1 -5 11 1.2 0.25
 -1 -5 11 1.65 0.29
 1 -5 -11 1 0.21
 -1 5 11 1.72 0.29
 -1 5 11 1.78 0.22
 -1 5 11 1.54 0.25
 -1 5 11 1.85 0.37
 -1 5 11 1.61 0.31
 1 5 -11 1.66 0.3
 -1 5 11 2.29 0.32
 0 -5 11 4.73 0.35
 0 -5 11 3.77 0.41
 0 -5 -11 4.47 0.29
 0 -5 11 4.2 0.41
 0 -5 -11 4.89 0.51
 0 -5 -11 4.18 0.35
 0 -5 11 4.47 0.39
 0 -5 11 4.78 0.38
 0 -5 11 4.26 0.34
 0 5 -11 4.99 0.4
 0 5 11 4.77 0.45
 0 5 11 4.73 0.35
 0 5 11 4.28 0.41
 0 5 11 4.87 0.41
 1 -5 11 0.33 0.22
 1 -5 11 0.65 0.22
 -1 -5 -11 0.85 0.23
 1 -5 11 0.66 0.21
 1 -5 11 0.61 0.16
 1 -5 11 0.78 0.2
 1 -5 11 0.91 0.25
 1 -5 11 0.91 0.22
 1 -5 11 0.56 0.23
 1 -5 11 0.55 0.2
 -1 5 -11 0.33 0.24
 1 5 11 0.33 0.2
 1 5 11 1 0.28
 1 5 11 0.39 0.22
 -1 5 -11 0.62 0.2
 1 5 11 0.43 0.21
 1 5 11 0.72 0.24
 2 5 11 0.29 0.23
 2 5 11 0.28 0.19
 2 5 11 0.09 0.18
 -2 5 -11 0.38 0.24
 -2 5 -11 -0.05 0.19
 -2 5 -11 0.36 0.21
 -2 5 -11 0.26 0.17
 3 -5 11 4.26 0.47
 3 -5 11 4.35 0.45
 3 -5 11 3.97 0.44
 3 -5 11 3.95 0.46
 3 -5 11 4.03 0.36
 3 -5 11 4.26 0.47
 3 -5 11 4.65 0.4
 3 -5 11 3.94 0.4
 3 -5 11 3.75 0.27
 -3 -5 -11 3.92 1.1
 -3 5 -11 4.43 0.54
 3 5 11 4.42 0.42
 -3 5 -11 4.15 0.43
 3 5 11 4.34 0.44
 3 5 11 4.12 0.34
 -3 5 -11 4.7 0.43
 -3 5 -11 3.52 0.46
 3 5 11 4.44 0.44
 4 -5 11 29.29 1.09
 4 -5 11 27.52 1.07
 4 -5 11 27.64 1.15
 4 -5 11 27.51 0.97
 4 -5 11 27.63 1.14
 -4 -5 -11 29.05 2.56
 4 -5 11 27.63 0.84
 4 -5 11 29.08 1.06
 4 5 11 29.26 1.28
 -4 5 -11 27.53 1.08
 4 5 11 28.97 1.03
 4 5 11 28.23 1.02
 -4 5 -11 28.35 1.11
 4 5 11 29.62 0.98
 -4 5 -11 27.39 1.4
 5 -5 11 14.4 0.73
 5 -5 11 13.79 0.69
 5 -5 11 13.52 0.56
 5 -5 11 13.98 0.78
 5 -5 11 14.18 0.79
 5 -5 11 14.05 0.67
 -5 -5 -11 13.6 1.68
 5 5 11 14.1 0.62
 5 5 11 13.47 0.69
 5 5 11 13.24 0.66
 -5 5 -11 14.41 0.68
 -5 5 -11 12.57 0.72
 5 5 11 13.37 0.79
 -6 -5 -11 2.69 0.88
 6 -5 11 3.32 0.44
 6 -5 11 3.37 0.42
 6 -5 11 2.93 0.31
 6 -5 11 3.53 0.4
 6 -5 11 3.03 0.38
 6 -5 11 3.46 0.48
 6 5 11 3.46 0.41
 -6 5 -11 3.66 0.43
 6 5 11 3.4 0.42
 6 5 11 3.11 0.35
 -6 5 -11 3.19 0.33
 6 5 11 2.97 0.31
 7 -5 11 1.93 0.25
 -7 -5 -11 2.88 0.38
 7 -5 11 1.9 0.34
 7 -5 11 2.15 0.34
 -7 5 -11 2.36 0.31
 -7 5 -11 2.45 0.22
 7 5 11 2.72 0.37
 7 5 11 2.49 0.27
 7 5 11 2.32 0.3
 7 5 11 2.25 0.33
 8 -5 11 3.54 0.35
 -8 -5 -11 3.38 0.34
 8 -5 11 3.61 0.26
 8 5 11 4.52 0.38
 -8 5 -11 3.68 0.26
 8 5 11 4.05 0.32
 -8 -6 11 0.59 0.14
 8 -6 -11 0.55 0.17
 -8 -6 11 0.5 0.11
 8 -6 -11 0.72 0.16
 -8 6 11 0.72 0.14
 -8 6 11 0.52 0.15
 -8 6 11 0.84 0.17
 7 -6 -11 5.42 0.3
 7 -6 -11 5.9 0.36
 -7 -6 11 5.03 0.4
 7 -6 -11 5.11 0.45
 -7 -6 11 4.21 0.89
 -7 -6 11 5.53 0.37
 7 -6 -11 6.09 0.51
 -7 6 11 5.45 0.52
 -7 6 11 6.16 0.27
 -7 6 11 5.89 0.35
 -7 6 11 5.53 0.39
 -7 6 11 6.24 0.41
 -7 6 11 5.88 0.38
 -6 -6 11 15.97 0.81
 6 -6 -11 14.45 0.76
 6 -6 -11 14.51 0.69
 -6 -6 11 15.12 0.65
 6 -6 -11 15.44 0.65
 6 -6 -11 16.05 0.92
 -6 -6 11 14.36 1.61
 6 -6 -11 15.61 0.54
 6 -6 -11 13.87 0.75
 -6 6 11 15.24 0.69
 -6 6 11 16.87 0.72
 -6 6 11 15.61 0.67
 -6 6 11 16.34 0.59
 -6 6 11 16.54 0.68
 5 -6 -11 23.25 0.88
 5 -6 -11 23.34 0.92
 5 -6 -11 24.17 1.22
 5 -6 -11 22.52 1.01
 5 -6 -11 24.24 0.74
 -5 -6 11 23.6 0.86
 5 -6 -11 23.87 0.95
 -5 -6 11 24.45 2.25
 -5 -6 11 24.36 1.13
 -5 6 11 25.06 0.86
 -5 6 11 24.79 0.97
 -5 6 11 26.92 0.97
 -5 6 11 26.36 0.96
 4 -6 -11 1.89 0.29
 -4 -6 11 2.01 0.17
 4 -6 -11 1.73 0.36
 -4 -6 11 1.49 0.33
 4 -6 -11 1.55 0.23
 4 -6 -11 1.85 0.31
 4 -6 -11 1.9 0.38
 4 -6 -11 2.22 0.34
 -4 -6 11 1.73 0.28
 4 -6 -11 1.67 0.32
 -4 6 11 1.5 0.28
 -4 6 11 1.59 0.32
 -4 6 11 1.68 0.33
 -4 6 11 1.59 0.27
 -3 -6 11 0.48 0.12
 3 -6 -11 0.35 0.15
 3 -6 -11 0.21 0.18
 3 -6 -11 0.19 0.22
 -3 -6 11 0.11 0.24
 3 -6 -11 0.32 0.16
 3 -6 -11 0.29 0.2
 -3 -6 11 0.4 0.21
 -3 -6 11 0.26 0.16
 3 -6 -11 0.44 0.22
 -3 6 11 0.24 0.23
 -3 6 11 0.03 0.18
 -3 6 11 0.33 0.26
 -3 6 11 0.53 0.14
 -3 6 11 0.35 0.21
 -3 6 11 0.42 0.26
 2 -6 -11 -0.04 0.2
 2 -6 -11 0.23 0.19
 -2 6 11 0.33 0.25
 -2 6 11 0 0.19
 -2 6 11 -0.21 0.16
 -2 6 11 -0.23 0.12
 -1 6 11 0.28 0.19
 -1 6 11 0.58 0.2
 -1 6 11 0.34 0.13
 -1 6 11 0.68 0.31
 -1 6 11 0.47 0.24
 0 6 11 3.5 0.38
 0 6 11 3.35 0.37
 0 6 11 3.06 0.45
 0 6 11 3 0.41
 0 6 11 3.84 0.31
 1 -6 11 21.52 0.58
 1 -6 11 21.56 0.89
 1 -6 11 20.99 0.81
 1 -6 11 23.04 0.9
 1 -6 11 23.56 0.95
 1 -6 11 21.03 0.76
 1 -6 11 21.27 0.98
 -1 -6 -11 21.17 0.98
 1 -6 11 20.61 0.91
 1 6 11 22.55 0.92
 1 6 11 22.36 0.79
 1 6 11 22.29 0.91
 1 6 11 22.22 0.93
 -1 6 -11 21.97 1.24
 -1 6 -11 22.38 0.95
 -1 6 -11 22.45 0.96
 2 -6 11 15.52 0.72
 2 -6 11 14.76 0.75
 2 -6 11 15.91 0.83
 2 -6 11 15.32 0.57
 2 -6 11 15.13 0.83
 2 -6 11 15.67 0.74
 2 -6 11 15.68 0.68
 2 -6 11 15.63 0.79
 2 6 11 17.12 0.78
 -2 6 -11 16.61 0.8
 2 6 11 15.77 0.77
 -2 6 -11 16.04 1.01
 2 6 11 16.11 0.7
 -2 6 -11 16.64 0.79
 2 6 11 16.51 0.8
 3 -6 11 0.5 0.22
 3 -6 11 0.53 0.22
 3 -6 11 0.51 0.17
 -3 -6 -11 0.1 0.22
 3 -6 11 0.42 0.26
 3 -6 11 0.33 0.23
 3 -6 11 0.29 0.21
 3 -6 11 0.55 0.25
 3 6 11 0.66 0.23
 3 6 11 0.44 0.23
 -3 6 -11 0.52 0.24
 -3 6 -11 0.32 0.23
 3 6 11 0.83 0.25
 -3 6 -11 0.65 0.22
 4 -6 11 -0.06 0.28
 4 -6 11 0.1 0.22
 4 -6 11 -0.01 0.16
 4 -6 11 -0.12 0.18
 4 -6 11 0.28 0.21
 4 -6 11 -0.22 0.2
 4 -6 11 -0.06 0.2
 4 -6 11 0.29 0.19
 -4 -6 -11 -0.01 0.16
 -4 6 -11 0.76 0.38
 -4 6 -11 0.08 0.21
 4 6 11 0.29 0.2
 4 6 11 0 0.2
 -4 6 -11 0.14 0.19
 4 6 11 0.11 0.19
 5 -6 11 4.92 0.49
 5 -6 11 5.38 0.5
 5 -6 11 5 0.38
 5 -6 11 5.32 0.25
 -5 -6 -11 5.08 1.01
 5 -6 11 4.8 0.45
 5 -6 11 4.76 0.48
 5 -6 11 5.13 0.44
 5 6 11 5.49 0.42
 5 6 11 5.1 0.44
 -5 6 -11 4.4 0.39
 5 6 11 5.05 0.42
 6 -6 11 -0.03 0.15
 6 -6 11 -0.04 0.19
 -6 -6 -11 0 0.13
 6 -6 11 0.29 0.2
 6 -6 11 -0.22 0.09
 6 -6 11 0.17 0.22
 6 -6 11 0.13 0.19
 6 6 11 0.1 0.18
 6 6 11 -0.13 0.15
 -6 6 -11 0.05 0.2
 -6 6 -11 0.08 0.14
 6 6 11 0.35 0.19
 7 -6 11 0.04 0.2
 7 -6 11 -0.14 0.14
 -7 -6 -11 -0.18 0.14
 -7 -6 -11 0.03 0.12
 7 6 11 0.11 0.15
 7 6 11 -0.05 0.15
 7 6 11 -0.14 0.12
 -7 6 -11 0.15 0.14
 -7 -7 11 10.27 0.54
 -7 -7 11 10.56 1.06
 7 -7 -11 11.1 0.56
 7 -7 -11 11.3 0.42
 -7 7 11 10.75 0.45
 -7 7 11 10.92 0.38
 -7 7 11 11.36 0.46
 -7 7 11 10.54 0.46
 -6 -7 11 0.2 0.13
 -6 -7 11 0.09 0.1
 -6 -7 11 -0.09 0.13
 6 -7 -11 0.24 0.14
 6 -7 -11 0.22 0.17
 -6 7 11 0.26 0.14
 -6 7 11 0.44 0.16
 -6 7 11 0.35 0.12
 -6 7 11 0.25 0.14
 -5 -7 11 2.22 0.8
 5 -7 -11 3.48 0.4
 -5 -7 11 3.03 0.31
 5 -7 -11 3.11 0.37
 -5 -7 11 3.63 0.39
 -5 7 11 3.32 0.36
 5 7 -11 3.82 0.36
 -5 7 11 4.06 0.41
 -5 7 11 4.04 0.36
 -5 7 11 3.59 0.32
 -4 -7 11 10.67 0.54
 -4 -7 11 11.59 0.72
 4 -7 -11 11.45 0.7
 4 -7 -11 10.73 0.59
 -4 -7 11 10.84 1.39
 4 -7 -11 11.03 0.66
 4 7 -11 11.66 0.61
 -4 7 11 11.9 0.59
 -4 7 11 12 0.62
 -4 7 11 12.33 0.66
 -4 7 11 12.09 0.61
 3 -7 -11 0.32 0.19
 3 -7 -11 0.1 0.2
 -3 -7 11 -0.09 0.16
 3 -7 -11 0.08 0.15
 -3 -7 11 0.14 0.12
 -3 -7 11 0.15 0.08
 3 -7 -11 0.22 0.2
 -3 -7 11 0.07 0.17
 -3 -7 11 0.04 0.12
 -3 7 11 0.46 0.2
 3 7 -11 0.16 0.2
 -3 7 11 0.24 0.21
 -3 7 11 0.22 0.21
 -2 -7 11 8.22 0.45
 2 -7 -11 7.79 0.55
 2 -7 -11 7.78 0.57
 -2 -7 11 10.32 1.35
 -2 -7 11 7.61 0.63
 -2 -7 11 7.96 0.38
 2 -7 -11 6.77 0.55
 -2 7 11 8.66 0.54
 -2 7 11 8.46 0.57
 -2 7 11 8.87 0.66
 2 7 -11 7.95 0.53
 -2 7 11 8.21 0.42
 1 7 -11 0.3 0.22
 -1 7 11 0.24 0.2
 1 7 -11 0.23 0.21
 -1 7 11 0.51 0.31
 -1 7 11 0.27 0.21
 1 7 -11 0.26 0.21
 -1 7 11 0.19 0.17
 0 7 11 3.47 0.27
 0 7 11 3.4 0.38
 0 7 -11 3.05 0.49
 0 7 -11 3.51 0.4
 0 7 11 3.2 0.4
 0 7 11 3.44 0.42
 -1 -7 -11 6.84 0.42
 1 -7 11 8.63 0.56
 1 -7 11 7.65 0.47
 1 -7 11 7.73 0.5
 1 -7 11 6.9 0.52
 1 -7 11 6.94 0.4
 1 -7 11 7.18 0.57
 1 -7 11 7.26 0.51
 1 7 11 8.1 0.52
 -1 7 -11 7.58 0.52
 1 7 11 7.62 0.4
 1 7 11 7.71 0.52
 -1 7 -11 7.78 0.67
 1 7 11 7.38 0.52
 -2 -7 -11 32.29 0.95
 -2 -7 -11 35.56 2.6
 2 -7 11 32.48 1.18
 2 -7 11 32.61 1.08
 2 -7 11 32.26 1.25
 2 -7 11 32.95 1.13
 2 -7 11 32.91 1.01
 2 -7 11 31.26 1.17
 2 -7 11 32.52 1.17
 -2 7 -11 33.69 1.18
 2 7 11 35.37 1.15
 2 7 11 32.1 1.14
 2 7 11 33.99 1.02
 -2 7 -11 33.95 1.54
 2 7 11 34.49 1.16
 3 -7 11 13.55 0.72
 3 -7 11 14.74 0.7
 3 -7 11 14.63 0.48
 3 -7 11 14.61 0.64
 -3 -7 -11 13.31 1.65
 3 -7 11 14.54 0.69
 3 -7 11 14.51 0.74
 -3 -7 -11 15.11 0.47
 3 -7 11 13.86 0.76
 -3 7 -11 16.97 0.96
 3 7 11 14.78 0.71
 -3 7 -11 14.86 0.72
 3 7 11 15.61 0.72
 3 7 11 14.09 0.74
 -3 7 -11 17.04 0.75
 3 7 11 15.11 0.63
 4 -7 11 1.82 0.33
 4 -7 11 1.59 0.31
 4 -7 11 2.01 0.22
 4 -7 11 1.83 0.29
 4 -7 11 1.53 0.29
 -4 7 -11 1.7 0.28
 4 7 11 1.95 0.28
 4 7 11 1.43 0.26
 4 7 11 1.67 0.27
 5 -7 11 2.36 0.33
 -5 -7 -11 1.81 0.63
 5 -7 11 2.86 0.4
 5 -7 11 2.26 0.23
 5 -7 11 2.69 0.37
 5 7 11 2.75 0.33
 -5 7 -11 2.78 0.37
 5 7 11 2.51 0.32
 5 7 11 2.56 0.31
 -5 7 -11 2.83 0.27
 -6 -7 -11 4.95 0.78
 6 -7 11 5.23 0.38
 6 -7 11 4.97 0.27
 6 -7 11 5.55 0.46
 -6 -7 -11 4.88 0.36
 6 -7 11 5.37 0.44
 6 7 11 5.68 0.36
 6 7 11 5.33 0.34
 6 7 11 6.11 0.37
 -6 7 -11 5.44 0.35
 5 -8 -11 3.93 0.28
 -5 -8 11 2.55 0.68
 -5 8 11 3.53 0.3
 -5 8 11 3.76 0.29
 5 8 -11 3.37 0.41
 5 8 -11 3.24 0.31
 -5 8 11 3.44 0.27
 -5 8 11 3.4 0.23
 -4 -8 11 5.56 0.95
 4 -8 -11 6.37 0.38
 -4 8 11 7.16 0.46
 -4 8 11 6.84 0.38
 -4 8 11 7.04 0.41
 4 8 -11 6.36 0.42
 4 8 -11 7.05 0.41
 4 8 -11 7.03 0.54
 -4 8 11 6.69 0.39
 -3 -8 11 5.55 1.08
 3 -8 -11 6.38 0.4
 3 8 -11 6.36 0.44
 3 8 -11 6.39 0.41
 -3 8 11 7.4 0.45
 3 8 -11 7.33 0.58
 -3 8 11 6.48 0.42
 -3 8 11 5.9 0.41
 -2 -8 11 1.51 0.22
 2 -8 -11 1.92 0.27
 -2 -8 11 1.59 0.15
 -2 -8 11 2.53 0.79
 2 8 -11 1.28 0.23
 -2 8 11 1.86 0.28
 -2 8 11 1.72 0.13
 2 8 -11 2.12 0.38
 -2 8 11 1.61 0.27
 2 8 -11 2.03 0.27
 1 -8 -11 10.87 0.49
 -1 -8 11 11.28 0.51
 -1 -8 11 10.39 0.42
 1 8 -11 10.92 0.54
 -1 8 11 11.27 0.46
 -1 8 11 12.76 0.74
 1 8 -11 11.51 0.58
 1 8 -11 10.89 0.73
 -1 8 11 12.07 0.57
 -1 8 11 11.82 0.59
 0 -8 11 1.5 0.25
 0 -8 11 1.26 0.16
 0 -8 11 1.25 0.19
 0 -8 -11 1.24 0.19
 0 8 11 1.04 0.23
 0 8 11 1.13 0.22
 0 8 -11 0.96 0.25
 0 8 -11 1.1 0.21
 0 8 11 0.96 0.23
 1 -8 11 6.03 0.5
 1 -8 11 6.5 0.4
 1 -8 11 6.38 0.37
 -1 -8 -11 6.21 0.31
 1 -8 11 6.63 0.45
 1 8 11 6.24 0.44
 -1 8 -11 6.24 0.41
 1 8 11 6.54 0.24
 1 8 11 6.7 0.46
 1 8 11 6.7 0.44
 -1 8 -11 6.37 0.52
 2 -8 11 0.43 0.21
 2 -8 11 0.29 0.19
 2 -8 11 0.78 0.19
 2 -8 11 0.59 0.17
 2 -8 11 0.65 0.13
 2 8 11 0.66 0.14
 2 8 11 0.44 0.19
 -2 8 -11 0.62 0.2
 2 8 11 0.66 0.22
 2 8 11 0.76 0.21
 3 -8 11 7.02 0.5
 3 -8 11 8.02 0.44
 -3 -8 -11 7.83 1.1
 3 -8 11 7.51 0.34
 3 -8 11 7.17 0.44
 3 8 11 8.15 0.47
 3 8 11 6.86 0.44
 3 8 11 7.87 0.43
 3 8 11 7.77 0.34
 -3 8 -11 8.08 0.44
 4 -8 11 0.47 0.18
 4 -8 11 0.14 0.12
 -4 -8 -11 -0.03 0.13
 4 -8 11 0.04 0.14
 4 -8 11 0.05 0.15
 4 8 11 0.28 0.16
 4 8 11 0.21 0.1
 4 8 11 0.06 0.12
 -4 8 -11 0.1 0.12
 -4 8 -11 -0.01 0.18
 4 8 11 0.27 0.14
 -10 0 12 94.16 3.07
 -10 0 12 92.49 2.2
 -10 0 12 91.58 2.22
 -9 0 12 61.52 1.66
 -9 0 12 59.83 1.64
 -9 0 12 59.15 2.1
 -8 0 12 18.76 0.9
 -8 0 12 18.96 0.49
 -8 0 12 19.14 0.81
 -8 0 12 19.35 0.79
 -7 0 12 16.46 0.81
 -7 0 12 16.3 0.77
 -7 0 12 15.36 0.45
 6 0 -12 11.68 0.43
 -6 0 12 12.31 0.7
 -6 0 12 11.19 0.66
 -5 0 12 9.51 0.61
 -5 0 12 10.11 0.59
 -5 0 12 9.87 0.59
 5 0 -12 9.96 0.36
 -4 0 12 5.76 0.43
 4 0 -12 5.75 0.25
 -4 0 12 5.86 0.42
 -3 0 12 0.62 0.18
 -3 0 12 0.29 0.15
 3 0 -12 0.54 0.1
 2 0 -12 13.16 0.47
 -2 0 12 12.43 0.6
 -2 0 12 12.33 0.58
 -1 0 12 84.16 2.36
 -1 0 12 84.78 2.25
 1 0 -12 83.23 2.26
 0 0 12 81.21 2.17
 0 0 12 78.5 2.27
 0 0 -12 81.99 2.22
 1 0 12 36.18 1.18
 1 0 12 34.03 1.21
 -1 0 -12 40.52 1.2
 -2 0 -12 165.15 4.39
 2 0 12 168.15 4.11
 2 0 12 163.73 4.32
 3 0 12 0.18 0.13
 3 0 12 0.13 0.13
 4 0 12 129.56 3.35
 4 0 12 128 3.49
 5 0 12 28.34 1.1
 5 0 12 29.01 1.09
 -6 0 -12 55.53 1.51
 6 0 12 55.92 2.17
 6 0 12 55.52 1.66
 6 0 12 56.33 1.62
 -6 0 -12 55.66 1.63
 6 0 12 55.95 1.77
 7 0 12 20.68 0.87
 7 0 12 20 1.03
 -7 0 -12 19.89 0.8
 -7 0 -12 19.96 0.68
 7 0 12 20.24 0.93
 7 0 12 19.03 0.79
 8 0 12 13.32 0.62
 8 0 12 13.99 0.81
 8 0 12 14.03 0.7
 -8 0 -12 13.52 0.59
 8 0 12 13.98 0.76
 -9 0 -12 4.26 0.43
 9 0 12 3.9 0.42
 9 0 12 3.52 0.42
 9 0 12 4.01 0.38
 9 0 12 3.4 0.29
 10 0 12 8.18 0.5
 10 0 12 9.3 0.46
 -10 0 -12 9.15 0.46
 -10 -1 12 8.42 0.44
 -10 1 12 9.31 0.46
 -10 1 12 8.66 0.46
 -10 1 12 9.14 0.51
 -9 1 12 19.92 0.93
 -9 1 12 20.67 0.55
 -9 1 12 21.11 0.81
 -9 1 12 21.69 0.84
 -8 1 12 5.22 0.42
 -8 1 12 4.98 0.26
 -8 1 12 5.85 0.46
 -8 1 12 5.47 0.47
 -8 1 12 6.47 0.54
 7 -1 -12 30.48 1.22
 7 -1 -12 27.17 0.91
 -7 1 12 27.58 0.77
 -7 1 12 29.53 1.14
 -7 1 12 26.86 1.15
 -7 1 12 28.21 1
 -7 1 12 29.15 1.03
 6 -1 -12 2.2 0.2
 6 -1 -12 2.17 0.22
 -6 1 12 1.96 0.19
 -6 1 12 1.57 0.3
 -6 1 12 1.95 0.33
 -6 1 12 2.43 0.35
 -5 -1 12 15.76 0.78
 5 -1 -12 17.23 0.61
 -5 -1 12 17.79 0.81
 -5 1 12 16.57 0.81
 -5 1 12 17.49 0.81
 -5 1 12 17.33 0.8
 -5 1 12 15.94 0.8
 -4 -1 12 21.65 0.88
 4 -1 -12 21.11 0.7
 -4 -1 12 21.15 0.85
 -4 1 12 20.5 0.88
 -4 1 12 22.82 0.93
 -4 1 12 20.28 0.86
 -3 -1 12 20.13 0.82
 -3 -1 12 20.28 0.79
 3 -1 -12 20.33 0.68
 -3 1 12 19 0.79
 -3 1 12 19.83 0.83
 3 1 -12 20.34 0.6
 -2 -1 12 129.03 3.38
 -2 -1 12 139.37 3.59
 2 -1 -12 136.12 3.51
 2 1 -12 143.59 3.62
 -2 1 12 142.26 3.76
 -2 1 12 138.02 3.55
 1 -1 -12 61.8 1.64
 -1 -1 12 53.9 1.61
 -1 -1 12 53.91 1.7
 1 1 -12 55.43 1.57
 -1 1 12 55.04 1.68
 -1 1 12 56.88 1.62
 0 -1 -12 61.36 1.76
 0 -1 12 62.3 1.76
 0 -1 12 61.02 1.83
 0 1 12 62.63 1.85
 0 1 12 63 1.78
 0 1 -12 64.89 1.82
 -1 -1 -12 13.46 0.59
 1 -1 12 13.92 0.62
 1 -1 12 13.95 0.64
 1 -1 12 13.53 0.55
 -1 1 -12 13.02 0.58
 1 1 12 13.04 0.59
 1 1 12 14 0.62
 2 -1 12 4.56 0.31
 2 -1 12 4.95 0.38
 2 -1 12 4.39 0.37
[truncated: 248,409 more chars]
